# Supplementary material for: Histone Maps in Gossypium darwinii Reveal Epigenetic Regulation Drives Subgenome Divergence and Cotton Domestication
Source: Int J Mol Sci. 2023 Jun 25;24(13):10607. doi: 10.3390/ijms241310607 (PMC10341804; doi:10.3390/ijms241310607)
Supplement: Supplementary file 1 [file ijms-24-10607-s001.zip]

Archive with 7 entries (7 files):
- Supplementary Fig 1-7.pdf
- Supplementary Table 1.xlsx
- Supplementary Table 2.xlsx
- Supplementary Table 3.xlsx
- Supplementary Table 4.xlsx
- Supplementary Table 5.xlsx
- Supplementary Table 6.xlsx
