# Supplementary material for: Histone Maps in Gossypium darwinii Reveal Epigenetic Regulation Drives Subgenome Divergence and Cotton Domestication
Source: Int J Mol Sci. 2023 Jun 25;24(13):10607. doi: 10.3390/ijms241310607 (PMC10341804; doi:10.3390/ijms241310607)
Supplement: Supplementary file 1 [file ijms-24-10607-s001.zip › Supplementary Table 1.xlsx]

## Sheet: Sheet1
Supplemental Table 1. Summary of ChIP–seq data obtained in this study.
Histone mark	Library	Total read pairs	Properly mapped read pairs	Unique read pairs
H3K4me3	Replicate1	33804923	30302383	24974079
	Replicate2	33639479	29611476	24482295
H3K27me3	Replicate1	34016077	26350702	21713260
	Replicate2	31901881	23506325	19448438
H3K36me3	Replicate1	20595712	18331793	14936617
	Replicate2	33855323	32660726	25666382
H3K27ac	Replicate1	32174277	29415444	21847628
	Replicate2	36838861	33648960	24988528
H3K9ac	Replicate1	32189230	28982244	23331556
	Replicate2	33390295	30239789	24274898
Mock		23330261	20827615	16502001
