# Supplementary material for: Histone Maps in Gossypium darwinii Reveal Epigenetic Regulation Drives Subgenome Divergence and Cotton Domestication
Source: Int J Mol Sci. 2023 Jun 25;24(13):10607. doi: 10.3390/ijms241310607 (PMC10341804; doi:10.3390/ijms241310607)
Supplement: Supplementary file 1 [file ijms-24-10607-s001.zip › Supplementary Table 2.xlsx]

## Sheet: Sheet1
Supplemental Table 2. Histone peaks in cotton genome.
H3K4me3				H3K27me3				H3K36me3				H3K27ac				H3K9ac
Chr	start	end		Chr	start	end		Chr	start	end		Chr	start	end		Chr	start	end
A01	14014	14621		A01	50974	51610		A01	8560	12516		A01	35172	37017		A01	62252	63319
A01	68425	70577		A01	69846	70552		A01	47153	52125		A01	38048	40216		A01	66034	66754
A01	73561	74828		A01	73611	83084		A01	64320	66714		A01	61750	63759		A01	68591	70622
A01	81209	82373		A01	132795	133891		A01	68192	70560		A01	66100	66737		A01	73572	76756
A01	96105	99467		A01	165277	176516		A01	73591	74806		A01	67924	70563		A01	96132	97321
A01	105556	107601		A01	181284	181774		A01	101784	107544		A01	73560	76832		A01	101775	102427
A01	112481	113251		A01	192304	192900		A01	131120	131545		A01	99779	102447		A01	104747	110996
A01	124418	125545		A01	211858	212356		A01	150771	156875		A01	104832	110874		A01	112494	112976
A01	127287	131583		A01	217398	229017		A01	158255	158993		A01	119497	120184		A01	119428	120184
A01	150797	156615		A01	234487	235238		A01	160208	161316		A01	124342	128459		A01	124341	128942
A01	158125	161199		A01	265029	271001		A01	175852	178199		A01	129635	133261		A01	130030	133399
A01	167322	169203		A01	282397	283403		A01	179350	181641		A01	147928	149426		A01	147848	148774
A01	175852	177901		A01	310928	311573		A01	214645	215288		A01	150801	151848		A01	150762	152261
A01	179657	181786		A01	357701	367147		A01	232172	235349		A01	157904	158990		A01	157851	159009
A01	189874	192978		A01	370069	378643		A01	282425	292169		A01	175854	178036		A01	160074	161329
A01	214616	215284		A01	391620	392272		A01	337220	339179		A01	191633	192926		A01	175857	176556
A01	217220	223522		A01	408201	408744		A01	340555	343451		A01	195644	196074		A01	191706	192956
A01	225431	226077		A01	414057	423559		A01	391613	397694		A01	201270	202572		A01	211878	212441
A01	228363	229079		A01	475941	476601		A01	408201	411985		A01	214645	215287		A01	214619	215284
A01	232270	235355		A01	548022	557643		A01	425653	427942		A01	222980	223522		A01	221510	223522
A01	238013	239261		A01	564591	565294		A01	459572	462873		A01	234294	235346		A01	234314	235345
A01	253788	254665		A01	569352	569921		A01	474316	476623		A01	282386	283218		A01	253811	254358
A01	266611	269967		A01	577735	578571		A01	564541	567447		A01	310868	311701		A01	282329	283635
A01	320811	321563		A01	586420	593918		A01	569284	571947		A01	391614	392758		A01	310812	311680
A01	337218	339090		A01	620268	621195		A01	586478	587057		A01	405032	405455		A01	340556	341245
A01	358660	360216		A01	627060	627665		A01	595168	596274		A01	445970	446928		A01	391600	392478
A01	387343	388032		A01	639010	640030		A01	604190	610503		A01	459577	460514		A01	405029	405454
A01	404968	405498		A01	681028	681790		A01	617701	621207		A01	475511	477877		A01	408202	408868
A01	408201	411752		A01	699922	700596		A01	627009	627678		A01	481237	481784		A01	445970	446788
A01	415664	418061		A01	702845	703530		A01	633459	634645		A01	484740	485671		A01	459547	460512
A01	445948	447049		A01	706190	706713		A01	637458	640078		A01	564566	565445		A01	475620	476621
A01	459533	461385		A01	776959	780720		A01	652891	655613		A01	569321	572074		A01	481239	481804
A01	474539	476622		A01	787234	789849		A01	681015	681894		A01	586325	587057		A01	484724	485673
A01	480472	481806		A01	816304	817273		A01	683795	687089		A01	594888	596274		A01	512749	513735
A01	495657	496734		A01	831112	838238		A01	694534	697314		A01	604167	604891		A01	564486	565444
A01	507641	508671		A01	840941	846521		A01	699010	700659		A01	612596	613561		A01	569300	572074
A01	520200	522756		A01	855536	856355		A01	702828	704704		A01	620060	621228		A01	577916	578568
A01	554826	556162		A01	913436	924589		A01	706190	710948		A01	627058	627707		A01	586232	587057
A01	564520	566777		A01	937998	964307		A01	712918	718486		A01	633444	636627		A01	594685	596289
A01	577508	578636		A01	1140167	1141221		A01	784494	792029		A01	637520	640157		A01	604108	604889
A01	586288	587066		A01	1143188	1143857		A01	811001	817302		A01	642654	643509		A01	612599	613562
A01	591866	592701		A01	1157707	1158360		A01	797635	810144		A01	645633	646313		A01	620141	621238
A01	594685	596276		A01	1169766	1170356		A01	840960	842755		A01	654689	655614		A01	627038	627713
A01	612848	613648		A01	1226213	1226713		A01	850671	853686		A01	681008	681946		A01	633440	636493
A01	617990	621219		A01	1229304	1230155		A01	861848	865500		A01	683755	684416		A01	638982	640115
A01	626906	627739		A01	1253817	1254338		A01	876353	879057		A01	699044	700688		A01	642643	643507
A01	633414	636059		A01	1270205	1270865		A01	880590	883293		A01	702803	703816		A01	645639	646351
A01	637693	640115		A01	1289385	1290193		A01	916326	916884		A01	706192	706652		A01	654691	655614
A01	642650	643481		A01	1335789	1356084		A01	933909	936399		A01	717411	718517		A01	680836	681948
A01	645625	646361		A01	1381873	1382351		A01	1138341	1141275		A01	786926	788078		A01	683743	684425
A01	652453	655617		A01	1412686	1415177		A01	1143198	1147761		A01	789005	790566		A01	694504	695518
A01	681002	681945		A01	1488615	1489190		A01	1153157	1156212		A01	795281	795795		A01	699468	700673
A01	699006	700635		A01	1570677	1571561		A01	1157707	1161491		A01	816249	817299		A01	702807	703691
A01	702807	704550		A01	1574898	1582503		A01	1177117	1180492		A01	832512	838875		A01	706176	706728
A01	743103	743915		A01	1591123	1606526		A01	1223454	1226789		A01	840910	846556		A01	717285	718631
A01	777103	777776		A01	1619249	1620009		A01	1227657	1230124		A01	850625	851945		A01	724772	725397
A01	784652	792743		A01	1682781	1684608		A01	1233154	1236953		A01	855452	856183		A01	787060	790410
A01	811721	817323		A01	1689120	1689642		A01	1250015	1254410		A01	861358	863675		A01	816226	817323
A01	823719	825557		A01	1695713	1696230		A01	1270196	1286280		A01	872583	879074		A01	831105	831451
A01	831105	831471		A01	1706193	1706739		A01	1287769	1290212		A01	881966	883303		A01	840919	846571
A01	832508	837840		A01	1752894	1753546		A01	1304651	1310865		A01	904026	905259		A01	832504	838995
A01	840918	846568		A01	1783044	1783833		A01	1322103	1323730		A01	934441	936399		A01	850553	851970
A01	850637	853633		A01	1837416	1838405		A01	1383473	1386565		A01	1140015	1141266		A01	855482	856371
A01	861863	865433		A01	1865289	1869619		A01	1430902	1432875		A01	1153259	1155156		A01	861352	863545
A01	876593	879079		A01	1915291	1916149		A01	1452686	1453980		A01	1157619	1158736		A01	870343	870976
A01	880729	883296		A01	1921598	1922407		A01	1568821	1571545		A01	1169482	1170900		A01	877448	879067
A01	914760	917056		A01	1959945	1960893		A01	1616247	1620021		A01	1174663	1175164		A01	881986	883293
A01	934166	936400		A01	1976161	1976871		A01	1668813	1671804		A01	1177095	1177886		A01	934940	936404
A01	943528	944675		A01	2037302	2037985		A01	1683197	1684644		A01	1223422	1223958		A01	1140123	1141276
A01	946344	947103		A01	2040624	2041251		A01	1689118	1693868		A01	1229199	1230120		A01	1143203	1143866
A01	1125699	1126103		A01	2046698	2047530		A01	1695703	1697962		A01	1233071	1234873		A01	1153259	1155534
A01	1138354	1141276		A01	2085271	2085974		A01	1704143	1706753		A01	1247859	1248613		A01	1157641	1158403
A01	1153216	1155606		A01	2100257	2102306		A01	1708014	1710285		A01	1270196	1270775		A01	1169647	1170906
A01	1157682	1160991		A01	2105853	2124169		A01	1711646	1718902		A01	1289211	1291506		A01	1174663	1175109
A01	1174687	1175107		A01	2155710	2156385		A01	1741723	1743691		A01	1292571	1293940		A01	1177088	1177956
A01	1177094	1179498		A01	2165672	2166973		A01	1783080	1783866		A01	1302161	1303844		A01	1223395	1223949
A01	1223395	1226782		A01	2179389	2192528		A01	1872175	1876775		A01	1309979	1311025		A01	1226061	1226771
A01	1227962	1230168		A01	2254247	2254946		A01	1891564	1896115		A01	1322120	1324427		A01	1229199	1230166
A01	1233057	1236308		A01	2355527	2356240		A01	1915213	1918166		A01	1329326	1329667		A01	1233076	1234816
A01	1243754	1246113		A01	2364873	2365373		A01	1919689	1922340		A01	1362677	1367885		A01	1247844	1248493
A01	1288164	1291371		A01	2367467	2368018		A01	1955266	1960931		A01	1369072	1370393		A01	1253827	1254385
A01	1292656	1293935		A01	2417337	2417892		A01	1966240	1969690		A01	1371614	1372712		A01	1270183	1270874
A01	1322117	1324353		A01	2439642	2440374		A01	1976160	1982698		A01	1381721	1382426		A01	1289261	1291472
A01	1327848	1329653		A01	2449400	2449987		A01	2017618	2018265		A01	1383475	1386710		A01	1292564	1293980
A01	1338266	1338672		A01	2458164	2458676		A01	2034145	2038011		A01	1417725	1418392		A01	1302280	1303768
A01	1345616	1347063		A01	2472381	2473265		A01	2039331	2041333		A01	1488633	1489178		A01	1309964	1311041
A01	1352601	1354077		A01	2486520	2487232		A01	2046698	2050597		A01	1570511	1571571		A01	1322088	1324356
A01	1369737	1370262		A01	2527680	2528258		A01	2085260	2092995		A01	1619229	1620017		A01	1327410	1329665
A01	1380077	1382439		A01	2565462	2568623		A01	2094486	2096193		A01	1627156	1629548		A01	1362684	1366973
A01	1383466	1386631		A01	2596990	2597765		A01	2105785	2107580		A01	1644484	1646939		A01	1369025	1370456
A01	1412888	1414895		A01	2604320	2605143		A01	2108684	2109210		A01	1654530	1656581		A01	1371586	1372563
A01	1417730	1418509		A01	2652051	2653116		A01	2124296	2125783		A01	1668893	1670122		A01	1381686	1382479
A01	1430932	1433198		A01	2689696	2690561		A01	2154897	2156362		A01	1682799	1684648		A01	1383510	1386792
A01	1436168	1437066		A01	2692239	2700806		A01	2254198	2258546		A01	1689094	1689626		A01	1417722	1418543
A01	1452655	1454666		A01	2711918	2719272		A01	2335090	2337901		A01	1695672	1696306		A01	1488622	1489192
A01	1488587	1489192		A01	2742687	2748414		A01	2340312	2343759		A01	1699109	1701464		A01	1547405	1548777
A01	1540237	1541848		A01	2754574	2765867		A01	2346231	2347894		A01	1706259	1706800		A01	1560337	1561288
A01	1547417	1551036		A01	2815898	2838400		A01	2349114	2350386		A01	1716522	1718878		A01	1564369	1565680
A01	1559673	1561659		A01	2843520	2859399		A01	2351645	2353405		A01	1741703	1743589		A01	1570490	1571579
A01	1568772	1571579		A01	2866426	2871141		A01	2354669	2356287		A01	1750816	1751205		A01	1619136	1620017
A01	1576164	1577747		A01	2887498	2891329		A01	2360858	2362720		A01	1752947	1753762		A01	1627180	1629530
A01	1580265	1581365		A01	2883534	2886247		A01	2358423	2359936		A01	1782993	1783912		A01	1638924	1639455
A01	1595811	1596951		A01	2946816	2949323		A01	2363804	2365382		A01	1837473	1837720		A01	1644176	1645298
A01	1601440	1602672		A01	2987525	2988178		A01	2366427	2368055		A01	1845727	1846578		A01	1654531	1655658
A01	1610730	1612167		A01	2990819	2991611		A01	2398238	2398665		A01	1867459	1867779		A01	1668874	1670041
A01	1627187	1629423		A01	3247283	3254782		A01	2406304	2409326		A01	1869276	1870880		A01	1682781	1684637
A01	1644487	1645268		A01	3258520	3261583		A01	2428143	2429152		A01	1872044	1874579		A01	1689081	1689626
A01	1650156	1651369		A01	3376621	3377545		A01	2439598	2447361		A01	1882340	1883482		A01	1695585	1696332
A01	1661093	1662184		A01	3425784	3426408		A01	2449388	2454963		A01	1891597	1893876		A01	1699595	1701005
A01	1668857	1671672		A01	3450658	3451596		A01	2455909	2458733		A01	1915115	1916165		A01	1706187	1706862
A01	1682767	1684652		A01	3480334	3484995		A01	2468037	2469503		A01	1959874	1960932		A01	1709103	1710302
A01	1704196	1706813		A01	3546758	3547319		A01	2472394	2475942		A01	2017590	2018264		A01	1716523	1718901
A01	1708660	1710284		A01	3587794	3593578		A01	2486434	2489470		A01	2037432	2039131		A01	1741715	1743201
A01	1711754	1718950		A01	3603368	3618142		A01	2505017	2506456		A01	2040665	2041334		A01	1750819	1751206
A01	1741728	1743611		A01	3642348	3649968		A01	2524201	2525516		A01	2046690	2047562		A01	1752884	1753649
A01	1775338	1775856		A01	3678231	3688330		A01	2527627	2529903		A01	2085266	2086059		A01	1782945	1783923
A01	1782993	1783923		A01	3693525	3697625		A01	2539017	2539674		A01	2094453	2095338		A01	1845595	1846591
A01	1837468	1838146		A01	3702064	3708075		A01	2577419	2582654		A01	2105776	2107593		A01	1869268	1874592
A01	1872085	1883525		A01	3715017	3725708		A01	2585484	2588774		A01	2108646	2109254		A01	1867457	1867826
A01	1891516	1896032		A01	3730504	3738083		A01	2596990	2601562		A01	2130409	2130991		A01	1882393	1883526
A01	1915227	1918104		A01	3743478	3748951		A01	2604233	2607870		A01	2155582	2156381		A01	1891569	1893921
A01	1955304	1960943		A01	3753276	3762658		A01	2638277	2640113		A01	2194636	2195128		A01	1915223	1915858
A01	1966218	1969957		A01	3776806	3781299		A01	2641672	2646304		A01	2236912	2237374		A01	1918018	1922464
A01	2017595	2018265		A01	3814464	3815138		A01	2652051	2653079		A01	2243186	2246068		A01	1950668	1951738
A01	2034327	2038013		A01	3857782	3867494		A01	2661381	2665292		A01	2247282	2247809		A01	1959990	1960931
A01	2039632	2041336		A01	3885247	3896923		A01	2683834	2690592		A01	2254240	2255138		A01	1966260	1968419
A01	2043923	2044431		A01	3913794	3918166		A01	2720391	2723379		A01	2319402	2319897		A01	1976077	1976927
A01	2046689	2050382		A01	3945703	3949235		A01	2728606	2730146		A01	2326345	2327068		A01	2007721	2009102
A01	2094468	2096251		A01	3965318	3995934		A01	2754615	2755812		A01	2328744	2330136		A01	2017596	2018274
A01	2100947	2101728		A01	4182432	4183537		A01	2804649	2805332		A01	2336871	2338050		A01	2020422	2020786
A01	2105772	2107596		A01	4246065	4248435		A01	2944029	2947607		A01	2345876	2347895		A01	2037419	2038007
A01	2108647	2109280		A01	4250044	4258949		A01	2948459	2950746		A01	2349182	2350379		A01	2040610	2041334
A01	2117604	2118516		A01	4414377	4419615		A01	2953324	2955668		A01	2351701	2353432		A01	2046661	2047546
A01	2130411	2131172		A01	4467990	4468930		A01	2973561	2974433		A01	2355144	2356986		A01	2085260	2086060
A01	2165968	2166421		A01	4521416	4546544		A01	2985616	2988162		A01	2358878	2359911		A01	2094436	2095222
A01	2181953	2186219		A01	4550047	4576732		A01	2990811	2994805		A01	2361375	2362711		A01	2105760	2107598
A01	2236907	2237469		A01	4581213	4591786		A01	3002977	3005763		A01	2363911	2365383		A01	2108651	2109233
A01	2244235	2246090		A01	4595009	4629237		A01	3277785	3283037		A01	2366857	2369138		A01	2130447	2131060
A01	2247281	2247755		A01	4634298	4648172		A01	3283994	3288671		A01	2377976	2378809		A01	2155503	2156407
A01	2254224	2256742		A01	4653181	4660906		A01	3355488	3357730		A01	2391843	2392590		A01	2166006	2166507
A01	2346604	2347894		A01	4706000	4710927		A01	3394226	3395040		A01	2398223	2398674		A01	2194555	2195146
A01	2349095	2350385		A01	4729524	4730159		A01	3409645	3410295		A01	2400422	2401481		A01	2236913	2237417
A01	2351683	2353447		A01	4756028	4759730		A01	3425754	3426447		A01	2406303	2407235		A01	2244178	2246110
A01	2354834	2356305		A01	4814326	4831716		A01	3447962	3451596		A01	2417308	2418345		A01	2247253	2247847
A01	2361396	2362721		A01	4843276	4844450		A01	3546679	3547423		A01	2428133	2429222		A01	2254216	2255278
A01	2363933	2365431		A01	4875353	4877567		A01	3602592	3604209		A01	2439591	2440852		A01	2319232	2320359
A01	2366522	2368049		A01	4895138	4896138		A01	3986804	3988424		A01	2447231	2450190		A01	2326197	2327055
A01	2398205	2398694		A01	4942523	4943192		A01	4106409	4109252		A01	2457916	2458761		A01	2328721	2330078
A01	2400468	2402664		A01	4953757	4971092		A01	4110082	4111486		A01	2467978	2469647		A01	2337249	2338050
A01	2417290	2419784		A01	5031007	5040590		A01	4181534	4183644		A01	2472373	2473476		A01	2342793	2343760
A01	2426610	2429218		A01	5045613	5054826		A01	4313851	4314713		A01	2486432	2489529		A01	2345899	2347899
A01	2449360	2450577		A01	5077132	5084341		A01	4400609	4405690		A01	2505016	2506468		A01	2349220	2350386
A01	2457904	2458780		A01	5112601	5122180		A01	4433890	4445266		A01	2509310	2512433		A01	2351695	2353434
A01	2467899	2469506		A01	5123759	5124468		A01	4467984	4471304		A01	2524092	2525630		A01	2355008	2357028
A01	2486443	2489218		A01	5129031	5137277		A01	4472527	4474692		A01	2527595	2530152		A01	2358941	2359912
A01	2505016	2506459		A01	5145586	5162487		A01	4704668	4707102		A01	2533298	2534631		A01	2361630	2362722
A01	2509311	2510022		A01	5173267	5174065		A01	4729443	4733565		A01	2538778	2539651		A01	2364230	2365385
A01	2511731	2512394		A01	5234941	5240444		A01	4744843	4748122		A01	2581806	2582655		A01	2366839	2369092
A01	2524241	2525603		A01	5275216	5275847		A01	4843298	4844442		A01	2587041	2588780		A01	2373519	2374474
A01	2527614	2529609		A01	5286570	5287208		A01	4886173	4888814		A01	2596972	2598012		A01	2377911	2378611
A01	2533405	2534661		A01	5288385	5301061		A01	4895095	4899284		A01	2603033	2605322		A01	2391747	2392609
A01	2537045	2539673		A01	5304011	5317614		A01	4915041	4915589		A01	2614923	2616160		A01	2398221	2398713
A01	2546925	2547751		A01	5855098	5871770		A01	4942443	4943204		A01	2636025	2636466		A01	2400410	2401522
A01	2566839	2567389		A01	5914169	5915740		A01	5077489	5078665		A01	2651642	2653063		A01	2406293	2407132
A01	2585344	2588801		A01	5962467	5972125		A01	5169770	5174139		A01	2689583	2690593		A01	2417289	2418168
A01	2604223	2607510		A01	5977412	5979338		A01	5227846	5230269		A01	2728572	2730699		A01	2428124	2429221
A01	2615116	2615894		A01	5981509	6005100		A01	5247588	5249394		A01	2754515	2756491		A01	2439637	2440796
A01	2636039	2636416		A01	6016559	6017032		A01	5271268	5275926		A01	2773141	2774222		A01	2448512	2449958
A01	2638276	2640235		A01	6024873	6025464		A01	5286481	5287224		A01	2804649	2805346		A01	2457940	2458768
A01	2641657	2644206		A01	6033431	6033930		A01	5327624	5332756		A01	2806451	2807633		A01	2467907	2469624
A01	2652009	2653121		A01	6099174	6112670		A01	5377054	5378165		A01	2852441	2854357		A01	2472359	2473428
A01	2683936	2690591		A01	6147550	6156495		A01	5396072	5396746		A01	2946688	2949546		A01	2486433	2487527
A01	2728555	2730736		A01	6440331	6454141		A01	5446857	5447534		A01	2953048	2955666		A01	2495444	2496091
A01	2740878	2742931		A01	6496988	6512126		A01	5751378	5751793		A01	2990810	2991715		A01	2504984	2506434
A01	2747644	2748393		A01	6529127	6542006		A01	5898032	5906458		A01	3038356	3039581		A01	2509289	2512459
A01	2754233	2756519		A01	6557334	6575664		A01	5914431	5917452		A01	3059942	3060323		A01	2524089	2525605
A01	2772966	2774285		A01	6638084	6638595		A01	5947296	5949080		A01	3166367	3167120		A01	2527614	2528826
A01	2790655	2792302		A01	6664008	6664784		A01	5976139	5980240		A01	3224540	3225205		A01	2533278	2534666
A01	2804648	2805368		A01	6728614	6730383		A01	6004298	6007503		A01	3282311	3285727		A01	2538986	2539660
A01	2806458	2807628		A01	6798828	6804370		A01	6022290	6025597		A01	3375032	3380246		A01	2546941	2547885
A01	2822945	2825094		A01	6822262	6827952		A01	6027980	6032263		A01	3394176	3395894		A01	2581708	2582657
A01	2830583	2833290		A01	6874078	6874839		A01	6033414	6038184		A01	3397912	3402466		A01	2587575	2588775
A01	2846163	2848405		A01	6885077	6885858		A01	6147492	6148202		A01	3409520	3410390		A01	2596962	2597979
A01	2852112	2854382		A01	6930026	6930650		A01	6346443	6347366		A01	3416012	3419049		A01	2603760	2605244
A01	2887530	2889589		A01	6951768	6960678		A01	6545216	6546741		A01	3425706	3426513		A01	2614942	2616165
A01	2917860	2920063		A01	7042013	7042605		A01	6550944	6556317		A01	3450510	3451665		A01	2636014	2636497
A01	2944074	2950747		A01	7128106	7130210		A01	6637983	6638623		A01	3467612	3468538		A01	2638261	2640171
A01	2953261	2955668		A01	7136012	7141342		A01	6718540	6721543		A01	3499922	3501916		A01	2651627	2653081
A01	2973571	2974430		A01	7143214	7155210		A01	6726621	6730296		A01	3546586	3547863		A01	2664038	2667025
A01	2985684	2988243		A01	7404423	7405632		A01	6874039	6876846		A01	3582910	3584147		A01	2673224	2674600
A01	2990772	2994535		A01	7417122	7417911		A01	6882746	6885864		A01	3603168	3604204		A01	2689527	2690593
A01	3038327	3039545		A01	7430123	7434149		A01	6897637	6899252		A01	3813638	3815142		A01	2722989	2723392
A01	3278011	3288543		A01	7451885	7452520		A01	6922052	6926536		A01	3986805	3987903		A01	2728569	2730698
A01	3308591	3310086		A01	7503399	7512547		A01	6927722	6930683		A01	4097532	4101779		A01	2754218	2756375
A01	3341064	3343319		A01	7572060	7572827		A01	7122339	7122750		A01	4106464	4107449		A01	2773141	2774231
A01	3355771	3357794		A01	7590642	7591855		A01	7128006	7131658		A01	4110062	4110762		A01	2804604	2805353
A01	3376623	3380011		A01	7593073	7596903		A01	7157438	7158699		A01	4182333	4183795		A01	2806481	2807636
A01	3394177	3395041		A01	7674006	7680124		A01	7190458	7196252		A01	4313811	4315557		A01	2852472	2854365
A01	3398805	3402212		A01	7702458	7707942		A01	7213327	7213901		A01	4317879	4318515		A01	2946454	2949815
A01	3409605	3410305		A01	7716748	7719311		A01	7216806	7218149		A01	4368226	4369205		A01	2953139	2955667
A01	3415964	3418363		A01	7844741	7850398		A01	7275268	7282371		A01	4381618	4383152		A01	2987525	2988252
A01	3425726	3426575		A01	7901715	7907682		A01	7304131	7310142		A01	4384216	4387974		A01	2990792	2991620
A01	3448337	3451714		A01	7978126	7979041		A01	7409632	7417909		A01	4389100	4389680		A01	3002879	3004207
A01	3482920	3484360		A01	7980242	7986334		A01	7419143	7426327		A01	4400603	4402210		A01	3038301	3039763
A01	3521059	3525659		A01	7993070	7995635		A01	7451822	7452519		A01	4435310	4437471		A01	3052022	3055290
A01	3529241	3530849		A01	8101449	8105649		A01	7520269	7520889		A01	4444223	4445292		A01	3059810	3060358
A01	3536125	3537075		A01	8150169	8153960		A01	7557767	7559439		A01	4467982	4468961		A01	3166217	3167120
A01	3546651	3547456		A01	8184425	8190610		A01	7560593	7562876		A01	4473624	4475978		A01	3224542	3225224
A01	3602950	3604197		A01	8283233	8284022		A01	7564527	7572802		A01	4488620	4491783		A01	3282311	3285104
A01	3647054	3648201		A01	8292819	8299459		A01	7591039	7591829		A01	4677222	4679628		A01	3340883	3343126
A01	3703980	3705093		A01	8400201	8407083		A01	7654511	7657031		A01	4705242	4708349		A01	3355276	3357989
A01	3719643	3720901		A01	8456472	8457528		A01	7761997	7770763		A01	4729444	4730471		A01	3375470	3380229
A01	3814083	3815153		A01	8480965	8486055		A01	7819574	7821647		A01	4843461	4844444		A01	3394156	3395834
A01	3986815	3988173		A01	8538230	8541806		A01	7844689	7845353		A01	4884786	4889142		A01	3397991	3402485
A01	4106386	4108011		A01	8612317	8612915		A01	7851790	7856207		A01	4895048	4896657		A01	3409506	3410404
A01	4110040	4110822		A01	8659385	8664012		A01	7974485	7979053		A01	4901313	4901764		A01	3416032	3418655
A01	4124352	4126474		A01	8673152	8673745		A01	8070924	8071586		A01	4913602	4915622		A01	3425687	3426578
A01	4159439	4160349		A01	8713844	8714486		A01	8105104	8107018		A01	4942328	4943235		A01	3450659	3451756
A01	4181778	4183647		A01	8718377	8718928		A01	8161483	8162512		A01	5077360	5078660		A01	3467590	3468627
A01	4230669	4231710		A01	8756922	8758220		A01	8283124	8286975		A01	5226177	5230270		A01	3495767	3497161
A01	4247651	4248417		A01	8768683	8771989		A01	8290853	8291820		A01	5247381	5249420		A01	3499815	3501692
A01	4252727	4255055		A01	8802386	8803018		A01	8310176	8312527		A01	5274792	5276168		A01	3521100	3525686
A01	4256919	4258693		A01	8894650	8897262		A01	8313443	8318729		A01	5286438	5287226		A01	3546594	3547892
A01	4313712	4315276		A01	8961590	8967869		A01	8612241	8613273		A01	5316958	5318422		A01	3580745	3581302
A01	4337347	4338563		A01	8980394	8985735		A01	8665262	8668425		A01	5331645	5332768		A01	3582770	3584189
A01	4381726	4387217		A01	9029381	9030094		A01	8670880	8673817		A01	5334043	5334374		A01	3602575	3604220
A01	4389089	4389710		A01	9038833	9039929		A01	8713782	8716994		A01	5377054	5378168		A01	3814110	3815133
A01	4439018	4445297		A01	9045961	9055201		A01	8718352	8720860		A01	5379360	5382136		A01	3986746	3988035
A01	4467981	4470964		A01	9061362	9062282		A01	8795325	8797598		A01	5396068	5396726		A01	4099506	4101723
A01	4489471	4491762		A01	9065463	9067345		A01	8800911	8803009		A01	5499287	5500221		A01	4106454	4107449
A01	4525649	4526447		A01	9132957	9143782		A01	8850610	8851184		A01	5510140	5510727		A01	4110013	4110812
A01	4843363	4844443		A01	9459883	9460649		A01	8888021	8888734		A01	5659463	5660662		A01	4164652	4165601
A01	4876317	4877106		A01	9684111	9694694		A01	9029324	9030139		A01	5747415	5748380		A01	4182319	4183696
A01	4886221	4889094		A01	9967429	9968185		A01	9038788	9042404		A01	5751336	5751972		A01	4313778	4315535
A01	4895047	4899259		A01	10057877	10063238		A01	9061326	9063626		A01	5802889	5806619		A01	4317920	4318587
A01	4901279	4901818		A01	10064574	10066334		A01	9065442	9066350		A01	5839398	5842081		A01	4368182	4369058
A01	4914145	4915751		A01	10087715	10091020		A01	9459844	9461684		A01	5896138	5900558		A01	4384358	4387237
A01	4942372	4943245		A01	10124771	10126181		A01	10065631	10067473		A01	5905249	5906466		A01	4389115	4389675
A01	4967596	4970666		A01	10171200	10175883		A01	10124867	10126214		A01	5914125	5916053		A01	4400595	4402046
A01	5032114	5033159		A01	10253028	10258671		A01	10213017	10215649		A01	5947276	5948974		A01	4405160	4407635
A01	5077383	5079130		A01	10350806	10351634		A01	10350809	10352889		A01	5965756	5966297		A01	4435219	4437461
A01	5170858	5174138		A01	10362185	10362942		A01	10362107	10365078		A01	5977169	5980377		A01	4444197	4445247
A01	5227172	5230280		A01	10394182	10395130		A01	10391390	10395152		A01	6004280	6005833		A01	4467962	4468977
A01	5247586	5249480		A01	10443659	10447517		A01	10440001	10441870		A01	6008684	6008956		A01	4473650	4474713
A01	5286437	5287238		A01	10449577	10454339		A01	10530032	10536389		A01	6016629	6017032		A01	4489442	4491763
A01	5296139	5296844		A01	10530086	10530869		A01	10554283	10558664		A01	6024571	6025602		A01	4677836	4679653
A01	5298890	5299600		A01	10537323	10538863		A01	10572830	10580563		A01	6027972	6028872		A01	4706052	4708298
A01	5305212	5306398		A01	10700485	10701192		A01	10699967	10701240		A01	6032569	6034092		A01	4729443	4730510
A01	5312389	5313168		A01	10781483	10793076		A01	10882318	10884355		A01	6147455	6148202		A01	4843457	4844444
A01	5328601	5332780		A01	10924637	10925113		A01	10924632	10926125		A01	6243731	6244486		A01	4886261	4888992
A01	5376940	5378166		A01	10930144	10930899		A01	10930141	10932830		A01	6290827	6292843		A01	4895019	4896259
A01	5379359	5381927		A01	10948075	10950608		A01	10948247	10949154		A01	6332064	6332649		A01	4901322	4901782
A01	5396031	5396757		A01	11005619	11006258		A01	11296822	11306941		A01	6539746	6540964		A01	4907176	4910126
A01	5446859	5447543		A01	11010349	11022282		A01	11423722	11428259		A01	6545201	6546698		A01	4913634	4915666
A01	5499313	5501235		A01	11117643	11118767		A01	11429108	11435840		A01	6585503	6588076		A01	4942340	4943235
A01	5659075	5660662		A01	11143744	11144506		A01	11475145	11477736		A01	6637344	6638642		A01	5013139	5015382
A01	5747596	5748350		A01	11152161	11155045		A01	11531185	11533187		A01	6645443	6646096		A01	5032116	5033078
A01	5751364	5751949		A01	11156547	11156854		A01	11534105	11537235		A01	6655002	6655380		A01	5077442	5078649
A01	5795399	5796533		A01	11306105	11306850		A01	11543304	11546781		A01	6663952	6664866		A01	5173204	5174139
A01	5802878	5805608		A01	11315902	11319008		A01	11556407	11560049		A01	6725445	6731156		A01	5228242	5230299
A01	5810007	5811429		A01	11338480	11344889		A01	11614644	11617938		A01	6786411	6789038		A01	5247380	5249464
A01	5839485	5841701		A01	11349105	11352387		A01	11621221	11623879		A01	6874018	6874868		A01	5275050	5275977
A01	5896295	5906497		A01	11356681	11360371		A01	11687089	11692051		A01	6885112	6885855		A01	5286437	5287229
A01	5914165	5917367		A01	11402585	11408981		A01	11694376	11697077		A01	6897227	6900614		A01	5316947	5317853
A01	5923748	5925050		A01	11434981	11435778		A01	11698897	11704869		A01	6916357	6919451		A01	5331557	5332781
A01	5937599	5939878		A01	11476795	11477628		A01	11718264	11722912		A01	6921125	6922736		A01	5334042	5334425
A01	5942953	5943386		A01	11516833	11517572		A01	11744611	11745449		A01	6924593	6926519		A01	5377069	5378169
A01	5947277	5949008		A01	11556406	11557274		A01	11823015	11825624		A01	6997863	6998513		A01	5379347	5381992
A01	5976006	5980058		A01	11583054	11587790		A01	11881386	11883985		A01	7041829	7042664		A01	5396030	5396753
A01	6004228	6007135		A01	11623124	11626025		A01	11948709	11950125		A01	7121920	7122887		A01	5446918	5447490
A01	6023468	6025612		A01	11659959	11665929		A01	12040610	12044940		A01	7127905	7133290		A01	5499307	5500264
A01	6027980	6032179		A01	11687331	11688060		A01	12121430	12122096		A01	7146315	7146691		A01	5510173	5510752
A01	6033368	6035353		A01	11694399	11695008		A01	12198623	12201437		A01	7189997	7197432		A01	5584832	5585530
A01	6147500	6148201		A01	11703952	11704853		A01	12203539	12205558		A01	7213275	7215591		A01	5659975	5660684
A01	6168148	6169798		A01	11720018	11720684		A01	12348273	12356274		A01	7216759	7218436		A01	5747545	5748379
A01	6243733	6244541		A01	11766227	11781450		A01	12369587	12373941		A01	7275191	7276141		A01	5751349	5751989
A01	6287696	6292850		A01	11793194	11803364		A01	12409665	12410949		A01	7278326	7280182		A01	5785428	5788274
A01	6346496	6348676		A01	11827888	11838739		A01	12447180	12452436		A01	7288724	7291482		A01	5795425	5796490
A01	6539676	6541436		A01	11847531	11848220		A01	12522552	12527127		A01	7306307	7308027		A01	5802851	5806547
A01	6545216	6546710		A01	11852941	11858019		A01	12552262	12558682		A01	7309148	7310127		A01	5810162	5811350
A01	6563409	6564312		A01	11881415	11882182		A01	12604161	12606234		A01	7404367	7405815		A01	5839524	5841715
A01	6600451	6601805		A01	11994251	12003092		A01	12611308	12613057		A01	7406699	7408453		A01	5867988	5868729
A01	6637297	6638668		A01	12044209	12044871		A01	12613974	12617762		A01	7416271	7417908		A01	5896242	5900446
A01	6645407	6646073		A01	12088552	12093239		A01	12621108	12622658		A01	7421257	7422621		A01	5905278	5906466
A01	6654612	6655351		A01	12107693	12120161		A01	12661827	12669553		A01	7451168	7452544		A01	5914114	5916050
A01	6713049	6713648		A01	12121453	12122078		A01	12711548	12715439		A01	7520227	7520916		A01	5917323	5920966
A01	6726528	6730391		A01	12137357	12139875		A01	12718023	12721193		A01	7571870	7572885		A01	5923786	5924994
A01	6778199	6778832		A01	12163270	12164142		A01	12778583	12784737		A01	7605075	7608735		A01	5947276	5948976
A01	6786433	6791081		A01	12198775	12200935		A01	12801639	12813864		A01	7654531	7661207		A01	5950342	5951127
A01	6800326	6801602		A01	12207099	12208819		A01	12825702	12826729		A01	7668948	7670441		A01	5965765	5966311
A01	6824118	6825353		A01	12211213	12217567		A01	12844159	12845911		A01	7681717	7682326		A01	5977072	5979645
A01	6869788	6871474		A01	12264729	12267821		A01	12862342	12866810		A01	7718239	7719378		A01	6004265	6005970
A01	6873991	6876487		A01	12269669	12277298		A01	12944388	12946891		A01	7731792	7733352		A01	6016638	6017002
A01	6896158	6903864		A01	12352075	12354041		A01	13213996	13215772		A01	7762062	7763132		A01	6024627	6025612
A01	6922502	6926536		A01	12375401	12376016		A01	13394102	13395894		A01	7808661	7810370		A01	6027983	6028905
A01	6927799	6930737		A01	12382476	12386460		A01	13416038	13418969		A01	7819606	7821817		A01	6033265	6034075
A01	6997853	6998559		A01	12526460	12527179		A01	13437240	13438411		A01	7832803	7836970		A01	6147436	6148202
A01	7003575	7003928		A01	12612377	12613055		A01	13588299	13590226		A01	7843743	7845379		A01	6243694	6244607
A01	7041561	7042616		A01	12621747	12622607		A01	13618036	13622319		A01	7864428	7864992		A01	6290635	6292688
A01	7050909	7055794		A01	12680281	12682879		A01	13683064	13686512		A01	7978043	7979067		A01	6332089	6332647
A01	7122210	7122858		A01	12711549	12712582		A01	13712060	13726357		A01	8070895	8071707		A01	6346536	6348620
A01	7127933	7131541		A01	12812879	12813813		A01	13741468	13742615		A01	8110389	8111502		A01	6459455	6459847
A01	7157405	7158742		A01	12844162	12844665		A01	13800173	13801169		A01	8161342	8162509		A01	6539748	6540950
A01	7179603	7180853		A01	12866202	12866805		A01	13849322	13850481		A01	8283170	8284908		A01	6545204	6546565
A01	7190297	7196150		A01	12944438	12945433		A01	13889567	13897380		A01	8290839	8291723		A01	6586005	6587061
A01	7213333	7214993		A01	12974519	12974981		A01	13951868	13954293		A01	8317118	8318700		A01	6637270	6638675
A01	7216777	7218368		A01	13394851	13395836		A01	13988867	13991469		A01	8448138	8450125		A01	6645392	6646095
A01	7237120	7237939		A01	13418172	13418934		A01	13994142	13998546		A01	8456449	8457890		A01	6654873	6655380
A01	7288648	7290711		A01	13437301	13438423		A01	14006498	14011669		A01	8555092	8558403		A01	6663890	6664837
A01	7304368	7310144		A01	13525432	13528325		A01	14018470	14020767		A01	8575259	8576002		A01	6724795	6731162
A01	7314756	7315968		A01	13618059	13618880		A01	14061332	14064493		A01	8577306	8579964		A01	6786400	6788445
A01	7404294	7405737		A01	13685859	13686483		A01	14106842	14108996		A01	8611330	8613410		A01	6874004	6874976
A01	7410186	7417919		A01	13711979	13712716		A01	14202146	14204829		A01	8628018	8629006		A01	6885118	6885867
A01	7419600	7426336		A01	13737438	13742542		A01	14216292	14220606		A01	8665110	8670128		A01	6897408	6900238
A01	7451660	7452543		A01	13849381	13850285		A01	14544986	14546534		A01	8672584	8673824		A01	6903199	6903875
A01	7455530	7457474		A01	13953287	13954238		A01	14629009	14630186		A01	8690389	8691732		A01	6918369	6919495
A01	7503347	7505994		A01	13990729	13991426		A01	14707082	14709351		A01	8713793	8714926		A01	6921125	6922744
A01	7520218	7520980		A01	13998048	13998533		A01	14711526	14720347		A01	8717750	8719478		A01	6924916	6926538
A01	7590676	7591832		A01	14006543	14007207		A01	15402487	15413676		A01	8773160	8773982		A01	6930020	6930699
A01	7596033	7596731		A01	14018556	14019042		A01	15574621	15575448		A01	8786688	8787150		A01	6997852	6998547
A01	7605140	7609217		A01	14033937	14040788		A01	15693507	15694157		A01	8802219	8803432		A01	7041759	7042691
A01	7654494	7657260		A01	14061338	14061965		A01	15849997	15856952		A01	8850569	8865985		A01	7053592	7054786
A01	7658461	7659520		A01	14120759	14123072		A01	15893044	15894204		A01	8869334	8871860		A01	7121931	7122921
A01	7668857	7670446		A01	14204082	14204803		A01	16361642	16371789		A01	8875726	8878741		A01	7127324	7133343
A01	7681727	7682307		A01	14216303	14217019		A01	16410661	16412943		A01	8887941	8890383		A01	7157421	7158284
A01	7703608	7705826		A01	14222733	14229448		A01	16659641	16660366		A01	8896534	8897092		A01	7190017	7190911
A01	7718167	7719388		A01	14536537	14546456		A01	16667505	16668062		A01	9029273	9030163		A01	7191930	7197436
A01	7732096	7733141		A01	14628780	14630145		A01	16792943	16794940		A01	9038781	9040111		A01	7213268	7215141
A01	7757436	7758904		A01	14708493	14709357		A01	16822955	16824998		A01	9061262	9063717		A01	7216747	7218395
A01	7772058	7773494		A01	14718859	14720290		A01	16833284	16834113		A01	9065191	9067232		A01	7241106	7242443
A01	7819559	7822061		A01	14859377	14874563		A01	17062420	17064395		A01	9397954	9399243		A01	7275192	7276030
A01	7841710	7842390		A01	15301335	15314939		A01	17121136	17144998		A01	9455746	9457750		A01	7278348	7279786
A01	7844677	7845388		A01	15384892	15395830		A01	17261805	17273206		A01	9459860	9460669		A01	7288664	7290784
A01	7863416	7864989		A01	15502619	15522377		A01	17407245	17432379		A01	9642919	9644695		A01	7306328	7307609
A01	7891297	7895297		A01	15574684	15575426		A01	17537336	17539712		A01	9660669	9661664		A01	7309200	7310128
A01	7974882	7979047		A01	15775308	15781258		A01	17649370	17655812		A01	9967344	9968247		A01	7404351	7405745
A01	8070941	8071618		A01	15785850	15786313		A01	17777276	17807727		A01	10043426	10043722		A01	7407056	7408459
A01	8097452	8099205		A01	15799461	15803224		A01	17855725	17857588		A01	10065585	10068894		A01	7416906	7417938
A01	8105072	8107553		A01	15850089	15850911		A01	17930737	17936023		A01	10138697	10139111		A01	7421226	7422759
A01	8110369	8113264		A01	15953739	15959709		A01	17952271	17955592		A01	10203545	10204243		A01	7425802	7426327
A01	8151269	8153217		A01	16370851	16371751		A01	18003143	18014752		A01	10213008	10215615		A01	7451516	7452567
A01	8161164	8162580		A01	16382491	16389940		A01	18153824	18159316		A01	10362106	10362893		A01	7520200	7520923
A01	8185659	8189049		A01	16401786	16402661		A01	18231353	18233805		A01	10394113	10395144		A01	7557738	7559056
A01	8224447	8227767		A01	16541861	16550527		A01	18255727	18263069		A01	10406861	10407080		A01	7571815	7572889
A01	8254107	8256233		A01	16659705	16660276		A01	18265759	18271913		A01	10439362	10441934		A01	7580021	7582725
A01	8281049	8282114		A01	16750203	16756808		A01	18435010	18441290		A01	10491026	10491740		A01	7591020	7593631
A01	8283166	8286429		A01	16758573	16772516		A01	18442519	18445433		A01	10507410	10508177		A01	7605061	7609017
A01	8290789	8291841		A01	16793885	16794829		A01	18485657	18487748		A01	10530023	10536402		A01	7654527	7661114
A01	8310135	8311799		A01	16823738	16824954		A01	18496140	18497981		A01	10557831	10558680		A01	7668888	7670452
A01	8314787	8318737		A01	16909497	16911417		A01	18534649	18537957		A01	10653034	10656109		A01	7681725	7682326
A01	8373178	8373696		A01	17062454	17063187		A01	18539943	18540999		A01	10692517	10693810		A01	7703625	7705458
A01	8456460	8457631		A01	17128464	17130236		A01	18646758	18652052		A01	10699477	10701240		A01	7718211	7719378
A01	8538312	8539915		A01	17272321	17273022		A01	18686545	18691121		A01	10882378	10885952		A01	7731777	7733422
A01	8612198	8613388		A01	17332776	17335729		A01	18706626	18710020		A01	10924574	10931656		A01	7761994	7763171
A01	8628033	8629018		A01	17365134	17371874		A01	18726996	18735501		A01	10997432	10998449		A01	7770459	7773460
A01	8665155	8668473		A01	17431486	17432289		A01	18748613	18750504		A01	11005540	11006144		A01	7808624	7810384
A01	8670932	8673817		A01	17537461	17538074		A01	18752823	18756739		A01	11304771	11306956		A01	7819571	7821890
A01	8675447	8676837		A01	17654795	17655744		A01	18833692	18842790		A01	11405451	11406042		A01	7834279	7836928
A01	8679573	8682140		A01	17806965	17807712		A01	18851292	18852495		A01	11434946	11435825		A01	7843689	7845379
A01	8690516	8691756		A01	17855792	17856607		A01	18874322	18880870		A01	11465651	11466036		A01	7978159	7979088
A01	8713773	8716952		A01	17909785	17912765		A01	18942497	18944917		A01	11475196	11477756		A01	8068828	8071732
A01	8718377	8720296		A01	17930777	17931461		A01	19028533	19031683		A01	11496016	11497233		A01	8097316	8099393
A01	8770614	8771865		A01	17952360	17953417		A01	19146990	19149995		A01	11509885	11510755		A01	8105078	8108700
A01	8795270	8797188		A01	18013823	18014619		A01	19251233	19258328		A01	11531174	11538184		A01	8110364	8111097
A01	8819417	8834276		A01	18057887	18062265		A01	19260379	19264568		A01	11543303	11544658		A01	8161343	8162512
A01	8850494	8851194		A01	18071776	18073745		A01	19266389	19271881		A01	11556387	11557446		A01	8224498	8225293
A01	8887941	8888759		A01	18158222	18159237		A01	19284875	19291872		A01	11597994	11598481		A01	8235345	8236784
A01	8896168	8897106		A01	18255691	18256530		A01	19325940	19331494		A01	11614476	11615997		A01	8253967	8256230
A01	8983224	8984725		A01	18265843	18267374		A01	19421520	19433216		A01	11686971	11688431		A01	8281023	8282019
A01	9029307	9030147		A01	18433286	18436524		A01	19451840	19465084		A01	11690217	11695374		A01	8283150	8284766
A01	9038788	9042421		A01	18485702	18486361		A01	19582531	19585297		A01	11702838	11704874		A01	8290769	8291693
A01	9049369	9051865		A01	18489261	18495079		A01	19587479	19591452		A01	11719717	11721261		A01	8310150	8311031
A01	9061328	9062988		A01	18650869	18651994		A01	19718096	19719738		A01	11744464	11745421		A01	8317094	8318726
A01	9065291	9066351		A01	18679352	18684600		A01	19839227	19841946		A01	11847513	11848380		A01	8379720	8381066
A01	9137183	9137599		A01	18706667	18707430		A01	19872872	19888323		A01	11881387	11882089		A01	8448140	8450129
A01	9209993	9213790		A01	18724974	18729061		A01	20001765	20006173		A01	11927610	11928420		A01	8456452	8459282
A01	9237603	9241567		A01	18734881	18735415		A01	20271003	20274791		A01	11949249	11950139		A01	8555051	8558334
A01	9317895	9321340		A01	18748753	18749541		A01	20337227	20341158		A01	11964122	11965797		A01	8570529	8571587
A01	9397878	9402302		A01	18755539	18756344		A01	20348933	20350525		A01	11970186	11971114		A01	8577337	8579966
A01	9455797	9457743		A01	18841744	18842744		A01	20400247	20407754		A01	12044174	12044944		A01	8611287	8613423
A01	9459867	9461707		A01	18851401	18852336		A01	20471159	20473246		A01	12121405	12122110		A01	8628032	8628898
A01	9537518	9538685		A01	18999068	19006397		A01	20486937	20489222		A01	12133474	12134212		A01	8665091	8669990
A01	9643257	9644697		A01	19021713	19026245		A01	20496602	20498077		A01	12197474	12202451		A01	8672682	8673814
A01	9688496	9690994		A01	19028525	19029701		A01	20616980	20620796		A01	12234151	12234700		A01	8690381	8691731
A01	9825604	9829197		A01	19149303	19149965		A01	20652573	20653298		A01	12271830	12274423		A01	8713786	8714664
A01	9967358	9968268		A01	19247920	19250311		A01	20687338	20689718		A01	12323420	12327966		A01	8718332	8719414
A01	9973822	9974530		A01	19255659	19257061		A01	20776604	20779193		A01	12347246	12354215		A01	8773148	8773941
A01	10010420	10012462		A01	19260397	19261129		A01	20794582	20805447		A01	12409536	12410869		A01	8786625	8787191
A01	10065515	10068926		A01	19269186	19271552		A01	20940188	20946216		A01	12504739	12508142		A01	8795265	8796135
A01	10089631	10090192		A01	19325967	19326812		A01	20979279	20982485		A01	12517463	12517936		A01	8802208	8803301
A01	10124862	10126226		A01	19370727	19375572		A01	21110815	21112483		A01	12558373	12561634		A01	8819369	8820860
A01	10138664	10139431		A01	19423167	19423705		A01	21352082	21353255		A01	12611615	12617785		A01	8827872	8831727
A01	10173986	10174822		A01	19432222	19433142		A01	21520807	21522816		A01	12621013	12622675		A01	8850317	8865963
A01	10203572	10204236		A01	19451875	19452711		A01	21526317	21526968		A01	12661805	12671296		A01	8869408	8871836
A01	10213006	10215775		A01	19567628	19572892		A01	21633397	21634155		A01	12727197	12730657		A01	8875805	8878763
A01	10290516	10292258		A01	19590340	19591352		A01	21642960	21643698		A01	12760167	12765089		A01	8887876	8890375
A01	10362107	10363049		A01	19707921	19714932		A01	21816890	21819297		A01	12778556	12780988		A01	8896293	8897115
A01	10392090	10395144		A01	19742653	19746876		A01	21938583	21943279		A01	12796578	12802005		A01	9029298	9030209
A01	10439835	10442090		A01	19764415	19766342		A01	21960633	21965455		A01	12812880	12813857		A01	9038773	9039840
A01	10444179	10444772		A01	19872873	19873673		A01	22113010	22115569		A01	12822885	12824120		A01	9061260	9067252
A01	10507438	10508088		A01	20005158	20006091		A01	22249437	22253886		A01	12825637	12826726		A01	9068231	9069683
A01	10537997	10538645		A01	20193045	20202580		A01	22904572	22911855		A01	12844151	12844629		A01	9195875	9197212
A01	10530035	10536161		A01	20269056	20271608		A01	23037047	23039936		A01	12879053	12880769		A01	9375547	9377653
A01	10554355	10559103		A01	20409397	20412602		A01	23040813	23043369		A01	12944417	12945416		A01	9397953	9399204
A01	10584727	10585389		A01	20471162	20472024		A01	23167982	23170947		A01	12974377	12977251		A01	9455724	9457570
A01	10653036	10655929		A01	20487021	20487885		A01	23338960	23339846		A01	13213964	13215795		A01	9459849	9460670
A01	10700254	10701242		A01	20617022	20617901		A01	23340722	23341698		A01	13393771	13395866		A01	9537607	9538531
A01	10749156	10749979		A01	20687460	20688117		A01	23491897	23492420		A01	13409287	13414045		A01	9642954	9644714
A01	10882318	10885902		A01	20699099	20702862		A01	23502586	23504978		A01	13417967	13418967		A01	9660707	9661852
A01	10924553	10925834		A01	20807913	20813306		A01	23506043	23509042		A01	13431424	13433516		A01	9721846	9722774
A01	10930138	10932762		A01	20815376	20816451		A01	24232007	24239700		A01	13437246	13442090		A01	9825712	9826457
A01	10944135	10945618		A01	20898400	20908743		A01	24265652	24267146		A01	13527521	13528362		A01	9967352	9968241
A01	10948092	10950797		A01	20979351	20980134		A01	24281879	24285359		A01	13530539	13531145		A01	9973822	9974526
A01	10997494	11000189		A01	21003111	21004801		A01	24404981	24412189		A01	13532599	13541885		A01	10010433	10012779
A01	11001632	11002625		A01	21250966	21255846		A01	24443442	24450884		A01	13587084	13590356		A01	10065546	10068570
A01	11012998	11014018		A01	21352486	21353156		A01	24669639	24677761		A01	13618028	13618678		A01	10089663	10090120
A01	11227504	11234981		A01	21520861	21521691		A01	24738389	24740845		A01	13685667	13686541		A01	10124962	10126203
A01	11282221	11283397		A01	21528792	21530819		A01	24766033	24771651		A01	13699970	13701551		A01	10138688	10139787
A01	11296714	11297913		A01	21822725	21823441		A01	24958974	24960786		A01	13703642	13704238		A01	10174064	10174653
A01	11299145	11304097		A01	21888423	21891534		A01	24970975	24974496		A01	13738689	13742616		A01	10203510	10204261
A01	11305597	11306956		A01	21942550	21943255		A01	24975338	24979646		A01	13749525	13750285		A01	10213008	10215549
A01	11315977	11317930		A01	21962679	21963260		A01	25000595	25002772		A01	13799224	13801219		A01	10286633	10288371
A01	11350835	11352387		A01	22270137	22282072		A01	25004342	25007342		A01	13849298	13851891		A01	10349409	10351663
A01	11403760	11406046		A01	22786455	22795780		A01	25031733	25032789		A01	13951466	13954967		A01	10362106	10362921
A01	11419992	11421209		A01	22904590	22905361		A01	25034230	25036319		A01	13985487	13989042		A01	10394136	10395169
A01	11429227	11435875		A01	22999451	23003177		A01	25038570	25039766		A01	13990017	13991464		A01	10435725	10442079
A01	11475894	11477761		A01	23030507	23033259		A01	25046366	25050806		A01	13998016	13998533		A01	10444165	10444792
A01	11490091	11491793		A01	23039065	23039850		A01	25308363	25310683		A01	14006489	14007304		A01	10490990	10491743
A01	11514309	11517659		A01	23042212	23043324		A01	25319520	25322424		A01	14018465	14019398		A01	10507380	10508220
A01	11543280	11546626		A01	23156052	23161839		A01	25350023	25350877		A01	14043610	14044652		A01	10530015	10536462
A01	11553660	11560039		A01	23170074	23170923		A01	25520493	25525681		A01	14048135	14050119		A01	10557804	10559095
A01	11580051	11587370		A01	23338962	23339800		A01	25527371	25528706		A01	14061306	14062741		A01	10653031	10656048
A01	11614468	11617903		A01	23508204	23508975		A01	25534788	25538526		A01	14063731	14072538		A01	10692429	10693819
A01	11621249	11626668		A01	23844697	23846995		A01	25544483	25546520		A01	14106762	14108948		A01	10699669	10701243
A01	11687036	11689813		A01	24265694	24266409		A01	25589781	25591945		A01	14203159	14204876		A01	10749283	10750858
A01	11691040	11692555		A01	24281922	24282546		A01	25609875	25610678		A01	14216337	14216969		A01	10816684	10817644
A01	11694353	11696814		A01	24405223	24406122		A01	25614063	25619263		A01	14261120	14262396		A01	10882327	10885920
A01	11699024	11704871		A01	24443465	24444128		A01	25983135	25984111		A01	14399022	14399743		A01	10915770	10917013
A01	11723967	11725337		A01	24669665	24670352		A01	26013613	26016205		A01	14536690	14537479		A01	10924551	10926312
A01	11744472	11745472		A01	24738422	24739134		A01	26017111	26020749		A01	14539842	14546557		A01	10927456	10931668
A01	11797266	11799876		A01	24743146	24743632		A01	26197771	26198893		A01	14628591	14630218		A01	10948229	10950529
A01	11813275	11813823		A01	24766116	24766718		A01	26219100	26221285		A01	14706671	14709360		A01	10997450	10998694
A01	11822989	11825518		A01	24898425	24899419		A01	26510509	26512864		A01	14711075	14712209		A01	11005536	11006257
A01	11834709	11836124		A01	24959730	24960597		A01	26897256	26905381		A01	14718744	14720366		A01	11228369	11231498
A01	11881359	11883902		A01	24971017	24971786		A01	27300670	27301690		A01	14844192	14844844		A01	11300557	11303367
A01	11948822	11950169		A01	25000666	25001637		A01	27635500	27639284		A01	14848678	14850414		A01	11305073	11306956
A01	11952336	11953805		A01	25031731	25032374		A01	29048834	29053848		A01	15399116	15401048		A01	11351690	11352394
A01	11997058	11998526		A01	25034236	25035433		A01	29457801	29462152		A01	15411258	15413623		A01	11405164	11406043
A01	12042596	12044934		A01	25042853	25044682		A01	29532852	29533265		A01	15494155	15494828		A01	11419178	11421170
A01	12090959	12091611		A01	25107882	25111894		A01	30103222	30105296		A01	15574566	15575478		A01	11423579	11424082
A01	12117334	12118384		A01	25287538	25290386		A01	30759693	30768508		A01	15785526	15786396		A01	11434977	11435879
A01	12121404	12122146		A01	25321560	25322355		A01	31052478	31052867		A01	15849163	15850907		A01	11475820	11477749
A01	12163284	12164165		A01	25349876	25350906		A01	31054665	31058603		A01	15856851	15858355		A01	11496354	11497316
A01	12198430	12201434		A01	25508615	25512942		A01	31077856	31078714		A01	15878997	15880206		A01	11509894	11510728
A01	12203547	12205423		A01	25524821	25525663		A01	31291663	31301961		A01	15893059	15894342		A01	11516528	11517738
A01	12207218	12208197		A01	25527378	25528314		A01	31443439	31446329		A01	16369933	16372386		A01	11531164	11532151
A01	12214846	12216434		A01	25537811	25538467		A01	31683266	31688870		A01	16408028	16414021		A01	11534064	11534908
A01	12234151	12234683		A01	25545675	25546486		A01	31734894	31737430		A01	16447532	16447985		A01	11536144	11537337
A01	12266207	12267904		A01	25614079	25614867		A01	31741037	31762691		A01	16512128	16512676		A01	11543280	11544210
A01	12271834	12275847		A01	26020085	26020709		A01	31784898	31787265		A01	16636826	16637236		A01	11553572	11555367
A01	12348272	12349734		A01	26219172	26220082		A01	31830434	31831316		A01	16659545	16660387		A01	11556393	11557357
A01	12350921	12356064		A01	26276211	26281286		A01	31844627	31847760		A01	16667486	16668102		A01	11577536	11578672
A01	12359704	12361065		A01	26474650	26477635		A01	32008041	32008685		A01	16707765	16708442		A01	11597918	11598481
A01	12383143	12383947		A01	26510516	26511687		A01	32036104	32037190		A01	16756268	16756742		A01	11614371	11615476
A01	12409646	12411142		A01	26664974	26668613		A01	32100407	32102265		A01	16764795	16765699		A01	11621942	11624520
A01	12447133	12449142		A01	26888513	26895530		A01	32621971	32626942		A01	16789693	16792891		A01	11671784	11672390
A01	12504488	12506214		A01	26907973	26910559		A01	32633546	32635954		A01	16794130	16794901		A01	11686817	11688525
A01	12560682	12561623		A01	26952461	26958000		A01	32846469	32849414		A01	16820621	16824999		A01	11690587	11695221
A01	12599497	12601011		A01	27170518	27178250		A01	32911301	32920764		A01	16833028	16834266		A01	11702987	11704862
A01	12604106	12606847		A01	27300356	27304241		A01	32922091	32927802		A01	16869571	16870968		A01	11719729	11721390
A01	12611422	12617764		A01	27635527	27636304		A01	33089416	33091919		A01	17024691	17025350		A01	11744489	11745450
A01	12621211	12622666		A01	28279822	28283524		A01	34193741	34199239		A01	17062375	17066540		A01	11761220	11762417
A01	12661778	12669585		A01	28631103	28642628		A01	34252378	34254358		A01	17128335	17130220		A01	11813269	11813788
A01	12673678	12676524		A01	28750348	28753459		A01	34947443	34954980		A01	17255971	17256676		A01	11823002	11828589
A01	12677910	12682747		A01	29048868	29049674		A01	36044014	36045641		A01	17272118	17273239		A01	11847519	11848355
A01	12716983	12721465		A01	29461477	29462134		A01	36428569	36432507		A01	17277550	17277914		A01	11852266	11853565
A01	12724691	12730577		A01	29532741	29533281		A01	36471218	36472536		A01	17431486	17432378		A01	11881377	11882124
A01	12760131	12764312		A01	30103230	30103978		A01	37279052	37281074		A01	17537328	17539943		A01	11927678	11928419
A01	12778587	12784644		A01	30753433	30756674		A01	37367326	37367884		A01	17654755	17655803		A01	11949308	11950162
A01	12796645	12799793		A01	30766673	30767434		A01	37720783	37731490		A01	17774976	17777468		A01	11970001	11970954
A01	12817186	12818814		A01	30923971	30924792		A01	37797863	37799864		A01	17807174	17807726		A01	12044087	12044944
A01	12825638	12826739		A01	31077858	31078593		A01	37872338	37881138		A01	17855730	17859159		A01	12121377	12122214
A01	12844118	12845961		A01	31180935	31183767		A01	38424454	38425678		A01	17875086	17878525		A01	12133441	12134238
A01	12849933	12851566		A01	31203412	31205298		A01	38470844	38471522		A01	17930728	17931680		A01	12197880	12202400
A01	12944409	12946685		A01	31445508	31446321		A01	39094623	39097056		A01	17952307	17953879		A01	12203539	12205224
A01	12974396	12977031		A01	31587506	31596238		A01	39130190	39149833		A01	18002343	18003347		A01	12234137	12234701
A01	13213907	13215791		A01	31683276	31684182		A01	39154266	39156595		A01	18013813	18014897		A01	12267082	12268122
A01	13394412	13395867		A01	31734973	31735908		A01	39272023	39272718		A01	18044596	18045980		A01	12271834	12275823
A01	13405972	13406424		A01	31761853	31762706		A01	39358974	39361593		A01	18049450	18050072		A01	12323518	12327375
A01	13409306	13414048		A01	31785048	31785874		A01	39431819	39433543		A01	18059002	18059394		A01	12338984	12339726
A01	13415991	13419007		A01	31847080	31847742		A01	39435861	39437460		A01	18071879	18072858		A01	12347253	12354023
A01	13437233	13438872		A01	32006863	32008754		A01	39543316	39545041		A01	18157655	18159483		A01	12369577	12370734
A01	13440057	13442101		A01	32622055	32622935		A01	39747400	39750750		A01	18165494	18167420		A01	12375313	12376128
A01	13506650	13507393		A01	32719503	32726125		A01	39876337	39880559		A01	18255635	18256673		A01	12409606	12411055
A01	13527490	13528327		A01	32846508	32847148		A01	39885272	39888521		A01	18262855	18267463		A01	12447147	12449618
A01	13530421	13531193		A01	32922219	32922944		A01	40076569	40080609		A01	18297115	18298138		A01	12501338	12502374
A01	13535440	13541866		A01	33520410	33526005		A01	40122808	40123731		A01	18433286	18436986		A01	12517202	12517936
A01	13588224	13590281		A01	34170680	34177251		A01	40139568	40142298		A01	18440676	18445426		A01	12525994	12527183
A01	13617996	13620691		A01	34198426	34199184		A01	40144104	40148629		A01	18484697	18487748		A01	12535850	12537174
A01	13670933	13671997		A01	34947518	34948336		A01	40258515	40269218		A01	18528324	18529188		A01	12552084	12553581
A01	13683277	13686541		A01	37129353	37133312		A01	40287158	40294339		A01	18534650	18541060		A01	12558349	12561623
A01	13703604	13704200		A01	37720851	37721816		A01	40426203	40429278		A01	18645608	18652062		A01	12604107	12605321
A01	13738642	13742650		A01	37766968	37769347		A01	40724565	40725250		A01	18686535	18691716		A01	12611579	12617807
A01	13773044	13776487		A01	37798961	37799793		A01	40748708	40763903		A01	18706546	18707582		A01	12621117	12622683
A01	13800131	13801268		A01	37878370	37879020		A01	41054584	41055180		A01	18734679	18735468		A01	12666232	12671340
A01	13810838	13811359		A01	38030565	38031746		A01	41058917	41062754		A01	18748650	18749868		A01	12661733	12665267
A01	13849323	13850517		A01	38344152	38344724		A01	41279455	41281665		A01	18755257	18756997		A01	12673177	12676534
A01	13863240	13863863		A01	38424733	38425623		A01	41286688	41288844		A01	18850479	18852519		A01	12709172	12713825
A01	13884957	13892017		A01	38470989	38471523		A01	41382518	41384630		A01	18870905	18871395		A01	12715104	12721584
A01	13951944	13954312		A01	39084904	39085585		A01	41386825	41388687		A01	18879635	18880965		A01	12727376	12730684
A01	13988860	13991480		A01	39130227	39131157		A01	41393685	41399810		A01	18912661	18913707		A01	12760133	12765103
A01	13994448	13998554		A01	39359006	39359827		A01	41641226	41643913		A01	18942479	18947984		A01	12778478	12781004
A01	14006466	14011386		A01	39749728	39750705		A01	41670255	41674261		A01	18969608	18969972		A01	12796807	12803110
A01	14018468	14020600		A01	39876335	39876952		A01	41765020	41766873		A01	18970857	18971178		A01	12812881	12813871
A01	14040838	14042464		A01	39946332	39949780		A01	42470683	42473976		A01	19027001	19032880		A01	12817025	12818713
A01	14054546	14056685		A01	40076701	40077365		A01	42535145	42537427		A01	19122571	19124521		A01	12825637	12826728
A01	14058374	14059913		A01	40122518	40123731		A01	42874871	42877987		A01	19146204	19150008		A01	12844150	12844619
A01	14061318	14064472		A01	40141467	40142287		A01	45387862	45388604		A01	19242337	19242808		A01	12850096	12851580
A01	14068369	14071952		A01	40147366	40148610		A01	45549831	45550282		A01	19247778	19249238		A01	12866035	12866827
A01	14106822	14108674		A01	40281307	40287716		A01	45758308	45762790		A01	19253851	19258295		A01	12944409	12945356
A01	14121923	14122816		A01	40293547	40294330		A01	45819189	45820940		A01	19260174	19261152		A01	12974363	12977156
A01	14198369	14200623		A01	40426203	40426975		A01	45952351	45956178		A01	19268880	19272502		A01	13213996	13215802
A01	14202065	14204876		A01	40724563	40725180		A01	46185413	46188920		A01	19282558	19283936		A01	13394261	13395889
A01	14216266	14219601		A01	40870925	40880330		A01	46233330	46235096		A01	19284876	19286742		A01	13409309	13410259
A01	14225874	14226977		A01	41049461	41053040		A01	46246538	46247627		A01	19325945	19326942		A01	13411575	13414078
A01	14258594	14262462		A01	41062175	41062705		A01	46250349	46253625		A01	19421341	19423764		A01	13417978	13419000
A01	14399024	14399630		A01	41280860	41281557		A01	46583790	46585900		A01	19432030	19433219		A01	13431889	13433548
A01	14536645	14537439		A01	41288112	41288833		A01	46925612	46928062		A01	19451872	19453267		A01	13437201	13442108
A01	14541097	14546567		A01	41386840	41387645		A01	46932545	46933466		A01	19513498	19514398		A01	13527523	13528815
A01	14628640	14630217		A01	41398888	41399809		A01	47027581	47028953		A01	19556035	19556829		A01	13530584	13531129
A01	14707822	14709351		A01	41475672	41476486		A01	47219004	47226484		A01	19583373	19587673		A01	13532563	13541875
A01	14711534	14720365		A01	41643037	41643891		A01	47228008	47229720		A01	19590248	19591658		A01	13588206	13590377
A01	14844177	14844873		A01	41670261	41671199		A01	47430364	47436389		A01	19717462	19719820		A01	13618028	13618912
A01	14849284	14851973		A01	42535205	42536154		A01	48205691	48206777		A01	19831627	19839564		A01	13685629	13686540
A01	15410672	15413630		A01	42874858	42876089		A01	48213076	48214444		A01	19841240	19841947		A01	13699757	13701576
A01	15478381	15479096		A01	43922706	43926724		A01	48254526	48256850		A01	19872873	19873804		A01	13703559	13704203
A01	15494276	15494765		A01	43943301	43949569		A01	49834562	49836736		A01	20005082	20006187		A01	13740152	13742665
A01	15508995	15509592		A01	45387967	45388575		A01	49838447	49839907		A01	20270991	20274769		A01	13749541	13750349
A01	15574609	15575480		A01	45683989	45685778		A01	50024551	50027959		A01	20337055	20345388		A01	13775614	13776453
A01	15693365	15694589		A01	45820084	45820807		A01	50632763	50633587		A01	20349552	20350525		A01	13799271	13801228
A01	15784437	15786411		A01	45952359	45953336		A01	50741373	50743560		A01	20394955	20397209		A01	13810777	13811377
A01	15893016	15894312		A01	45961964	45963155		A01	50858639	50866121		A01	20406319	20407760		A01	13849268	13851779
A01	16274825	16275379		A01	46234389	46235062		A01	50986842	50988710		A01	20409280	20412532		A01	13889565	13890751
A01	16356346	16359598		A01	46246961	46247589		A01	51099131	51106479		A01	20467513	20468008		A01	13951869	13956153
A01	16367418	16371828		A01	46252898	46253620		A01	51121824	51122532		A01	20471119	20473486		A01	13985710	13987839
A01	16382209	16383625		A01	46661006	46669309		A01	51842071	51851007		A01	20616984	20618578		A01	13989035	13991470
A01	16385274	16387683		A01	46927041	46928008		A01	51836331	51841163		A01	20625410	20626146		A01	13997883	13998551
A01	16410751	16412970		A01	47028064	47028887		A01	51856174	51860626		A01	20641970	20644461		A01	14006495	14007217
A01	16447488	16448032		A01	47219080	47219913		A01	51877401	51878273		A01	20652481	20653287		A01	14018444	14019399
A01	16659569	16660369		A01	47228710	47229708		A01	51992954	51995166		A01	20687345	20688763		A01	14043587	14044736
A01	16667009	16668102		A01	48205693	48206808		A01	53088231	53091022		A01	20776581	20782056		A01	14048187	14050214
A01	16707765	16708456		A01	48255855	48256778		A01	53158894	53162332		A01	20811007	20811758		A01	14058366	14059324
A01	16756076	16756817		A01	49834630	49835586		A01	54359581	54360072		A01	20815374	20816104		A01	14061306	14062343
A01	16763397	16765839		A01	49838517	49839214		A01	54453163	54453873		A01	20879443	20880183		A01	14063639	14072625
A01	16793307	16794917		A01	50024602	50025403		A01	54456809	54464526		A01	20881323	20882533		A01	14106756	14108674
A01	16822833	16825002		A01	50177593	50180678		A01	55450461	55453587		A01	20940011	20947171		A01	14112597	14115091
A01	16833028	16834267		A01	50269210	50282278		A01	55895640	55921981		A01	20948759	20951642		A01	14198132	14199934
A01	17024729	17025373		A01	50489613	50495183		A01	57801980	57806233		A01	20964540	20965248		A01	14203478	14204881
A01	17062371	17064004		A01	50632776	50634018		A01	59102700	59107306		A01	20977767	20980319		A01	14210631	14211427
A01	17360283	17360818		A01	50741419	50742273		A01	59177672	59180430		A01	21104131	21104759		A01	14216292	14217312
A01	17368088	17370766		A01	50986868	50987656		A01	59307807	59313508		A01	21110531	21112562		A01	14225931	14226789
A01	17427075	17432435		A01	50992195	50995874		A01	59318172	59319616		A01	21241555	21243861		A01	14261180	14262473
A01	17514880	17516115		A01	51100093	51102305		A01	59371337	59384118		A01	21246103	21248383		A01	14398999	14399696
A01	17537343	17539178		A01	51480205	51485466		A01	59609516	59622278		A01	21302592	21303317		A01	14540116	14546572
A01	17618231	17619628		A01	51837645	51839260		A01	59998311	60010751		A01	21351953	21353333		A01	14628591	14630221
A01	17855724	17857387		A01	51859766	51860582		A01	60024918	60028739		A01	21520838	21523113		A01	14706834	14709364
A01	17875659	17877710		A01	51994102	51995122		A01	60029847	60034633		A01	21525388	21526930		A01	14711050	14711917
A01	17910332	17912237		A01	52401628	52406354		A01	60057310	60059388		A01	21631705	21632483		A01	14718866	14720356
A01	17930694	17935904		A01	52613624	52615117		A01	60383439	60390237		A01	21633370	21634224		A01	14844198	14844881
A01	17952269	17955632		A01	52727272	52733221		A01	60941578	60946030		A01	21643007	21643721		A01	14848689	14850504
A01	18044554	18047576		A01	53088294	53089104		A01	61017995	61023581		A01	21816834	21817841		A01	15399398	15401043
A01	18058954	18059644		A01	53158986	53159857		A01	64147885	64150995		A01	21819368	21823490		A01	15412252	15413606
A01	18071851	18072900		A01	54357942	54365366		A01	64337527	64341065		A01	21942202	21943653		A01	15494176	15494833
A01	18165490	18167414		A01	55920990	55921959		A01	66378294	66387591		A01	21962136	21965445		A01	15574545	15575478
A01	18231289	18233833		A01	57805280	57806164		A01	66358536	66377413		A01	21978383	21980240		A01	15785512	15786436
A01	18265746	18270902		A01	59102722	59103538		A01	66388728	66390651		A01	22111627	22116195		A01	15790220	15792638
A01	18433275	18437319		A01	59177728	59178487		A01	66685459	66686105		A01	22245983	22249474		A01	15849191	15850918
A01	18443002	18445426		A01	59318820	59319612		A01	66984868	66986757		A01	22252705	22253972		A01	15878998	15880160
A01	18485633	18487716		A01	59371384	59372142		A01	68610490	68613641		A01	22895054	22895951		A01	15893018	15894341
A01	18491832	18494959		A01	59609658	59610506		A01	68663862	68666612		A01	22904571	22905443		A01	16369941	16372745
A01	18496472	18497949		A01	60338179	60339033		A01	68951324	68956183		A01	23039018	23039930		A01	16385312	16387277
A01	18528397	18529026		A01	60383459	60384338		A01	68957525	68965575		A01	23040889	23043353		A01	16407953	16413647
A01	18539851	18541034		A01	60944843	60945943		A01	69697157	69707402		A01	23170017	23170925		A01	16447489	16447984
A01	18645620	18648687		A01	64150021	64150945		A01	69754606	69755005		A01	23338959	23339834		A01	16512114	16512677
A01	18650676	18652061		A01	66389663	66390580		A01	69771568	69773436		A01	23491829	23495744		A01	16659601	16660399
A01	18706568	18709798		A01	66679248	66684021		A01	70218070	70222013		A01	23502630	23509037		A01	16667036	16668102
A01	18733159	18735502		A01	67712057	67719210		A01	70578852	70582546		A01	23593330	23600158		A01	16707764	16708503
A01	18748617	18750301		A01	68612787	68613586		A01	71842251	71845466		A01	23617887	23619508		A01	16755940	16756802
A01	18752689	18756812		A01	68663888	68664426		A01	72059634	72060544		A01	23883189	23886159		A01	16763393	16765850
A01	18829643	18831511		A01	68742421	68754359		A01	72629346	72632121		A01	23888112	23888802		A01	16789728	16791787
A01	18834500	18842849		A01	68951314	68952401		A01	73695919	73699313		A01	24235392	24240231		A01	16794076	16794929
A01	18851255	18852512		A01	68957565	68958369		A01	73941945	73949630		A01	24231716	24233697		A01	16820652	16825021
A01	18874605	18880896		A01	69219694	69227733		A01	75093628	75100968		A01	24265660	24266494		A01	16833028	16834221
A01	18891630	18896144		A01	69706482	69707334		A01	75390199	75391071		A01	24281858	24282548		A01	16870206	16870947
A01	18912588	18913751		A01	69723343	69731407		A01	75616451	75617530		A01	24404888	24406653		A01	17024682	17025363
A01	18942490	18944779		A01	70221206	70222054		A01	75647006	75648539		A01	24443442	24444003		A01	17062342	17066402
A01	18946172	18948009		A01	70234261	70236429		A01	75814607	75815781		A01	24669230	24670275		A01	17069088	17071884
A01	18990831	18992338		A01	70578884	70579560		A01	76359690	76364747		A01	24699741	24700323		A01	17128305	17130210
A01	19002678	19004550		A01	71509887	71510625		A01	76425205	76427546		A01	24738376	24741013		A01	17147335	17148051
A01	19028469	19032194		A01	71846918	71853337		A01	76462412	76464857		A01	24743111	24743955		A01	17272199	17273320
A01	19119830	19124543		A01	72629356	72629934		A01	76507661	76508417		A01	24766069	24766968		A01	17277549	17277947
A01	19147173	19150042		A01	73121162	73134601		A01	76530170	76531697		A01	24958875	24960847		A01	17360283	17360712
A01	19198555	19200559		A01	73696071	73696886		A01	76825873	76827302		A01	24970999	24973076		A01	17431490	17432412
A01	19246735	19249356		A01	73941987	73942865		A01	79573848	79574780		A01	24974177	24977910		A01	17537306	17539923
A01	19251208	19252949		A01	74265239	74273646		A01	80541437	80550480		A01	24992766	24994150		A01	17654707	17655801
A01	19254922	19258219		A01	75129878	75135368		A01	80717507	80721074		A01	25000627	25002053		A01	17774998	17777173
A01	19260376	19264470		A01	75223817	75230006		A01	80726607	80727012		A01	25005680	25007682		A01	17807103	17807727
A01	19266682	19271933		A01	75616419	75619270		A01	80867947	80870980		A01	25031706	25037313		A01	17855712	17857153
A01	19282637	19287075		A01	75646994	75647939		A01	80891189	80894148		A01	25038523	25040258		A01	17874954	17878541
A01	19314095	19315157		A01	75655753	75656424		A01	80993304	80999855		A01	25046181	25047283		A01	17930713	17931612
A01	19325940	19330584		A01	75847979	75849982		A01	81076545	81080073		A01	25049786	25050830		A01	17952270	17953915
A01	19371502	19374724		A01	75919990	75928107		A01	81095959	81097199		A01	25084503	25088224		A01	18002364	18003045
A01	19421115	19428700		A01	75934767	75935407		A01	81193846	81198062		A01	25308383	25310768		A01	18013746	18014768
A01	19431203	19433220		A01	76363882	76364705		A01	81480153	81484416		A01	25319013	25322713		A01	18044570	18045944
A01	19451839	19463869		A01	76530201	76531397		A01	81490226	81497941		A01	25350012	25352494		A01	18049518	18050072
A01	19513705	19514695		A01	76825877	76826766		A01	81507739	81510745		A01	25497935	25498313		A01	18059009	18059658
A01	19516975	19518328		A01	77104015	77106574		A01	81515596	81522616		A01	25524141	25525692		A01	18071767	18072900
A01	19534179	19535918		A01	80719975	80720981		A01	82091021	82105007		A01	25527344	25532940		A01	18157790	18159387
A01	19556000	19556684		A01	80870266	80870927		A01	82231325	82234621		A01	25537887	25538526		A01	18165494	18167431
A01	19569733	19571293		A01	80891299	80891902		A01	82561743	82562509		A01	25545998	25546520		A01	18194963	18196255
A01	19578371	19580900		A01	80993298	80994278		A01	82802954	82804644		A01	25582688	25588463		A01	18255656	18256843
A01	19582555	19586124		A01	81193856	81194525		A01	85091623	85097162		A01	25594537	25596211		A01	18262881	18267567
A01	19588001	19591521		A01	81480198	81480864		A01	85761408	85764953		A01	25609817	25612798		A01	18433287	18436781
A01	19603029	19605469		A01	81497226	81497870		A01	85921450	85925617		A01	25613999	25619275		A01	18444388	18445424
A01	19718619	19719867		A01	81509610	81510528		A01	85940013	85947301		A01	25708984	25709891		A01	18484703	18486648
A01	19742868	19745867		A01	81521661	81522571		A01	85957487	85959203		A01	25718743	25724470		A01	18496280	18497989
A01	19764415	19765507		A01	82104144	82105005		A01	86034773	86036719		A01	25729528	25734192		A01	18528322	18529183
A01	19831624	19834091		A01	82231301	82232384		A01	86161124	86162187		A01	25983213	25984079		A01	18534637	18541023
A01	19836916	19841972		A01	82703940	82705113		A01	86170552	86172734		A01	26019327	26020726		A01	18649460	18652062
A01	19981775	19982958		A01	82706247	82708142		A01	86209265	86213956		A01	26197743	26198892		A01	18686528	18690620
A01	19986733	19990096		A01	82803082	82803987		A01	86262496	86270560		A01	26219102	26221224		A01	18706515	18707499
A01	20001827	20006204		A01	85096050	85097118		A01	86636155	86638301		A01	26450854	26451649		A01	18734597	18735449
A01	20007978	20011379		A01	85784225	85789660		A01	86832259	86834625		A01	26478184	26478434		A01	18748631	18749772
A01	20197614	20200375		A01	85854390	85857523		A01	86939977	86945321		A01	26510496	26512595		A01	18755380	18756902
A01	20269347	20274795		A01	85921471	85922169		A01	87178531	87182885		A01	26538927	26542305		A01	18850654	18852519
A01	20336696	20340422		A01	86089120	86095464		A01	88034341	88036965		A01	26667142	26668528		A01	18870953	18871411
A01	20348117	20350537		A01	86212291	86213808		A01	88114000	88115707		A01	26903334	26905439		A01	18879723	18881070
A01	20396018	20397034		A01	86262524	86263373		A01	88117923	88119679		A01	27299853	27301213		A01	18912689	18913710
A01	20409383	20412543		A01	86446045	86449395		A01	88160451	88162187		A01	27635464	27636180		A01	18942177	18947913
A01	20471100	20473284		A01	86637449	86638211		A01	88176145	88177639		A01	28758803	28759334		A01	18969648	18971154
A01	20486937	20489178		A01	86833749	86834585		A01	88400816	88401297		A01	29048834	29049888		A01	19027410	19032596
A01	20496592	20497699		A01	86943895	86945299		A01	88420538	88421990		A01	29461455	29462194		A01	19121131	19124510
A01	20616955	20620883		A01	87181837	87182756		A01	88567635	88571590		A01	29532804	29533294		A01	19146213	19150035
A01	20624492	20625993		A01	88035980	88036948		A01	88600262	88602480		A01	30103097	30105124		A01	19248748	19249238
A01	20642774	20644122		A01	88114982	88115675		A01	88709622	88710567		A01	30120304	30120843		A01	19255179	19257875
A01	20652515	20653316		A01	88118976	88122808		A01	88837104	88844932		A01	30512570	30512924		A01	19260192	19261298
A01	20687331	20688991		A01	88127341	88132732		A01	88867187	88868271		A01	30757869	30761866		A01	19268892	19271939
A01	20699502	20702230		A01	88176707	88177598		A01	89158477	89162692		A01	30764492	30769720		A01	19282552	19286922
A01	20776568	20782040		A01	88215235	88217275		A01	89164360	89168808		A01	31052374	31052973		A01	19314066	19314723
A01	20807976	20811766		A01	88600354	88601284		A01	89175968	89177732		A01	31054706	31055852		A01	19325940	19326898
A01	20815385	20816091		A01	89106875	89112734		A01	89189355	89189789		A01	31077777	31078867		A01	19421313	19423780
A01	20875744	20880195		A01	89161772	89162640		A01	89434930	89437438		A01	31299928	31302828		A01	19431964	19433264
A01	20881246	20882489		A01	89176013	89176844		A01	89709748	89715136		A01	31436720	31438426		A01	19451810	19452866
A01	20901896	20903198		A01	89189283	89191004		A01	89785590	89786647		A01	31546268	31548592		A01	19513661	19514397
A01	20940093	20946252		A01	89714101	89715073		A01	90352324	90362429		A01	31683177	31684390		A01	19555967	19556755
A01	20964494	20965243		A01	89743526	89752486		A01	90776902	90780528		A01	31734915	31736091		A01	19569612	19570888
A01	20979248	20981790		A01	89979354	89987797		A01	91069136	91070884		A01	31762147	31763401		A01	19584167	19587137
A01	21003109	21004161		A01	90361505	90362374		A01	93941614	93944134		A01	31784932	31786563		A01	19590239	19591605
A01	21007885	21010191		A01	90776940	90777892		A01	93973580	93975307		A01	31828365	31829117		A01	19602953	19605319
A01	21084974	21085612		A01	91466010	91469719		A01	93982282	93992674		A01	31830308	31831749		A01	19718479	19719905
A01	21098317	21100004		A01	92252804	92260447		A01	94104484	94118065		A01	31847180	31847746		A01	19763483	19765411
A01	21104184	21104627		A01	92263577	92268711		A01	94153119	94155245		A01	32007997	32008659		A01	19831625	19839363
A01	21110703	21112530		A01	93949632	93950264		A01	94313970	94315040		A01	32011759	32012625		A01	19841252	19841965
A01	21241655	21243771		A01	94117046	94118028		A01	94605327	94608027		A01	32035151	32037145		A01	19872872	19873798
A01	21302607	21305071		A01	94314045	94315019		A01	94667150	94667767		A01	32100388	32102273		A01	19986788	19990242
A01	21352088	21353314		A01	94364013	94364968		A01	94744775	94757608		A01	32131927	32132885		A01	20004989	20006200
A01	21520790	21522472		A01	94478888	94484784		A01	94823118	94825631		A01	32282895	32283256		A01	20269577	20274796
A01	21526014	21526988		A01	94667210	94667752		A01	95040381	95045494		A01	32286155	32288122		A01	20337050	20345633
A01	21631781	21634189		A01	94685351	94689207		A01	95339080	95342143		A01	32622017	32622901		A01	20349531	20350514
A01	21642887	21643782		A01	94744775	94745535		A01	95427577	95430364		A01	32633189	32636987		A01	20395067	20397327
A01	21753142	21754603		A01	94823155	94823650		A01	95693090	95696539		A01	32846447	32847152		A01	20406263	20407761
A01	21816842	21819024		A01	95339230	95339830		A01	95805155	95806525		A01	32921911	32923292		A01	20409244	20412602
A01	21821172	21823511		A01	96039040	96040762		A01	96036153	96037705		A01	33090859	33091900		A01	20467598	20468032
A01	21889058	21890648		A01	96572346	96578370		A01	96257011	96261215		A01	33976951	33977459		A01	20469340	20473408
A01	21961482	21965447		A01	96971345	96972162		A01	96927988	96931891		A01	34180385	34180801		A01	20486899	20489873
A01	21978505	21980241		A01	97128076	97141265		A01	96968449	96972222		A01	34198598	34199199		A01	20496667	20497834
A01	22112817	22115671		A01	97841971	97843090		A01	96985449	96989275		A01	34252422	34253267		A01	20616985	20618505
A01	22249579	22253875		A01	97957468	97958534		A01	97839064	97843102		A01	34947501	34948310		A01	20625430	20625993
A01	22402971	22404965		A01	98831727	98834416		A01	97957440	97959064		A01	35317642	35319403		A01	20642699	20644540
A01	22788880	22791909		A01	98963210	98966896		A01	98277946	98279349		A01	36044019	36046178		A01	20652473	20653338
A01	22894969	22898596		A01	99254141	99255157		A01	98497903	98500793		A01	36279514	36280159		A01	20687333	20688435
A01	22904566	22910200		A01	99647193	99648284		A01	98671776	98673488		A01	36471100	36472763		A01	20776581	20782065
A01	23030865	23033579		A01	99866027	99869136		A01	98683196	98684420		A01	37367187	37367900		A01	20794542	20795953
A01	23037513	23039902		A01	99875816	99877796		A01	98753528	98755861		A01	37542606	37543258		A01	20811004	20811749
A01	23041109	23043354		A01	100037043	100038171		A01	98756910	98759942		A01	37720790	37721745		A01	20815376	20816072
A01	23045075	23045815		A01	100122566	100123544		A01	98831704	98834934		A01	37878090	37881289		A01	20881345	20882452
A01	23156157	23158995		A01	100294114	100301111		A01	99254081	99262808		A01	38030707	38032348		A01	20939876	20948044
A01	23168213	23170965		A01	100325833	100326593		A01	99264763	99266581		A01	38068673	38070062		A01	20949073	20949181
A01	23191106	23192476		A01	100361010	100361800		A01	99268126	99271869		A01	38186266	38188453		A01	20950224	20951752
A01	23338920	23339846		A01	100387889	100388694		A01	99631838	99635151		A01	38424651	38426438		A01	20964497	20965248
A01	23488203	23489553		A01	100411101	100416384		A01	99647150	99651761		A01	38470798	38471522		A01	20977778	20980335
A01	23491858	23492788		A01	100456841	100457504		A01	99746370	99748548		A01	39084747	39085647		A01	21104079	21104735
A01	23502625	23504775		A01	100502569	100506037		A01	99750193	99752758		A01	39129513	39131195		A01	21110591	21112566
A01	23506259	23509051		A01	100540426	100542037		A01	99800860	99801536		A01	39155015	39156597		A01	21241627	21243904
A01	23544635	23546752		A01	100618221	100618886		A01	99929140	99934556		A01	39272012	39273005		A01	21246161	21248482
A01	23576630	23577847		A01	100740883	100741692		A01	100003922	100005406		A01	39358934	39360234		A01	21302596	21303292
A01	23844605	23845908		A01	100773031	100773981		A01	100036978	100038166		A01	39392168	39393674		A01	21328034	21330558
A01	23883015	23884906		A01	100980883	100986189		A01	100043434	100045865		A01	39431759	39437522		A01	21351969	21353321
A01	23888140	23888789		A01	100995609	100998590		A01	100120687	100123551		A01	39542274	39545029		A01	21520789	21522433
A01	24236007	24239765		A01	101162205	101162962		A01	100307025	100311401		A01	39749264	39750731		A01	21526051	21526972
A01	24231705	24234822		A01	101375229	101376169		A01	100314206	100321016		A01	39859200	39864882		A01	21631717	21634236
A01	24265660	24267254		A01	101451275	101452773		A01	100322697	100326719		A01	39876310	39877251		A01	21642999	21643741
A01	24281791	24285171		A01	101636509	101637160		A01	100360996	100363512		A01	39885097	39888516		A01	21749935	21754614
A01	24298229	24301658		A01	101665168	101665962		A01	100387866	100398135		A01	39988057	39988636		A01	21816824	21817778
A01	24404900	24410744		A01	101669623	101670674		A01	100453308	100457514		A01	40076597	40082241		A01	21822480	21823518
A01	24466760	24468274		A01	101680891	101681624		A01	100536418	100542030		A01	40122608	40124006		A01	21942000	21943687
A01	24669634	24677298		A01	101699348	101704766		A01	100617024	100618959		A01	40141645	40142262		A01	21962444	21963345
A01	24692670	24695519		A01	101754279	101754979		A01	100695199	100708977		A01	40147569	40148862		A01	21964431	21965463
A01	24699042	24700357		A01	101783468	101784120		A01	100737892	100741787		A01	40287181	40290237		A01	21978515	21980251
A01	24738367	24740528		A01	101852946	101857696		A01	100773029	100775354		A01	40426203	40429339		A01	22112316	22116141
A01	24743115	24743981		A01	102009424	102016520		A01	101375208	101377542		A01	40724542	40726191		A01	22252558	22253945
A01	24898431	24899066		A01	102027943	102028787		A01	101449803	101452832		A01	40819405	40820227		A01	22895027	22895934
A01	24958911	24960860		A01	102065375	102066219		A01	101498343	101498854		A01	41054548	41058558		A01	22904565	22905519
A01	24971000	24978860		A01	102105525	102106341		A01	101646534	101652772		A01	41279503	41281698		A01	23038969	23039898
A01	24992842	24994153		A01	102139268	102141774		A01	101664993	101666806		A01	41287973	41288841		A01	23040902	23043372
A01	25000587	25002555		A01	102143409	102147400		A01	101669600	101676076		A01	41382514	41384808		A01	23045080	23045737
A01	25005256	25007468		A01	102151620	102164037		A01	101680908	101689339		A01	41386839	41387742		A01	23075526	23077301
A01	25031655	25032787		A01	102225118	102230023		A01	101716936	101717570		A01	41399236	41399799		A01	23169938	23170947
A01	25034214	25036174		A01	102231216	102232094		A01	101711568	101715925		A01	41464400	41465456		A01	23191258	23192476
A01	25038431	25039800		A01	102267386	102267960		A01	101732717	101755025		A01	41547147	41548257		A01	23338901	23339923
A01	25046372	25050831		A01	102361433	102364489		A01	101783426	101786274		A01	41641768	41643942		A01	23491806	23495574
A01	25084525	25087107		A01	102458679	102460444		A01	101843889	101844685		A01	41669024	41671500		A01	23502606	23505748
A01	25109019	25111249		A01	102518857	102529307		A01	101934046	101936151		A01	41765002	41766745		A01	23508142	23509048
A01	25287976	25290027		A01	102553234	102554010		A01	102024933	102028790		A01	41824511	41824727		A01	23576534	23577850
A01	25308372	25310613		A01	102569021	102575626		A01	102030997	102034285		A01	42020042	42020575		A01	23593369	23595607
A01	25319353	25322424		A01	102605641	102606326		A01	102064141	102066325		A01	42021685	42022520		A01	23597037	23600196
A01	25349926	25350914		A01	102612982	102613666		A01	102068960	102071485		A01	42535142	42536373		A01	23617921	23619213
A01	25497906	25498291		A01	102646419	102648650		A01	102103524	102106446		A01	42872839	42878337		A01	23883113	23886188
A01	25509945	25512035		A01	102754636	102755094		A01	102126169	102130599		A01	45362435	45363540		A01	23888105	23888867
A01	25520628	25525693		A01	102779729	102780609		A01	102139159	102139892		A01	45384159	45385009		A01	24231696	24233844
A01	25527317	25528851		A01	102817164	102823290		A01	102211969	102213118		A01	45386155	45388894		A01	24235936	24239762
A01	25534854	25538566		A01	103007336	103008130		A01	102220894	102222530		A01	45508398	45511533		A01	24265659	24266664
A01	25545440	25546550		A01	103054551	103055485		A01	102231158	102233279		A01	45514562	45515814		A01	24281781	24282579
A01	25582646	25588295		A01	103125622	103126320		A01	102234313	102241453		A01	45549822	45550356		A01	24300040	24301796
A01	25589723	25592133		A01	103142457	103143339		A01	102245304	102246283		A01	45726709	45730082		A01	24404887	24406340
A01	25594513	25596145		A01	103222819	103227097		A01	102267379	102270481		A01	45757422	45763185		A01	24443442	24444161
A01	25609827	25612263		A01	103288109	103288917		A01	102459582	102460400		A01	45785576	45787271		A01	24669227	24670340
A01	25613969	25619266		A01	103409031	103410690		A01	102536839	102539509		A01	45819825	45821253		A01	24699602	24700339
A01	25722327	25724352		A01	103456780	103463831		A01	102553218	102559079		A01	45952312	45953408		A01	24738370	24740832
A01	25729600	25736631		A01	103491043	103491845		A01	102598735	102600785		A01	45961387	45963128		A01	24743102	24743977
A01	25795055	25796608		A01	103554722	103555584		A01	102593840	102597238		A01	46233360	46235092		A01	24766035	24766967
A01	25983135	25984136		A01	103611775	103615695		A01	102605582	102613666		A01	46246640	46247619		A01	24958874	24960896
A01	26017132	26020726		A01	103670629	103671655		A01	102680620	102686384		A01	46252898	46253625		A01	24970966	24973267
A01	26141666	26145139		A01	103696228	103696737		A01	102779572	102780667		A01	46398338	46398845		A01	24974446	24977759
A01	26197711	26198952		A01	103720748	103725665		A01	102787717	102789240		A01	46584128	46585837		A01	24992864	24994153
A01	26219095	26220824		A01	103860275	103865847		A01	102857512	102858786		A01	46924887	46928033		A01	25000606	25002223
A01	26450891	26451760		A01	103915542	103919745		A01	103003736	103008196		A01	46932507	46933532		A01	25005560	25007410
A01	26475519	26477094		A01	103959228	103961373		A01	103063249	103064563		A01	47027882	47028907		A01	25031645	25037300
A01	26510503	26512830		A01	103987020	103987819		A01	103109652	103122057		A01	47218996	47220197		A01	25038442	25040102
A01	26539424	26542297		A01	104080505	104081498		A01	103123073	103126380		A01	47228054	47230316		A01	25049770	25050843
A01	26667058	26668517		A01	104114229	104115077		A01	103140812	103143348		A01	48205690	48206809		A01	25084507	25088095
A01	26893218	26894914		A01	104131395	104132637		A01	103226272	103227938		A01	48212778	48214394		A01	25198557	25200649
A01	26955294	26956502		A01	104265161	104265975		A01	103229623	103231787		A01	48252305	48256817		A01	25288000	25288369
A01	27300632	27302122		A01	104277551	104278207		A01	103277275	103279074		A01	49834593	49840366		A01	25308295	25310656
A01	27312100	27312761		A01	104388839	104393120		A01	103284485	103288924		A01	50024554	50025355		A01	25319089	25322625
A01	28635121	28640973		A01	104504461	104510768		A01	103377079	103377778		A01	50033570	50034279		A01	25349915	25351868
A01	28750907	28752483		A01	104512021	104512798		A01	103455255	103457527		A01	50269467	50270540		A01	25497461	25498319
A01	28758900	28759357		A01	104534758	104535422		A01	103545485	103548253		A01	50632260	50633618		A01	25524800	25525692
A01	29048821	29053784		A01	104621539	104625338		A01	103550322	103555642		A01	50741273	50744478		A01	25527310	25532926
A01	29460255	29462194		A01	104731243	104732033		A01	103559136	103561582		A01	50865162	50866081		A01	25537807	25538532
A01	29532782	29533294		A01	104771178	104771881		A01	103674640	103681655		A01	50986843	50988588		A01	25545667	25546521
A01	29887195	29887968		A01	104778342	104779107		A01	103701574	103705132		A01	51095550	51097009		A01	25582670	25588361
A01	30103182	30105381		A01	104884492	104890849		A01	103753680	103759819		A01	51098325	51102599		A01	25589760	25591205
A01	30684316	30685501		A01	104927582	104929781		A01	103871184	103872312		A01	51115175	51115764		A01	25594537	25596066
A01	30759319	30768525		A01	104990324	104999464		A01	103985304	103987844		A01	51121814	51122582		A01	25609816	25612587
A01	30923315	30924811		A01	105142179	105142993		A01	103989128	103991478		A01	51797018	51800319		A01	25613966	25619326
A01	31052449	31052922		A01	105148956	105149929		A01	104131136	104132731		A01	51805826	51806374		A01	25708972	25709868
A01	31054651	31057552		A01	105226239	105227384		A01	104265110	104270349		A01	51836331	51840945		A01	25719605	25724478
A01	31069333	31072929		A01	105236113	105236596		A01	104277360	104279517		A01	51846819	51847984		A01	25729527	25734217
A01	31074260	31075809		A01	105322543	105323320		A01	104512023	104516932		A01	51859763	51861503		A01	25983130	25984108
A01	31077846	31078859		A01	105337644	105338630		A01	104520488	104523439		A01	51877369	51878215		A01	26019394	26020726
A01	31203440	31204891		A01	105349959	105351893		A01	104731269	104737656		A01	53088212	53089220		A01	26197763	26198859
A01	31300715	31302859		A01	105412824	105413451		A01	104750238	104762283		A01	53904795	53906868		A01	26219101	26220372
A01	31305963	31307599		A01	105468343	105473670		A01	104771130	104772545		A01	54366866	54367095		A01	26278000	26279512
A01	31436840	31437315		A01	105479628	105484673		A01	104778284	104781821		A01	54452692	54453985		A01	26450850	26451662
A01	31443564	31446374		A01	105491595	105492170		A01	104885817	104886503		A01	54456834	54458010		A01	26478185	26478432
A01	31520545	31521743		A01	105544941	105553887		A01	105140750	105143082		A01	55450470	55452046		A01	26510461	26512714
A01	31588840	31589928		A01	105561931	105563993		A01	105147291	105150002		A01	55470460	55471241		A01	26539032	26542305
A01	31591831	31592975		A01	105592121	105597627		A01	105225891	105227384		A01	58729834	58730591		A01	26667109	26668514
A01	31683196	31688796		A01	105611598	105619601		A01	105230686	105236633		A01	59102718	59103494		A01	26903963	26905468
A01	31734891	31737225		A01	105627580	105628436		A01	105297133	105299470		A01	59177689	59178880		A01	27300565	27301300
A01	31784858	31787006		A01	105809116	105809833		A01	105322462	105325796		A01	59317730	59319616		A01	27312166	27312732
A01	31830378	31831646		A01	105855513	105856480		A01	105337641	105338826		A01	59334049	59335105		A01	27635462	27636294
A01	31844967	31847763		A01	105866759	105867580		A01	105345892	105357959		A01	59609505	59610252		A01	28758761	28759360
A01	31862216	31864084		A01	105873951	105874695		A01	105412824	105413488		A01	59997965	59999415		A01	29048829	29050097
A01	32004557	32008758		A01	106051208	106052009		A01	105491593	105492160		A01	60029697	60031706		A01	29461461	29462194
A01	32011798	32012572		A01	106150605	106156435		A01	105511746	105512555		A01	60056480	60059403		A01	29532781	29533336
A01	32027025	32027707		A01	106251189	106252478		A01	105563296	105563940		A01	60314679	60316741		A01	29887240	29887955
A01	32036206	32037173		A01	106311372	106323728		A01	105604533	105606937		A01	60383443	60384528		A01	30103068	30104958
A01	32100384	32102102		A01	106456051	106457799		A01	105627581	105629846		A01	60944334	60946047		A01	30120290	30120829
A01	32274032	32274719		A01	106468712	106469205		A01	105805804	105809838		A01	61015125	61017743		A01	30512570	30512916
A01	32282873	32284109		A01	106488216	106488733		A01	105854442	105856489		A01	61092686	61093458		A01	30759188	30760911
A01	32285318	32287910		A01	106536645	106539051		A01	105865377	105869909		A01	64061664	64062219		A01	30764428	30767607
A01	32353798	32357078		A01	106608933	106609479		A01	105872363	105874781		A01	64149334	64150991		A01	30923801	30924801
A01	32622021	32624599		A01	106646826	106647588		A01	105998115	105998857		A01	64339961	64341057		A01	31052339	31053004
A01	32633700	32636099		A01	106666259	106673368		A01	106050989	106060364		A01	65094269	65097331		A01	31054644	31055768
A01	32724043	32725374		A01	106680143	106686579		A01	106116717	106117772		A01	66389584	66391503		A01	31074748	31075785
A01	32846435	32848844		A01	106693919	106694580		A01	106139344	106140260		A01	66637648	66638743		A01	31077801	31078911
A01	32911322	32920792		A01	106730463	106738548		A01	106251048	106285677		A01	66639697	66643132		A01	31300295	31302829
A01	32922061	32923901		A01	106771658	106776161		A01	106486324	106488859		A01	66677223	66678200		A01	31305959	31306314
A01	32925771	32927818		A01	107036876	107037378		A01	106606967	106609495		A01	66681125	66684160		A01	31436719	31438365
A01	33089659	33091900		A01	107116912	107120641		A01	106640367	106647596		A01	66685293	66686215		A01	31445282	31446346
A01	33521943	33524112		A01	107149639	107151023		A01	106685730	106687293		A01	66983021	66983727		A01	31546611	31548604
A01	34046311	34048591		A01	107192934	107196314		A01	106691790	106694556		A01	66984850	66986769		A01	31588779	31592997
A01	34197034	34199267		A01	107198595	107199253		A01	106806151	106807747		A01	67167979	67168868		A01	31683160	31684409
A01	34252392	34254227		A01	107204970	107205834		A01	106851500	106853070		A01	67738518	67739291		A01	31734894	31736046
A01	34947471	34954980		A01	107243673	107244404		A01	106873193	106877973		A01	68047461	68051301		A01	31761940	31763413
A01	36043963	36046290		A01	107415381	107417567		A01	106944729	106950159		A01	68618359	68618980		A01	31784917	31786116
A01	36428507	36432570		A01	107435651	107437800		A01	106980716	106982107		A01	68663840	68665309		A01	31828281	31829150
A01	36471171	36472648		A01	107480908	107481527		A01	106966578	106979831		A01	68839849	68843692		A01	31830305	31831727
A01	37129348	37131101		A01	107492271	107492912		A01	107017246	107018056		A01	68951252	68952432		A01	31847127	31847754
A01	37279018	37280878		A01	107632454	107636158		A01	107036829	107038612		A01	68957526	68958709		A01	31862253	31863307
A01	37367261	37367888		A01	107637321	107638576		A01	107092409	107105091		A01	69726396	69730545		A01	32007965	32008701
A01	37797888	37799901		A01	107705050	107705631		A01	107119339	107120633		A01	69754594	69755051		A01	32011760	32012629
A01	37875823	37881362		A01	107743426	107745765		A01	107122721	107126023		A01	69771540	69775168		A01	32026971	32027704
A01	38186190	38192242		A01	107824784	107825437		A01	107149571	107152185		A01	69935791	69937766		A01	32035262	32037198
A01	38343320	38344762		A01	107832362	107836295		A01	107154690	107157579		A01	70221287	70222007		A01	32100393	32102134
A01	38424428	38426273		A01	107880534	107884665		A01	107198559	107200529		A01	70578787	70580295		A01	32109337	32110294
A01	38470833	38471523		A01	107962621	107963384		A01	107202084	107203438		A01	71509807	71510388		A01	32131963	32132880
A01	39084724	39086835		A01	108560351	108561222		A01	107204951	107211139		A01	71842284	71843464		A01	32274056	32275402
A01	39094627	39097212		A01	108609508	108617466		A01	107226170	107229690		A01	72030201	72031155		A01	32282891	32283427
A01	39154653	39156595		A01	108621127	108621806		A01	107243608	107248262		A01	72059289	72060912		A01	32286463	32288039
A01	39271983	39273045		A01	108623574	108635718		A01	107364746	107366670		A01	72613540	72618503		A01	32622021	32622880
A01	39358922	39361491		A01	108672700	108678413		A01	107371085	107374767		A01	72629339	72630008		A01	32633710	32636643
A01	39392125	39393428		A01	108813576	108814241		A01	107396730	107399162		A01	73695661	73699983		A01	32846482	32847582
A01	39431746	39437507		A01	108873028	108873639		A01	107402545	107409183		A01	73947490	73950048		A01	32922017	32923279
A01	39543209	39545047		A01	108876965	108877508		A01	107455990	107458743		A01	74953099	74957386		A01	33090877	33091900
A01	39748751	39750746		A01	108917585	108921628		A01	107479835	107481530		A01	75100637	75103042		A01	34198330	34199225
A01	39859178	39859550		A01	108923195	108924767		A01	107489955	107492949		A01	75390201	75391074		A01	34252378	34253301
A01	39876298	39880662		A01	108999833	109007890		A01	107526655	107529784		A01	75633506	75634657		A01	34947483	34948357
A01	39885211	39888522		A01	109043442	109043994		A01	107705050	107705702		A01	75647006	75649032		A01	35317611	35319401
A01	40076554	40078409		A01	109102933	109115885		A01	107765950	107772506		A01	75814563	75815882		A01	36043978	36046167
A01	40122518	40123905		A01	109139296	109139878		A01	107773928	107775748		A01	75930736	75930960		A01	36428527	36430305
A01	40140434	40142292		A01	109144261	109145081		A01	107817690	107821248		A01	75934749	75935511		A01	36471114	36472524
A01	40144358	40148650		A01	109307431	109309578		A01	107823019	107825518		A01	76036955	76039486		A01	37279010	37280857
A01	40282047	40285405		A01	109396080	109398505		A01	107914795	107916205		A01	76358764	76364713		A01	37366948	37367942
A01	40287150	40288328		A01	109405133	109428965		A01	107929864	107930988		A01	76425197	76428016		A01	37542597	37543234
A01	40426197	40429162		A01	109460935	109463223		A01	107960822	107963430		A01	76461600	76464932		A01	37720790	37721791
A01	40724533	40725295		A01	109466718	109470066		A01	108145112	108146964		A01	76507650	76508420		A01	37878106	37881218
A01	41054516	41055176		A01	109477025	109479295		A01	108190332	108191049		A01	76530181	76532048		A01	38030592	38031896
A01	41056473	41057425		A01	109529653	109530607		A01	108446550	108448640		A01	76825865	76826793		A01	38186254	38188408
A01	41059001	41062867		A01	109630307	109633908		A01	108560067	108561379		A01	76836261	76838901		A01	38343417	38344763
A01	41279686	41281676		A01	109645926	109652521		A01	108581478	108583277		A01	77103803	77104711		A01	38424514	38426434
A01	41287052	41288837		A01	109672473	109674461		A01	108652280	108654468		A01	77864580	77866717		A01	38470813	38471523
A01	41382513	41384674		A01	109679597	109680192		A01	108656481	108663437		A01	79573810	79575735		A01	39084738	39085779
A01	41386837	41388200		A01	109704730	109705540		A01	108762441	108764188		A01	80719772	80721061		A01	39094589	39095709
A01	41641487	41644030		A01	109709018	109709587		A01	108799755	108802407		A01	80726622	80727028		A01	39129903	39131153
A01	41670220	41674097		A01	109780833	109781443		A01	108813547	108817125		A01	80869977	80870963		A01	39155121	39156602
A01	41765018	41766886		A01	109798058	109798705		A01	108830278	108831208		A01	80891212	80892427		A01	39272013	39272748
A01	42470683	42474024		A01	109859286	109859892		A01	108843515	108844354		A01	80993355	80994367		A01	39358917	39360356
A01	42489435	42489794		A01	109861399	109867018		A01	108847571	108851535		A01	81095955	81099181		A01	39392143	39393692
A01	42535138	42536557		A01	109938846	109939771		A01	108873020	108877479		A01	81193848	81194611		A01	39431724	39437539
A01	42874837	42878038		A01	109977390	109978020		A01	108879058	108882906		A01	81480155	81480894		A01	39525101	39526663
A01	43923047	43924562		A01	109982556	109983102		A01	108915585	108918689		A01	81489698	81490682		A01	39542541	39545058
A01	43945680	43947692		A01	110052635	110053672		A01	109043471	109044009		A01	81497289	81497945		A01	39611746	39612644
A01	45362420	45363118		A01	110153844	110155250		A01	109115277	109116000		A01	81509390	81510815		A01	39749397	39750707
A01	45386172	45388619		A01	110192558	110193303		A01	109139265	109140743		A01	81517937	81522616		A01	39859190	39859591
A01	45509656	45510416		A01	110241708	110242485		A01	109142304	109145083		A01	82103705	82105026		A01	39876297	39877156
A01	45514630	45515239		A01	110252966	110253554		A01	109169394	109179373		A01	82231306	82232440		A01	39887278	39888520
A01	45549608	45550388		A01	110266794	110267452		A01	109212687	109213949		A01	82234035	82235267		A01	39968683	39969586
A01	45683952	45685515		A01	110270459	110271326		A01	109268886	109271230		A01	82561731	82562533		A01	40076597	40082234
A01	45727431	45732469		A01	110290438	110291078		A01	109276156	109277146		A01	82704177	82705112		A01	40122584	40123762
A01	45758154	45763265		A01	110317889	110322911		A01	109297468	109299323		A01	82706235	82707388		A01	40141606	40142289
A01	45785512	45787164		A01	110364457	110365146		A01	109469321	109470975		A01	82803050	82804888		A01	40147332	40148679
A01	45794497	45795125		A01	110384269	110385049		A01	109472232	109481728		A01	82856126	82858982		A01	40258512	40259527
A01	45819288	45820965		A01	110386620	110387421		A01	109527798	109530672		A01	84126574	84129964		A01	40287151	40288581
A01	45952310	45956018		A01	110405269	110405879		A01	109560345	109563983		A01	84754247	84756255		A01	40293355	40294321
A01	45962113	45963159		A01	110415276	110421737		A01	109591795	109594373		A01	85096328	85097141		A01	40426202	40429315
A01	46185412	46188927		A01	110446002	110462736		A01	109604173	109606539		A01	85761382	85764977		A01	40724510	40726089
A01	46233408	46235106		A01	110507081	110510655		A01	109612926	109617104		A01	85921449	85922261		A01	40748704	40749722
A01	46246689	46247627		A01	110511837	110512689		A01	109675775	109677364		A01	85956278	85959365		A01	40770127	40771073
A01	46250221	46253638		A01	110578321	110579760		A01	109679581	109683632		A01	86035460	86036782		A01	40819395	40820216
A01	46287665	46293047		A01	110585366	110589435		A01	109703460	109705567		A01	86161104	86162269		A01	40841825	40842693
A01	46664462	46666216		A01	110620220	110623623		A01	109707410	109709608		A01	86171890	86172714		A01	41054499	41058599
A01	46924975	46928074		A01	110633848	110652141		A01	109735998	109745627		A01	86212372	86213921		A01	41062012	41062896
A01	46932519	46933513		A01	110753400	110762030		A01	109748744	109750984		A01	86261576	86263493		A01	41280236	41281655
A01	47027676	47028982		A01	110768846	110769644		A01	109753028	109756223		A01	86447253	86449472		A01	41287807	41288860
A01	47228054	47229715		A01	110803365	110804130		A01	109769616	109770124		A01	86562302	86563082		A01	41382515	41384843
A01	48205686	48206985		A01	110938697	110939325		A01	109774198	109781467		A01	86635367	86638328		A01	41386831	41387806
A01	48212873	48214417		A01	111055411	111058103		A01	109798037	109805469		A01	86747081	86748592		A01	41399036	41399817
A01	48254715	48256850		A01	111125472	111126267		A01	109857568	109859894		A01	86832113	86834636		A01	41464384	41465481
A01	49365773	49367043		A01	111143020	111145364		A01	109928735	109931837		A01	86943088	86945868		A01	41475624	41476521
A01	49834563	49836625		A01	111169356	111170155		A01	109937694	109939868		A01	87181393	87182825		A01	41547766	41548119
A01	49838411	49840191		A01	111217498	111218420		A01	109976484	109978023		A01	87561627	87565260		A01	41642962	41643956
A01	50024554	50027934		A01	111281838	111282423		A01	109979475	109983188		A01	87740839	87742847		A01	41669186	41671493
A01	50177625	50179201		A01	111296521	111297060		A01	110073838	110074956		A01	88029322	88032131		A01	41765012	41766166
A01	50269254	50270539		A01	111302680	111307065		A01	110158818	110162513		A01	88118448	88119673		A01	42020042	42020569
A01	50276205	50277516		A01	111330271	111334207		A01	110184345	110188184		A01	88160450	88162349		A01	42021916	42022516
A01	50632468	50633731		A01	111341934	111342696		A01	110190227	110193333		A01	88175911	88177667		A01	42470814	42474027
A01	50741255	50743534		A01	111386858	111395445		A01	110227707	110229132		A01	88215107	88217652		A01	42535139	42536290
A01	50986842	50988575		A01	111400340	111401187		A01	110239894	110242500		A01	88400286	88401748		A01	42873208	42878368
A01	51099781	51106426		A01	111412647	111413326		A01	110266771	110268403		A01	88420458	88421992		A01	45362409	45363361
A01	51115099	51115764		A01	111427038	111427916		A01	110270462	110274909		A01	88569963	88572037		A01	45384229	45384768
A01	51121733	51122566		A01	111536800	111537615		A01	110290423	110291758		A01	88600299	88603675		A01	45385933	45388894
A01	51483971	51484669		A01	111545747	111564146		A01	110299088	110302200		A01	88708167	88710705		A01	45508367	45511496
A01	51795281	51800522		A01	111542271	111544159		A01	110357175	110360044		A01	88867109	88868366		A01	45512728	45515246
A01	51842070	51847940		A01	111596097	111596933		A01	110361234	110365149		A01	88988399	88990619		A01	45549699	45550311
A01	51836767	51840074		A01	111608990	111609771		A01	110381883	110385125		A01	89158345	89162692		A01	45606849	45607733
A01	51848969	51851073		A01	111647972	111648935		A01	110386530	110389990		A01	89175970	89177232		A01	45683986	45684739
A01	51856734	51860627		A01	111652991	111653750		A01	110402096	110405916		A01	89189205	89190988		A01	45726811	45730143
A01	51877360	51878381		A01	111665679	111666671		A01	110429381	110433228		A01	89234894	89235486		A01	45757555	45762981
A01	51992959	51995140		A01	111684516	111685117		A01	110500496	110501977		A01	89436704	89437442		A01	45785509	45787182
A01	52148978	52150759		A01	111686720	111687403		A01	110505252	110512688		A01	89708287	89709173		A01	45819508	45821187
A01	52401597	52402711		A01	111698342	111700138		A01	110515822	110518488		A01	89714007	89715135		A01	45952313	45953641
A01	52404121	52405323		A02	20455	22774		A01	110520388	110522529		A01	89733551	89734993		A01	45961300	45964015
A01	52727383	52732029		A02	38041	54950		A01	110525626	110531613		A01	89745205	89746571		A01	46233675	46235106
A01	53088218	53090884		A02	56429	57375		A01	110578323	110581941		A01	89785412	89787072		A01	46246903	46247605
A01	53158887	53162311		A02	74861	75867		A01	110587766	110588583		A01	89798567	89799523		A01	46252901	46253638
A01	53904871	53906799		A02	79826	80897		A01	110602775	110603349		A01	89802590	89803588		A01	46398323	46398836
A01	54026043	54028371		A02	83779	84626		A01	110618720	110620851		A01	89807840	89810068		A01	46584094	46585141
A01	54359453	54360330		A02	87360	88187		A01	110659923	110662072		A01	90352056	90357498		A01	46924927	46928061
A01	54453154	54453922		A02	97485	98246		A01	110764755	110765995		A01	90361373	90362483		A01	46932493	46933760
A01	54711436	54712380		A02	102343	103082		A01	110780842	110787422		A01	90776091	90778412		A01	47027814	47028946
A01	55450459	55453194		A02	140697	141373		A01	110803406	110807989		A01	90840034	90842496		A01	47219005	47220154
A01	55470532	55471243		A02	145940	146642		A01	110851655	110854960		A01	91069038	91070855		A01	47228565	47229733
A01	57029834	57031170		A02	149667	150583		A01	110858801	110868668		A01	91463175	91464760		A01	47435577	47436411
A01	57802070	57806232		A02	152077	152827		A01	110870472	110871252		A01	91590740	91592753		A01	48205690	48206925
A01	59102685	59107080		A02	158029	158673		A01	110938744	110939411		A01	92257281	92257986		A01	48212720	48214248
A01	59177632	59180118		A02	167248	168166		A01	110944456	110946637		A01	93260173	93261892		A01	48253051	48256818
A01	59318613	59319632		A02	180007	188305		A01	110948189	110950247		A01	93728851	93729665		A01	49834562	49836488
A01	59523230	59525123		A02	191779	192674		A01	110970763	110976246		A01	93940574	93944158		A01	49838437	49839716
A01	60025210	60034376		A02	232329	233099		A01	110980326	110981922		A01	93949609	93950346		A01	50024552	50025362
A01	60057535	60059397		A02	237477	238557		A01	111055018	111056285		A01	93973611	93975397		A01	50033578	50034060
A01	60315148	60316424		A02	245322	246073		A01	111057317	111059087		A01	93982241	93985764		A01	50177583	50178266
A01	60338062	60340797		A02	254079	254672		A01	111125452	111128560		A01	94117184	94118071		A01	50269253	50270557
A01	60383412	60389821		A02	291916	293631		A01	111135776	111138968		A01	94313838	94315021		A01	50632278	50633595
A01	60942152	60946055		A02	311054	311586		A01	111139891	111143842		A01	94362493	94364968		A01	50740822	50744379
A01	61015108	61016934		A02	326221	327478		A01	111144727	111152343		A01	94481370	94485030		A01	50865128	50866120
A01	64149332	64151006		A02	330512	337548		A01	111164294	111170180		A01	94655708	94657221		A01	50986811	50987488
A01	64337644	64341059		A02	338882	349569		A01	111212041	111214523		A01	94667070	94667794		A01	51099710	51102362
A01	65095797	65097346		A02	366103	366942		A01	111215597	111218457		A01	94744735	94745562		A01	51115181	51115797
A01	65353056	65353989		A02	417281	421172		A01	111281815	111282869		A01	95338862	95339848		A01	51121823	51122604
A01	66389230	66390760		A02	460723	461435		A01	111284009	111297098		A01	95689101	95690628		A01	51483985	51484615
A01	66637634	66645035		A02	471778	472828		A01	111341900	111350444		A01	95694289	95696684		A01	51797130	51800281
A01	66677223	66678203		A02	515565	516240		A01	111397768	111401254		A01	95805109	95806167		A01	51805483	51806379
A01	66680756	66684202		A02	551882	552903		A01	111403644	111413365		A01	95850224	95853030		A01	51837561	51839415
A01	66685378	66686239		A02	559419	560055		A01	111417208	111422816		A01	96035947	96037861		A01	51846815	51847979
A01	66923663	66926376		A02	586717	587515		A01	111424513	111427892		A01	96826950	96827579		A01	51850179	51851072
A01	66927668	66929139		A02	603707	604327		A01	111446285	111450015		A01	96927988	96929167		A01	51859599	51861491
A01	66980474	66981096		A02	622323	625515		A01	111458346	111459569		A01	96964789	96969197		A01	51877368	51878355
A01	66983088	66983727		A02	629905	634801		A01	111475783	111482673		A01	96970931	96972198		A01	51992379	51995164
A01	66984846	66986796		A02	651525	652193		A01	111525421	111528114		A01	96984513	96990679		A01	52727380	52727902
A01	67167913	67168942		A02	656222	656756		A01	111531783	111535742		A01	97022440	97025211		A01	53088218	53089274
A01	67716401	67719074		A02	684607	688416		A01	111536753	111539232		A01	97156104	97156636		A01	53158899	53159783
A01	67737836	67739318		A02	694117	699719		A01	111567941	111571502		A01	97167092	97168633		A01	53904807	53906882
A01	67836818	67840504		A02	714351	739648		A01	111593979	111594395		A01	97251464	97254029		A01	54366858	54367105
A01	67963767	67965251		A02	748767	778849		A01	111596108	111615311		A01	97328473	97331364		A01	54452785	54453958
A01	68044963	68046310		A02	791436	808072		A01	111639026	111642439		A01	97387010	97387290		A01	54456801	54457949
A01	68611107	68618998		A02	809206	813422		A01	111644371	111653784		A01	97566521	97567575		A01	54711457	54712236
A01	68663833	68666584		A02	864231	864939		A01	111665642	111670802		A01	97842448	97843150		A01	55450460	55452099
A01	68747492	68750056		A02	873504	874447		A01	111682080	111683765		A01	97957435	97960457		A01	55470487	55471229
A01	68751859	68752727		A02	879800	880578		A01	111684596	111685107		A01	98277906	98279530		A01	55921026	55921984
A01	68839561	68842067		A02	887192	887831		A01	111686715	111694409		A01	98497842	98498642		A01	57805314	57806174
A01	68951231	68956263		A02	895970	896674		A01	111697978	111699991		A01	98507636	98508373		A01	58725373	58725863
A01	68957519	68959552		A02	911074	911730		A01	111724068	111726189		A01	98546161	98548088		A01	58729860	58730589
A01	69222265	69226308		A02	927225	928368		A02	1547	16912		A01	98605884	98608353		A01	59102700	59103651
A01	69726359	69730191		A02	1009419	1010222		A02	17784	34474		A01	98671344	98673718		A01	59177676	59178526
A01	69754605	69755053		A02	1029080	1030082		A02	51946	52883		A01	98675901	98679880		A01	59318303	59319637
A01	69771540	69773669		A02	1073906	1074427		A02	68838	71227		A01	98753515	98758106		A01	59333982	59335076
A01	69935860	69937292		A02	1076579	1077263		A02	56315	67799		A01	98831676	98837050		A01	59609485	59610262
A01	70219140	70222072		A02	1085583	1092833		A02	74818	77587		A01	98915451	98915756		A01	59998292	59999349
A01	70234823	70236426		A02	1123461	1124243		A02	83742	86223		A01	98921450	98927008		A01	60028023	60028735
A01	70495985	70497708		A02	1126565	1129050		A02	87243	90767		A01	98964094	98971886		A01	60029785	60031663
A01	70578736	70582644		A02	1141990	1144610		A02	92443	93780		A01	98975337	98976670		A01	60058453	60059412
A01	71509773	71514755		A02	1155303	1156784		A02	97480	103142		A01	99124237	99127532		A01	60314708	60316575
A01	71842223	71845046		A02	1205911	1206507		A02	140640	143029		A01	99254132	99255490		A01	60338067	60339050
A01	72030340	72031026		A02	1213554	1214164		A02	144196	146688		A01	99265513	99266560		A01	60383443	60384380
A01	72059574	72060907		A02	1217510	1218255		A02	147802	150643		A01	99269853	99272260		A01	60944543	60946059
A01	72602813	72604402		A02	1230193	1240025		A02	152062	155117		A01	99647152	99648283		A01	61015245	61017718
A01	72608195	72610936		A02	1326230	1327015		A02	157980	158899		A01	99800792	99801544		A01	61092684	61093450
A01	72613541	72617256		A02	1462976	1463574		A02	167201	173841		A01	99929104	99930270		A01	64149351	64150990
A01	72629339	72631409		A02	1483324	1483969		A02	190332	192678		A01	99931436	99936172		A01	64340007	64341057
A01	73126614	73130014		A02	1518982	1519760		A02	199151	201082		A01	100035789	100040862		A01	65094268	65097332
A01	73695871	73698955		A02	1535462	1536227		A02	217916	219044		A01	100043300	100045901		A01	66389663	66391420
A01	73964226	73964817		A02	1546514	1547149		A02	228372	233127		A01	100047021	100049402		A01	66637643	66638641
A01	74267171	74269408		A02	1564249	1565011		A02	234498	238404		A01	100122468	100123567		A01	66641201	66642786
A01	74275016	74278819		A02	1596934	1598255		A02	245285	251860		A01	100307021	100309075		A01	66677238	66678200
A01	74953088	74955956		A02	1615780	1622534		A02	254060	260093		A01	100311274	100315584		A01	66681102	66684145
A01	75102472	75103024		A02	1648156	1661524		A02	261191	262064		A01	100325755	100326757		A01	66685316	66686254
A01	75131461	75133541		A02	1708592	1730551		A02	277628	279636		A01	100360962	100361817		A01	66923666	66929197
A01	75226303	75228134		A02	1760864	1761863		A02	311028	312282		A01	100367367	100368542		A01	66983063	66983707
A01	75390065	75391093		A02	1852298	1855339		A02	314078	317017		A01	100404479	100408531		A01	66985248	66986828
A01	75616405	75617984		A02	1860641	1862574		A02	326281	327387		A01	100456367	100457533		A01	67167951	67168833
A01	75646970	75648586		A02	1904805	1905959		A02	366092	377452		A01	100540119	100543420		A01	67738190	67739302
A01	75655843	75656261		A02	1957526	1958560		A02	451977	453873		A01	100616785	100618996		A01	68047434	68051301
A01	75814584	75815818		A02	1984785	1994384		A02	457263	461448		A01	100701647	100709141		A01	68611996	68614874
A01	75923499	75924511		A02	1997451	2007332		A02	471710	475437		A01	100737517	100741788		A01	68618197	68618995
A01	75934711	75935576		A02	2031247	2039179		A02	478061	481086		A01	100772980	100777471		A01	68663819	68665167
A01	76037785	76041238		A02	2065298	2080828		A02	488300	490581		A01	100845624	100846529		A01	68841272	68843696
A01	76359013	76364778		A02	2093069	2120317		A02	514056	516277		A01	100904788	100907272		A01	68951252	68952437
A01	76425174	76427612		A02	2161915	2168105		A02	518867	522200		A01	100997391	100998701		A01	68957519	68958562
A01	76462506	76464901		A02	2200866	2205034		A02	542799	543323		A01	101179932	101180617		A01	69706491	69707378
A01	76507641	76508479		A02	2220936	2221747		A02	551885	554739		A01	101375221	101376436		A01	69726355	69730580
A01	76530170	76531733		A02	2300690	2305226		A02	557325	560080		A01	101451233	101452827		A01	69754563	69755152
A01	76825865	76827237		A02	2363030	2363546		A02	603703	606401		A01	101498299	101498907		A01	69771484	69775155
A01	76836230	76838454		A02	2367571	2376701		A02	634178	636655		A01	101561838	101564146		A01	69935860	69937851
A01	77102902	77104888		A02	2402274	2410258		A02	639658	645239		A01	101600812	101601593		A01	70221403	70222077
A01	77863231	77866728		A02	2413522	2423364		A02	646225	648468		A01	101636461	101637227		A01	70235614	70236412
A01	79573813	79574934		A02	2428551	2432052		A02	651482	653746		A01	101644673	101648626		A01	70495429	70497713
A01	80052187	80053020		A02	2438402	2446832		A02	656188	659538		A01	101654288	101654591		A01	70578759	70580210
A01	80358271	80361813		A02	2475601	2476153		A02	854506	859539		A01	101663888	101666728		A01	71509825	71510611
A01	80538311	80540190		A02	2514320	2515595		A02	860955	865318		A01	101669579	101670124		A01	71842196	71844517
A01	80717633	80721090		A02	2543446	2543938		A02	877200	880642		A01	101680842	101681654		A01	72030217	72031136
A01	80726621	80727073		A02	2554054	2554927		A02	887148	890643		A01	101711535	101713121		A01	72059541	72060916
A01	80891196	80893932		A02	2563734	2564376		A02	892452	896735		A01	101715289	101719034		A01	72072638	72075128
A01	81076521	81080020		A02	2667884	2671353		A02	905337	910039		A01	101754074	101754993		A01	72613481	72618423
A01	81095954	81097245		A02	2676967	2685508		A02	911057	913874		A01	101843885	101844845		A01	72629339	72630020
A01	81193848	81197531		A02	2858556	2863103		A02	969228	972822		A01	101846064	101847354		A01	73695800	73697069
A01	81480131	81484028		A02	2865877	2872482		A02	978744	984399		A01	101849429	101852293		A01	73941952	73943091
A01	81485956	81487832		A02	2915637	2916480		A02	991461	995664		A01	102002907	102003809		A01	73947727	73950015
A01	81508791	81510726		A02	2936033	2936700		A02	1009393	1018075		A01	102027741	102028787		A01	74267200	74267804
A01	81515584	81522645		A02	3121017	3122206		A02	1029134	1033183		A01	102033821	102034210		A01	74274663	74276838
A01	82092518	82105025		A02	3125841	3126742		A02	1046104	1047210		A01	102062413	102066494		A01	74953004	74957385
A01	82231311	82234951		A02	3140089	3140867		A02	1069907	1074450		A01	102105475	102106461		A01	75100717	75103040
A01	82518906	82519926		A02	3174616	3175073		A02	1076587	1080704		A01	102126195	102126909		A01	75389833	75391121
A01	82561720	82562554		A02	3257586	3258268		A02	1085658	1086646		A01	102130307	102133284		A01	75633478	75634606
A01	82704194	82705129		A02	3324807	3331213		A02	1091180	1092900		A01	102139158	102140107		A01	75646975	75648924
A01	82706261	82707444		A02	3338334	3339155		A02	1108119	1111330		A01	102196542	102199495		A01	75814618	75815883
A01	82802989	82804733		A02	3366300	3376443		A02	1122746	1124315		A01	102210884	102213130		A01	75930361	75930967
A01	82856480	82859007		A02	3385365	3398055		A02	1155249	1157038		A01	102220954	102221506		A01	75934711	75935744
A01	84126527	84129643		A02	3467146	3468097		A02	1215773	1218262		A01	102231152	102232199		A01	76037684	76039328
A01	85091285	85097160		A02	3519135	3519734		A02	1326210	1333292		A01	102239207	102241535		A01	76358910	76362268
A01	85761373	85764982		A02	3529391	3529933		A02	1376195	1377724		A01	102245181	102246322		A01	76363704	76364829
A01	85787305	85787897		A02	3576340	3577112		A02	1379806	1381896		A01	102266164	102267884		A01	76425181	76428012
A01	85921434	85924220		A02	3591586	3592362		A02	1483314	1483995		A01	102451900	102453875		A01	76461856	76465031
A01	85939982	85947159		A02	3601703	3602468		A02	1509067	1512825		A01	102536825	102537341		A01	76507650	76508418
A01	85957317	85959242		A02	3612127	3612895		A02	1518978	1520394		A01	102548702	102549406		A01	76530163	76531761
A01	86034690	86036864		A02	3624168	3624689		A02	1521431	1523099		A01	102553183	102554047		A01	76825865	76826825
A01	86161046	86162225		A02	3651148	3651886		A02	1524809	1529963		A01	102593835	102594383		A01	76836247	76838454
A01	86171497	86172753		A02	3703859	3705013		A02	1535474	1538745		A01	102605602	102607959		A01	77102462	77104829
A01	86209300	86213985		A02	3709608	3710402		A02	1546463	1553228		A01	102608843	102613666		A01	77865249	77866726
A01	86262498	86269749		A02	3739443	3740008		A02	1563791	1565030		A01	102679657	102681657		A01	79573793	79575735
A01	86328245	86328873		A02	3747778	3748260		A02	1591816	1594516		A01	102692010	102692759		A01	80360098	80361799
A01	86330006	86331927		A02	3769771	3773498		A02	1663027	1672251		A01	102754531	102755356		A01	80538272	80539627
A01	86447287	86449445		A02	3814045	3814701		A02	1700100	1703695		A01	102779628	102782041		A01	80719739	80721092
A01	86562286	86563647		A02	3849426	3850584		A02	1745626	1746333		A01	102857542	102858786		A01	80726598	80727042
A01	86636404	86638354		A02	3858441	3858935		A02	1759353	1761948		A01	102873894	102876904		A01	80870137	80870974
A01	86746136	86747697		A02	3877497	3878319		A02	1764013	1765653		A01	103007444	103008440		A01	80891205	80892258
A01	86832980	86834644		A02	3915748	3917464		A02	1873011	1873692		A01	103052809	103064570		A01	80993275	80994368
A01	86939879	86945342		A02	3924140	3924910		A02	1904732	1906644		A01	103125506	103126371		A01	81076561	81077515
A01	87166231	87167434		A02	4033118	4041159		A02	1957517	1961260		A01	103136689	103139109		A01	81095958	81099148
A01	87178574	87182883		A02	4059873	4069827		A02	2132741	2135871		A01	103142250	103143345		A01	81193847	81194611
A01	87740392	87744388		A02	4073353	4074163		A02	2139438	2140923		A01	103226270	103231676		A01	81480153	81480884
A01	88034407	88037016		A02	4081825	4082565		A02	2176076	2178414		A01	103276340	103279165		A01	81497243	81497973
A01	88114295	88115736		A02	4086435	4087083		A02	2191523	2194394		A01	103287948	103289614		A01	81509411	81510834
A01	88118247	88119679		A02	4124968	4125604		A02	2219661	2221784		A01	103377035	103378768		A01	81520933	81522653
A01	88120996	88121735		A02	4179382	4180445		A02	2242190	2243596		A01	103456683	103457555		A01	82103964	82105044
A01	88160425	88162199		A02	4204148	4218740		A02	2247504	2249842		A01	103491031	103491920		A01	82231306	82235247
A01	88175955	88177666		A02	4319933	4337868		A02	2255566	2264555		A01	103545540	103546200		A01	82561743	82562576
A01	88215142	88218435		A02	4431362	4440053		A02	2267595	2273497		A01	103559088	103560897		A01	82704133	82705112
A01	88400379	88401341		A02	4564839	4569735		A02	2446088	2447895		A01	103704011	103705161		A01	82706260	82707423
A01	88420505	88424392		A02	4594452	4594954		A02	2460788	2468584		A01	103709922	103712317		A01	82802976	82804867
A01	88564101	88566482		A02	4624842	4629711		A02	2470678	2474278		A01	103747123	103750308		A01	82856122	82859011
A01	88567609	88571636		A02	4781726	4782370		A02	2475553	2476795		A01	103836510	103837700		A01	84126541	84129983
A01	88600278	88603598		A02	4844284	4844907		A02	2543329	2548567		A01	103863793	103864404		A01	84753951	84756141
A01	88709590	88710674		A02	4866506	4867220		A02	2550579	2554933		A01	103870425	103873916		A01	85096126	85097127
A01	88839041	88844977		A02	4874391	4875222		A02	2557875	2560785		A01	103956664	103957600		A01	85761329	85764986
A01	88867110	88868330		A02	4879753	4889396		A02	2563686	2569830		A01	103963275	103963642		A01	85921431	85922261
A01	88988644	88990583		A02	4937248	4937984		A02	2884747	2886713		A01	103967484	103968397		A01	85940018	85941612
A01	89109662	89111455		A02	4953176	4953674		A02	2910302	2916488		A01	103981301	103983407		A01	85957413	85959352
A01	89158391	89162697		A02	5002615	5003298		A02	3065591	3071147		A01	103984377	103987862		A01	86035570	86036691
A01	89175967	89177705		A02	5058099	5063696		A02	3087638	3093816		A01	103989119	103990449		A01	86161094	86162235
A01	89189216	89190929		A02	5158078	5161922		A02	3111223	3116601		A01	104087124	104091752		A01	86171899	86172724
A01	89234848	89235508		A02	5201343	5208196		A02	3117972	3122345		A01	104114203	104115125		A01	86212289	86213968
A01	89435408	89437450		A02	5320190	5324565		A02	3140034	3141392		A01	104130691	104133604		A01	86261743	86263606
A01	89710017	89715135		A02	5338037	5338653		A02	3152261	3161296		A01	104166515	104167133		A01	86328263	86328819
A01	89725335	89728386		A02	5374344	5375297		A02	3180960	3182338		A01	104265110	104266380		A01	86330123	86332056
A01	89733489	89734998		A02	5387360	5388116		A02	3188393	3190468		A01	104275232	104276370		A01	86346993	86348131
A01	89745160	89746579		A02	5400775	5401396		A02	3191698	3194178		A01	104277349	104278324		A01	86447219	86449484
A01	89785454	89786870		A02	5419474	5424715		A02	3254815	3259440		A01	104394419	104396010		A01	86551797	86553389
A01	89802567	89805161		A02	5472235	5473609		A02	3302953	3303335		A01	104512023	104518002		A01	86562285	86563087
A01	89979354	89981983		A02	5574687	5579562		A02	3338286	3341456		A01	104522034	104523703		A01	86636601	86638329
A01	90352117	90355678		A02	5582729	5583537		A02	3389565	3390214		A01	104530135	104536058		A01	86746997	86747854
A01	90357596	90362491		A02	5644802	5646599		A02	3463657	3468101		A01	104626766	104630104		A01	86832330	86834655
A01	90776807	90780425		A02	5924619	5925987		A02	3528046	3530011		A01	104656974	104657590		A01	86943200	86946474
A01	90840033	90842423		A02	5996248	5997110		A02	3543628	3550173		A01	104668915	104669410		A01	86948110	86950247
A01	91069111	91070976		A02	6007495	6016072		A02	3559082	3562416		A01	104704104	104704665		A01	87166228	87166976
A01	91277713	91278320		A02	6034162	6041944		A02	3567758	3573395		A01	104731239	104731863		A01	87181384	87182855
A01	91279391	91281726		A02	6068172	6071821		A02	3576305	3583746		A01	104744804	104745420		A01	87561672	87565132
A01	91463970	91464760		A02	6088450	6098593		A02	3585515	3592237		A01	104748592	104750469		A01	87740862	87742900
A01	92256018	92258018		A02	6111283	6111877		A02	3601779	3606032		A01	104760609	104763045		A01	88029353	88032408
A01	93260198	93261960		A02	6113179	6121157		A02	3612097	3621298		A01	104771106	104774051		A01	88114687	88115710
A01	93640021	93641927		A02	6180324	6180947		A02	3692727	3695617		A01	104778282	104779187		A01	88118378	88119715
A01	93728831	93729637		A02	6185910	6188734		A02	3707745	3710404		A01	104783324	104784921		A01	88160445	88162305
A01	93941094	93944058		A02	6194254	6194918		A02	3739448	3745987		A01	104900533	104902369		A01	88175886	88177651
A01	93945694	93950362		A02	6321650	6330587		A02	3747723	3750916		A01	104934919	104935987		A01	88215128	88218342
A01	93973987	93975353		A02	6370340	6373185		A02	3752251	3754079		A01	105141384	105149996		A01	88400299	88401690
A01	93982447	93992071		A02	6385184	6385872		A02	3814044	3816791		A01	105156469	105158266		A01	88420481	88421987
A01	94153377	94155195		A02	6456074	6465283		A02	3858442	3862457		A01	105205201	105207013		A01	88569367	88571544
A01	94313917	94315045		A02	6578063	6585720		A02	3874555	3878343		A01	105226306	105227405		A01	88600297	88601600
A01	94362832	94365002		A02	6609823	6612357		A02	3910564	3913872		A01	105236063	105236625		A01	88603071	88603652
A01	94481355	94484936		A02	6707603	6708233		A02	3917942	3919702		A01	105229661	105234448		A01	88630547	88630978
A01	94606565	94608035		A02	6710597	6711299		A02	3957730	3960356		A01	105298469	105299477		A01	88708482	88710642
A01	94655688	94660426		A02	6786171	6786710		A02	3991632	3993843		A01	105322498	105323661		A01	88841700	88844932
A01	94667142	94667834		A02	6808545	6816997		A02	4012405	4015818		A01	105337616	105338835		A01	88867145	88868306
A01	94686558	94688631		A02	6908729	6916361		A02	4081016	4083543		A01	105349726	105351744		A01	88988453	88990842
A01	94759713	94760252		A02	6966173	6966652		A02	4085023	4087184		A01	105412775	105413523		A01	89158370	89162690
A01	94823055	94825357		A02	6992341	6992983		A02	4093034	4093550		A01	105462722	105463233		A01	89168270	89168804
A01	94829410	94831734		A02	7005191	7005686		A02	4124946	4125664		A01	105491546	105492177		A01	89175970	89176927
A01	95069582	95071846		A02	7050056	7051098		A02	4169531	4170669		A01	105511716	105512960		A01	89189216	89190914
A01	95339069	95342200		A02	7059583	7064276		A02	4183827	4185646		A01	105563261	105563998		A01	89234958	89235507
A01	95604405	95605543		A02	7157051	7157596		A02	4193747	4202143		A01	105570149	105570824		A01	89436706	89437451
A01	95689554	95690645		A02	7198138	7204770		A02	4321412	4321961		A01	105627581	105630839		A01	89714095	89715135
A01	95693323	95696633		A02	7239555	7240208		A02	4478551	4481847		A01	105652165	105653092		A01	89745202	89746561
A01	95805143	95806118		A02	7588824	7589654		A02	4527215	4528130		A01	105717307	105718070		A01	89785394	89786884
A01	96036076	96037740		A02	7621473	7623777		A02	4535158	4539458		A01	105808919	105809930		A01	89802578	89803605
A01	96039509	96040707		A02	7633562	7634286		A02	4541974	4543330		A01	105849624	105852588		A01	89808652	89810030
A01	96575840	96577067		A02	7756130	7760230		A02	4572745	4573698		A01	105861040	105863208		A01	90352041	90353353
A01	96826965	96828665		A02	7761479	7762106		A02	4836857	4841447		A01	105865205	105870035		A01	90361392	90362465
A01	96927988	96929501		A02	7767345	7768155		A02	4864751	4867375		A01	105871788	105874773		A01	90776860	90778312
A01	96968875	96972222		A02	7779647	7781327		A02	4874378	4877963		A01	105876815	105877259		A01	90840034	90842022
A01	96985732	96991064		A02	7789444	7790036		A02	4895523	4900269		A01	105997903	105999627		A01	91068996	91070984
A01	97022257	97024654		A02	7795709	7800918		A02	4933404	4938028		A01	106009655	106015340		A01	91280539	91281700
A01	97135210	97137913		A02	7802866	7807335		A02	4952031	4953720		A01	106050331	106052320		A01	91463213	91464861
A01	97156076	97157059		A02	7811837	7814243		A02	4994062	5000332		A01	106076827	106077870		A01	91591318	91593699
A01	97167053	97169086		A02	7907661	7936961		A02	5001859	5003300		A01	106082450	106083038		A01	91654227	91655322
A01	97251599	97253777		A02	7950253	7952748		A02	5189647	5190435		A01	106084211	106084626		A01	92257286	92257985
A01	97329067	97331227		A02	7987208	7987721		A02	5280628	5283984		A01	106101846	106108754		A01	93728753	93729665
A01	97386959	97387293		A02	8089684	8099606		A02	5289994	5292308		A01	106116847	106117772		A01	93940628	93944159
A01	97839649	97843139		A02	8136037	8136644		A02	5323821	5327155		A01	106131121	106131697		A01	93949727	93950316
A01	97957424	97958931		A02	8142245	8144660		A02	5337887	5338626		A01	106139284	106140753		A01	93974599	93975311
A01	98004916	98005623		A02	8150098	8154222		A02	5372964	5375334		A01	106250533	106251846		A01	93982295	93985774
A01	98277908	98279415		A02	8244221	8246727		A02	5378671	5381074		A01	106424226	106424672		A01	94117050	94118072
A01	98497904	98499477		A02	8253649	8254428		A02	5386317	5388126		A01	106468660	106469275		A01	94154051	94155183
A01	98507614	98508330		A02	8261174	8262138		A02	5397640	5398210		A01	106483366	106485453		A01	94313909	94315045
A01	98533143	98533757		A02	8264153	8265025		A02	5446305	5448129		A01	106487768	106488832		A01	94361800	94364993
A01	98550829	98551525		A02	8390416	8392349		A02	5455141	5456903		A01	106505090	106505612		A01	94481331	94485246
A01	98603603	98608619		A02	8468699	8469677		A02	5459467	5462868		A01	106536882	106537564		A01	94607094	94608046
A01	98671586	98673717		A02	8575035	8575841		A02	5472149	5473447		A01	106584124	106585023		A01	94655688	94657247
A01	98676283	98679890		A02	8720533	8721417		A02	5581288	5583595		A01	106608332	106609496		A01	94667084	94667855
A01	98681417	98684457		A02	8806373	8807361		A02	5896906	5901981		A01	106646963	106647636		A01	94744725	94745513
A01	98753492	98755595		A02	8821293	8822034		A02	5924616	5925946		A01	106685734	106687231		A01	94823135	94824002
A01	98829076	98829902		A02	9091125	9092261		A02	6005681	6009049		A01	106804708	106807696		A01	94829208	94831772
A01	98831664	98835268		A02	9095533	9096356		A02	6019091	6019872		A01	106907182	106907905		A01	94990173	94991015
A01	98839216	98842809		A02	9155158	9155879		A02	6071230	6076582		A01	106939792	106941010		A01	95181840	95182498
A01	98964483	98966926		A02	9170715	9171359		A02	6109237	6111906		A01	106960831	106961668		A01	95339052	95339847
A01	98974212	98976683		A02	9187397	9188071		A02	6174450	6181032		A01	106978927	106982356		A01	95689487	95690637
A01	99124452	99127506		A02	9360414	9361293		A02	6192647	6194947		A01	107017206	107018527		A01	95694639	95696666
A01	99254086	99260619		A02	9365500	9367416		A02	6196143	6200958		A01	107036875	107037565		A01	95805124	95806128
A01	99264788	99266591		A02	9380314	9381152		A02	6223428	6229631		A01	107111156	107112184		A01	95850359	95852786
A01	99268294	99271845		A02	9386800	9387637		A02	6260942	6262507		A01	107116911	107118646		A01	96035868	96037874
A01	99631787	99635182		A02	9398509	9400604		A02	6382553	6385910		A01	107120068	107120623		A01	96260407	96261258
A01	99647139	99651030		A02	9405731	9406465		A02	6680931	6691535		A01	107126647	107128033		A01	96927988	96929254
A01	99746300	99752866		A02	9443598	9445854		A02	6702553	6704554		A01	107128964	107130774		A01	96964771	96968716
A01	99800861	99801576		A02	9453330	9454385		A02	6706774	6708306		A01	107149193	107152470		A01	96971035	96972221
A01	99875836	99877287		A02	9511140	9511922		A02	6709686	6711317		A01	107154692	107156143		A01	96984713	96985965
A01	99929096	99930718		A02	9585522	9586367		A02	6812121	6812681		A01	107172226	107174246		A01	96987019	96990702
A01	99932309	99934567		A02	9688834	9689830		A02	6831940	6837812		A01	107198577	107199741		A01	97022293	97024722
A01	100003886	100005444		A02	9772763	9774114		A02	6966126	6966639		A01	107201068	107203293		A01	97128072	97128473
A01	100036978	100038372		A02	9799531	9810140		A02	6977868	6981152		A01	107204956	107205775		A01	97156098	97157032
A01	100120519	100123559		A02	9824771	9825558		A02	6984636	6988615		A01	107228341	107229661		A01	97167104	97168640
A01	100233499	100235254		A02	9876308	9876979		A02	6991349	6993048		A01	107243620	107244481		A01	97251866	97254025
A01	100312570	100316790		A02	9993084	9996278		A02	7005154	7010039		A01	107323747	107324975		A01	97328519	97331388
A01	100319359	100321048		A02	9999963	10000927		A02	7050048	7052449		A01	107357390	107358165		A01	97386937	97387340
A01	100322808	100326724		A02	10015868	10016353		A02	7214155	7219669		A01	107364408	107370102		A01	97566514	97567532
A01	100360984	100363146		A02	10266850	10267616		A02	7239535	7241279		A01	107371009	107374793		A01	97842015	97843160
A01	100365105	100366083		A02	10303578	10304355		A02	7532347	7534980		A01	107391253	107391831		A01	97957399	97959121
A01	100367299	100372136		A02	10326257	10327152		A02	7586632	7589654		A01	107448577	107449510		A01	98277940	98279388
A01	100404763	100407540		A02	10491328	10492211		A02	7633563	7636314		A01	107455188	107458750		A01	98497914	98498820
A01	100448161	100451500		A02	10595084	10595934		A02	7755187	7756832		A01	107478159	107481529		A01	98507600	98508362
A01	100453732	100457554		A02	10606741	10607525		A02	7761480	7763620		A01	107482732	107483433		A01	98533168	98533867
A01	100502544	100506017		A02	10676513	10677086		A02	7767310	7776220		A01	107492104	107492959		A01	98546226	98549275
A01	100535144	100542123		A02	10721763	10722600		A02	7787594	7790131		A01	107534499	107535972		A01	98605773	98608318
A01	100617024	100619019		A02	10829330	10835214		A02	7855931	7860957		A01	107705030	107705746		A01	98671332	98673723
A01	100631680	100633107		A02	11062170	11063506		A02	7980455	7983704		A01	107742815	107745704		A01	98676217	98680026
A01	100695247	100709364		A02	11106620	11108327		A02	8011230	8013736		A01	107770855	107775748		A01	98753460	98755305
A01	100738708	100741840		A02	11215662	11216610		A02	8046681	8047491		A01	107820127	107821253		A01	98756908	98758157
A01	100772996	100774688		A02	11271631	11272612		A02	8130755	8133520		A01	107824282	107826481		A01	98764196	98764758
A01	100845644	100848722		A02	11300263	11300855		A02	8134487	8136658		A01	107863768	107864448		A01	98831676	98837019
A01	100906294	100907758		A02	11437967	11442444		A02	8245962	8254473		A01	107875134	107875841		A01	98915394	98915829
A01	100982188	100984648		A02	11448229	11455978		A02	8259935	8262187		A01	107914759	107915975		A01	98921451	98926438
A01	100996475	100998618		A02	11659046	11659711		A02	8263355	8265057		A01	107926778	107931021		A01	98964174	98971433
A01	101179947	101180621		A02	11687703	11688381		A02	8269734	8274014		A01	107934071	107935926		A01	98974224	98976668
A01	101375213	101376944		A02	11693535	11694622		A02	8390370	8394029		A01	107960377	107963396		A01	99085376	99086191
A01	101449966	101452831		A02	11749563	11752134		A02	8400614	8405002		A01	108145135	108146932		A01	99124343	99127534
A01	101498301	101498896		A02	11771226	11773715		A02	8466216	8469677		A01	108190409	108191064		A01	99254080	99255463
A01	101509195	101512802		A02	11775797	11776683		A02	8568978	8575923		A01	108447582	108448618		A01	99265479	99266591
A01	101561836	101563719		A02	11872005	11873279		A02	8659784	8662259		A01	108456375	108457861		A01	99269927	99271903
A01	101572043	101574203		A02	12035810	12036809		A02	8683093	8689883		A01	108558983	108562221		A01	99647143	99648319
A01	101605881	101607906		A02	12125265	12126053		A02	8707530	8710259		A01	108578782	108579312		A01	99749985	99753044
A01	101646484	101649026		A02	12171157	12172132		A02	8714336	8721455		A01	108580702	108583407		A01	99745532	99749007
A01	101650258	101652734		A02	12214724	12222527		A02	8751013	8752668		A01	108652267	108652941		A01	99800788	99801561
A01	101654300	101654581		A02	12270823	12273256		A02	8762312	8776455		A01	108661701	108663467		A01	99836038	99837530
A01	101664902	101666806		A02	12284730	12285530		A02	8788551	8791020		A01	108719156	108719833		A01	99929096	99930313
A01	101680856	101684412		A02	12449583	12451770		A02	8799440	8802093		A01	108762023	108764131		A01	99932170	99936095
A01	101716718	101718484		A02	12628376	12631615		A02	8804034	8807410		A01	108767265	108768906		A01	100003839	100004799
A01	101711571	101715512		A02	13070431	13071445		A02	8819483	8822045		A01	108779117	108780101		A01	100033329	100040862
A01	101783392	101786525		A02	13076415	13079589		A02	9089840	9092276		A01	108799735	108800758		A01	100043303	100045920
A01	101843885	101844850		A02	13124879	13125572		A02	9093480	9096438		A01	108813518	108814060		A01	100122406	100123557
A01	101846070	101847867		A02	13163046	13170902		A02	9152981	9155910		A01	108830241	108831209		A01	100307006	100308442
A01	101854326	101856623		A02	13195314	13203270		A02	9164227	9171448		A01	108843375	108844425		A01	100311755	100315527
A01	101934047	101936152		A02	13282381	13283085		A02	9187289	9193070		A01	108873030	108875358		A01	100320299	100321010
A01	102002860	102003683		A02	13715175	13716447		A02	9199676	9204242		A01	108876696	108877508		A01	100325716	100326692
A01	102013054	102014952		A02	13755496	13756578		A02	9352450	9361276		A01	108878863	108879727		A01	100360975	100361928
A01	102025172	102028789		A02	13763073	13763820		A02	9365241	9370069		A01	108907564	108908385		A01	100365070	100366262
A01	102030839	102034292		A02	13874875	13875749		A02	9380287	9383736		A01	108917623	108919710		A01	100387852	100388729
A01	102064225	102066423		A02	13886306	13887235		A02	9452063	9454500		A01	108928428	108929173		A01	100404501	100408531
A01	102103890	102106448		A02	14250500	14251232		A02	9511074	9516477		A01	109043427	109044045		A01	100447403	100449819
A01	102132078	102133272		A02	14256471	14257471		A02	9585510	9587455		A01	109114602	109115913		A01	100456449	100457542
A01	102139189	102139960		A02	14489738	14490418		A02	9772762	9774321		A01	109135412	109136005		A01	100540092	100543567
A01	102142533	102146433		A02	14624156	14625193		A02	9799976	9801108		A01	109139251	109140564		A01	100616818	100619020
A01	102152841	102154652		A02	14660354	14660824		A02	9824728	9827182		A01	109144169	109145081		A01	100701598	100709079
A01	102198152	102198960		A02	14750000	14753444		A02	9828485	9833789		A01	109178788	109181074		A01	100740522	100741812
A01	102210997	102213152		A02	14754643	14762351		A02	9852393	9853112		A01	109268545	109271466		A01	100772979	100774515
A01	102220979	102222133		A02	15002684	15003350		A02	9880525	9883004		A01	109276142	109277294		A01	100775543	100777434
A01	102227364	102228767		A02	15007717	15013277		A02	9985356	9987527		A01	109297463	109299509		A01	100790823	100793178
A01	102239198	102241488		A02	15027449	15028846		A02	9997570	10000930		A01	109304873	109305592		A01	100904878	100907975
A01	102245264	102246478		A02	15217012	15218047		A02	10032723	10042143		A01	109477015	109478979		A01	100997400	100998702
A01	102266002	102269829		A02	15384592	15385432		A02	10065018	10069247		A01	109560335	109563964		A01	101162349	101162969
A01	102289354	102291270		A02	15548338	15555247		A02	10084979	10092868		A01	109566606	109571954		A01	101179932	101180536
A01	102452234	102454609		A02	15624554	15636666		A02	10203508	10210347		A01	109604182	109605905		A01	101375196	101376381
A01	102458840	102460478		A02	15670607	15671588		A02	10266838	10268413		A01	109612809	109614198		A01	101386435	101387542
A01	102536820	102538826		A02	15673541	15674500		A02	10301892	10304438		A01	109676267	109677376		A01	101451180	101452829
A01	102548315	102549442		A02	15983953	15984825		A02	10320369	10322921		A01	109679528	109681002		A01	101498296	101498925
A01	102553196	102558967		A02	16213686	16219366		A02	10326112	10327205		A01	109704512	109705607		A01	101561620	101564154
A01	102569020	102571182		A02	16233685	16238209		A02	10494431	10501171		A01	109708897	109709610		A01	101600860	101601615
A01	102593837	102594990		A02	16564325	16565067		A02	10529542	10531034		A01	109748717	109750597		A01	101634830	101637204
A01	102605582	102606855		A02	16818682	16819673		A02	10549099	10552460		A01	109769614	109770136		A01	101646515	101647511
A01	102608093	102613661		A02	16988271	16989167		A02	10594246	10595953		A01	109780569	109781470		A01	101654291	101654594
A01	102684278	102686078		A02	16993562	16994536		A02	10606741	10617942		A01	109798022	109798941		A01	101664800	101666764
A01	102688163	102689196		A02	17309047	17309914		A02	10622414	10636231		A01	109854983	109856243		A01	101669572	101670155
A01	102754608	102755350		A02	17354005	17354994		A02	10637545	10648569		A01	109857234	109859894		A01	101680811	101681575
A01	102779499	102781955		A02	17368071	17368582		A02	10657787	10660449		A01	109880788	109885097		A01	101711522	101713108
A01	102787673	102788808		A02	17433174	17437549		A02	10676085	10677092		A01	109907654	109909052		A01	101716141	101717910
A01	102818059	102822000		A02	17865196	17866168		A02	10691157	10694136		A01	109922301	109925103		A01	101754322	101755011
A01	102857542	102858798		A02	18071965	18072731		A02	10721667	10724439		A01	109929786	109931931		A01	101783392	101784005
A01	102874822	102876896		A02	18242188	18243132		A02	10755164	10764374		A01	109938715	109939924		A01	101843876	101844871
A01	103004151	103008197		A02	18303149	18304085		A02	10872486	10873243		A01	109945345	109946327		A01	101846045	101847494
A01	103060286	103064601		A02	18482857	18483492		A02	11065663	11068122		A01	109977056	109979488		A01	101849502	101852251
A01	103073369	103078320		A02	18519429	18520164		A02	11172845	11174294		A01	109982237	109983185		A01	102002939	102003797
A01	103103394	103108281		A02	18536585	18537459		A02	11215633	11217558		A01	110016277	110018238		A01	102027825	102028788
A01	103123084	103126381		A02	18712762	18713709		A02	11271297	11272612		A01	110073834	110074956		A01	102033701	102034211
A01	103137512	103138855		A02	19079301	19090857		A02	11323693	11324575		A01	110109286	110113562		A01	102065330	102066331
A01	103140806	103143352		A02	19185879	19194405		A02	11651713	11659746		A01	110142785	110145597		A01	102068901	102069566
A01	103223392	103224848		A02	19196675	19197163		A02	11687636	11691578		A01	110151520	110151897		A01	102080051	102080654
A01	103226237	103231852		A02	19417109	19419812		A02	11693436	11696124		A01	110153850	110155916		A01	102105492	102106439
A01	103277037	103279316		A02	19479866	19483210		A02	11709192	11709652		A01	110158157	110162558		A01	102126176	102126888
A01	103355920	103357265		A02	19901738	19904266		A02	11728408	11729586		A01	110180006	110181763		A01	102130316	102133259
A01	103377003	103378813		A02	20077175	20077814		A02	11775765	11776723		A01	110227651	110229778		A01	102139152	102140043
A01	103455423	103457564		A02	20406629	20407252		A02	11871978	11879091		A01	110241696	110242521		A01	102142446	102145824
A01	103458866	103460124		A02	20598482	20599538		A02	11939398	11942241		A01	110252917	110256845		A01	102196680	102198994
A01	103550990	103555663		A02	20821547	20824925		A02	12035773	12037814		A01	110266767	110268303		A01	102210959	102213125
A01	103559095	103561546		A02	20890762	20898164		A02	12125175	12127986		A01	110270439	110271327		A01	102216319	102216938
A01	103670664	103671656		A02	21332423	21334038		A02	12171067	12177337		A01	110278987	110279566		A01	102220894	102221679
A01	103674592	103681655		A02	21366892	21367709		A02	12182603	12186231		A01	110290376	110291389		A01	102231143	102235342
A01	103702175	103705146		A02	21935435	21937795		A02	13059349	13071533		A01	110305804	110306742		A01	102239592	102241574
A01	103709018	103712466		A02	22262396	22263059		A02	13079070	13080656		A01	110358569	110360052		A01	102245252	102246463
A01	103747069	103749968		A02	22847375	22848131		A02	13111581	13125380		A01	110364216	110365201		A01	102266221	102267934
A01	103836588	103839553		A02	22999428	23000192		A02	13212962	13215788		A01	110384229	110385133		A01	102289352	102290131
A01	103863781	103864447		A02	23856780	23857414		A02	13282260	13287646		A01	110386573	110387374		A01	102347406	102348103
A01	103871173	103872407		A02	23996381	23997095		A02	13712351	13716622		A01	110399647	110403530		A01	102452032	102453874
A01	103916311	103917468		A02	24059452	24060115		A02	13755444	13757784		A01	110404499	110405915		A01	102536825	102537380
A01	103931887	103932236		A02	24200771	24204067		A02	13758905	13764016		A01	110407695	110408065		A01	102548381	102549430
A01	103952894	103953425		A02	24382262	24383415		A02	13874863	13877610		A01	110499723	110503422		A01	102553139	102554047
A01	103967491	103968586		A02	24421206	24421987		A02	13886307	13889892		A01	110507159	110507911		A01	102593826	102594404
A01	103981491	103982583		A02	24647840	24648792		A02	13992496	13995161		A01	110508823	110512690		A01	102605442	102607462
A01	103986815	103987873		A02	24829620	24830125		A02	13998311	13999686		A01	110517185	110522578		A01	102608971	102613691
A01	103989129	103991424		A02	24927143	24927979		A02	14250475	14257495		A01	110543797	110544327		A01	102634909	102636713
A01	104087191	104091860		A02	25000962	25001586		A02	14489669	14490508		A01	110578321	110579543		A01	102670004	102671164
A01	104114207	104115171		A02	25434259	25434983		A02	14624136	14626934		A01	110587791	110588754		A01	102680375	102681402
A01	104131144	104133492		A02	26032546	26033391		A02	14653310	14656479		A01	110602730	110603406		A01	102684272	102685836
A01	104157852	104159595		A02	26049521	26050820		A02	14921281	14922840		A01	110625928	110627559		A01	102691999	102692785
A01	104166486	104167130		A02	26116204	26116732		A02	14944847	14947415		A01	110661358	110662071		A01	102754526	102755350
A01	104265043	104270347		A02	26139049	26139744		A02	14972941	14974976		A01	110764745	110766814		A01	102779700	102782038
A01	104275275	104276315		A02	26195072	26195785		A02	14995611	14996165		A01	110768769	110769683		A01	102787692	102790100
A01	104277411	104279373		A02	26215412	26216108		A02	15002059	15003349		A01	110773622	110775900		A01	102857636	102858785
A01	104394798	104395971		A02	26499922	26500536		A02	15022970	15028983		A01	110780840	110781563		A01	102874642	102876919
A01	104505978	104509798		A02	27080541	27081419		A02	15164822	15168396		A01	110803343	110804201		A01	103007350	103008233
A01	104511991	104517916		A02	27836232	27837122		A02	15170041	15171856		A01	110838167	110840866		A01	103052826	103058493
A01	104521601	104523908		A02	28234604	28235488		A02	15216919	15221614		A01	110851537	110855013		A01	103060051	103064605
A01	104530135	104535483		A02	28724121	28725027		A02	15283780	15284318		A01	110858758	110859752		A01	103125494	103126377
A01	104620365	104624680		A02	28918715	28920309		A02	15380707	15385468		A01	110870552	110871328		A01	103137492	103139125
A01	104656954	104657575		A02	29400385	29409219		A02	15670575	15674515		A01	110938701	110939354		A01	103140256	103143351
A01	104704089	104704651		A02	30091315	30092222		A02	15982567	15984967		A01	110944419	110946655		A01	103226265	103231807
A01	104731213	104732182		A02	30138088	30141016		A02	16564239	16565854		A01	110948179	110950447		A01	103276390	103279276
A01	104771104	104772261		A02	30147106	30147884		A02	16817241	16819672		A01	110975543	110976249		A01	103287955	103288979
A01	104778265	104781498		A02	30160275	30161486		A02	16986781	16989231		A01	110981076	110981933		A01	103377038	103378813
A01	104783573	104785848		A02	30835255	30836132		A02	16993518	16995782		A01	111035321	111036640		A01	103456605	103457568
A01	104885767	104889814		A02	31635386	31635964		A02	17308501	17310045		A01	111055344	111056311		A01	103491018	103492020
A01	104901372	104902369		A02	31770195	31772012		A02	17349266	17355767		A01	111057349	111058204		A01	103545488	103546224
A01	104910667	104913558		A02	32217196	32217797		A02	17367930	17369675		A01	111124628	111126434		A01	103554498	103555646
A01	104916788	104917361		A02	32687738	32688489		A02	17864585	17866239		A01	111142837	111145585		A01	103558958	103561258
A01	104934764	104936029		A02	32704970	32705732		A02	18072064	18078894		A01	111154955	111155757		A01	103674643	103675694
A01	105141206	105146282		A02	33013376	33019820		A02	18242208	18243123		A01	111164163	111170215		A01	103696150	103696824
A01	105148149	105149979		A02	33131988	33133065		A02	18303070	18306693		A01	111179483	111180008		A01	103703990	103705159
A01	105156444	105159081		A02	33419091	33420019		A02	18482789	18512573		A01	111212030	111214027		A01	103709865	103712429
A01	105205216	105206722		A02	33686630	33687402		A02	18519433	18523567		A01	111217566	111218440		A01	103747090	103750194
A01	105225953	105227383		A02	33963696	33964500		A02	18534804	18537492		A01	111248209	111248896		A01	103758790	103759842
A01	105230645	105232195		A02	33997826	33998621		A02	18712692	18716504		A01	111257182	111257574		A01	103770185	103771131
A01	105234195	105236658		A02	34704039	34710870		A02	19193760	19195630		A01	111259117	111262661		A01	103836578	103837672
A01	105297155	105299478		A02	34866884	34867550		A02	19196511	19198978		A01	111274411	111278261		A01	103863787	103864444
A01	105322436	105325629		A02	34959429	34960237		A02	19720979	19722280		A01	111279645	111280329		A01	103870433	103873850
A01	105337628	105338827		A02	34975552	34976587		A02	19726724	19729249		A01	111281834	111282712		A01	103952951	103953831
A01	105346483	105357896		A02	35864839	35865407		A02	20022143	20024826		A01	111284009	111284535		A01	103956664	103957590
A01	105363696	105365047		A02	35884353	35886004		A02	20075358	20077804		A01	111296527	111297092		A01	103963187	103963656
A01	105412773	105413491		A02	35984582	35985461		A02	20406571	20410000		A01	111302235	111304126		A01	103967493	103968450
A01	105455837	105456639		A02	36617130	36618147		A02	20596128	20599623		A01	111341451	111342661		A01	103981292	103982592
A01	105462605	105463289		A02	36817095	36818046		A02	20616577	20617945		A01	111400242	111402228		A01	103986450	103987874
A01	105491593	105492158		A02	38650117	38650915		A02	20823563	20824743		A01	111412634	111413368		A01	103989128	103990397
A01	105496434	105498939		A02	39096312	39096979		A02	21332244	21334081		A01	111421693	111422919		A01	104114184	104115116
A01	105511745	105512567		A02	40246678	40249946		A02	21363486	21367777		A01	111426668	111427912		A01	104131162	104133622
A01	105550066	105551018		A02	40402591	40403186		A02	22259443	22263113		A01	111446350	111446893		A01	104166488	104167133
A01	105552171	105552893		A02	40677534	40678252		A02	22744755	22748617		A01	111457923	111459543		A01	104265103	104266227
A01	105563228	105563998		A02	41055216	41074257		A02	22969253	22974239		A01	111526405	111528128		A01	104275399	104278378
A01	105566295	105568850		A02	41183732	41189837		A02	22999334	23002469		A01	111531822	111532686		A01	104394449	104396050
A01	105593330	105594633		A02	41438964	41439914		A02	23851873	23857435		A01	111535108	111539232		A01	104512009	104513411
A01	105604533	105606952		A02	41543383	41543997		A02	23994302	23997118		A01	111567787	111569211		A01	104515612	104518064
A01	105627555	105629745		A02	41551766	41552559		A02	24051247	24060097		A01	111593872	111597284		A01	104522684	104523725
A01	105646865	105648725		A02	42055727	42056608		A02	24159599	24161541		A01	111648044	111650361		A01	104530125	104536033
A01	105652436	105653054		A02	42683045	42696521		A02	24382115	24388133		A01	111652436	111653798		A01	104604599	104606416
A01	105717344	105718047		A02	42754837	42757031		A02	24416030	24422037		A01	111665642	111666755		A01	104621556	104624888
A01	105801763	105803524		A02	42830066	42830873		A02	24647805	24648793		A01	111684594	111687815		A01	104626462	104630245
A01	105808216	105809873		A02	42836850	42837744		A02	24829573	24831415		A01	111698003	111700082		A01	104656989	104657607
A01	105812357	105813683		A02	42863784	42864383		A02	24927047	24928672		A02	17591	22919		A01	104668865	104669410
A01	105849596	105852752		A02	42957243	42957762		A02	24960221	24981709		A02	56321	57402		A01	104704079	104704661
A01	105854686	105856538		A02	43076441	43081662		A02	24990188	25001628		A02	59483	63687		A01	104731207	104731999
A01	105861713	105862732		A02	43082912	43085995		A02	25434202	25436691		A02	66976	71227		A01	104736929	104737744
A01	105865520	105870078		A02	43200478	43208285		A02	26049515	26051901		A02	74196	78905		A01	104744785	104745463
A01	105872551	105874791		A02	43292628	43293399		A02	26116044	26116750		A02	83677	88286		A01	104761122	104762290
A01	105876853	105877203		A02	43343438	43344112		A02	26131180	26139898		A02	97461	99795		A01	104771104	104773996
A01	105944550	105946081		A02	43372830	43386214		A02	26181511	26186309		A02	101887	103142		A01	104778288	104779169
A01	105997887	105998866		A02	43760155	43761153		A02	26189035	26195902		A02	118862	123130		A01	104783339	104784894
A01	106009811	106017666		A02	44008249	44009239		A02	26215373	26219478		A02	136014	139496		A01	104885805	104887045
A01	106050353	106060087		A02	44406839	44407947		A02	26461478	26465257		A02	140640	143360		A01	104888132	104889752
A01	106076830	106077872		A02	44599440	44600773		A02	26499933	26501918		A02	144253	144716		A01	104901010	104902377
A01	106081640	106083042		A02	44671413	44672457		A02	26879099	26882776		A02	145946	146672		A01	104934975	104936028
A01	106101847	106103154		A02	44689970	44698628		A02	27080475	27086776		A02	147760	150660		A01	105141676	105146255
A01	106116742	106117771		A02	44785446	44786332		A02	27797951	27803152		A02	152048	154893		A01	105148081	105150006
A01	106131151	106131682		A02	44917665	44919575		A02	27829882	27837065		A02	157544	158920		A01	105156469	105158373
A01	106139200	106140363		A02	45257421	45258087		A02	28218971	28222150		A02	166569	169172		A01	105205149	105207056
A01	106315198	106319974		A02	45311341	45312015		A02	28234360	28235545		A02	183029	184090		A01	105208120	105211517
A01	106468711	106469250		A02	45426889	45427610		A02	28432958	28433894		A02	191568	192686		A01	105226052	105227487
A01	106480600	106485501		A02	45445814	45447790		A02	28724052	28726141		A02	198566	201457		A01	105229869	105236633
A01	106487460	106488862		A02	45487454	45492567		A02	28916364	28920417		A02	217826	219044		A01	105298196	105299499
A01	106504974	106506231		A02	45611706	45612610		A02	30091238	30094739		A02	232167	233152		A01	105322521	105323615
A01	106509394	106509939		A02	45691270	45692340		A02	30147028	30149261		A02	245278	246526		A01	105337616	105338715
A01	106536850	106537623		A02	45695904	45697340		A02	30160187	30161482		A02	253894	255185		A01	105349673	105351777
A01	106563204	106565638		A02	46289492	46290585		A02	30831645	30836185		A02	258935	263553		A01	105363696	105364723
A01	106591031	106592493		A02	46296459	46299298		A02	31191712	31193552		A02	277556	279895		A01	105412712	105413539
A01	106607115	106609535		A02	46417532	46425407		A02	31400785	31406449		A02	310533	312035		A01	105455833	105456602
A01	106666348	106669564		A02	46526291	46536748		A02	31635356	31637171		A02	315596	319220		A01	105462606	105463289
A01	106681853	106682896		A02	46564519	46570595		A02	31740287	31741541		A02	321957	322992		A01	105491552	105492205
A01	106685735	106687228		A02	46601321	46606862		A02	32214086	32217856		A02	326239	327501		A01	105496415	105498980
A01	106691776	106694626		A02	46609104	46617867		A02	32481434	32483691		A02	358864	361701		A01	105511702	105512576
A01	106696686	106698873		A02	46830747	46831446		A02	32687681	32692052		A02	366057	367214		A01	105563229	105564004
A01	106778580	106780453		A02	46840376	46842437		A02	32701612	32705780		A02	382743	383476		A01	105570108	105570854
A01	106806102	106807963		A02	46880348	46882506		A02	33124668	33133131		A02	422884	423890		A01	105604532	105606953
A01	106851470	106853251		A02	46938926	46941028		A02	33414959	33420081		A02	460097	461437		A01	105627578	105628580
A01	106866409	106868528		A02	47355142	47355878		A02	33686586	33702072		A02	471767	472852		A01	105652350	105653092
A01	106890358	106890812		A02	47417770	47418632		A02	33737073	33741028		A02	477906	478854		A01	105717294	105718094
A01	106897333	106897744		A02	47429198	47429878		A02	33963584	33974789		A02	483338	485479		A01	105801841	105803925
A01	106907143	106907918		A02	47443710	47444548		A02	33996543	33998629		A02	488299	490520		A01	105808903	105809948
A01	106960822	106961660		A02	47494858	47496371		A02	34866816	34871357		A02	515302	516302		A01	105813066	105813540
A01	107017181	107018551		A02	47565506	47566186		A02	34922361	34960324		A02	518685	522248		A01	105821074	105821527
A01	107036831	107038362		A02	47680597	47685431		A02	34971485	34976627		A02	542753	543461		A01	105849599	105852603
A01	107109029	107112166		A02	47787279	47799989		A02	35159170	35164354		A02	551882	552365		A01	105854746	105856559
A01	107116904	107120627		A02	47813750	47814416		A02	35244126	35247444		A02	558796	560097		A01	105861823	105862767
A01	107149554	107151687		A02	48400593	48401405		A02	35864812	35865490		A02	571180	575800		A01	105865261	105867678
A01	107172202	107173988		A02	48405020	48405555		A02	35876740	35877849		A02	586701	587361		A01	105871938	105874800
A01	107198558	107200568		A02	48415321	48421339		A02	36707505	36709266		A02	601032	602143		A01	105876813	105877291
A01	107202084	107203430		A02	48427362	48429736		A02	36813946	36818122		A02	603702	604623		A01	105997918	105998906
A01	107204951	107211062		A02	48432940	48433709		A02	37634226	37646124		A02	633374	635119		A01	106010196	106015260
A01	107226140	107229670		A02	48447048	48450931		A02	38645396	38650916		A02	639663	640517		A01	106050368	106052159
A01	107243618	107246524		A02	48490707	48491245		A02	38652368	38654874		A02	646243	647137		A01	106076835	106077869
A01	107276038	107276493		A02	48714838	48715681		A02	38735431	38739678		A02	651488	652150		A01	106082454	106083057
A01	107357388	107358017		A02	49410350	49411043		A02	39096249	39097069		A02	656190	656785		A01	106101824	106108562
A01	107364743	107366424		A02	50256312	50257205		A02	40246663	40249942		A02	660991	663409		A01	106116788	106117770
A01	107371077	107374700		A02	53297548	53298217		A02	40339616	40351438		A02	666063	668070		A01	106131113	106131709
A01	107391185	107391821		A02	53791656	53792423		A02	40402532	40403566		A02	690188	690888		A01	106139217	106140487
A01	107396624	107399268		A02	54208987	54215027		A02	40663850	40665216		A02	696904	698910		A01	106250714	106252140
A01	107416693	107417415		A02	54818377	54819308		A02	40670145	40678285		A02	854512	855527		A01	106424187	106424635
A01	107448973	107449609		A02	55278719	55279731		A02	40847706	40850786		A02	863635	865442		A01	106468650	106469301
A01	107455945	107458788		A02	55874194	55877065		A02	41383909	41386069		A02	876755	877273		A01	106472968	106473541
A01	107480533	107481552		A02	56034962	56042261		A02	41543338	41546396		A02	879689	880706		A01	106483381	106485477
A01	107489995	107492939		A02	56524305	56525134		A02	41549581	41552604		A02	887105	887831		A01	106487881	106488850
A01	107634701	107635481		A02	56535252	56536267		A02	42050981	42052967		A02	895482	896744		A01	106505092	106505838
A01	107705050	107705774		A02	56580444	56581297		A02	42055696	42056702		A02	905102	908365		A01	106536839	106537582
A01	107734699	107737549		A02	56649913	56650787		A02	42099979	42101569		A02	909274	910002		A01	106584040	106584855
A01	107742802	107745699		A02	56764461	56765580		A02	42234601	42236264		A02	911037	914490		A01	106591039	106592473
A01	107773920	107775758		A02	56959646	56966519		A02	42352390	42355585		A02	927225	928299		A01	106607318	106609535
A01	107817624	107821262		A02	58491140	58491984		A02	42704415	42704950		A02	969205	971109		A01	106646946	106647638
A01	107823403	107825520		A02	58498608	58500763		A02	42825276	42827598		A02	991434	992229		A01	106685723	106687272
A01	107833748	107835410		A02	58507190	58510715		A02	42830010	42832925		A02	999353	999881		A01	106693524	106694641
A01	107863737	107864455		A02	59659269	59664319		A02	42836682	42839662		A02	1009420	1009887		A01	106779606	106780410
A01	107875037	107875871		A02	60054661	60055597		A02	42842405	42843088		A02	1028989	1030084		A01	106804663	106807844
A01	107882416	107883898		A02	60987892	60989355		A02	42844741	42846292		A02	1046378	1047511		A01	106845475	106849842
A01	107906353	107910827		A02	61008519	61009172		A02	42862271	42864533		A02	1056018	1059653		A01	106851887	106853168
A01	107914756	107916373		A02	61172730	61173386		A02	42947327	42957858		A02	1073899	1074451		A01	106907172	106907879
A01	107929746	107930997		A02	62318474	62319291		A02	43049649	43053052		A02	1076586	1077311		A01	106939858	106941054
A01	107934055	107934878		A02	63041193	63041953		A02	43080148	43080855		A02	1085647	1087183		A01	106944749	106945561
A01	107960976	107963445		A02	63163440	63164404		A02	43205692	43206932		A02	1090782	1092361		A01	106960796	106961659
A01	108140304	108140885		A02	63696197	63696781		A02	43343443	43344155		A02	1094289	1096903		A01	106979074	106982196
A01	108145108	108146831		A02	64674323	64688192		A02	43346548	43348878		A02	1115060	1116158		A01	107017206	107018549
A01	108190378	108191063		A02	68214181	68215312		A02	43352158	43352838		A02	1120675	1121327		A01	107022965	107023691
A01	108447465	108448620		A02	68620118	68620984		A02	43354397	43356742		A02	1122671	1124405		A01	107036824	107037688
A01	108456549	108457888		A02	68929495	68930238		A02	43756616	43761210		A02	1137495	1138088		A01	107111237	107112189
A01	108510870	108511764		A02	68934825	68935435		A02	43854932	43857855		A02	1155155	1157065		A01	107116911	107117479
A01	108559803	108561381		A02	68972692	68973431		A02	44007404	44009282		A02	1213470	1214208		A01	107119895	107120633
A01	108575999	108576982		A02	69651306	69655614		A02	44303189	44306623		A02	1217421	1218260		A01	107126586	107127797
A01	108581632	108583323		A02	69974752	69975584		A02	44308645	44309412		A02	1272153	1272884		A01	107128983	107130881
A01	108589358	108590222		A02	70160904	70161771		A02	44346153	44349266		A02	1326205	1327003		A01	107146178	107147255
A01	108611811	108612631		A02	70473620	70479037		A02	44406735	44409956		A02	1376218	1377902		A01	107149539	107152525
A01	108625720	108631351		A02	71471065	71471978		A02	44671406	44674657		A02	1380968	1381900		A01	107154661	107155570
A01	108652228	108654219		A02	72253455	72255681		A02	44785448	44786162		A02	1449718	1450452		A01	107172206	107174229
A01	108656604	108663457		A02	72317458	72318177		A02	45099164	45100866		A02	1483267	1484022		A01	107198559	107199625
A01	108674774	108676408		A02	73354301	73355223		A02	45176951	45177980		A02	1511842	1512983		A01	107201040	107203044
A01	108719188	108719821		A02	73840048	73841041		A02	45257336	45260543		A02	1518965	1520108		A01	107204954	107205811
A01	108759112	108760925		A02	75174216	75174993		A02	45497907	45500732		A02	1523897	1525889		A01	107228349	107229671
A01	108762426	108764188		A02	75288558	75289278		A02	45610840	45612620		A02	1535397	1536374		A01	107243618	107244481
A01	108779079	108781119		A02	75355502	75356484		A02	45691218	45693821		A02	1545931	1547223		A01	107312724	107313580
A01	108799721	108801589		A02	75895464	75896388		A02	46093280	46093990		A02	1564001	1565031		A01	107323786	107324968
A01	108808635	108809330		A02	76604283	76605162		A02	46288136	46290594		A02	1575757	1576611		A01	107357222	107358130
A01	108813514	108816590		A02	76643428	76644744		A02	46296930	46299225		A02	1593575	1594744		A01	107364313	107374640
A01	108830255	108831228		A02	76646147	76647064		A02	46830710	46831791		A02	1745602	1746402		A01	107391240	107391848
A01	108843406	108844363		A02	77090267	77093848		A02	47355139	47358888		A02	1747531	1748952		A01	107446710	107449624
A01	108847692	108851541		A02	77258974	77259717		A02	47417729	47421203		A02	1760746	1761901		A01	107455186	107458819
A01	108866378	108866983		A02	77521630	77523396		A02	47422786	47426774		A02	1764026	1765647		A01	107478119	107478959
A01	108873008	108874576		A02	77526693	77527475		A02	47429184	47432528		A02	1783150	1785362		A01	107479925	107481533
A01	108876347	108877532		A02	77611252	77611951		A02	47441882	47444454		A02	1872972	1873705		A01	107482785	107483422
A01	108907339	108908386		A02	77633873	77638543		A02	47449020	47452750		A02	1900912	1906139		A01	107487332	107487982
A01	108915675	108920240		A02	77687639	77688305		A02	47494861	47496352		A02	1957572	1958750		A01	107492104	107492946
A01	109043424	109044029		A02	77833803	77838476		A02	47565520	47566354		A02	2003190	2003987		A01	107526660	107527957
A01	109114508	109116058		A02	78436646	78437551		A02	47813701	47814447		A02	2081950	2082702		A01	107531400	107532415
A01	109135474	109135933		A02	78737322	78738206		A02	48400572	48414432		A02	2106742	2108035		A01	107534666	107535935
A01	109139262	109140542		A02	79025213	79026646		A02	48424664	48428241		A02	2119182	2119678		A01	107704994	107705800
A01	109142764	109145077		A02	79076502	79083974		A02	48429157	48438557		A02	2132764	2133610		A01	107734703	107737563
A01	109212177	109213716		A02	79380432	79385553		A02	48488349	48491283		A02	2191530	2194829		A01	107742823	107745748
A01	109268808	109271321		A02	79503722	79504558		A02	48714807	48721948		A02	2200629	2201934		A01	107771097	107775756
A01	109276143	109277086		A02	79743844	79748422		A02	49410266	49412601		A02	2216012	2218050		A01	107820287	107821251
A01	109297463	109299185		A02	79928768	79929453		A02	50246544	50257253		A02	2219295	2221791		A01	107824362	107825544
A01	109304862	109305556		A02	80349393	80350086		A02	50962454	50966120		A02	2242099	2243750		A01	107863718	107864559
A01	109308666	109309345		A02	80573229	80575048		A02	53291637	53298290		A02	2249049	2249841		A01	107875135	107875808
A01	109397502	109398397		A02	80616760	80617420		A02	53791652	53793768		A02	2272459	2273496		A01	107914756	107916034
A01	109417094	109419841		A02	80875153	80876039		A02	54591605	54594425		A02	2306845	2308335		A01	107929260	107930997
A01	109422063	109422533		A02	81025447	81031985		A02	54603924	54604871		A02	2446089	2447490		A01	107934054	107935671
A01	109426989	109428366		A02	81061200	81062202		A02	54818373	54821939		A02	2468045	2468578		A01	107960126	107963429
A01	109435326	109436448		A02	81096344	81097193		A02	55224598	55226956		A02	2473917	2476741		A01	108145112	108146791
A01	109467122	109467673		A02	81921854	81922492		A02	55278762	55279721		A02	2520064	2520966		A01	108190376	108191064
A01	109469272	109471007		A02	81962693	81963398		A02	56262824	56263482		A02	2526906	2528061		A01	108447547	108448652
A01	109560361	109563967		A02	82225283	82228859		A02	56516443	56517710		A02	2534620	2535054		A01	108456272	108457897
A01	109570524	109571955		A02	82279559	82282018		A02	56524298	56530354		A02	2543385	2543887		A01	108559812	108562088
A01	109591752	109594196		A02	82392168	82393049		A02	56534940	56536359		A02	2553952	2554957		A01	108578772	108579752
A01	109604173	109606655		A02	82491496	82492238		A02	56572140	56578858		A02	2563690	2564427		A01	108581371	108583435
A01	109679586	109683454		A02	82556639	82557297		A02	56580453	56583958		A02	2596461	2598101		A01	108652228	108652932
A01	109689304	109690137		A02	82607057	82608190		A02	56630769	56650836		A02	2725773	2728385		A01	108661935	108663483
A01	109703306	109705575		A02	82883458	82884102		A02	56764447	56769354		A02	2915226	2916481		A01	108719091	108719846
A01	109707685	109709607		A02	82908715	82909220		A02	58491122	58495767		A02	2995632	2996242		A01	108762897	108764157
A01	109715817	109716697		A02	83247911	83248642		A02	58497856	58500938		A02	3065612	3066533		A01	108766166	108768853
A01	109718977	109719595		A02	83279056	83279883		A02	59202746	59205353		A02	3072375	3074292		A01	108779035	108781111
A01	109731011	109733309		A02	83307256	83307994		A02	60052689	60055657		A02	3087623	3088884		A01	108799731	108800585
A01	109748729	109750958		A02	83322653	83329013		A02	61008451	61010915		A02	3139068	3141006		A01	108808655	108809722
A01	109769614	109770127		A02	83948162	83950789		A02	61172693	61177031		A02	3174214	3175147		A01	108813517	108814233
A01	109857646	109859892		A02	84222066	84223101		A02	61867064	61867686		A02	3177612	3178189		A01	108830220	108831258
A01	109862478	109863667		A02	84279663	84280164		A02	62311004	62319376		A02	3180904	3182513		A01	108843379	108844940
A01	109880758	109883332		A02	84360886	84366435		A02	63039808	63042009		A02	3188403	3194045		A01	108850207	108851513
A01	109888770	109889650		A02	84473378	84474054		A02	63158603	63164457		A02	3198440	3199925		A01	108873015	108874905
A01	109902643	109903318		A02	84504463	84505532		A02	63657752	63664775		A02	3208736	3210001		A01	108876683	108877517
A01	109920253	109921224		A02	85623033	85623726		A02	63693793	63696817		A02	3219035	3221376		A01	108878881	108879742
A01	109928524	109931876		A02	86154956	86155971		A02	65307342	65327094		A02	3254855	3259479		A01	108893233	108894325
A01	109937795	109939918		A02	86196389	86197182		A02	66170712	66171344		A02	3269657	3272654		A01	108907482	108908424
A01	109976873	109978039		A02	87669295	87671632		A02	68212439	68215373		A02	3283523	3283920		A01	108917587	108919766
A01	109979550	109983226		A02	88578772	88579565		A02	68620060	68644169		A02	3302921	3304540		A01	108928369	108929172
A01	110053193	110053697		A02	88789307	88790191		A02	68927677	68930290		A02	3305926	3306528		A01	109043419	109044034
A01	110057084	110058019		A02	89411385	89411910		A02	68931909	68935561		A02	3316357	3316832		A01	109114588	109115963
A01	110073844	110081403		A02	89575375	89576224		A02	68972604	68979284		A02	3322507	3322950		A01	109135435	109135982
A01	110153782	110155916		A02	89721472	89726958		A02	69136526	69140015		A02	3335093	3335856		A01	109139259	109140187
A01	110158745	110162535		A02	89962192	89963307		A02	69649364	69653909		A02	3338283	3339141		A01	109144123	109145064
A01	110180139	110181734		A02	90168279	90169017		A02	69794691	69796283		A02	3369625	3371227		A01	109169387	109170914
A01	110227598	110229462		A02	90419474	90420539		A02	69886739	69895519		A02	3451717	3453750		A01	109179337	109181074
A01	110266765	110268221		A02	90438548	90439069		A02	69956052	69975620		A02	3458382	3459677		A01	109212131	109213957
A01	110270439	110274184		A02	91123730	91137331		A02	70160878	70166069		A02	3460761	3461762		A01	109268731	109271441
A01	110278967	110279979		A02	92000215	92000759		A02	70475471	70475969		A02	3470858	3472659		A01	109276133	109277343
A01	110286828	110291589		A02	92184503	92188447		A02	70610352	70611018		A02	3508308	3509092		A01	109289730	109290801
A01	110305753	110306730		A02	92241957	92249756		A02	70715135	70716665		A02	3537952	3538733		A01	109297436	109299273
A01	110357887	110360018		A02	92485361	92486568		A02	71214493	71216918		A02	3549224	3550228		A01	109304822	109305617
A01	110382061	110385103		A02	92583156	92584378		A02	71228234	71233118		A02	3558878	3562652		A01	109469252	109470131
A01	110401702	110405954		A02	92614568	92615516		A02	71471010	71472745		A02	3576295	3576979		A01	109477007	109479290
A01	110407650	110409423		A02	92727191	92732803		A02	72317411	72326414		A02	3591475	3592361		A01	109529791	109530658
A01	110429314	110433266		A02	92857775	92859643		A02	73129332	73148981		A02	3601678	3602728		A01	109560299	109563972
A01	110452304	110452987		A02	92880539	92882307		A02	73353286	73355242		A02	3611591	3613523		A01	109566510	109571957
A01	110458584	110460752		A02	92918979	92919902		A02	73498701	73505795		A02	3621028	3622811		A01	109604178	109606000
A01	110484965	110485559		A02	92936610	92937406		A02	73836545	73841197		A02	3624119	3624755		A01	109612794	109613978
A01	110488257	110491914		A02	92952725	92953601		A02	73966508	73968239		A02	3633894	3634311		A01	109622512	109623405
A01	110500131	110503284		A02	93086498	93088066		A02	74809322	74831143		A02	3637175	3646977		A01	109676297	109677404
A01	110505441	110512689		A02	93111000	93111819		A02	75169531	75175034		A02	3664520	3665077		A01	109679502	109680968
A01	110515748	110522538		A02	93154173	93155385		A02	75355462	75370865		A02	3692702	3696113		A01	109689291	109690112
A01	110525777	110531595		A02	93189461	93191458		A02	75895359	75899938		A02	3703826	3705614		A01	109704576	109705610
A01	110543798	110544349		A02	93227493	93228476		A02	76490599	76492539		A02	3706887	3710901		A01	109708912	109709651
A01	110578322	110581926		A02	93385467	93393216		A02	76586323	76589518		A02	3719231	3724385		A01	109715405	109716615
A01	110587669	110588787		A02	93407762	93408859		A02	76601851	76605244		A02	3731936	3736925		A01	109748733	109750317
A01	110602690	110603416		A02	93502274	93502935		A02	76643384	76644915		A02	3739465	3740101		A01	109769613	109770135
A01	110621981	110622617		A02	93546841	93547492		A02	76646134	76650955		A02	3747723	3748835		A01	109780641	109781503
A01	110625971	110627559		A02	93552649	93553372		A02	76870546	76878427		A02	3752258	3752949		A01	109797998	109798894
A01	110642340	110645979		A02	93598132	93599347		A02	77203932	77209760		A02	3793062	3795483		A01	109857535	109859916
A01	110660037	110662075		A02	93831671	93832246		A02	77258839	77266702		A02	3806760	3807771		A01	109880776	109885020
A01	110675489	110675886		A02	93834552	93836732		A02	77526645	77533594		A02	3814050	3815108		A01	109902585	109903332
A01	110764717	110766560		A02	93901604	93902252		A02	77606600	77611932		A02	3827761	3828114		A01	109907461	109909220
A01	110768764	110771817		A02	93940329	93941157		A02	77686228	77688351		A02	3858410	3859032		A01	109922300	109925088
A01	110810146	110810682		A02	94002042	94002720		A02	77781347	77782355		A02	3876969	3878383		A01	109928163	109931932
A01	110838121	110840180		A02	94069417	94071142		A02	77986102	77987735		A02	3879560	3885418		A01	109934556	109935497
A01	110870456	110871312		A02	94074329	94075314		A02	78153193	78154010		A02	3887585	3887931		A01	109938667	109939968
A01	110938645	110939415		A02	94084956	94096438		A02	78367325	78378911		A02	3918871	3919707		A01	109945445	109946346
A01	110944327	110946672		A02	94122668	94123449		A02	78432788	78437563		A02	3946699	3949624		A01	109969418	109971915
A01	110957836	110961058		A02	94190518	94191680		A02	78733535	78738333		A02	3957741	3958584		A01	109976991	109978080
A01	110979307	110981996		A02	94195834	94203657		A02	78962171	78963829		A02	4011138	4015792		A01	109982309	109983189
A01	110985878	110986485		A02	94319153	94321617		A02	78965121	78967611		A02	4072960	4074194		A01	110016253	110018263
A01	111009527	111010188		A02	94343054	94344136		A02	79058439	79059033		A02	4079660	4083504		A01	110074018	110076758
A01	111033163	111036694		A02	94345818	94354585		A02	79503406	79504640		A02	4085148	4087165		A01	110109209	110115475
A01	111045256	111046199		A02	94391036	94392896		A02	79571539	79574034		A02	4089076	4090244		A01	110142795	110146051
A01	111055030	111058531		A02	94505237	94505876		A02	79928734	79935288		A02	4093033	4093559		A01	110151584	110151904
A01	111125447	111129035		A02	94509681	94510167		A02	80345998	80350161		A02	4124049	4125664		A01	110153819	110155916
A01	111157613	111158952		A02	94621299	94623708		A02	80573704	80574691		A02	4178503	4180354		A01	110158149	110162576
A01	111163606	111170194		A02	94625640	94626703		A02	80611169	80617520		A02	4193772	4194906		A01	110179971	110181671
A01	111193470	111195424		A02	94664969	94665945		A02	80705480	80707280		A02	4321416	4321945		A01	110192415	110193316
A01	111212044	111214519		A02	94675281	94681938		A02	80709428	80711431		A02	4338292	4338694		A01	110208682	110211716
A01	111216420	111218426		A02	94698220	94709797		A02	80875152	80878880		A02	4423926	4424491		A01	110227543	110229496
A01	111248161	111248932		A02	94753384	94755275		A02	81058725	81062232		A02	4454947	4455377		A01	110241812	110242557
A01	111259123	111262497		A02	94778027	94778677		A02	81096337	81101683		A02	4478459	4486021		A01	110252871	110256245
A01	111281794	111282710		A02	94802345	94802945		A02	81821776	81826435		A02	4527067	4530031		A01	110266766	110267574
A01	111296248	111297092		A02	94834757	94835623		A02	81921742	81928714		A02	4531214	4531622		A01	110270440	110271386
A01	111392151	111394012		A02	94911017	94914321		A02	81962204	81963429		A02	4534790	4539382		A01	110279014	110279712
A01	111398578	111401269		A02	94963353	94981451		A02	82183131	82187332		A02	4541928	4545035		A01	110290410	110291232
A01	111417610	111422858		A02	95009056	95012237		A02	82285146	82287986		A02	4545918	4548830		A01	110301399	110302201
A01	111424462	111427919		A02	95040175	95040817		A02	82392098	82395310		A02	4572732	4573908		A01	110305754	110306770
A01	111446288	111449428		A02	95090714	95091484		A02	82491459	82494035		A02	4605750	4608685		A01	110357707	110360033
A01	111458350	111459569		A02	95118589	95119329		A02	82513203	82523690		A02	4671596	4672162		A01	110364250	110365224
A01	111492896	111493889		A02	95661803	95662705		A02	82607028	82614077		A02	4713211	4714337		A01	110366591	110367648
A01	111524963	111528140		A02	96147229	96148327		A02	82883441	82900876		A02	4753920	4754857		A01	110384216	110385130
A01	111531780	111535614		A02	96251140	96251884		A02	82924412	82925470		A02	4767217	4767889		A01	110386523	110387471
A01	111536710	111538859		A02	96340955	96341754		A02	83244692	83248740		A02	4819699	4820796		A01	110399681	110400318
A01	111542072	111543435		A02	96419256	96420299		A02	83279024	83285921		A02	4840116	4841410		A01	110401639	110403485
A01	111567848	111572848		A02	96444649	96447549		A02	83307211	83310227		A02	4844259	4847393		A01	110405016	110405953
A01	111593933	111594429		A02	96454045	96455066		A02	84222022	84224680		A02	4866059	4867286		A01	110407512	110408064
A01	111644371	111649038		A02	96470495	96471232		A02	84279618	84281453		A02	4869662	4870341		A01	110428770	110433318
A01	111650076	111653841		A02	96551428	96552023		A02	84282406	84286328		A02	4874363	4875201		A01	110458986	110460749
A01	111665630	111670162		A02	96617586	96618256		A02	84363362	84364747		A02	4899540	4900849		A01	110479630	110481050
A01	111683280	111685104		A02	96682346	96683117		A02	84496783	84499448		A02	4937352	4938027		A01	110484965	110485534
A01	111686688	111691702		A02	96722606	96725312		A02	85619720	85623786		A02	4952148	4953698		A01	110499904	110503409
A01	111697964	111700150		A02	96728389	96729520		A02	86154878	86158271		A02	5002360	5004924		A01	110507124	110512695
A02	41161	46268		A02	96767690	96778405		A02	86187899	86197210		A02	5027443	5029616		A01	110515885	110522538
A02	51309	53161		A02	96788070	96789697		A02	88578709	88587887		A02	5058128	5058617		A01	110530442	110531613
A02	56315	67965		A02	97081362	97081992		A02	88789302	88792850		A02	5095617	5096605		A01	110578320	110579730
A02	69047	80897		A02	97181068	97183694		A02	89223767	89227291		A02	5189701	5190498		A01	110587760	110588764
A02	83678	90765		A02	97361258	97361883		A02	89401056	89410218		A02	5275732	5276047		A01	110602721	110603431
A02	92403	96081		A02	97455746	97461209		A02	89411437	89411944		A02	5280599	5282219		A01	110604902	110605903
A02	97457	103163		A02	97499509	97529655		A02	89534118	89538635		A02	5287213	5287678		A01	110619752	110620793
A02	118829	123175		A02	97718618	97719187		A02	89559416	89559978		A02	5291041	5292305		A01	110625964	110627567
A02	136012	139494		A02	97893988	97894960		A02	89573920	89576372		A02	5293785	5296764		A01	110660971	110662077
A02	140620	142908		A02	97915703	97927955		A02	89957083	89963304		A02	5313943	5314315		A01	110675486	110675926
A02	144596	146687		A02	97954193	97963741		A02	90056407	90059389		A02	5315640	5316894		A01	110737283	110737850
A02	148052	150676		A02	98214048	98214662		A02	90149415	90150621		A02	5323758	5324508		A01	110764733	110766657
A02	152047	154867		A02	98282013	98288610		A02	90419488	90423217		A02	5337931	5338756		A01	110768769	110769738
A02	157941	158999		A02	98370780	98371407		A02	90438575	90439062		A02	5351369	5352675		A01	110773600	110775781
A02	167175	173692		A02	98377436	98378082		A02	90880205	90881191		A02	5356101	5357145		A01	110780792	110781574
A02	182994	185429		A02	98432007	98432693		A02	91922945	91928256		A02	5373518	5375318		A01	110803332	110804272
A02	190624	192684		A02	98577361	98577886		A02	91967783	91972321		A02	5385977	5388125		A01	110826321	110828985
A02	198576	201232		A02	98631887	98634457		A02	92006307	92009162		A02	5397637	5398286		A01	110838103	110840884
A02	217813	219052		A02	98662380	98663190		A02	92016567	92019665		A02	5399386	5401444		A01	110851658	110855019
A02	221055	221817		A02	98676724	98684744		A02	92464176	92465369		A02	5446307	5449016		A01	110858711	110859627
A02	223100	223990		A02	98707511	98713149		A02	92485346	92486293		A02	5454508	5457019		A01	110870412	110871327
A02	228604	233109		A02	98741777	98752112		A02	92614506	92618149		A02	5472102	5473297		A01	110938670	110939354
A02	253958	264984		A02	98757294	98757882		A02	92918965	92924974		A02	5582533	5583593		A01	110944404	110946654
A02	270968	272090		A02	98763064	98763720		A02	92926454	92937472		A02	5896908	5897779		A01	110948156	110955383
A02	277567	279847		A02	98773507	98781943		A02	92952648	92954738		A02	5900772	5902164		A01	110975538	110976247
A02	291966	293498		A02	98788513	98789311		A02	93041021	93044240		A02	5924634	5926154		A01	110981102	110981947
A02	311027	312125		A02	98801568	98802530		A02	93110869	93114185		A02	5996354	5997071		A01	110987871	110988817
A02	314928	319022		A02	98883617	98893079		A02	93154178	93155254		A02	6007257	6009069		A01	110997193	110998682
A02	320958	322999		A02	98934903	98935336		A02	93191019	93191391		A02	6017648	6018099		A01	111009514	111010157
A02	326224	327558		A02	98968776	98972692		A02	93227041	93228542		A02	6019075	6019913		A01	111035253	111036640
A02	333041	333814		A02	98977529	98978525		A02	93297037	93298607		A02	6070227	6072846		A01	111055236	111056311
A02	358816	360761		A02	99099904	99100436		A02	93407591	93409732		A02	6074053	6076612		A01	111057318	111058240
A02	423274	423931		A02	99174350	99175027		A02	93502251	93502936		A02	6111288	6111881		A01	111063303	111064059
A02	451900	453769		A02	99182926	99183741		A02	93540102	93544564		A02	6180152	6181015		A01	111124686	111126485
A02	457784	461461		A02	99209818	99218302		A02	93546837	93550801		A02	6192255	6194935		A01	111138144	111139058
A02	471707	475495		A02	99255176	99256110		A02	93552769	93556452		A02	6200103	6200968		A01	111142782	111145395
A02	488280	490484		A02	99384761	99385597		A02	93598086	93599490		A02	6227274	6228113		A01	111155005	111155747
A02	504561	506024		A02	99393708	99394462		A02	93684944	93685766		A02	6283501	6284218		A01	111164173	111170249
A02	514238	516308		A02	99422220	99422832		A02	93784259	93799069		A02	6384720	6386975		A01	111179405	111180011
A02	518708	522285		A02	99452891	99453502		A02	93829101	93832297		A02	6427165	6428949		A01	111193483	111195148
A02	537852	540536		A02	99596750	99599694		A02	93886097	93887302		A02	6568190	6569002		A01	111203941	111205640
A02	557680	560113		A02	99674765	99675525		A02	93894291	93895187		A02	6605652	6605985		A01	111211972	111212855
A02	571169	575931		A02	99783457	99784742		A02	93899797	93902284		A02	6703817	6704553		A01	111217482	111218456
A02	586702	589310		A02	99807811	99808584		A02	93940302	93941470		A02	6706224	6711330		A01	111248154	111248897
A02	603704	605673		A02	99835761	99840291		A02	93973158	93974246		A02	6725819	6727031		A01	111257206	111257721
A02	633017	635416		A02	99913717	99923200		A02	93998924	94002705		A02	6739717	6740521		A01	111259161	111262494
A02	639625	643103		A02	99938159	99938643		A02	93992221	93997758		A02	6785694	6786720		A01	111274394	111276501
A02	646242	648057		A02	99989510	99993568		A02	94074247	94082739		A02	6831882	6834323		A01	111281821	111282656
A02	650712	652679		A02	100007610	100013876		A02	94168898	94169708		A02	6836519	6837758		A01	111284008	111284533
A02	666770	672940		A02	100318637	100322991		A02	94190440	94194015		A02	6841258	6841933		A01	111296261	111297095
A02	674930	676185		A02	100341372	100349524		A02	94343053	94344088		A02	6953592	6954841		A01	111302343	111304117
A02	686562	687264		A02	100353702	100355348		A02	94389373	94392920		A02	6966133	6966697		A01	111341487	111342618
A02	690198	690788		A02	100357008	100357786		A02	94505232	94508329		A02	6968252	6971921		A01	111354347	111355774
A02	697817	699482		A02	100370155	100375128		A02	94509634	94510164		A02	6984635	6986075		A01	111400250	111401234
A02	720832	723649		A02	100380195	100407508		A02	94625122	94626692		A02	7005154	7006004		A01	111412709	111413365
A02	730055	732445		A02	100421836	100442113		A02	94664919	94670103		A02	7050048	7051419		A01	111421693	111422913
A02	749575	752224		A02	100592286	100592880		A02	94749162	94755353		A02	7157028	7157650		A01	111426736	111427919
A02	762942	764424		A02	100607873	100608515		A02	94777467	94778703		A02	7192147	7192762		A01	111446327	111446918
A02	770734	772187		A02	100646975	100647448		A02	94801641	94802991		A02	7193733	7195059		A01	111457932	111459493
A02	795017	796568		A02	100772855	100776623		A02	94911064	94912303		A02	7218569	7219665		A01	111466820	111467663
A02	801967	803342		A02	100844840	100846337		A02	94979752	94981475		A02	7239531	7241243		A01	111492973	111493648
A02	809779	810963		A02	101054170	101055100		A02	95040141	95040869		A02	7291503	7293379		A01	111526548	111528140
A02	814614	815628		A02	101076230	101086674		A02	95065076	95065749		A02	7297295	7298147		A01	111531781	111532778
A02	822538	823664		A02	101094936	101095839		A02	95090638	95092562		A02	7337880	7339322		A01	111535302	111537921
A02	893123	896748		A02	101124158	101130498		A02	95114431	95116488		A02	7351660	7354621		A01	111567579	111569204
A02	905136	914266		A02	101133452	101134235		A02	95117417	95119356		A02	7443916	7445583		A01	111593912	111596962
A02	927183	928253		A02	101138351	101139635		A02	95216517	95217232		A02	7525474	7528733		A01	111608959	111609752
A02	945761	946602		A02	101143128	101144057		A02	95438933	95445627		A02	7532266	7535565		A01	111639019	111640317
A02	969213	972718		A02	101146069	101146725		A02	95661162	95662763		A02	7550292	7550997		A01	111647888	111649755
A02	991394	995243		A02	101153682	101155041		A02	96147126	96149538		A02	7580803	7581717		A01	111652584	111653823
A02	999292	1006387		A02	101176179	101177815		A02	96244733	96251856		A02	7588393	7589655		A01	111665634	111666741
A02	1029034	1033035		A02	101264364	101265060		A02	96268418	96270775		A02	7621496	7623779		A01	111684491	111687655
A02	1046324	1047449		A02	101277491	101278258		A02	96328144	96341745		A02	7633507	7634232		A01	111698001	111700138
A02	1085583	1093107		A02	101299955	101301465		A02	96419346	96420218		A02	7649753	7652487		A01	111722536	111725026
A02	1113559	1116192		A02	101308829	101326909		A02	96450448	96455105		A02	7715468	7716981		A02	17618	18757
A02	1120734	1121300		A02	101334305	101335218		A02	96469230	96471257		A02	7761453	7765153		A02	19791	22897
A02	1122745	1124443		A02	101358975	101359576		A02	96545460	96552126		A02	7767304	7768399		A02	56341	57295
A02	1137513	1138149		A02	101377354	101378444		A02	96658720	96662100		A02	7852932	7857280		A02	59594	63685
A02	1155033	1158296		A02	101426385	101427178		A02	96679241	96683140		A02	7866553	7867401		A02	67977	71250
A02	1216120	1218269		A02	101431974	101432680		A02	96720880	96721520		A02	7935457	7939511		A02	74807	77208
A02	1235669	1236898		A02	101457750	101458285		A02	96789048	96791998		A02	8014644	8016074		A02	83676	88248
A02	1271483	1272893		A02	101476060	101477421		A02	96921027	96926229		A02	8011231	8013127		A02	92443	93629
A02	1308264	1309621		A02	101483771	101521214		A02	97206753	97207540		A02	8045468	8048875		A02	97461	98756
A02	1376186	1377868		A02	101537389	101538055		A02	97354387	97355174		A02	8093606	8094865		A02	102018	103164
A02	1380160	1381902		A02	101578679	101590382		A02	97394971	97402518		A02	8123277	8124953		A02	111714	112335
A02	1462702	1463586		A02	101597189	101597912		A02	97613685	97617823		A02	8127893	8128640		A02	118856	123184
A02	1483283	1484030		A02	101609320	101610225		A02	97645101	97646506		A02	8130693	8131738		A02	140595	142961
A02	1498622	1499239		A02	101682231	101682878		A02	97718585	97720884		A02	8135876	8136673		A02	145178	146694
A02	1518966	1520335		A02	101701354	101701935		A02	97841971	97844820		A02	8245997	8246843		A02	147777	150671
A02	1563748	1565054		A02	101707452	101708745		A02	97864354	97870041		A02	8253901	8254473		A02	152039	153666
A02	1575766	1579289		A02	101745919	101746677		A02	97892258	97895008		A02	8272803	8274034		A02	157372	160834
A02	1592210	1594526		A02	101767420	101770789		A02	97900787	97902891		A02	8319893	8321346		A02	166675	168674
A02	1659454	1659948		A02	101798739	101800019		A02	97934620	97937219		A02	8334908	8338622		A02	183015	184111
A02	1678357	1679330		A02	101805280	101806044		A02	98213951	98214739		A02	8358031	8359479		A02	191551	192713
A02	1700930	1703774		A02	101835953	101836562		A02	98298408	98301265		A02	8369849	8372566		A02	198688	201497
A02	1724272	1725372		A02	101849376	101850183		A02	98374070	98378161		A02	8377428	8378068		A02	214721	216021
A02	1745614	1746359		A02	101925072	101925707		A02	98432068	98436272		A02	8390415	8392474		A02	217819	219094
A02	1747618	1749370		A02	101934681	101935459		A02	98535752	98539213		A02	8403809	8406785		A02	232162	233175
A02	1759534	1761935		A02	101945979	101946536		A02	98561609	98564825		A02	8465430	8470255		A02	236840	238676
A02	1764007	1765716		A02	101982892	101983472		A02	98574746	98577959		A02	8575009	8575912		A02	245277	246636
A02	1783102	1785255		A02	101990027	102005568		A02	98662322	98663608		A02	8660837	8662682		A02	253893	255061
A02	1804834	1805808		A02	102007391	102008050		A02	98688531	98690816		A02	8689077	8689862		A02	259798	264878
A02	1809153	1811019		A02	102029852	102032028		A02	98757274	98760491		A02	8709053	8711109		A02	277554	279879
A02	1813115	1817632		A02	102081765	102082481		A02	98763064	98768864		A02	8718416	8721496		A02	292038	293367
A02	1854557	1855306		A02	102103724	102105316		A02	98787084	98789311		A02	8750513	8753294		A02	298302	308768
A02	1872709	1873724		A02	102120507	102121612		A02	98793659	98798082		A02	8761982	8762725		A02	311026	311866
A02	1901043	1902954		A02	102124871	102126301		A02	98799523	98802593		A02	8787976	8800197		A02	315729	319095
A02	1904744	1906527		A02	102131329	102132760		A02	98910118	98914227		A02	8801277	8802083		A02	321843	323008
A02	1957470	1959969		A02	102168184	102169027		A02	98934725	98935375		A02	8819896	8822068		A02	326195	327582
A02	1985368	1987346		A03	61178	62835		A02	98974801	98978529		A02	9089672	9092272		A02	358839	361721
A02	2000556	2002145		A03	84696	85413		A02	99099764	99100483		A02	9095491	9096439		A02	366057	367096
A02	1998060	1999026		A03	97035	97805		A02	99180424	99183738		A02	9154744	9157551		A02	382473	383510
A02	2003208	2004648		A03	103078	103881		A02	99186229	99186755		A02	9170201	9171482		A02	396351	397567
A02	2036526	2038550		A03	116366	118916		A02	99189716	99193690		A02	9187270	9188475		A02	422959	423894
A02	2045718	2048830		A03	134013	134967		A02	99205410	99207595		A02	9198511	9204359		A02	452002	453279
A02	2050726	2052657		A03	138932	140080		A02	99221176	99224965		A02	9206690	9208158		A02	460250	461441
A02	2070885	2072423		A03	158653	175324		A02	99240781	99243991		A02	9289036	9289880		A02	471701	473269
A02	2077566	2079066		A03	228941	229557		A02	99255165	99256971		A02	9360323	9361295		A02	477906	478902
A02	2082043	2082665		A03	259120	266817		A02	99304759	99307448		A02	9365203	9368130		A02	488271	490449
A02	2106534	2108085		A03	269346	272446		A02	99381590	99385619		A02	9380283	9381265		A02	515384	516308
A02	2116260	2117728		A03	284787	290914		A02	99390396	99394506		A02	9386800	9387638		A02	518636	522264
A02	2132737	2135854		A03	293463	299056		A02	99396819	99400581		A02	9405610	9406524		A02	542708	543486
A02	2161939	2162623		A03	304022	310398		A02	99422138	99424423		A02	9439811	9441814		A02	551874	552389
A02	2176010	2178314		A03	325117	326010		A02	99446424	99448085		A02	9453047	9454749		A02	558956	560130
A02	2191519	2193877		A03	346395	347190		A02	99449343	99453522		A02	9511076	9512322		A02	571128	575857
A02	2197763	2198734		A03	464782	468850		A02	99473686	99474763		A02	9585036	9587659		A02	586707	587357
A02	2200433	2204909		A03	470013	473055		A02	99484593	99488665		A02	9688281	9690328		A02	603703	604710
A02	2219961	2221789		A03	488710	492361		A02	99556665	99557490		A02	9771474	9778186		A02	631011	631635
A02	2242119	2243647		A03	532594	534865		A02	99562253	99565077		A02	9798985	9801509		A02	634173	635089
A02	2267813	2273542		A03	540156	541014		A02	99576912	99583585		A02	9824753	9826247		A02	639663	640517
A02	2416313	2418396		A03	585297	586043		A02	99617015	99619137		A02	9832647	9833792		A02	646242	647139
A02	2428555	2430436		A03	616990	617828		A02	99674700	99676440		A02	9852293	9853150		A02	651464	652097
A02	2441126	2443311		A03	632895	640945		A02	99733876	99734568		A02	9876119	9876995		A02	656176	656936
A02	2446084	2447379		A03	677529	678132		A02	99740901	99744615		A02	9880296	9882948		A02	660929	664695
A02	2475507	2476605		A03	706733	714076		A02	99783465	99785661		A02	9933218	9934323		A02	666062	667347
A02	2514888	2515517		A03	742441	743100		A02	99803288	99805856		A02	9985930	9987553		A02	670145	672738
A02	2543316	2547337		A03	774233	774758		A02	99807726	99812570		A02	10015909	10016416		A02	690181	690900
A02	2550775	2554936		A03	776767	777749		A02	99846775	99847866		A02	10077091	10079922		A02	696951	699019
A02	2557956	2560821		A03	788102	804360		A02	99884792	99885675		A02	10266833	10268240		A02	809786	810741
A02	2596625	2598091		A03	806076	806974		A02	99911774	99912587		A02	10289418	10290279		A02	854512	855398
A02	2670254	2671175		A03	830033	830981		A02	99938141	99938649		A02	10303248	10304429		A02	863856	865447
A02	2680413	2681048		A03	852239	854754		A02	99947596	99948537		A02	10326176	10327239		A02	879763	880697
A02	2682998	2683744		A03	858055	859052		A02	100322125	100326602		A02	10333936	10334650		A02	887084	888028
A02	2883247	2886642		A03	876639	877386		A02	100357114	100360780		A02	10454902	10456161		A02	895567	896786
A02	2910529	2916498		A03	940104	940983		A02	100488734	100489192		A02	10458531	10460494		A02	905168	910003
A02	2979896	2981085		A03	944755	945344		A02	100492164	100492822		A02	10494237	10495589		A02	911036	914468
A02	3065589	3071252		A03	998144	998664		A02	100530179	100533791		A02	10549099	10549627		A02	927225	928429
A02	3118118	3122424		A03	1016312	1018816		A02	100581521	100582519		A02	10592321	10595957		A02	969166	971368
A02	3140045	3141172		A03	1025139	1026254		A02	100592285	100595025		A02	10657782	10660678		A02	978744	979649
A02	3180898	3182166		A03	1032501	1042843		A02	100596908	100601102		A02	10675289	10677116		A02	991434	992350
A02	3188341	3190449		A03	1068149	1070137		A02	100606234	100608526		A02	10691157	10693813		A02	999382	999875
A02	3191719	3194051		A03	1090282	1110049		A02	100623160	100626821		A02	10721703	10722372		A02	1009367	1010211
A02	3208911	3209608		A03	1131966	1149637		A02	100630784	100632688		A02	10754617	10755706		A02	1028928	1030052
A02	3219011	3221341		A03	1203199	1204071		A02	100714163	100723147		A02	10770889	10771872		A02	1046391	1047547
A02	3254816	3255951		A03	1209080	1209757		A02	100743534	100747478		A02	10795078	10795656		A02	1056128	1059626
A02	3257490	3259485		A03	1225438	1231685		A02	100774823	100776529		A02	10872394	10873262		A02	1073856	1074451
A02	3302888	3303425		A03	1255890	1262442		A02	100799035	100799593		A02	11039245	11040323		A02	1076561	1077276
A02	3305926	3306405		A03	1283429	1290618		A02	100845571	100846381		A02	11168878	11174339		A02	1085646	1087201
A02	3309962	3310587		A03	1313841	1314453		A02	100852504	100854364		A02	11215632	11217427		A02	1090799	1092265
A02	3316357	3316791		A03	1318705	1325561		A02	100865017	100865550		A02	11271623	11272637		A02	1094276	1096834
A02	3322486	3322917		A03	1371782	1373215		A02	100964114	100966983		A02	11278524	11282738		A02	1108147	1108681
A02	3328761	3329320		A03	1388526	1389601		A02	100984575	100985520		A02	11321197	11322656		A02	1115237	1116242
A02	3333815	3335897		A03	1399070	1399546		A02	101031843	101033943		A02	11323681	11324629		A02	1120716	1121244
A02	3338277	3341031		A03	1409082	1409978		A02	101053051	101055146		A02	11451284	11451824		A02	1122634	1124371
A02	3369631	3371284		A03	1415726	1416416		A02	101092336	101095852		A02	11649072	11650165		A02	1137496	1138187
A02	3389415	3390404		A03	1467775	1468292		A02	101133495	101136229		A02	11658416	11659746		A02	1155139	1157081
A02	3394239	3397936		A03	1495273	1504959		A02	101138338	101141102		A02	11687649	11691760		A02	1205892	1206508
A02	3433212	3435126		A03	1568015	1568866		A02	101143118	101143932		A02	11693433	11696166		A02	1213442	1214250
A02	3442521	3444555		A03	1606618	1607304		A02	101175981	101177852		A02	11707565	11709647		A02	1217420	1218260
A02	3451752	3453813		A03	1614813	1615578		A02	101277401	101280161		A02	11728408	11730092		A02	1272040	1272892
A02	3519129	3519767		A03	1629332	1629850		A02	101305048	101305894		A02	11775710	11776713		A02	1274999	1275768
A02	3528239	3529956		A03	1638571	1639152		A02	101334420	101338396		A02	11789363	11791098		A02	1326229	1326995
A02	3538086	3538470		A03	1699760	1700941		A02	101342239	101345226		A02	11871958	11873508		A02	1376217	1378111
A02	3559000	3561814		A03	1740912	1769601		A02	101346441	101350793		A02	11877042	11879165		A02	1380395	1381900
A02	3567737	3569611		A03	1781156	1832092		A02	101377487	101383366		A02	11939325	11942243		A02	1449732	1451170
A02	3576295	3583645		A03	1895565	1896259		A02	101396267	101397085		A02	12035759	12036647		A02	1462920	1463598
A02	3624111	3624769		A03	1938520	1951615		A02	101425282	101427263		A02	12097504	12098504		A02	1483266	1484014
A02	3645833	3647094		A03	1991023	2001306		A02	101428171	101432813		A02	12125193	12126035		A02	1488931	1489597
A02	3651091	3651910		A03	2014915	2031508		A02	101467195	101468643		A02	12130406	12131592		A02	1511835	1512896
A02	3692710	3695823		A03	2058992	2069234		A02	101504414	101504777		A02	12171013	12174711		A02	1518919	1520132
A02	3703799	3705575		A03	2084718	2093549		A02	101523132	101528667		A02	12242888	12243563		A02	1524806	1525808
A02	3707624	3710415		A03	2105424	2121504		A02	101537293	101540233		A02	12252634	12256883		A02	1535394	1536527
A02	3719177	3724495		A03	2136704	2145083		A02	101570363	101572215		A02	12300339	12302444		A02	1546466	1547255
A02	3731935	3738033		A03	2173849	2174486		A02	101592356	101593886		A02	12450404	12451717		A02	1564005	1565057
A02	3747689	3750903		A03	2289104	2289895		A02	101597116	101597927		A02	12988646	12990249		A02	1575795	1576509
A02	3752175	3754179		A03	2328307	2329822		A02	101606617	101610241		A02	13059383	13060557		A02	1593599	1594540
A02	3769973	3772799		A03	2356644	2357843		A02	101611381	101615046		A02	13070270	13071504		A02	1671566	1672291
A02	3793316	3795403		A03	2379246	2389811		A02	101628299	101651201		A02	13078998	13080616		A02	1702298	1703780
A02	3814045	3816408		A03	2485106	2488450		A02	101665410	101673563		A02	13124663	13125591		A02	1745579	1746378
A02	3847329	3848198		A03	2492381	2496250		A02	101682261	101682715		A02	13214647	13215761		A02	1747560	1750932
A02	3849588	3850484		A03	2521279	2522058		A02	101694327	101697221		A02	13239677	13241802		A02	1760882	1761943
A02	3861546	3862525		A03	2541931	2544891		A02	101711888	101715336		A02	13281625	13283395		A02	1764006	1765657
A02	3871121	3871937		A03	2647965	2648938		A02	101727173	101731054		A02	13714156	13716629		A02	1783109	1785383
A02	3874576	3878342		A03	2707693	2717606		A02	101745868	101748022		A02	13754482	13758726		A02	1804417	1805744
A02	3879941	3885786		A03	2728244	2746662		A02	101756758	101757903		A02	13762907	13763998		A02	1813115	1814740
A02	3887559	3887993		A03	2804744	2812200		A02	101798719	101802828		A02	13874861	13875848		A02	1873013	1873725
A02	3915750	3916823		A03	2815177	2831567		A02	101805257	101807332		A02	13882035	13884987		A02	1904716	1905959
A02	3918156	3919764		A03	2839037	2857084		A02	101808774	101810207		A02	13886304	13887486		A02	1957508	1958327
A02	3923301	3925025		A03	2938308	2939551		A02	101824279	101824994		A02	13949007	13949878		A02	1998118	1998821
A02	3946619	3949425		A03	2968635	2975620		A02	101825869	101829923		A02	13978435	13979757		A02	2003184	2004229
A02	3957735	3960331		A03	2979201	2985784		A02	101832538	101836763		A02	13997721	13999792		A02	2047492	2049146
A02	3972167	3973097		A03	2996034	2997270		A02	101846897	101850189		A02	14020950	14023482		A02	2050543	2052657
A02	3991621	3993875		A03	3004265	3004816		A02	101897888	101898427		A02	14086116	14087615		A02	2081982	2082716
A02	4038887	4041573		A03	3041609	3048071		A02	101905640	101913377		A02	14245665	14251506		A02	2119171	2119680
A02	4066295	4067380		A03	3081391	3082627		A02	101918810	101923502		A02	14256369	14258235		A02	2132740	2133811
A02	4071710	4074226		A03	3091678	3094294		A02	101925056	101927650		A02	14489650	14490544		A02	2137541	2140259
A02	4079700	4084033		A03	3143410	3144488		A02	101929602	101933259		A02	14624108	14626987		A02	2191528	2193007
A02	4085210	4087170		A03	3167345	3172207		A02	101934649	101937155		A02	14628135	14629619		A02	2197824	2199248
A02	4089326	4090209		A03	3173502	3174441		A02	101945896	101952882		A02	14653322	14654336		A02	2200691	2203036
A02	4092985	4093529		A03	3181567	3182474		A02	101958755	101962306		A02	14660037	14660897		A02	2216039	2217794
A02	4124928	4125720		A03	3411650	3412692		A02	101963919	101964495		A02	14861688	14862221		A02	2220809	2221790
A02	4169534	4170744		A03	3461638	3463473		A02	101981503	101983507		A02	14867159	14871482		A02	2242103	2243836
A02	4184012	4188375		A03	3482510	3483164		A02	102007383	102009239		A02	14874681	14875057		A02	2249315	2249858
A02	4212522	4213641		A03	3706917	3720705		A02	102029853	102032690		A02	14949619	14951209		A02	2255270	2256587
A02	4321351	4322116		A03	3770441	3771044		A02	102089081	102090702		A02	14972907	14975615		A02	2263589	2264542
A02	4437502	4438765		A03	3780798	3781439		A02	102092173	102110785		A02	14995573	14996313		A02	2272502	2273498
A02	4454917	4455392		A03	3818325	3819184		A02	102123280	102126301		A02	14999774	15003349		A02	2306878	2308426
A02	4478531	4481457		A03	3832175	3833033		A02	102131674	102132882		A02	15020098	15023016		A02	2446084	2447309
A02	4527176	4530037		A03	3864135	3864989		A02	102156962	102169135		A02	15027603	15028959		A02	2467865	2468596
A02	4535224	4539493		A03	3871150	3872043		A03	58603	66582		A02	15168830	15171866		A02	2470636	2471397
A02	4541935	4544560		A03	3912363	3913368		A03	71410	75657		A02	15216915	15218092		A02	2475494	2476601
A02	4566908	4569696		A03	3933145	3933989		A03	84607	88137		A02	15245889	15246668		A02	2493075	2494454
A02	4572700	4573810		A03	3942336	3947076		A03	95160	97816		A02	15283750	15284504		A02	2519991	2520987
A02	4594442	4595181		A03	4001850	4002725		A03	99457	103969		A02	15290864	15291399		A02	2526995	2528046
A02	4671589	4672328		A03	4005416	4006354		A03	116143	116863		A02	15384299	15385523		A02	2543399	2544040
A02	4767183	4767974		A03	4022416	4023397		A03	117771	126383		A02	15669068	15674554		A02	2553993	2554952
A02	4781662	4782432		A03	4082056	4084760		A03	133879	140098		A02	15982614	15985047		A02	2560136	2560761
A02	4819680	4820466		A03	4108493	4109293		A03	148262	153007		A02	16112425	16114753		A02	2563686	2564418
A02	4830713	4832521		A03	4142966	4144265		A03	198751	202718		A02	16183783	16184744		A02	2596484	2598213
A02	4837112	4841450		A03	4145584	4150436		A03	205550	208768		A02	16490879	16492376		A02	2658695	2659576
A02	4844260	4845525		A03	4157946	4159201		A03	221185	223378		A02	16549016	16549867		A02	2725765	2728330
A02	4846662	4847389		A03	4172534	4173260		A03	225404	229602		A02	16564246	16568326		A02	2884746	2887707
A02	4864789	4867286		A03	4200827	4204329		A03	230966	237484		A02	16816949	16820325		A02	2906748	2908915
A02	4869716	4870288		A03	4222380	4223242		A03	307010	308441		A02	16975981	16977263		A02	2915227	2916499
A02	4874351	4877676		A03	4227295	4228646		A03	309341	310324		A02	16988233	16989231		A02	2935934	2936857
A02	4885294	4886874		A03	4248225	4256124		A03	317524	318139		A02	16993457	16994706		A02	2995630	2996244
A02	4935022	4938039		A03	4315958	4321698		A03	323555	326077		A02	17308969	17310271		A02	3022126	3023426
A02	4951977	4953717		A03	4329283	4329944		A03	333840	336109		A02	17353949	17355500		A02	3065606	3066679
A02	5002218	5005494		A03	4348491	4349319		A03	341738	347209		A02	17366559	17369646		A02	3072324	3074268
A02	5027510	5030078		A03	4354202	4354792		A03	469988	470987		A02	17378876	17381783		A02	3087624	3088646
A02	5048339	5051698		A03	4357748	4361905		A03	532246	536354		A02	17398409	17400105		A02	3101952	3102496
A02	5058114	5059106		A03	4375096	4375775		A03	537894	540977		A02	17865030	17866227		A02	3121100	3122417
A02	5094692	5096601		A03	4392363	4393183		A03	568135	570806		A02	18071989	18072784		A02	3124758	3127278
A02	5159452	5160390		A03	4413778	4416033		A03	585229	587648		A02	18242213	18243121		A02	3139985	3141024
A02	5189677	5190498		A03	4433553	4434106		A03	613715	617880		A02	18303063	18305391		A02	3152248	3153174
A02	5206272	5206914		A03	4459247	4468946		A03	677483	678169		A02	18519403	18520372		A02	3174244	3175212
A02	5275731	5276173		A03	4480760	4481406		A03	721522	727503		A02	18536389	18538056		A02	3177617	3178262
A02	5280568	5283968		A03	4488823	4489640		A03	742442	745215		A02	18552113	18554264		A02	3180864	3181937
A02	5290271	5292346		A03	4491737	4505936		A03	772571	774832		A02	18564649	18565648		A02	3188375	3189757
A02	5293833	5296795		A03	4519415	4520281		A03	854078	859113		A02	18712711	18713679		A02	3191698	3192563
A02	5315749	5316854		A03	4569922	4571185		A03	849147	853102		A02	18768266	18768865		A02	3199158	3200147
A02	5320034	5321517		A03	4577958	4578740		A03	860378	864208		A02	19027071	19027429		A02	3208748	3210029
A02	5323823	5326735		A03	4585091	4585875		A03	876584	886178		A02	19193718	19199190		A02	3218989	3221143
A02	5373103	5375334		A03	4601013	4602800		A03	918215	919584		A02	19417073	19419936		A02	3254823	3259483
A02	5378503	5381072		A03	4635882	4636723		A03	939989	940918		A02	19721183	19722293		A02	3269778	3272659
A02	5386441	5388146		A03	4655199	4656465		A03	944664	946769		A02	19899156	19899754		A02	3283510	3283939
A02	5397637	5398236		A03	4876452	4880173		A03	983919	985566		A02	19901751	19903133		A02	3302878	3304530
A02	5399744	5401414		A03	4899778	4900570		A03	996122	998658		A02	20021308	20023083		A02	3305929	3306534
A02	5406286	5409931		A03	4963808	4964330		A03	1004287	1007092		A02	20072691	20078115		A02	3309998	3310533
A02	5421192	5422044		A03	5006833	5007261		A03	1111213	1111927		A02	20345885	20348728		A02	3316319	3316835
A02	5446296	5450190		A03	5098579	5099408		A03	1170646	1172560		A02	20384685	20386185		A02	3322485	3322938
A02	5455141	5456891		A03	5118155	5118732		A03	1193852	1195973		A02	20405567	20407323		A02	3324927	3325927
A02	5464318	5465653		A03	5134295	5141178		A03	1201909	1204153		A02	20592607	20594195		A02	3328910	3329284
A02	5472149	5473728		A03	5274937	5277420		A03	1209056	1209657		A02	20598107	20599671		A02	3335170	3335881
A02	5477482	5478322		A03	5296477	5297217		A03	1387035	1389710		A02	20616330	20618014		A02	3338264	3339155
A02	5581976	5583630		A03	5355907	5380664		A03	1399067	1403469		A02	20798074	20798304		A02	3369611	3371016
A02	5896895	5902286		A03	5383586	5387361		A03	1406333	1408102		A02	20817723	20822484		A02	3451718	3453489
A02	5924615	5926204		A03	5390937	5391594		A03	1409018	1411416		A02	20823480	20824931		A02	3458482	3459936
A02	5996362	5997129		A03	5425549	5435848		A03	1415728	1416410		A02	20856189	20857463		A02	3461078	3461703
A02	6005902	6009727		A03	5493736	5516333		A03	1467763	1469800		A02	20870971	20872422		A02	3465778	3468104
A02	6011275	6012057		A03	5539274	5545276		A03	1567952	1571139		A02	20972518	20975057		A02	3508474	3509120
A02	6017658	6019918		A03	5573118	5582230		A03	1572527	1574738		A02	21051087	21052510		A02	3527985	3529973
A02	6041389	6041886		A03	5620407	5620965		A03	1606519	1612738		A02	21331245	21334861		A02	3537737	3538712
A02	6069117	6074056		A03	5869758	5878835		A03	1614787	1619009		A02	21361479	21367781		A02	3549213	3550263
A02	6075164	6076630		A03	5895518	5896614		A03	1629355	1629852		A02	21730168	21731372		A02	3558836	3562651
A02	6095438	6096172		A03	5909463	5910264		A03	1638520	1643237		A02	22747345	22748580		A02	3567738	3569104
A02	6109411	6111890		A03	6010218	6011170		A03	1645612	1648968		A02	22969319	22970429		A02	3572990	3573419
A02	6114408	6116165		A03	6015485	6016738		A03	1780442	1781918		A02	22999376	23000100		A02	3576296	3577012
A02	6120019	6123203		A03	6035814	6036721		A03	1895538	1897696		A02	23850692	23852160		A02	3591239	3592442
A02	6179330	6181037		A03	6174534	6175234		A03	1912697	1914452		A02	23856581	23857435		A02	3601664	3602702
A02	6187068	6187543		A03	6224337	6225525		A03	1934411	1936775		A02	24059086	24060149		A02	3611917	3613577
A02	6192644	6194961		A03	6263227	6263748		A03	1977778	1978194		A02	24159936	24162090		A02	3620972	3622900
A02	6196672	6200959		A03	6265052	6270045		A03	1990257	1991688		A02	24382138	24383612		A02	3624138	3624776
A02	6272392	6273715		A03	6359207	6359915		A03	2068588	2070441		A02	24420977	24422015		A02	3633804	3634369
A02	6323153	6324055		A03	6431176	6436783		A03	2170337	2174517		A02	24647132	24648793		A02	3651179	3651855
A02	6416772	6417343		A03	6515832	6516788		A03	2272330	2274293		A02	24829531	24830469		A02	3664407	3665139
A02	6427147	6429076		A03	6802110	6807353		A03	2279753	2280494		A02	24927009	24928758		A02	3692704	3696312
A02	6450382	6452079		A03	6868320	6871100		A03	2289069	2291233		A02	25001057	25001620		A02	3703810	3705607
A02	6457714	6460332		A03	6883013	6883989		A03	2313001	2315385		A02	25159884	25160773		A02	3706887	3710457
A02	6610935	6612152		A03	6892581	6895133		A03	2356632	2357874		A02	25194178	25195610		A02	3719229	3721046
A02	6703108	6704580		A03	6915521	6918621		A03	2477298	2480906		A02	25434221	25435279		A02	3731936	3733981
A02	6707056	6708342		A03	6972715	6978194		A03	2495508	2496964		A02	25827874	25829400		A02	3739442	3740092
A02	6709995	6713336		A03	6985244	6992795		A03	2553604	2555701		A02	25989228	25992207		A02	3747698	3748870
A02	6785146	6786761		A03	7046070	7046599		A03	2578888	2580520		A02	26032571	26033370		A02	3752253	3752961
A02	6811541	6812760		A03	7057256	7058981		A03	2647957	2649617		A02	26049505	26051971		A02	3793113	3795527
A02	6834672	6837813		A03	7083943	7084504		A03	2656315	2658605		A02	26116112	26116747		A02	3806753	3807754
A02	6953614	6954366		A03	7085740	7086362		A03	2678548	2680051		A02	26138701	26139897		A02	3814044	3814944
A02	6966091	6966759		A03	7205155	7210968		A03	2693969	2698221		A02	26181302	26182796		A02	3827756	3828194
A02	6977805	6981388		A03	7273044	7280796		A03	2718658	2719351		A02	26194554	26195943		A02	3858408	3859208
A02	6991764	6993059		A03	7305109	7307628		A03	2735621	2736103		A02	26215290	26216320		A02	3877080	3878403
A02	7005154	7008474		A03	7313579	7314234		A03	2772643	2774773		A02	26233645	26235514		A02	3879558	3884572
A02	7012418	7014965		A03	7338365	7339163		A03	2938398	2941175		A02	26461446	26462503		A02	3887587	3887993
A02	7050048	7051784		A03	7446051	7446985		A03	2994780	2997312		A02	26530983	26532179		A02	3910351	3912412
A02	7060300	7062668		A03	7470785	7471543		A03	3001755	3004883		A02	26879058	26880069		A02	3918914	3919763
A02	7156759	7157670		A03	7508714	7509397		A03	3016655	3019641		A02	26882652	26884198		A02	3924124	3925101
A02	7191935	7193963		A03	7545735	7546383		A03	3034230	3034832		A02	27080473	27081599		A02	3946625	3949542
A02	7200862	7202720		A03	7557433	7562861		A03	3081226	3082608		A02	27797951	27799063		A02	3957749	3958557
A02	7234985	7237417		A03	7593489	7594598		A03	3163296	3165721		A02	27835558	27838237		A02	3961569	3962735
A02	7239539	7241279		A03	7706598	7707301		A03	3173492	3175489		A02	28218966	28220239		A02	3991615	3993803
A02	7291409	7292855		A03	7719485	7728058		A03	3181540	3183420		A02	28234326	28236587		A02	4011321	4015810
A02	7337958	7339362		A03	7769917	7775843		A03	3196914	3197946		A02	28432649	28435774		A02	4047474	4048816
A02	7351492	7353671		A03	7783145	7784205		A03	3212142	3213977		A02	28723740	28726235		A02	4072966	4074228
A02	7532282	7534991		A03	7855807	7863641		A03	3289705	3292756		A02	28918865	28921194		A02	4079691	4080478
A02	7580839	7581678		A03	8032735	8033445		A03	3307339	3314296		A02	30091289	30092387		A02	4081678	4083611
A02	7587110	7589678		A03	8059262	8060040		A03	3330874	3337393		A02	30138615	30139474		A02	4086064	4087165
A02	7620852	7623797		A03	8090262	8091635		A03	3341913	3344157		A02	30147079	30149492		A02	4088976	4090271
A02	7633562	7635452		A03	8123782	8125461		A03	3355215	3359450		A02	30158524	30161513		A02	4092998	4093559
A02	7649468	7652508		A03	8278223	8279012		A03	3363353	3365461		A02	30411087	30412509		A02	4124075	4125704
A02	7751341	7759333		A03	8338602	8339455		A03	3385804	3386222		A02	30834675	30836135		A02	4169494	4172259
A02	7761457	7762682		A03	8361416	8364089		A03	3391021	3393298		A02	31191823	31193506		A02	4178484	4180390
A02	7787956	7790130		A03	8392299	8394256		A03	3399426	3402352		A02	31635402	31636159		A02	4181369	4182247
A02	7803226	7804669		A03	8516613	8524308		A03	3406736	3412713		A02	32216391	32217809		A02	4184753	4185640
A02	7805699	7807066		A03	8666406	8667080		A03	3431609	3438433		A02	32687684	32692290		A02	4193713	4194887
A02	7811792	7812499		A03	8713561	8714447		A03	3455418	3457451		A02	32704202	32705775		A02	4321442	4321951
A02	7864182	7864837		A03	8853034	8856673		A03	3477008	3483200		A02	33083194	33084409		A02	4338206	4338715
A02	7866651	7867370		A03	8889715	8890489		A03	3593412	3596428		A02	33131478	33133478		A02	4409064	4410441
A02	7919591	7925406		A03	8940048	8941124		A03	3600662	3603061		A02	33155851	33156727		A02	4423948	4424491
A02	7927976	7930811		A03	8993872	8997973		A03	3673403	3675095		A02	33418800	33420080		A02	4454816	4455392
A02	7935509	7937410		A03	9020406	9022860		A03	3676001	3679212		A02	33478034	33480121		A02	4478462	4481340
A02	7943802	7944534		A03	9061203	9062062		A03	3693853	3695663		A02	33686595	33687907		A02	4527102	4529873
A02	7950257	7955610		A03	9138221	9146486		A03	3726959	3728478		A02	33739841	33741003		A02	4531215	4531598
A02	7980455	7983365		A03	9285924	9286528		A03	3770330	3781482		A02	33963633	33964523		A02	4536705	4539332
A02	7986770	7987813		A03	9307540	9308132		A03	3818327	3821430		A02	33995896	33998628		A02	4541933	4544975
A02	8011204	8013297		A03	9349016	9349648		A03	3823850	3833052		A02	34866884	34867428		A02	4546021	4548805
A02	8046400	8048831		A03	9368901	9369882		A03	3844195	3848250		A02	34959291	34960281		A02	4568641	4569732
A02	8093587	8095999		A03	9397531	9403318		A03	3864133	3866108		A02	34975835	34976626		A02	4572712	4573917
A02	8107848	8108480		A03	9589930	9590608		A03	3869045	3872413		A02	35864778	35865498		A02	4594351	4596454
A02	8123124	8128541		A03	9608348	9609071		A03	3896174	3897252		A02	35876739	35877663		A02	4605686	4608688
A02	8130687	8133072		A03	9623153	9623791		A03	3912341	3913649		A02	35983404	35987987		A02	4627779	4628195
A02	8142617	8143240		A03	9909195	9910308		A03	3915211	3934005		A02	36616974	36618410		A02	4671598	4672261
A02	8245961	8248416		A03	9975080	9975923		A03	4001822	4013712		A02	36630926	36631542		A02	4713234	4714325
A02	8252190	8254472		A03	10057896	10058840		A03	4022266	4026260		A02	36816971	36818101		A02	4753877	4754846
A02	8260034	8262208		A03	10075449	10076269		A03	4062382	4065891		A02	37634177	37635781		A02	4767188	4767929
A02	8263381	8265075		A03	10274152	10275341		A03	4083817	4090605		A02	38650105	38650910		A02	4781685	4782375
A02	8358039	8359244		A03	10277281	10282647		A03	4157946	4160188		A02	38653826	38654864		A02	4819675	4820807
A02	8370103	8372469		A03	10360640	10361677		A03	4165043	4169530		A02	39062179	39062999		A02	4840391	4841436
A02	8377320	8378140		A03	11067156	11067982		A03	4172460	4177902		A02	39096252	39097170		A02	4844246	4847487
A02	8390344	8393574		A03	11221688	11224928		A03	4222350	4223715		A02	40246654	40249717		A02	4866270	4867302
A02	8466165	8469673		A03	11231137	11231997		A03	4227225	4230841		A02	40324696	40325359		A02	4869665	4870351
A02	8659793	8662340		A03	11318869	11319896		A03	4323832	4330009		A02	40402549	40403561		A02	4874352	4875215
A02	8707707	8710285		A03	11361773	11362607		A03	4348467	4351264		A02	40663328	40665210		A02	4895519	4896770
A02	8716712	8721498		A03	11504779	11510019		A03	4354138	4357250		A02	40677465	40678282		A02	4899791	4900854
A02	8751021	8752722		A03	11543049	11544017		A03	4375081	4386014		A02	40725584	40725821		A02	4926597	4927579
A02	8788531	8790870		A03	11551957	11552604		A03	4388472	4391045		A02	40847728	40851108		A02	4937173	4938048
A02	8792555	8795948		A03	11566651	11567531		A03	4392303	4395873		A02	40853739	40857631		A02	4953103	4953708
A02	8799309	8802096		A03	11582918	11583707		A03	4431742	4434316		A02	40858514	40859277		A02	5002397	5005140
A02	8819514	8822052		A03	11645983	11646629		A03	4435366	4439001		A02	41059166	41061460		A02	5027430	5029552
A02	9090435	9092276		A03	11651276	11652041		A03	4457449	4459886		A02	41082993	41084751		A02	5058099	5058627
A02	9093500	9096466		A03	11724434	11730770		A03	4480668	4484313		A02	41383708	41386691		A02	5095518	5096633
A02	9150095	9151628		A03	11775382	11776187		A03	4485659	4486465		A02	41438645	41440779		A02	5135515	5137662
A02	9153122	9155961		A03	11884420	11887040		A03	4487769	4489637		A02	41480391	41481290		A02	5189647	5190739
A02	9159010	9162063		A03	11906431	11907951		A03	4516336	4520281		A02	41508549	41508804		A02	5280550	5282400
A02	9164208	9165491		A03	11913799	11919287		A03	4569899	4572614		A02	41543337	41548657		A02	5285107	5287716
A02	9168886	9171492		A03	11938868	11939335		A03	4574930	4578781		A02	41551328	41552584		A02	5291710	5292298
A02	9187283	9192732		A03	11942535	11945142		A03	4585030	4587659		A02	42055646	42056702		A02	5293796	5296778
A02	9199538	9204245		A03	12041000	12041828		A03	4616017	4628335		A02	42099051	42101547		A02	5311859	5312722
A02	9206617	9208205		A03	12073267	12074083		A03	4635882	4640612		A02	42206320	42208219		A02	5315562	5317282
A02	9275145	9276179		A03	12132061	12134605		A03	4654994	4659020		A02	42234104	42235831		A02	5323817	5324519
A02	9282841	9284250		A03	12178989	12180088		A03	4661778	4664988		A02	42354005	42355612		A02	5337220	5338803
A02	9289036	9289881		A03	12184924	12188230		A03	4686627	4687988		A02	42351969	42352661		A02	5351369	5352562
A02	9318795	9320526		A03	12261498	12262323		A03	4691778	4694742		A02	42703815	42705790		A02	5356056	5357731
A02	9356010	9361301		A03	12290081	12290864		A03	4872714	4873346		A02	42717864	42718417		A02	5374256	5375333
A02	9365178	9369492		A03	12313511	12314193		A03	4891303	4900597		A02	42740283	42740686		A02	5378163	5381487
A02	9380281	9383396		A03	12453132	12453924		A03	4962784	4964405		A02	42823234	42823777		A02	5386103	5388126
A02	9386800	9387354		A03	12869624	12870609		A03	5069082	5078011		A02	42830005	42831193		A02	5397638	5398245
A02	9398992	9401464		A03	12920132	12920959		A03	5079880	5080902		A02	42836717	42837611		A02	5400590	5401444
A02	9404129	9406545		A03	12949612	12950241		A03	5094795	5099413		A02	42840922	42846309		A02	5408273	5409942
A02	9443821	9445613		A03	13442700	13451514		A03	5118131	5119858		A02	42863300	42866628		A02	5429840	5430503
A02	9452244	9454581		A03	13470820	13473142		A03	5272466	5279941		A02	42946937	42951110		A02	5446307	5449867
A02	9511043	9516352		A03	13477725	13478317		A03	5293000	5297272		A02	43205690	43208223		A02	5454494	5456843
A02	9585554	9587621		A03	13481278	13490572		A03	5316263	5322259		A02	43291509	43295144		A02	5472134	5473395
A02	9772664	9774315		A03	13517710	13524952		A03	5325557	5326681		A02	43343429	43344134		A02	5582555	5583627
A02	9799138	9801158		A03	13546786	13556373		A03	5388543	5391627		A02	43346516	43347433		A02	5896894	5897876
A02	9824744	9826701		A03	13606662	13607440		A03	5466860	5470425		A02	43354426	43355708		A02	5900658	5902193
A02	9828537	9833792		A03	13807683	13808375		A03	5559165	5564027		A02	43753389	43754662		A02	5924633	5926231
A02	9852344	9853137		A03	13814762	13815290		A03	5620357	5620993		A02	43756445	43757220		A02	5996311	5997064
A02	9875357	9877025		A03	13888391	13888904		A03	5644053	5644739		A02	43758207	43761240		A02	6003479	6004271
A02	9880255	9883020		A03	13987280	13987853		A03	5729677	5733239		A02	43762765	43763231		A02	6007265	6009086
A02	9933080	9936016		A03	14041649	14042436		A03	5778049	5780373		A02	43854439	43858512		A02	6017587	6019901
A02	9985808	9987555		A03	14234430	14235205		A03	5797821	5800251		A02	44006544	44009308		A02	6070212	6072790
A02	9993202	9993981		A03	14317672	14318540		A03	5808409	5814754		A02	44303133	44310011		A02	6074120	6076689
A02	9995459	9996254		A03	14391155	14391925		A03	5885874	5888944		A02	44406755	44408275		A02	6104043	6105453
A02	9997829	10000930		A03	14543750	14545433		A03	5893929	5896661		A02	44671424	44672807		A02	6111290	6111888
A02	10039918	10042137		A03	14577860	14578602		A03	5905813	5910318		A02	45099006	45101071		A02	6180088	6181078
A02	10062281	10063728		A03	14743859	14745030		A03	6010212	6012271		A02	45176247	45178059		A02	6192421	6194967
A02	10066299	10069247		A03	15102634	15106580		A03	6035730	6039007		A02	45257360	45258379		A02	6200037	6200987
A02	10266829	10268253		A03	15225945	15226694		A03	6043283	6043944		A02	45311317	45312170		A02	6216948	6217508
A02	10302306	10304435		A03	15229145	15239584		A03	6071134	6071664		A02	45426528	45427639		A02	6227220	6228250
A02	10326103	10327220		A03	15334165	15335108		A03	6075247	6080790		A02	45487470	45491246		A02	6236696	6237899
A02	10332076	10332630		A03	15408179	15408665		A03	6083812	6087025		A02	45517862	45518568		A02	6283522	6284231
A02	10333906	10334637		A03	15417911	15418713		A03	6089692	6097593		A02	45610524	45612641		A02	6376815	6377472
A02	10480460	10481745		A03	15561779	15562531		A03	6114931	6117862		A02	45691205	45693351		A02	6385054	6386113
A02	10491418	10492168		A03	15564596	15565217		A03	6124285	6126897		A02	46093262	46093989		A02	6543300	6544045
A02	10558761	10560310		A03	15568541	15569395		A03	6168810	6170950		A02	46287810	46290772		A02	6568189	6569040
A02	10592012	10595980		A03	15712870	15726410		A03	6173081	6175271		A02	46296735	46299167		A02	6680885	6681856
A02	10657738	10660537		A03	15789187	15796105		A03	6182751	6187248		A02	46331297	46332342		A02	6703706	6704559
A02	10676083	10677116		A03	15817892	15827357		A03	6222809	6225547		A02	46830725	46831835		A02	6707371	6709088
A02	10691157	10694082		A03	15841146	15855236		A03	6260440	6263937		A02	46936731	46939952		A02	6710189	6713061
A02	10721670	10725676		A03	16037466	16038361		A03	6346018	6358097		A02	47417719	47419007		A02	6725793	6727046
A02	10795114	10795660		A03	16180715	16183338		A03	6359206	6361391		A02	47440674	47447226		A02	6739718	6740595
A02	10872306	10873320		A03	16188585	16191296		A03	6503138	6508191		A02	47494824	47496352		A02	6785694	6786719
A02	10948467	10949735		A03	16312351	16317660		A03	6840542	6841771		A02	47561523	47562170		A02	6811664	6812681
A02	11048508	11049944		A03	16357880	16358480		A03	6882946	6889043		A02	47563319	47566432		A02	6831882	6834295
A02	11062172	11068128		A03	16374713	16376850		A03	6890353	6890792		A02	47785249	47787296		A02	6836601	6837815
A02	11082841	11084341		A03	16391310	16402589		A03	7045349	7046752		A02	47813685	47814532		A02	6841349	6841964
A02	11106761	11107794		A03	16633094	16633772		A03	7083167	7084569		A02	48400577	48401848		A02	6953591	6955285
A02	11171673	11174320		A03	16707322	16707946		A03	7140764	7142979		A02	48403861	48406096		A02	6966137	6966763
A02	11209968	11213543		A03	16727254	16727872		A03	7184799	7185748		A02	48427471	48428235		A02	6968888	6971945
A02	11215631	11217107		A03	16831180	16831854		A03	7209091	7209433		A02	48429167	48430300		A02	6984624	6985929
A02	11270952	11272643		A03	16845775	16846470		A03	7214410	7216166		A02	48431978	48433886		A02	6992047	6993060
A02	11278479	11282687		A03	16857950	16859736		A03	7311862	7314316		A02	48490547	48491284		A02	7005138	7005991
A02	11299465	11300880		A03	16937705	16938828		A03	7338305	7339474		A02	48714818	48715659		A02	7050048	7051403
A02	11308540	11311274		A03	16994543	16996489		A03	7341251	7344149		A02	49410306	49412765		A02	7156975	7157690
A02	11321198	11324694		A03	17145704	17146591		A03	7446074	7449450		A02	50256171	50257556		A02	7168440	7169300
A02	11399765	11402115		A03	17580142	17580954		A03	7458133	7461371		A02	53297438	53298273		A02	7192080	7194136
A02	11435730	11438390		A03	17678646	17680200		A03	7469903	7471588		A02	53791575	53793748		A02	7218614	7219678
A02	11451185	11452909		A03	17693738	17695036		A03	7508687	7510502		A02	54591579	54594479		A02	7222057	7222586
A02	11649168	11649664		A03	17743498	17744681		A03	7523127	7526751		A02	54603888	54604909		A02	7239519	7240588
A02	11652139	11659751		A03	17909553	17910201		A03	7558614	7559474		A02	54818378	54819204		A02	7260573	7263093
A02	11687646	11691633		A03	18025679	18026401		A03	7588304	7594613		A02	55226225	55226942		A02	7291501	7292834
A02	11693425	11696196		A03	18051122	18052058		A03	7679094	7682375		A02	55278632	55279719		A02	7297150	7298166
A02	11708311	11709664		A03	18095571	18096239		A03	7684753	7685348		A02	55359527	55360072		A02	7316906	7318526
A02	11728350	11729603		A03	18128495	18129147		A03	7697949	7707323		A02	55875805	55877067		A02	7337866	7339354
A02	11775725	11776755		A03	18153472	18154059		A03	7719486	7720024		A02	56106876	56111805		A02	7351635	7354404
A02	11911626	11916274		A03	18244894	18245743		A03	7780905	7784224		A02	56148935	56154250		A02	7443901	7445462
A02	11925881	11928838		A03	18285568	18286394		A03	7797867	7804770		A02	56262239	56263507		A02	7516824	7518625
A02	11939666	11942174		A03	18480201	18481049		A03	7830628	7833083		A02	56515729	56517744		A02	7532266	7535016
A02	12035758	12039612		A03	18486431	18487328		A03	7855577	7856278		A02	56524293	56525078		A02	7550310	7551004
A02	12097315	12098573		A03	18497484	18498121		A03	8029726	8031564		A02	56535147	56536421		A02	7554016	7555196
A02	12120646	12123869		A03	18628744	18630627		A03	8032660	8040214		A02	56571339	56572960		A02	7580759	7581773
A02	12125169	12127994		A03	18636295	18637061		A03	8057682	8060210		A02	56578607	56581301		A02	7588756	7589704
A02	12171006	12175891		A03	18669886	18671462		A03	8088746	8093062		A02	56649627	56650904		A02	7622520	7623795
A02	12240142	12241545		A03	18886529	18887319		A03	8094160	8095581		A02	56764448	56765595		A02	7633507	7634267
A02	12242863	12243583		A03	18891682	18901942		A03	8122163	8124544		A02	57967368	57968216		A02	7649806	7652449
A02	12252784	12256987		A03	19003530	19004787		A03	8149526	8151014		A02	58054003	58054710		A02	7715497	7715943
A02	12300307	12302457		A03	19100616	19101275		A03	8163915	8164671		A02	58491185	58492047		A02	7755200	7756849
A02	12450399	12451757		A03	19103170	19103837		A03	8168373	8169774		A02	58497466	58501171		A02	7761448	7765181
A02	12502912	12506535		A03	19197215	19201008		A03	8207603	8209442		A02	59204078	59205340		A02	7767310	7768282
A02	12628373	12631205		A03	19356519	19357309		A03	8236711	8237961		A02	60052612	60055656		A02	7788630	7790193
A02	12964236	12964846		A03	19518767	19526091		A03	8269164	8273531		A02	60834058	60835092		A02	7853016	7856471
A02	13059355	13060463		A03	20188432	20189108		A03	8278171	8280882		A02	61008468	61009172		A02	7864003	7864855
A02	13062698	13071523		A03	20350937	20351546		A03	8328695	8333601		A02	61172608	61174427		A02	7866562	7867404
A02	13077147	13077917		A03	20370686	20371288		A03	8361071	8364019		A02	61866950	61867684		A02	7935458	7937960
A02	13078989	13080636		A03	21641108	21643664		A03	8663135	8667061		A02	62318496	62319324		A02	7943886	7944497
A02	13212852	13215828		A03	21645359	21649502		A03	8678679	8679815		A02	63041065	63041997		A02	7980416	7982473
A02	13239615	13240956		A03	21956044	21956784		A03	8707802	8714535		A02	63163193	63164457		A02	7985282	7987795
A02	13282189	13286695		A03	22071118	22072030		A03	8731990	8733674		A02	63657641	63658838		A02	8011207	8013068
A02	13671719	13674463		A03	22164204	22165093		A03	8756228	8758776		A02	63696140	63696799		A02	8014618	8016073
[truncated: 45,767 more rows]
