# Supplementary material for: Histone Maps in Gossypium darwinii Reveal Epigenetic Regulation Drives Subgenome Divergence and Cotton Domestication
Source: Int J Mol Sci. 2023 Jun 25;24(13):10607. doi: 10.3390/ijms241310607 (PMC10341804; doi:10.3390/ijms241310607)
Supplement: Supplementary file 1 [file ijms-24-10607-s001.zip › Supplementary Table 3.xlsx]

## Sheet: Sheet1
Supplemental Table 3. Five clusters of genes marked by distinct combinatorial patterns of histone modifications.
Gene	Cluster
A01G000200v1	C5
A01G001600v1	C5
A01G001700v1	C5
A01G001900v1	C1
A01G002100v1	C3
A01G002200v1	C3
A01G002300v1	C2
A01G002500v1	C3
A01G002600v1	C3
A01G002800v1	C5
A01G002900v1	C4
A01G003000v1	C4
A01G003100v1	C3
A01G003200v1	C3
A01G003300v1	C5
A01G003400v1	C5
A01G003800v1	C3
A01G003900v1	C3
A01G004000v1	C3
A01G004100v1	C5
A01G004300v1	C3
A01G004400v1	C2
A01G004600v1	C1
A01G004700v1	C1
A01G004800v1	C1
A01G004900v1	C3
A01G005000v1	C4
A01G005200v1	C3
A01G005400v1	C1
A01G005500v1	C3
A01G005800v1	C3
A01G005900v1	C2
A01G006200v1	C3
A01G006300v1	C3
A01G006500v1	C1
A01G006700v1	C1
A01G006800v1	C3
A01G006900v1	C4
A01G007000v1	C3
A01G007400v1	C3
A01G007700v1	C4
A01G007900v1	C3
A01G008100v1	C2
A01G008200v1	C3
A01G008300v1	C3
A01G008400v1	C4
A01G008500v1	C4
A01G008600v1	C3
A01G008700v1	C4
A01G009000v1	C1
A01G009100v1	C2
A01G009200v1	C2
A01G009500v1	C5
A01G009600v1	C1
A01G009700v1	C5
A01G009800v1	C3
A01G009900v1	C3
A01G010000v1	C2
A01G010100v1	C2
A01G010200v1	C5
A01G010300v1	C2
A01G010400v1	C5
A01G010500v1	C2
A01G010600v1	C3
A01G010700v1	C5
A01G010800v1	C3
A01G011000v1	C3
A01G011100v1	C5
A01G011200v1	C2
A01G011300v1	C3
A01G011400v1	C3
A01G011500v1	C3
A01G011900v1	C4
A01G012400v1	C2
A01G012500v1	C2
A01G012600v1	C5
A01G012700v1	C3
A01G012800v1	C1
A01G012900v1	C1
A01G013000v1	C5
A01G013100v1	C5
A01G013300v1	C3
A01G013400v1	C3
A01G013500v1	C2
A01G013700v1	C3
A01G013900v1	C2
A01G014000v1	C3
A01G014500v1	C1
A01G015000v1	C2
A01G015100v1	C1
A01G015200v1	C1
A01G016900v1	C4
A01G017100v1	C3
A01G017200v1	C3
A01G017300v1	C3
A01G017400v1	C3
A01G017500v1	C3
A01G017600v1	C3
A01G018300v1	C3
A01G018400v1	C2
A01G018500v1	C3
A01G018900v1	C3
A01G019100v1	C3
A01G019200v1	C2
A01G019300v1	C5
A01G019500v1	C3
A01G019700v1	C5
A01G019800v1	C5
A01G019900v1	C1
A01G020000v1	C1
A01G020200v1	C1
A01G020300v1	C5
A01G020400v1	C3
A01G020500v1	C2
A01G020800v1	C1
A01G020900v1	C5
A01G021000v1	C3
A01G021100v1	C1
A01G021300v1	C4
A01G021600v1	C5
A01G022100v1	C4
A01G022200v1	C4
A01G022300v1	C2
A01G022500v1	C5
A01G022600v1	C2
A01G022800v1	C1
A01G023100v1	C1
A01G023200v1	C1
A01G023300v1	C2
A01G023400v1	C3
A01G023500v1	C5
A01G023600v1	C5
A01G023700v1	C3
A01G023800v1	C4
A01G023900v1	C2
A01G024000v1	C4
A01G024100v1	C3
A01G024200v1	C3
A01G024300v1	C2
A01G024400v1	C3
A01G024500v1	C3
A01G024600v1	C3
A01G024700v1	C2
A01G024800v1	C3
A01G025000v1	C1
A01G025100v1	C5
A01G025500v1	C5
A01G025600v1	C2
A01G025700v1	C1
A01G025800v1	C5
A01G025900v1	C2
A01G026000v1	C2
A01G026100v1	C3
A01G026200v1	C2
A01G026500v1	C3
A01G026600v1	C3
A01G026700v1	C3
A01G026800v1	C3
A01G027000v1	C3
A01G027100v1	C3
A01G027200v1	C3
A01G027300v1	C3
A01G027400v1	C1
A01G027500v1	C3
A01G028100v1	C3
A01G028200v1	C3
A01G028300v1	C1
A01G028400v1	C5
A01G028600v1	C1
A01G028700v1	C3
A01G028900v1	C2
A01G029100v1	C1
A01G029300v1	C2
A01G029500v1	C5
A01G029600v1	C5
A01G029700v1	C3
A01G030000v1	C5
A01G030100v1	C2
A01G030200v1	C3
A01G030300v1	C3
A01G030400v1	C2
A01G030500v1	C2
A01G030600v1	C2
A01G030700v1	C2
A01G030800v1	C2
A01G030900v1	C2
A01G031000v1	C2
A01G031100v1	C3
A01G031200v1	C2
A01G031400v1	C3
A01G031500v1	C5
A01G031600v1	C2
A01G031700v1	C3
A01G031800v1	C2
A01G031900v1	C5
A01G032000v1	C3
A01G032100v1	C3
A01G032200v1	C2
A01G032300v1	C5
A01G032400v1	C3
A01G032500v1	C2
A01G032600v1	C3
A01G032700v1	C2
A01G032800v1	C5
A01G033000v1	C5
A01G033100v1	C2
A01G033200v1	C5
A01G033300v1	C2
A01G033400v1	C1
A01G033500v1	C1
A01G033700v1	C3
A01G033800v1	C3
A01G033900v1	C3
A01G034000v1	C3
A01G034100v1	C5
A01G034500v1	C2
A01G034600v1	C3
A01G034700v1	C5
A01G034800v1	C3
A01G034900v1	C3
A01G035100v1	C3
A01G035200v1	C1
A01G035400v1	C3
A01G035500v1	C4
A01G035600v1	C4
A01G035800v1	C1
A01G035900v1	C4
A01G036000v1	C5
A01G036200v1	C1
A01G036300v1	C1
A01G036400v1	C4
A01G036600v1	C1
A01G036700v1	C1
A01G036800v1	C1
A01G036900v1	C1
A01G037000v1	C3
A01G037100v1	C3
A01G037300v1	C3
A01G037500v1	C3
A01G037600v1	C3
A01G037800v1	C3
A01G038000v1	C5
A01G038100v1	C3
A01G038300v1	C3
A01G038700v1	C1
A01G038900v1	C3
A01G039500v1	C4
A01G039800v1	C2
A01G039900v1	C5
A01G040000v1	C5
A01G040100v1	C5
A01G040200v1	C5
A01G040400v1	C3
A01G040500v1	C3
A01G040700v1	C1
A01G040900v1	C2
A01G041000v1	C2
A01G041100v1	C4
A01G041200v1	C4
A01G041500v1	C5
A01G042000v1	C1
A01G042100v1	C1
A01G042200v1	C1
A01G043300v1	C1
A01G043400v1	C1
A01G043600v1	C1
A01G043700v1	C5
A01G044100v1	C5
A01G044400v1	C3
A01G044500v1	C2
A01G044700v1	C1
A01G045100v1	C4
A01G045200v1	C2
A01G046000v1	C4
A01G046200v1	C1
A01G046400v1	C5
A01G046600v1	C4
A01G047100v1	C2
A01G047200v1	C5
A01G047300v1	C4
A01G047400v1	C3
A01G047700v1	C1
A01G047800v1	C2
A01G048000v1	C3
A01G048200v1	C2
A01G048300v1	C3
A01G048400v1	C3
A01G048500v1	C1
A01G048900v1	C1
A01G049000v1	C1
A01G049300v1	C3
A01G049400v1	C3
A01G049800v1	C1
A01G050100v1	C5
A01G050200v1	C3
A01G050300v1	C5
A01G050400v1	C1
A01G050500v1	C5
A01G050800v1	C1
A01G050900v1	C1
A01G051100v1	C2
A01G051200v1	C1
A01G051800v1	C1
A01G052600v1	C3
A01G053200v1	C5
A01G053300v1	C3
A01G053400v1	C5
A01G053500v1	C1
A01G053600v1	C1
A01G053700v1	C1
A01G053900v1	C3
A01G054100v1	C3
A01G054300v1	C5
A01G054400v1	C5
A01G054700v1	C2
A01G055300v1	C5
A01G055500v1	C5
A01G055600v1	C4
A01G055700v1	C5
A01G056100v1	C4
A01G056200v1	C5
A01G056400v1	C3
A01G056500v1	C3
A01G056700v1	C4
A01G057000v1	C2
A01G057100v1	C3
A01G057400v1	C2
A01G057500v1	C2
A01G057700v1	C3
A01G057800v1	C3
A01G057900v1	C3
A01G058000v1	C3
A01G058100v1	C3
A01G058200v1	C1
A01G058300v1	C1
A01G059400v1	C1
A01G059500v1	C3
A01G059600v1	C1
A01G059700v1	C5
A01G059800v1	C5
A01G060000v1	C5
A01G060200v1	C3
A01G060500v1	C3
A01G060600v1	C2
A01G060700v1	C4
A01G060900v1	C2
A01G061000v1	C1
A01G061100v1	C1
A01G061200v1	C4
A01G061300v1	C2
A01G061800v1	C3
A01G062000v1	C5
A01G062100v1	C4
A01G062200v1	C2
A01G062300v1	C3
A01G062400v1	C3
A01G062900v1	C4
A01G063300v1	C3
A01G063400v1	C5
A01G063500v1	C5
A01G063700v1	C1
A01G063900v1	C3
A01G064000v1	C4
A01G064100v1	C2
A01G064200v1	C3
A01G064300v1	C5
A01G064400v1	C5
A01G064500v1	C5
A01G064700v1	C4
A01G064800v1	C3
A01G065100v1	C3
A01G065200v1	C3
A01G065300v1	C5
A01G065400v1	C2
A01G065500v1	C3
A01G065600v1	C4
A01G065700v1	C4
A01G065800v1	C5
A01G065900v1	C3
A01G066100v1	C3
A01G066300v1	C4
A01G066400v1	C1
A01G066500v1	C5
A01G066600v1	C3
A01G066700v1	C3
A01G066800v1	C3
A01G066900v1	C2
A01G067200v1	C4
A01G067300v1	C1
A01G067400v1	C5
A01G067500v1	C5
A01G067600v1	C4
A01G067700v1	C1
A01G067900v1	C1
A01G068000v1	C5
A01G068400v1	C4
A01G068500v1	C3
A01G068600v1	C5
A01G068700v1	C2
A01G068800v1	C5
A01G069100v1	C2
A01G069200v1	C4
A01G069300v1	C1
A01G069500v1	C3
A01G069600v1	C4
A01G069900v1	C4
A01G070300v1	C2
A01G071000v1	C5
A01G071100v1	C1
A01G071200v1	C2
A01G071300v1	C3
A01G071400v1	C1
A01G071600v1	C4
A01G071700v1	C3
A01G072100v1	C4
A01G072200v1	C4
A01G072300v1	C2
A01G072400v1	C2
A01G072600v1	C2
A01G072700v1	C3
A01G072800v1	C2
A01G072900v1	C5
A01G073200v1	C5
A01G073300v1	C5
A01G073400v1	C1
A01G073900v1	C3
A01G074000v1	C5
A01G074700v1	C2
A01G074900v1	C3
A01G075000v1	C4
A01G075500v1	C3
A01G075600v1	C2
A01G075800v1	C1
A01G075900v1	C5
A01G076100v1	C3
A01G076300v1	C3
A01G076400v1	C3
A01G076700v1	C5
A01G076800v1	C2
A01G077000v1	C1
A01G077200v1	C1
A01G077400v1	C2
A01G077500v1	C1
A01G077600v1	C5
A01G077700v1	C5
A01G077800v1	C1
A01G077900v1	C4
A01G078000v1	C4
A01G078400v1	C4
A01G078500v1	C4
A01G078700v1	C4
A01G078800v1	C5
A01G078900v1	C5
A01G079100v1	C4
A01G079300v1	C5
A01G079400v1	C2
A01G079600v1	C1
A01G079800v1	C3
A01G079900v1	C4
A01G080000v1	C4
A01G080100v1	C5
A01G080200v1	C1
A01G080400v1	C4
A01G080500v1	C4
A01G080600v1	C5
A01G080700v1	C1
A01G081300v1	C3
A01G081400v1	C2
A01G081500v1	C3
A01G081700v1	C5
A01G082100v1	C5
A01G082300v1	C2
A01G082500v1	C1
A01G082600v1	C3
A01G082700v1	C3
A01G082800v1	C4
A01G083100v1	C2
A01G083200v1	C5
A01G083500v1	C2
A01G083600v1	C3
A01G083700v1	C2
A01G083900v1	C5
A01G084000v1	C5
A01G084100v1	C2
A01G084300v1	C3
A01G084400v1	C1
A01G084600v1	C4
A01G084800v1	C4
A01G084900v1	C3
A01G085000v1	C1
A01G085200v1	C1
A01G085500v1	C1
A01G085600v1	C4
A01G085900v1	C5
A01G086000v1	C3
A01G086100v1	C2
A01G086200v1	C2
A01G086300v1	C2
A01G086500v1	C1
A01G086600v1	C1
A01G086900v1	C1
A01G087000v1	C5
A01G087200v1	C3
A01G087300v1	C3
A01G087400v1	C4
A01G087500v1	C5
A01G087700v1	C2
A01G087800v1	C3
A01G087900v1	C5
A01G088000v1	C3
A01G088200v1	C2
A01G088300v1	C3
A01G088600v1	C5
A01G088700v1	C3
A01G088800v1	C2
A01G088900v1	C1
A01G089000v1	C2
A01G089100v1	C5
A01G089200v1	C3
A01G089300v1	C3
A01G089400v1	C2
A01G089800v1	C4
A01G089900v1	C3
A01G090100v1	C1
A01G090200v1	C2
A01G090500v1	C3
A01G090600v1	C5
A01G090900v1	C3
A01G091000v1	C4
A01G091200v1	C5
A01G091300v1	C1
A01G091400v1	C3
A01G091600v1	C1
A01G091900v1	C5
A01G092000v1	C5
A01G092100v1	C1
A01G092200v1	C4
A01G092300v1	C5
A01G092400v1	C2
A01G092500v1	C1
A01G092600v1	C1
A01G092700v1	C1
A01G092800v1	C5
A01G093000v1	C3
A01G093300v1	C5
A01G093400v1	C5
A01G093500v1	C3
A01G093600v1	C4
A01G093700v1	C3
A01G093800v1	C2
A01G094000v1	C1
A01G094100v1	C3
A01G094300v1	C5
A01G094400v1	C3
A01G094500v1	C3
A01G094600v1	C4
A01G094800v1	C3
A01G094900v1	C4
A01G095000v1	C3
A01G095100v1	C2
A01G095300v1	C5
A01G095500v1	C5
A01G095600v1	C5
A01G095700v1	C5
A01G095800v1	C2
A01G096000v1	C1
A01G096100v1	C2
A01G096200v1	C2
A01G096300v1	C4
A01G096400v1	C5
A01G096500v1	C2
A01G096700v1	C3
A01G097200v1	C3
A01G097300v1	C4
A01G097400v1	C3
A01G097500v1	C3
A01G097700v1	C3
A01G097800v1	C5
A01G098100v1	C4
A01G098600v1	C2
A01G098900v1	C2
A01G099000v1	C5
A01G099100v1	C2
A01G099300v1	C5
A01G099400v1	C5
A01G099500v1	C5
A01G099700v1	C4
A01G099800v1	C5
A01G099900v1	C4
A01G100000v1	C5
A01G100100v1	C2
A01G100600v1	C4
A01G100700v1	C3
A01G100800v1	C3
A01G100900v1	C5
A01G101000v1	C3
A01G101100v1	C3
A01G101400v1	C4
A01G101500v1	C4
A01G101600v1	C2
A01G101700v1	C3
A01G101800v1	C3
A01G101900v1	C2
A01G102000v1	C5
A01G102100v1	C2
A01G102200v1	C3
A01G102300v1	C3
A01G102400v1	C3
A01G102600v1	C5
A01G103200v1	C4
A01G103300v1	C5
A01G103500v1	C3
A01G103600v1	C2
A01G103700v1	C2
A01G103800v1	C5
A01G103900v1	C5
A01G104000v1	C1
A01G104200v1	C4
A01G104300v1	C2
A01G104400v1	C3
A01G104500v1	C1
A01G104900v1	C2
A01G105000v1	C3
A01G105100v1	C4
A01G105300v1	C1
A01G105600v1	C3
A01G105700v1	C3
A01G105800v1	C1
A01G105900v1	C5
A01G106200v1	C1
A01G106500v1	C3
A01G106700v1	C5
A01G106800v1	C4
A01G106900v1	C3
A01G107300v1	C4
A01G107400v1	C4
A01G107500v1	C3
A01G107600v1	C4
A01G107700v1	C1
A01G107800v1	C3
A01G107900v1	C5
A01G108300v1	C1
A01G108600v1	C1
A01G108800v1	C1
A01G108900v1	C1
A01G109100v1	C3
A01G109200v1	C5
A01G109300v1	C3
A01G109600v1	C5
A01G109800v1	C3
A01G109900v1	C3
A01G110100v1	C5
A01G110300v1	C3
A01G110500v1	C4
A01G110600v1	C1
A01G110700v1	C3
A01G110800v1	C4
A01G110900v1	C4
A01G111000v1	C3
A01G111100v1	C3
A01G111200v1	C2
A01G111300v1	C5
A01G111400v1	C3
A01G111500v1	C2
A01G111600v1	C3
A01G111700v1	C4
A01G111800v1	C4
A01G111900v1	C4
A01G112000v1	C3
A01G112100v1	C3
A01G112200v1	C3
A01G112300v1	C3
A01G112600v1	C2
A01G112700v1	C2
A01G112800v1	C2
A01G112900v1	C1
A01G113000v1	C5
A01G113100v1	C2
A01G113200v1	C5
A01G113300v1	C3
A01G113400v1	C2
A01G113500v1	C1
A01G113600v1	C5
A01G113800v1	C2
A01G114000v1	C3
A01G114100v1	C3
A01G114200v1	C2
A01G114300v1	C3
A01G114400v1	C3
A01G114500v1	C3
A01G114600v1	C3
A01G114700v1	C4
A01G114800v1	C5
A01G114900v1	C5
A01G115000v1	C5
A01G115500v1	C4
A01G115600v1	C1
A01G115800v1	C5
A01G116000v1	C3
A01G116100v1	C5
A01G116200v1	C4
A01G116300v1	C1
A01G116400v1	C3
A01G116500v1	C5
A01G116600v1	C3
A01G116700v1	C3
A01G116800v1	C3
A01G116900v1	C3
A01G117000v1	C3
A01G117400v1	C3
A01G117500v1	C2
A01G117600v1	C3
A01G117800v1	C3
A01G117900v1	C4
A01G118000v1	C1
A01G118200v1	C4
A01G118300v1	C2
A01G118600v1	C5
A01G118700v1	C1
A01G118800v1	C5
A01G118900v1	C1
A01G119000v1	C4
A01G119200v1	C2
A01G119300v1	C3
A01G119400v1	C4
A01G119500v1	C2
A01G119600v1	C4
A01G119700v1	C2
A01G120000v1	C5
A01G120100v1	C5
A01G120200v1	C2
A01G120300v1	C3
A01G120400v1	C5
A01G120500v1	C5
A01G120600v1	C3
A01G120700v1	C3
A01G120900v1	C3
A01G121100v1	C5
A01G121400v1	C3
A01G121600v1	C5
A01G121700v1	C4
A01G121800v1	C3
A01G121900v1	C1
A01G122100v1	C4
A01G122200v1	C1
A01G122400v1	C5
A01G122700v1	C5
A01G122800v1	C2
A01G122900v1	C1
A01G123000v1	C4
A01G123100v1	C4
A01G123300v1	C3
A01G123400v1	C5
A01G123600v1	C5
A01G123700v1	C2
A01G123900v1	C2
A01G124100v1	C2
A01G124200v1	C2
A01G124800v1	C2
A01G124900v1	C2
A01G125000v1	C3
A01G125100v1	C2
A01G125200v1	C3
A01G125300v1	C2
A01G125400v1	C5
A01G125500v1	C5
A01G125600v1	C5
A01G125700v1	C3
A01G125800v1	C1
A01G126000v1	C1
A01G126100v1	C3
A01G126200v1	C3
A01G126400v1	C1
A01G126500v1	C3
A01G126600v1	C2
A01G126700v1	C2
A01G126800v1	C5
A01G126900v1	C1
A01G127000v1	C3
A01G127100v1	C4
A01G127300v1	C2
A01G127400v1	C4
A01G127500v1	C2
A01G127600v1	C2
A01G127700v1	C4
A01G127800v1	C4
A01G127900v1	C2
A01G128000v1	C1
A01G128200v1	C5
A01G128300v1	C5
A01G128500v1	C2
A01G128600v1	C2
A01G128700v1	C2
A01G128800v1	C2
A01G128900v1	C4
A01G129000v1	C3
A01G129100v1	C3
A01G129200v1	C3
A01G129400v1	C3
A01G129500v1	C3
A01G129600v1	C2
A01G129700v1	C3
A01G129800v1	C1
A01G130000v1	C3
A01G130100v1	C5
A01G130200v1	C3
A01G130300v1	C2
A01G130500v1	C5
A01G130700v1	C5
A01G130800v1	C3
A01G130900v1	C5
A01G131000v1	C1
A01G131200v1	C2
A01G131300v1	C4
A01G131400v1	C5
A01G131500v1	C5
A01G131600v1	C4
A01G131800v1	C1
A01G131900v1	C3
A01G132000v1	C5
A01G132100v1	C3
A01G132200v1	C3
A01G132300v1	C2
A01G132400v1	C2
A01G132500v1	C5
A01G132800v1	C2
A01G132900v1	C5
A01G133000v1	C2
A01G133200v1	C4
A01G133700v1	C2
A01G133800v1	C3
A01G133900v1	C4
A01G134200v1	C2
A01G134500v1	C5
A01G134600v1	C5
A01G134700v1	C1
A01G134900v1	C3
A01G135000v1	C1
A01G135200v1	C1
A01G135500v1	C3
A01G135600v1	C1
A01G135800v1	C1
A01G135900v1	C3
A01G136100v1	C2
A01G136300v1	C2
A01G136400v1	C4
A01G136700v1	C5
A01G136800v1	C4
A01G136900v1	C4
A01G137100v1	C1
A01G137300v1	C2
A01G137400v1	C3
A01G137500v1	C3
A01G137600v1	C4
A01G137700v1	C4
A01G137800v1	C5
A01G137900v1	C1
A01G138000v1	C3
A01G138100v1	C5
A01G138200v1	C3
A01G138400v1	C3
A01G138500v1	C4
A01G138600v1	C5
A01G138700v1	C5
A01G138800v1	C1
A01G138900v1	C3
A01G139100v1	C3
A01G139200v1	C3
A01G139300v1	C3
A01G139500v1	C5
A01G139600v1	C3
A01G139700v1	C4
A01G140100v1	C4
A01G140200v1	C4
A01G140300v1	C5
A01G140500v1	C5
A01G140600v1	C2
A01G140700v1	C3
A01G140900v1	C2
A01G141200v1	C3
A01G141300v1	C3
A01G141400v1	C2
A01G141500v1	C2
A01G141600v1	C3
A01G141800v1	C1
A01G141900v1	C4
A01G142100v1	C3
A01G142200v1	C3
A01G142300v1	C3
A01G142400v1	C3
A01G142500v1	C5
A01G142600v1	C3
A01G142700v1	C3
A01G142800v1	C5
A01G142900v1	C1
A01G143200v1	C2
A01G143300v1	C5
A01G143600v1	C3
A01G143800v1	C3
A01G143900v1	C3
A01G144100v1	C3
A01G144200v1	C3
A01G144400v1	C2
A01G144700v1	C5
A01G144900v1	C3
A01G145000v1	C3
A01G145300v1	C5
A01G145400v1	C5
A01G145500v1	C3
A01G145800v1	C3
A01G145900v1	C3
A01G146000v1	C3
A01G146100v1	C3
A01G146400v1	C3
A01G146600v1	C3
A01G146700v1	C3
A01G146800v1	C3
A01G146900v1	C1
A01G147000v1	C2
A01G147100v1	C3
A01G147200v1	C2
A01G147400v1	C3
A01G147500v1	C3
A01G147600v1	C3
A01G147700v1	C3
A01G147900v1	C5
A01G148000v1	C3
A01G148100v1	C2
A01G148200v1	C2
A01G148300v1	C5
A01G148400v1	C3
A01G148500v1	C3
A01G148700v1	C3
A01G148900v1	C3
A01G149000v1	C3
A01G149100v1	C3
A01G149200v1	C2
A01G149600v1	C3
A01G149700v1	C2
A01G149800v1	C2
A01G149900v1	C1
A01G150000v1	C1
A01G150200v1	C5
A01G150400v1	C5
A01G150500v1	C5
A01G150600v1	C5
A01G150700v1	C5
A01G150900v1	C2
A01G151000v1	C1
A01G151100v1	C5
A01G151200v1	C3
A01G151400v1	C4
A01G151500v1	C5
A01G151600v1	C3
A01G151700v1	C5
A01G151900v1	C3
A01G152000v1	C2
A01G152100v1	C5
A01G152200v1	C4
A01G152600v1	C2
A01G153100v1	C3
A01G153200v1	C2
A01G153300v1	C3
A01G153400v1	C3
A01G153500v1	C5
A01G153600v1	C2
A01G153900v1	C4
A01G154000v1	C3
A01G154100v1	C2
A01G154200v1	C3
A01G154300v1	C1
A01G154400v1	C1
A01G154500v1	C1
A01G154600v1	C5
A01G154700v1	C5
A01G154800v1	C3
A01G154900v1	C2
A01G155000v1	C1
A01G155100v1	C3
A01G155200v1	C5
A01G155500v1	C1
A01G155700v1	C3
A01G155900v1	C3
A01G156000v1	C3
A01G156100v1	C3
A01G156200v1	C3
A01G156300v1	C5
A01G156400v1	C2
A01G156500v1	C3
A01G156600v1	C1
A01G156800v1	C1
A01G156900v1	C3
A01G157100v1	C3
A01G157300v1	C4
A01G157400v1	C2
A01G157800v1	C1
A01G157900v1	C3
A01G158000v1	C5
A01G158200v1	C2
A01G158400v1	C3
A01G159700v1	C3
A01G160000v1	C3
A01G160100v1	C3
A01G160200v1	C3
A01G160500v1	C3
A01G160700v1	C4
A01G160800v1	C3
A01G161000v1	C3
A01G161100v1	C3
A01G161200v1	C3
A01G161300v1	C2
A01G161400v1	C5
A01G161500v1	C2
A01G161600v1	C3
A01G161900v1	C2
A01G162200v1	C4
A01G162300v1	C3
A01G162400v1	C3
A01G162600v1	C5
A01G162800v1	C3
A01G163100v1	C5
A01G163200v1	C4
A01G163400v1	C3
A01G163500v1	C4
A01G163600v1	C5
A01G163700v1	C4
A01G163900v1	C4
A01G164000v1	C5
A01G164100v1	C2
A01G164200v1	C1
A01G164500v1	C4
A01G164600v1	C4
A01G164700v1	C4
A01G164800v1	C3
A01G164900v1	C3
A01G165000v1	C1
A01G165100v1	C1
A01G165200v1	C4
A01G165300v1	C3
A01G165600v1	C1
A01G165700v1	C3
A01G165800v1	C1
A01G165900v1	C5
A01G166000v1	C3
A01G166100v1	C1
A01G166600v1	C2
A01G166700v1	C3
A01G166900v1	C3
A01G167000v1	C3
A01G167100v1	C1
A01G167300v1	C5
A01G167400v1	C4
A01G167500v1	C5
A01G167600v1	C1
A01G167700v1	C2
A01G167900v1	C3
A01G168000v1	C5
A01G168100v1	C1
A01G168200v1	C2
A01G168500v1	C5
A01G168600v1	C3
A01G168700v1	C1
A01G168800v1	C1
A01G168900v1	C5
A01G169000v1	C5
A01G169100v1	C1
A01G169700v1	C1
A01G169800v1	C5
A01G170100v1	C5
A01G170400v1	C5
A01G170500v1	C3
A01G170700v1	C5
A01G170900v1	C2
A01G171000v1	C5
A01G171100v1	C2
A01G171200v1	C4
A01G171400v1	C2
A01G171700v1	C4
A01G172100v1	C5
A01G172200v1	C3
A01G172300v1	C3
A01G172400v1	C3
A01G172500v1	C3
A01G172600v1	C3
A01G172700v1	C3
A01G172900v1	C3
A01G173100v1	C3
A01G173200v1	C4
A01G173300v1	C3
A01G173400v1	C2
A01G173600v1	C3
A01G173700v1	C3
A01G173800v1	C2
A01G174000v1	C1
A01G174300v1	C5
A01G174400v1	C1
A01G174700v1	C3
A01G174900v1	C5
A01G175000v1	C5
A01G175200v1	C3
A01G175600v1	C5
A01G175700v1	C3
A01G175800v1	C3
A01G175900v1	C4
A01G176000v1	C1
A01G176300v1	C3
A01G176500v1	C3
A01G176600v1	C4
A01G176700v1	C2
A01G176900v1	C3
A01G177100v1	C4
A01G177200v1	C4
A01G177300v1	C4
A01G177500v1	C2
A01G177600v1	C2
A01G177700v1	C2
A01G177800v1	C2
A01G178000v1	C3
A01G178100v1	C2
A01G178300v1	C5
A01G178500v1	C5
A01G178700v1	C3
A01G178800v1	C3
A01G178900v1	C3
A01G179000v1	C2
A01G179100v1	C5
A01G179200v1	C4
A01G179400v1	C3
A01G179500v1	C3
A01G179600v1	C2
A01G180200v1	C3
A01G180300v1	C2
A01G180400v1	C5
A01G180800v1	C1
A01G180900v1	C3
A01G181000v1	C3
A01G181100v1	C5
A01G181200v1	C4
A01G181500v1	C2
A01G181600v1	C4
A01G181700v1	C1
A01G181900v1	C2
A01G182000v1	C3
A01G182200v1	C2
A01G182300v1	C4
A01G182400v1	C5
A01G182500v1	C2
A01G182700v1	C5
A01G182800v1	C1
A01G182900v1	C4
A01G183000v1	C4
A01G183100v1	C5
A01G183200v1	C5
A01G183400v1	C3
A01G183500v1	C2
A01G183600v1	C2
A01G183700v1	C3
A01G183900v1	C3
A01G184000v1	C3
A01G184100v1	C4
A01G184200v1	C5
A01G184300v1	C1
A01G184600v1	C2
A01G184700v1	C2
A01G184800v1	C3
A01G184900v1	C5
A01G185100v1	C1
A01G185200v1	C3
A01G185300v1	C3
A01G185400v1	C2
A01G186000v1	C3
A01G186500v1	C3
A01G186600v1	C3
A01G186800v1	C4
A01G186900v1	C3
A01G187000v1	C5
A01G187100v1	C5
A01G187200v1	C1
A01G187400v1	C3
A01G187600v1	C1
A01G187700v1	C1
A01G188000v1	C3
A01G188200v1	C5
A01G188300v1	C3
A01G188400v1	C2
A01G188500v1	C4
A01G188700v1	C5
A01G189000v1	C1
A01G189100v1	C4
A01G189400v1	C5
A01G189600v1	C4
A01G190400v1	C3
A01G190600v1	C5
A01G190700v1	C4
A01G191300v1	C2
A01G191400v1	C5
A01G191500v1	C5
A01G191700v1	C1
A01G191900v1	C5
A01G192000v1	C5
A01G192100v1	C5
A01G192200v1	C4
A01G192500v1	C2
A01G192600v1	C3
A01G192800v1	C5
A01G192900v1	C5
A01G193000v1	C4
A01G193300v1	C5
A01G193400v1	C5
A01G193500v1	C3
A01G193800v1	C3
A01G193900v1	C2
A01G194200v1	C3
A01G194300v1	C3
A01G194500v1	C2
A01G194600v1	C2
A01G194700v1	C5
A01G194800v1	C1
A01G194900v1	C1
A01G195000v1	C2
A01G195100v1	C2
A01G195300v1	C3
A01G195500v1	C5
A01G195600v1	C2
A01G195700v1	C5
A01G195800v1	C3
A01G195900v1	C1
A01G196100v1	C3
A01G196200v1	C2
A01G196300v1	C3
A01G196400v1	C3
A01G196500v1	C3
A01G196600v1	C4
A01G196700v1	C3
A01G196800v1	C5
A01G196900v1	C1
A01G197000v1	C3
A01G197100v1	C3
A01G197300v1	C1
A01G197400v1	C2
A01G197500v1	C5
A01G197600v1	C4
A01G197700v1	C3
A01G197800v1	C5
A01G198000v1	C2
A01G198100v1	C5
A01G198200v1	C5
A01G198400v1	C5
A01G198700v1	C1
A01G199100v1	C5
A01G199300v1	C1
A01G199400v1	C5
A01G199800v1	C3
A01G200100v1	C2
A01G200200v1	C3
A01G200300v1	C3
A01G200500v1	C5
A01G200600v1	C4
A01G200700v1	C5
A01G200800v1	C4
A01G200900v1	C5
A01G201000v1	C4
A01G201200v1	C3
A01G201300v1	C3
A01G201400v1	C3
A01G201500v1	C5
A01G201600v1	C3
A01G201700v1	C3
A01G202100v1	C2
A01G202200v1	C3
A01G202300v1	C3
A01G202400v1	C5
A01G202500v1	C2
A01G202600v1	C2
A01G202700v1	C1
A01G202800v1	C3
A01G203100v1	C4
A01G203200v1	C1
A01G203300v1	C3
A01G203400v1	C3
A01G203600v1	C3
A01G203700v1	C3
A01G203900v1	C3
A01G204000v1	C2
A01G204100v1	C3
A01G204200v1	C5
A01G204400v1	C1
A01G204600v1	C5
A01G204700v1	C3
A01G205000v1	C2
A01G205100v1	C3
A01G205200v1	C5
A01G205500v1	C3
A01G206200v1	C1
A01G206500v1	C2
A01G206700v1	C3
A01G206800v1	C3
A01G206900v1	C1
A01G207000v1	C2
A01G207100v1	C2
A01G207200v1	C5
A01G207300v1	C4
A01G207600v1	C2
A01G207700v1	C2
A01G207800v1	C4
A01G208200v1	C1
A01G208300v1	C2
A01G208500v1	C5
A01G208700v1	C3
A01G208900v1	C5
A01G209100v1	C5
A01G209200v1	C4
A01G209300v1	C4
A01G209500v1	C3
A01G209600v1	C5
A01G209700v1	C2
A01G209800v1	C1
A01G209900v1	C5
A01G210000v1	C3
A01G210100v1	C4
A01G210200v1	C1
A01G210300v1	C2
A01G210400v1	C1
A01G210500v1	C3
A01G210600v1	C3
A01G210700v1	C3
A01G210800v1	C2
A01G210900v1	C1
A01G211200v1	C1
A01G211300v1	C3
A01G211400v1	C3
A01G211500v1	C2
A01G211600v1	C4
A01G211700v1	C5
A01G211900v1	C3
A01G212000v1	C4
A01G212100v1	C4
A01G212200v1	C5
A01G212300v1	C1
A01G212400v1	C3
A01G212500v1	C5
A01G212600v1	C2
A01G212700v1	C3
A01G212800v1	C4
A01G213000v1	C2
A01G213100v1	C5
A01G213200v1	C4
A01G213500v1	C3
A01G213600v1	C5
A01G213700v1	C3
A01G214000v1	C1
A01G214100v1	C3
A01G214200v1	C5
A01G214300v1	C3
A01G214400v1	C3
A01G214500v1	C1
A01G214800v1	C5
A01G214900v1	C5
A01G215100v1	C2
A01G215200v1	C3
A01G215400v1	C3
A01G215500v1	C3
A01G215600v1	C5
A01G215800v1	C1
A01G215900v1	C4
A01G216000v1	C1
A01G216100v1	C4
A01G216400v1	C2
A01G216500v1	C5
A01G216600v1	C2
A01G216900v1	C5
A01G217000v1	C2
A01G217200v1	C5
A01G217300v1	C2
A01G217400v1	C5
A01G217500v1	C2
A01G217600v1	C3
A01G217800v1	C3
A01G217900v1	C3
A01G218100v1	C5
A01G218200v1	C4
A01G218300v1	C4
A01G218500v1	C5
A01G218600v1	C1
A01G218700v1	C1
A01G218800v1	C5
A01G218900v1	C2
A01G219000v1	C1
A01G219100v1	C5
A01G219200v1	C2
A01G219300v1	C1
A01G219400v1	C2
A01G219500v1	C1
A01G219600v1	C5
A01G219700v1	C2
A01G219800v1	C4
A01G220300v1	C3
A01G220400v1	C5
A01G220500v1	C2
A01G220700v1	C2
A01G220800v1	C4
A01G221200v1	C3
A01G221300v1	C3
A01G221500v1	C2
A01G221600v1	C2
A01G221800v1	C5
A01G221900v1	C1
A01G222100v1	C3
A01G222200v1	C1
A01G222600v1	C5
A01G222700v1	C3
A01G222800v1	C4
A01G222900v1	C1
A01G223000v1	C1
A01G223100v1	C4
A01G223400v1	C3
A01G223500v1	C4
A01G223600v1	C1
A01G223700v1	C5
A01G223900v1	C3
A01G224000v1	C1
A01G224100v1	C5
A01G224200v1	C2
A01G224300v1	C1
A01G224400v1	C1
A01G224500v1	C1
A01G224600v1	C3
A01G224700v1	C5
A01G224800v1	C2
A01G224900v1	C3
A01G225100v1	C3
A01G225200v1	C3
A01G225400v1	C1
A01G225500v1	C4
A01G225600v1	C3
A01G225800v1	C3
A01G226000v1	C5
A01G226100v1	C3
A01G226200v1	C3
A01G226500v1	C3
A01G226600v1	C3
A01G226700v1	C3
A01G226800v1	C3
A01G226900v1	C4
A01G227000v1	C4
A01G227100v1	C3
A01G227200v1	C5
A01G227300v1	C5
A01G227400v1	C3
A01G227500v1	C4
A01G227600v1	C1
A01G227700v1	C3
A01G227800v1	C2
A01G227900v1	C3
A01G228000v1	C3
A01G228100v1	C3
A01G228400v1	C3
A01G228900v1	C3
A01G229000v1	C3
A01G229100v1	C1
A01G229200v1	C1
A01G229300v1	C5
A01G229400v1	C2
A01G229500v1	C2
A01G229600v1	C3
A01G229700v1	C3
A01G229800v1	C3
A01G229900v1	C2
A01G230000v1	C2
A01G230100v1	C1
A01G230700v1	C5
A01G230800v1	C4
A01G230900v1	C3
A01G231000v1	C5
A01G231200v1	C2
A01G231300v1	C1
A01G231600v1	C5
A01G231700v1	C5
A01G231800v1	C1
A01G231900v1	C5
A01G232000v1	C2
A01G232100v1	C5
A01G232300v1	C2
A01G232900v1	C4
A01G233800v1	C1
A01G233900v1	C5
A01G234000v1	C1
A01G234100v1	C5
A01G234200v1	C5
A01G234300v1	C5
A01G234400v1	C1
A01G234600v1	C2
A01G234700v1	C3
A01G234800v1	C1
A01G234900v1	C2
A01G235000v1	C5
A01G235200v1	C5
A01G235400v1	C3
A01G235600v1	C3
A01G235900v1	C5
A01G236000v1	C5
A01G236100v1	C3
A01G236200v1	C1
A01G236300v1	C5
A01G236400v1	C3
A01G236500v1	C3
A01G236700v1	C5
A01G236900v1	C2
A01G237000v1	C2
A01G237100v1	C4
A01G237200v1	C1
A01G237300v1	C5
A01G237600v1	C5
A01G237800v1	C2
A01G237900v1	C5
A01G238000v1	C3
A01G238100v1	C3
A01G238200v1	C2
A01G238500v1	C5
A01G238900v1	C1
A01G239000v1	C1
A01G239100v1	C1
A01G239200v1	C4
A01G239400v1	C1
A01G239600v1	C1
A01G239700v1	C3
A01G239800v1	C3
A01G240100v1	C3
A01G240300v1	C2
A01G240400v1	C5
A01G240500v1	C3
A01G240600v1	C2
A01G240700v1	C3
A01G240800v1	C3
A01G240900v1	C1
A01G241000v1	C1
A01G241100v1	C1
A01G241200v1	C5
A01G241300v1	C3
A01G241400v1	C5
A01G241600v1	C2
A01G241700v1	C2
A01G241800v1	C4
A01G242000v1	C3
A01G242200v1	C3
A01G242300v1	C3
A01G242400v1	C5
A01G242500v1	C3
A01G242600v1	C3
A01G242700v1	C3
A01G242800v1	C2
A01G242900v1	C1
A01G243000v1	C5
A01G243100v1	C5
A01G243200v1	C5
A01G243300v1	C5
A01G243400v1	C5
A01G243500v1	C5
A01G243600v1	C5
A01G243700v1	C2
A01G243800v1	C3
A01G244000v1	C2
A01G244100v1	C2
A01G244200v1	C3
A01G244600v1	C1
A01G244700v1	C1
A01G244900v1	C2
A01G245000v1	C3
A01G245400v1	C5
A01G245600v1	C5
A01G245700v1	C4
A01G245900v1	C2
A01G246000v1	C5
A01G246100v1	C3
A01G246200v1	C3
A01G246600v1	C5
A01G246800v1	C3
A01G247000v1	C5
A01G247200v1	C2
A01G247400v1	C4
A01G247500v1	C3
A01G247600v1	C2
A01G247800v1	C3
A01G247900v1	C5
A01G248400v1	C3
A01G248500v1	C3
A01G248600v1	C3
A01G248800v1	C3
A01G248900v1	C3
A01G249000v1	C5
A01G249100v1	C5
A01G249200v1	C2
A01G249500v1	C2
A01G249700v1	C1
A01G249800v1	C1
A01G249900v1	C2
A01G250000v1	C3
A01G250100v1	C5
A01G250300v1	C3
A01G250400v1	C2
A01G250500v1	C5
A01G250600v1	C2
A01G250900v1	C2
A01G251000v1	C3
A01G251100v1	C4
A01G251600v1	C3
A01G251700v1	C4
A01G251800v1	C5
A01G251900v1	C5
A01G252100v1	C3
A01G252200v1	C1
A01G252300v1	C4
A01G252400v1	C1
A01G252700v1	C3
A01G252800v1	C1
A01G253000v1	C1
A01G253300v1	C2
A01G253400v1	C3
A01G253500v1	C5
A01G253600v1	C3
A01G253700v1	C3
A01G253800v1	C1
A01G253900v1	C5
A01G254000v1	C5
A01G254100v1	C2
A01G254200v1	C3
A01G254300v1	C2
A01G254900v1	C2
A01G255000v1	C2
A01G255100v1	C5
A01G255200v1	C4
A01G255300v1	C3
A01G255500v1	C2
A01G255600v1	C4
A01G255700v1	C3
A01G255800v1	C2
A01G255900v1	C4
A01G256000v1	C4
A01G256200v1	C1
A01G256400v1	C3
A01G257100v1	C3
A01G257300v1	C3
A01G257400v1	C3
A01G257500v1	C3
A01G257600v1	C1
A01G257800v1	C5
A01G257900v1	C5
A01G258000v1	C1
A01G258100v1	C2
A01G258200v1	C3
A01G258400v1	C2
A01G258500v1	C3
A01G258600v1	C5
A01G258700v1	C2
A01G258800v1	C5
A01G259000v1	C3
A01G259100v1	C2
A01G259200v1	C3
A01G259400v1	C1
A01G259500v1	C3
A01G259600v1	C1
A01G259700v1	C3
A01G259800v1	C3
A01G259900v1	C3
A01G260000v1	C3
A01G260200v1	C3
A01G260400v1	C2
A01G260600v1	C2
A01G260700v1	C3
A01G261000v1	C5
A01G261200v1	C3
A01G261300v1	C2
A01G261400v1	C1
A01G261500v1	C1
A01G261600v1	C3
A01G261800v1	C2
A01G261900v1	C5
A01G262300v1	C3
A01G262400v1	C3
A01G262500v1	C3
A01G262600v1	C3
A01G262700v1	C3
A01G262800v1	C3
A01G262900v1	C2
A01G263100v1	C3
A01G263800v1	C3
A02G000100v1	C3
A02G000400v1	C2
A02G000500v1	C3
A02G000600v1	C1
A02G000700v1	C1
A02G000800v1	C3
A02G001100v1	C4
A02G001200v1	C2
A02G001300v1	C4
A02G001400v1	C2
A02G001500v1	C2
A02G001600v1	C4
A02G001700v1	C2
A02G001800v1	C3
A02G001900v1	C3
A02G002100v1	C4
A02G002400v1	C2
A02G002500v1	C3
A02G002600v1	C2
A02G002700v1	C2
A02G002800v1	C2
A02G002900v1	C5
A02G003100v1	C3
A02G003200v1	C1
A02G003300v1	C2
A02G003500v1	C5
A02G003700v1	C2
A02G003800v1	C5
A02G003900v1	C4
A02G004000v1	C4
A02G004100v1	C3
A02G004200v1	C3
A02G004300v1	C3
A02G004400v1	C3
A02G004500v1	C4
A02G004600v1	C5
A02G004800v1	C1
A02G005000v1	C5
A02G005100v1	C2
A02G005300v1	C2
A02G005400v1	C4
A02G005500v1	C1
A02G005700v1	C5
A02G005800v1	C3
A02G005900v1	C3
A02G006000v1	C5
A02G006400v1	C5
A02G006900v1	C1
A02G007000v1	C3
A02G007100v1	C3
A02G007200v1	C2
A02G007300v1	C5
A02G007400v1	C2
A02G007700v1	C2
A02G007800v1	C2
A02G008000v1	C5
A02G008100v1	C3
A02G008200v1	C2
A02G008500v1	C5
A02G008600v1	C3
A02G008700v1	C4
A02G008800v1	C3
A02G008900v1	C1
A02G009000v1	C1
A02G009100v1	C1
A02G009200v1	C3
A02G009400v1	C3
A02G009600v1	C3
A02G009700v1	C2
A02G010000v1	C4
A02G010100v1	C1
A02G010200v1	C1
A02G010300v1	C1
A02G010400v1	C1
A02G010500v1	C1
A02G010600v1	C1
A02G010700v1	C1
A02G010800v1	C1
A02G010900v1	C1
A02G011000v1	C4
A02G011400v1	C3
A02G011500v1	C2
A02G011700v1	C1
A02G011800v1	C3
A02G012000v1	C3
A02G012100v1	C3
A02G012300v1	C3
A02G012400v1	C3
A02G012700v1	C4
A02G012800v1	C1
A02G012900v1	C2
A02G013000v1	C3
A02G013200v1	C3
A02G013300v1	C3
A02G013400v1	C3
A02G013600v1	C3
A02G013800v1	C3
A02G014100v1	C5
A02G014200v1	C3
A02G014300v1	C3
A02G014400v1	C4
A02G014500v1	C1
A02G014600v1	C5
A02G014700v1	C3
A02G014800v1	C2
A02G015000v1	C5
A02G015100v1	C5
A02G015300v1	C3
A02G015400v1	C3
A02G015500v1	C3
A02G015600v1	C1
A02G015800v1	C3
A02G016000v1	C1
A02G016100v1	C3
A02G016700v1	C2
A02G017100v1	C5
A02G017200v1	C3
A02G017400v1	C4
A02G017600v1	C4
A02G017800v1	C3
A02G017900v1	C2
A02G018000v1	C3
A02G018100v1	C3
A02G018200v1	C3
A02G018400v1	C2
A02G018500v1	C3
A02G018700v1	C3
A02G018800v1	C1
A02G018900v1	C3
A02G019000v1	C5
A02G019200v1	C3
A02G019400v1	C1
A02G019800v1	C3
A02G019900v1	C5
A02G020000v1	C5
A02G020100v1	C1
A02G020200v1	C1
A02G020300v1	C3
A02G020600v1	C1
A02G020700v1	C4
A02G020800v1	C2
A02G021100v1	C3
A02G021500v1	C1
A02G021600v1	C1
A02G021800v1	C1
A02G022100v1	C3
A02G022200v1	C5
A02G022400v1	C1
A02G022500v1	C1
A02G022700v1	C1
A02G022900v1	C1
A02G023000v1	C3
A02G023200v1	C2
A02G023300v1	C1
A02G023600v1	C2
A02G023700v1	C2
A02G023900v1	C2
A02G024000v1	C4
A02G024200v1	C5
A02G024300v1	C1
A02G024400v1	C3
A02G024500v1	C5
A02G024600v1	C5
A02G024700v1	C3
A02G024800v1	C3
A02G024900v1	C3
A02G025000v1	C3
A02G025700v1	C1
A02G026100v1	C1
A02G026200v1	C1
A02G026300v1	C4
A02G026400v1	C5
A02G026800v1	C3
A02G026900v1	C3
A02G027000v1	C5
A02G027100v1	C2
A02G027200v1	C1
A02G027300v1	C3
A02G027400v1	C3
A02G027500v1	C1
A02G027600v1	C3
A02G027700v1	C3
A02G027800v1	C3
A02G027900v1	C3
A02G028200v1	C3
A02G028300v1	C1
A02G028400v1	C1
A02G028500v1	C1
A02G028900v1	C5
A02G030000v1	C2
A02G030300v1	C5
A02G030400v1	C3
A02G030600v1	C3
A02G031400v1	C3
A02G031600v1	C3
A02G031800v1	C3
A02G032000v1	C3
A02G032100v1	C3
A02G032200v1	C2
A02G032300v1	C5
A02G032500v1	C3
A02G032600v1	C3
A02G032700v1	C5
A02G032800v1	C5
A02G033000v1	C2
A02G033100v1	C3
A02G033200v1	C2
A02G033600v1	C5
A02G033700v1	C2
A02G033900v1	C5
A02G034100v1	C5
A02G034300v1	C5
A02G034400v1	C5
A02G034500v1	C5
A02G034600v1	C5
A02G034700v1	C5
A02G034800v1	C1
A02G034900v1	C2
A02G035000v1	C3
A02G035300v1	C4
A02G035400v1	C1
A02G035500v1	C4
A02G035700v1	C4
A02G035800v1	C4
A02G036000v1	C4
A02G036100v1	C5
A02G036200v1	C3
A02G036500v1	C3
A02G036600v1	C1
A02G036800v1	C2
A02G036900v1	C5
A02G037100v1	C3
A02G037200v1	C5
A02G037300v1	C2
A02G037400v1	C3
A02G037500v1	C3
A02G037600v1	C3
A02G037700v1	C3
A02G037800v1	C3
A02G037900v1	C4
A02G038100v1	C5
A02G038200v1	C5
A02G038300v1	C1
A02G038500v1	C5
A02G038600v1	C5
A02G038700v1	C5
A02G038800v1	C4
A02G038900v1	C4
A02G039000v1	C3
A02G039100v1	C2
A02G039200v1	C3
A02G039300v1	C1
A02G039600v1	C2
A02G039700v1	C3
A02G039900v1	C4
A02G040000v1	C5
A02G040100v1	C3
A02G040300v1	C4
A02G040500v1	C2
A02G040700v1	C5
A02G040800v1	C4
A02G041000v1	C3
A02G041200v1	C2
A02G041400v1	C4
A02G041500v1	C3
A02G041600v1	C3
A02G042000v1	C2
A02G042300v1	C2
A02G042500v1	C1
A02G042600v1	C1
A02G042700v1	C1
A02G042800v1	C5
A02G042900v1	C5
A02G043000v1	C5
A02G043200v1	C3
A02G043500v1	C5
A02G043700v1	C5
A02G043800v1	C3
A02G043900v1	C3
A02G044100v1	C1
A02G044600v1	C1
A02G044800v1	C2
A02G044900v1	C1
A02G045100v1	C4
A02G045500v1	C2
A02G045900v1	C5
A02G046000v1	C5
A02G046200v1	C5
A02G046300v1	C5
A02G046400v1	C1
A02G046500v1	C4
A02G046600v1	C5
A02G046700v1	C1
A02G046800v1	C4
A02G046900v1	C5
A02G047100v1	C5
A02G047200v1	C4
A02G047500v1	C4
A02G047700v1	C3
A02G047800v1	C2
A02G047900v1	C5
A02G048000v1	C3
A02G048100v1	C3
A02G048300v1	C2
A02G048400v1	C3
A02G048500v1	C3
A02G048800v1	C5
A02G048900v1	C3
A02G049000v1	C2
A02G049400v1	C3
A02G049500v1	C1
A02G049600v1	C5
[truncated: 47,490 more rows]
