# Supplementary material for: Histone Maps in Gossypium darwinii Reveal Epigenetic Regulation Drives Subgenome Divergence and Cotton Domestication
Source: Int J Mol Sci. 2023 Jun 25;24(13):10607. doi: 10.3390/ijms241310607 (PMC10341804; doi:10.3390/ijms241310607)
Supplement: Supplementary file 1 [file ijms-24-10607-s001.zip › Supplementary Table 4.xlsx]

## Sheet: Sheet1
Supplemental Table 4. Differentially expressed homoeologous gene pairs in the A and D subgenomes.
homoeologous gene pairs		baseMean	log2FoldChange	lfcSE	stat	pvalue	padj	DEGs
A11G328000v1	D11G336400v1	208.411	3.5206	0.593852	5.92841	3.0588e-09	1.78719e-08	up
A13G179200v1	D13G191500v1	339.619	-8.39486	0.737574	-11.3817	5.15717e-30	1.12202e-28	down
A07G079500v1	D07G079500v1	131.594	1.48824	0.270466	5.5025	3.74433e-08	1.92103e-07	up
A01G168600v1	D01G182600v1	496.277	-1.3412	0.144157	-9.30372	1.35621e-20	1.86806e-19	down
A07G056000v1	D07G057100v1	47.6793	-1.29043	0.443367	-2.91053	0.00360815	0.00860769	down
A11G213800v1	D11G217600v1	343.447	2.29792	0.188675	12.1792	4.01155e-34	1.03295e-32	up
A02G038600v1	D02G047700v1	39.8663	2.58999	0.529099	4.89509	9.82627e-07	4.25708e-06	up
A05G163100v1	D05G168400v1	55.32	1.48646	0.421173	3.52935	0.000416587	0.00120686	up
A06G086500v1	D06G086700v1	1172.28	-1.84439	0.106803	-17.2691	8.03279e-67	5.08132e-65	down
A11G230100v1	D11G249600v1	590.095	1.2068	0.128696	9.37711	6.78082e-21	9.459e-20	up
A12G156000v1	D12G164000v1	40.7703	6.34937	1.11097	5.71515	1.09608e-08	6.03217e-08	up
A13G056200v1	D13G082300v1	3.7227	-5.32968	2.08213	-2.55972	0.0104757	0.0223733	down
A09G048400v1	D09G047700v1	52.767	1.82615	0.438487	4.16467	3.11807e-05	0.000109088	up
A11G043300v1	D11G042800v1	62.9982	-1.60282	0.393845	-4.06968	4.70773e-05	0.000160897	down
A08G090600v1	D08G095800v1	773.165	-1.01607	0.111861	-9.08331	1.05322e-19	1.37459e-18	down
A13G246900v1	D13G258700v1	107.041	-2.31605	0.331877	-6.97865	2.98033e-12	2.31889e-11	down
A09G222700v1	D09G222900v1	100.552	1.33003	0.31038	4.28518	1.82593e-05	6.6133e-05	up
A11G117200v1	D11G118000v1	79.4869	1.87499	0.361386	5.18834	2.12177e-07	9.95808e-07	up
A06G141500v1	D06G152700v1	220.933	-2.79172	0.234629	-11.8984	1.20591e-32	2.93591e-31	down
A13G255200v1	D13G268300v1	162.933	1.28719	0.253339	5.08088	3.75685e-07	1.70984e-06	up
A05G382700v1	D04G098400v1	188.32	-1.14599	0.223839	-5.11968	3.06052e-07	1.40785e-06	down
A11G062500v1	D11G062000v1	64.4874	1.62458	0.410529	3.95727	7.58108e-05	0.00025038	up
A08G187200v1	D07G080600v1	8.56	6.55766	1.74013	3.76849	0.000164238	0.000511044	up
A11G344200v1	D11G357200v1	101.955	1.66589	0.313352	5.31635	1.05872e-07	5.15166e-07	up
A11G250100v1	D11G228800v1	21.828	-7.88157	1.57689	-4.99817	5.78762e-07	2.57467e-06	down
A13G057600v1	D13G083900v1	304.869	-11.6861	1.45195	-8.04856	8.3776e-16	8.52443e-15	down
A12G119500v1	D12G124700v1	75.9993	2.20011	0.372234	5.91055	3.40957e-09	1.97998e-08	up
A02G028600v1	D02G036500v1	89.7975	5.30046	0.565131	9.37918	6.64853e-21	9.28631e-20	up
A13G150800v1	D13G159100v1	70.3832	-5.78154	0.726443	-7.9587	1.73862e-15	1.72969e-14	down
A05G136600v1	D05G138700v1	205.97	-1.56424	0.222381	-7.03406	2.00602e-12	1.58849e-11	down
A06G051100v1	D06G053100v1	66.9848	1.67362	0.417234	4.01122	6.04055e-05	0.000202775	up
A13G005700v1	D13G008300v1	5.78058	5.99156	1.86785	3.20774	0.00133784	0.00350632	up
A09G027200v1	D09G026900v1	39.8604	3.92543	0.649338	6.04528	1.49151e-09	8.95605e-09	up
A07G225600v1	D07G234600v1	83.6875	1.32125	0.341828	3.86526	0.000110972	0.000355667	up
A05G019200v1	D05G019900v1	10.5469	3.27941	1.12015	2.92766	0.00341528	0.0081936	up
A03G245800v1	D02G275700v1	721.417	1.05433	0.118847	8.87132	7.22865e-19	8.96393e-18	up
A11G158500v1	D11G160000v1	327.613	-4.09457	0.234484	-17.4621	2.78594e-68	1.83662e-66	down
A11G127800v1	D11G129200v1	22.6363	7.96079	1.5603	5.1021	3.3591e-07	1.53809e-06	up
A11G188200v1	D11G192000v1	277.767	2.48966	0.201877	12.3326	6.04855e-35	1.58545e-33	up
A07G145100v1	D07G147800v1	10.6134	-4.32229	1.34239	-3.21985	0.0012826	0.00337812	down
A12G090200v1	D12G098000v1	135.231	1.83278	0.271584	6.74848	1.49399e-11	1.08454e-10	up
A09G243700v1	D09G243700v1	17.3758	7.57901	1.59552	4.75019	2.03227e-06	8.40042e-06	up
A08G291600v1	D08G306900v1	47.6612	-1.55963	0.450055	-3.46541	0.000529422	0.00150408	down
A10G180000v1	D10G136400v1	210.118	1.80111	0.227268	7.92507	2.28021e-15	2.25823e-14	up
A05G227600v1	D05G236700v1	82.3371	1.41406	0.379422	3.72688	0.000193865	0.000595526	up
A01G215300v1	D01G229700v1	327.704	2.11421	0.178678	11.8325	2.65118e-32	6.36952e-31	up
A04G174700v1	D04G211900v1	140.66	-3.69614	0.333897	-11.0697	1.7597e-28	3.55957e-27	down
A03G093200v1	D03G128000v1	120.949	-10.3525	1.46546	-7.06433	1.61387e-12	1.2887e-11	down
A02G154800v1	D03G062400v1	239.586	6.45877	1.11784	5.77792	7.56285e-09	4.23129e-08	up
A03G149100v1	D02G176100v1	209.124	1.21146	0.223135	5.42929	5.65773e-08	2.84603e-07	up
A10G027400v1	D10G027200v1	112.944	4.69554	0.439496	10.6839	1.21022e-26	2.22776e-25	up
A02G049600v1	D02G057300v1	34.2184	-1.52673	0.537138	-2.84235	0.00447826	0.0104405	down
A06G095300v1	D06G096300v1	155.479	-1.06209	0.25564	-4.15466	3.25776e-05	0.00011363	down
A05G093600v1	D05G093900v1	71.3945	-1.56116	0.373202	-4.18316	2.8748e-05	0.000101061	down
A09G147500v1	D09G144100v1	157.308	2.90402	0.283882	10.2297	1.46011e-24	2.4754e-23	up
A08G125400v1	D08G141700v1	266.717	-1.24805	0.190913	-6.53726	6.26565e-11	4.27349e-10	down
A10G285100v1	D10G288800v1	7.38848	-6.3199	1.78655	-3.5375	0.000403941	0.00117364	down
A03G004400v1	D03G216400v1	228.043	-1.04406	0.203648	-5.12678	2.94745e-07	1.35879e-06	down
A10G225200v1	D10G234400v1	90.8494	-1.11141	0.339756	-3.2712	0.0010709	0.00286574	down
A01G063100v1	D01G064500v1	20.0467	-4.25033	0.977161	-4.34967	1.36341e-05	5.03815e-05	down
A05G360000v1	D05G366700v1	117.76	-2.63699	0.319883	-8.24361	1.6709e-16	1.79007e-15	down
A07G223800v1	D07G233000v1	8.3978	-6.50414	1.74439	-3.72861	0.000192542	0.000592043	down
A01G094000v1	D01G096500v1	48.1594	-1.3447	0.449586	-2.99098	0.00278082	0.00678224	down
A06G237600v1	D11G001900v1	486.076	4.65725	0.211526	22.0174	1.96064e-107	2.7508e-105	up
A05G017400v1	D05G018300v1	104.913	-2.24014	0.323787	-6.91858	4.56205e-12	3.48881e-11	down
A07G254700v1	D07G265000v1	106.382	-1.56516	0.304813	-5.13482	2.82416e-07	1.30544e-06	down
A05G338800v1	D05G344300v1	154.117	-1.55453	0.262355	-5.92529	3.11738e-09	1.81899e-08	down
A06G109500v1	D06G111800v1	42.4078	1.82139	0.526184	3.4615	0.00053717	0.00152372	up
A10G137400v1	D10G179600v1	10.2788	2.88	1.08867	2.64544	0.00815852	0.0179049	up
A10G078800v1	D10G125200v1	869.65	1.06462	0.105099	10.1296	4.08169e-24	6.74743e-23	up
A05G248300v1	D05G257500v1	750.259	-1.37065	0.123119	-11.1327	8.69742e-29	1.77575e-27	down
A13G193900v1	D13G205000v1	1257.14	1.00931	0.0997287	10.1206	4.47627e-24	7.38298e-23	up
A06G117300v1	D06G121400v1	8.26168	6.50745	1.75767	3.70231	0.000213649	0.000651634	up
A08G290300v1	D08G305300v1	528.485	-3.6399	0.16929	-21.5009	1.52592e-102	1.97621e-100	down
A08G188400v1	D08G208900v1	79.5425	1.08333	0.36051	3.005	0.00265579	0.00650923	up
A11G228900v1	D11G250700v1	44.1744	-4.21557	0.647498	-6.51056	7.48726e-11	5.06408e-10	down
A05G259100v1	D05G267100v1	646.877	-1.168	0.122829	-9.50921	1.92115e-21	2.75005e-20	down
A13G016500v1	D13G020600v1	610.714	1.1646	0.125916	9.24896	2.26686e-20	3.09318e-19	up
A10G016900v1	D10G016000v1	34.3265	-2.81472	0.593756	-4.74054	2.1315e-06	8.78887e-06	down
A01G133100v1	D01G140100v1	69.4316	-2.31757	0.407006	-5.6942	1.2395e-08	6.77548e-08	down
A06G152800v1	D06G163000v1	142.581	1.16792	0.263191	4.43752	9.10026e-06	3.44359e-05	up
A02G027100v1	D02G027600v1	294.955	1.00554	0.177874	5.65311	1.57572e-08	8.5029e-08	up
A04G111100v1	D04G145900v1	284.822	-1.59959	0.189586	-8.43728	3.24809e-17	3.64756e-16	down
A09G188600v1	D09G187300v1	119.154	1.0225	0.288252	3.54724	0.000389284	0.00113497	up
A08G115800v1	D08G130500v1	289.256	-1.01814	0.18094	-5.62698	1.83397e-08	9.81182e-08	down
A06G075800v1	D06G076200v1	156.39	1.25741	0.256161	4.90866	9.16996e-07	3.98378e-06	up
A01G083900v1	D01G085300v1	848.956	1.54083	0.112972	13.6391	2.34316e-42	7.73527e-41	up
A12G076900v1	D12G079500v1	33.3395	1.68137	0.551769	3.04723	0.00230961	0.0057483	up
A08G102900v1	D08G109300v1	4.27149	5.55513	1.99887	2.77913	0.00545044	0.0124706	up
A03G095600v1	D03G130700v1	596.535	-1.07651	0.126625	-8.50154	1.87095e-17	2.12945e-16	down
A06G238400v1	D06G251400v1	13.1309	-2.08144	0.883325	-2.35637	0.0184548	0.0369382	down
A13G195600v1	D13G206600v1	378.4	1.68525	0.170682	9.87359	5.41884e-23	8.39959e-22	up
A04G128900v1	D04G165100v1	70.1209	-1.00696	0.389042	-2.58831	0.00964489	0.0207896	down
A05G431600v1	D04G036700v1	54.4575	1.15293	0.484328	2.38047	0.0172907	0.0348569	up
A09G005600v1	D09G005200v1	134.771	-1.55246	0.2778	-5.58842	2.29148e-08	1.21324e-07	down
A05G452300v1	D04G014300v1	1836.79	-1.325	0.0747304	-17.7304	2.44359e-70	1.65581e-68	down
A07G049700v1	D07G050900v1	180.728	1.59781	0.241459	6.6173	3.65812e-11	2.56209e-10	up
A02G172000v1	D03G043900v1	319.212	1.36627	0.177118	7.71392	1.2201e-14	1.15404e-13	up
A13G235600v1	D13G248200v1	130.307	2.50651	0.298286	8.40304	4.35075e-17	4.85099e-16	up
A09G265800v1	D09G266800v1	4.24596	5.54748	2.02052	2.74557	0.00604062	0.0136808	up
A07G191800v1	D07G199000v1	80.3753	-1.11564	0.367804	-3.03326	0.00241927	0.0059892	down
A09G211900v1	D09G212400v1	92.9402	1.09394	0.319859	3.42008	0.000626025	0.00175233	up
A06G184400v1	D06G196600v1	58.3163	1.2749	0.44998	2.83324	0.00460782	0.0107163	up
A11G298200v1	D11G305100v1	819.633	1.01915	0.119105	8.55675	1.16093e-17	1.33593e-16	up
A11G288000v1	D11G293900v1	18.8131	2.57295	0.785678	3.27482	0.00105731	0.00283317	up
A12G215100v1	D12G223400v1	145.133	-1.42164	0.257437	-5.52229	3.34617e-08	1.72893e-07	down
A02G103900v1	D02G135200v1	27.9564	8.26509	1.53969	5.36801	7.96105e-08	3.92794e-07	up
A03G138200v1	D02G167200v1	10.8669	-2.94266	1.07003	-2.75008	0.00595801	0.0135147	down
A13G115000v1	D13G107000v1	37.2394	-2.96455	1.11814	-2.65133	0.00801762	0.0176293	down
A10G299800v1	D10G312300v1	235.798	1.25907	0.208287	6.04489	1.49509e-09	8.9726e-09	up
A11G214700v1	D11G218300v1	35.143	-4.47821	0.754742	-5.93343	2.96666e-09	1.73659e-08	down
A08G087700v1	D13G073400v1	23.3994	2.29817	0.68945	3.33333	0.000858118	0.00234097	up
A11G275600v1	D11G281100v1	15.3265	-3.19516	0.915456	-3.49024	0.000482594	0.00138145	down
A06G032200v1	D06G033000v1	21.0408	-7.82887	1.5724	-4.97893	6.39363e-07	2.82645e-06	down
A12G108300v1	D12G114200v1	229.611	-2.16128	0.216485	-9.98352	1.79962e-23	2.86669e-22	down
A05G028400v1	D05G030600v1	311.16	1.04662	0.176892	5.91672	3.28416e-09	1.91172e-08	up
A06G065400v1	D06G065000v1	96.5322	1.07689	0.327815	3.28506	0.00101961	0.00274255	up
A12G094900v1	D12G080600v1	97.834	-2.69444	0.346117	-7.78477	6.98404e-15	6.68678e-14	down
A13G266500v1	D13G280600v1	52.2574	-1.23842	0.438622	-2.82344	0.00475115	0.0110227	down
A05G038500v1	D05G040200v1	23.9229	3.47533	0.773453	4.49326	7.01407e-06	2.69849e-05	up
A05G348600v1	D05G357800v1	11.5823	3.87319	1.1682	3.31552	0.000914734	0.00248428	up
A06G209400v1	D06G221700v1	919.869	1.47737	0.108627	13.6004	3.98114e-42	1.30442e-40	up
A03G257600v1	D02G287600v1	153.51	-1.60866	0.259642	-6.19567	5.80385e-10	3.63147e-09	down
A11G097900v1	D11G097900v1	126.853	-5.03154	0.455856	-11.0376	2.51787e-28	5.03735e-27	down
A09G026100v1	D09G026000v1	6.89259	-4.72003	1.79746	-2.62594	0.00864095	0.0188371	down
A05G305900v1	D05G313000v1	187.51	-1.46865	0.226991	-6.47008	9.79501e-11	6.55807e-10	down
A05G374100v1	D04G089500v1	9.38199	-4.13415	1.37866	-2.99868	0.00271156	0.00663551	down
A12G195000v1	D12G202600v1	34.5578	-8.54518	1.52053	-5.61985	1.91118e-08	1.02049e-07	down
A05G432300v1	D04G035100v1	12.7889	7.13757	1.64944	4.32727	1.50966e-05	5.53652e-05	up
A02G182900v1	D03G032700v1	49.6522	1.03626	0.437318	2.36957	0.0178087	0.0357891	up
A05G209000v1	D05G216600v1	136.375	-2.00452	0.281919	-7.11028	1.15807e-12	9.39459e-12	down
A11G085300v1	D11G085100v1	16.5508	-4.39051	1.07651	-4.07845	4.53367e-05	0.000155214	down
A12G204100v1	D12G212200v1	78.1228	1.76621	0.364055	4.85148	1.22542e-06	5.23332e-06	up
A09G233900v1	D09G233200v1	61.66	2.72333	0.481063	5.66107	1.50434e-08	8.13379e-08	up
A03G151300v1	D02G178400v1	291.696	1.80104	0.195054	9.23353	2.61852e-20	3.56194e-19	up
A10G060900v1	D10G060300v1	363.015	-1.83048	0.168551	-10.8601	1.7857e-27	3.40745e-26	down
A08G248000v1	D08G262800v1	37.6289	2.15297	0.529606	4.06523	4.79852e-05	0.000163667	up
A10G029700v1	D10G029500v1	84.0434	-1.31286	0.339874	-3.86279	0.000112098	0.00035896	down
A02G080800v1	D02G090400v1	6.97279	-3.03727	1.35896	-2.235	0.0254175	0.0489454	down
A03G157200v1	D02G188000v1	25.9026	5.68774	1.1624	4.8931	9.92611e-07	4.29608e-06	up
A02G052100v1	D02G059600v1	2992.11	-1.00419	0.0600475	-16.7232	8.87475e-63	5.0982e-61	down
A01G167500v1	D01G185600v1	1018.71	-2.57201	0.10906	-23.5834	5.70948e-123	9.91773e-121	down
A08G189200v1	D08G209600v1	182.027	-1.43319	0.257574	-5.56418	2.63391e-08	1.38179e-07	down
A01G154700v1	D01G163200v1	1005.7	2.39604	0.106655	22.4653	9.0763e-112	1.36064e-109	up
A05G072300v1	D05G073800v1	4.174	-5.49654	2.02847	-2.7097	0.00673443	0.0150928	down
A12G095900v1	D12G091800v1	946.759	-1.22916	0.101826	-12.0712	1.50007e-33	3.76946e-32	down
A11G100200v1	D11G100600v1	64.112	-2.07505	0.40666	-5.10268	3.34883e-07	1.53371e-06	down
A06G188600v1	D06G200900v1	18.3075	-2.81748	0.827679	-3.40407	0.000663899	0.00184964	down
A04G075200v1	D04G114600v1	1674.77	1.05529	0.0775001	13.6167	3.18784e-42	1.04763e-40	up
A08G136800v1	D08G153600v1	52.9682	1.5352	0.435414	3.52585	0.000422132	0.00122099	up
A05G340900v1	D05G346600v1	127.33	1.08343	0.281279	3.8518	0.000117253	0.000374263	up
A01G074800v1	D01G076400v1	17.0587	-2.54204	0.835057	-3.04415	0.00233342	0.00580426	down
A10G128500v1	D10G190300v1	61.5698	-2.15329	0.421252	-5.11164	3.19369e-07	1.46572e-06	down
A05G282800v1	D05G290600v1	546.95	-1.32646	0.133916	-9.90513	3.95436e-23	6.19536e-22	down
A11G096700v1	D11G096300v1	281.488	-11.5711	1.45256	-7.96602	1.63869e-15	1.63399e-14	down
A10G179300v1	D10G137100v1	49.0447	1.16766	0.452449	2.58075	0.00985851	0.0211958	up
A01G247900v1	D01G261200v1	20.3347	3.42389	0.827148	4.1394	3.48221e-05	0.00012088	up
A07G092000v1	D07G092500v1	162.673	3.67242	0.312164	11.7644	5.95492e-32	1.41056e-30	up
A12G245300v1	D12G255400v1	21.485	-4.7786	1.02686	-4.65362	3.2616e-06	1.31394e-05	down
A11G000900v1	D11G001000v1	73.6355	3.72152	0.465042	8.00255	1.21866e-15	1.22916e-14	up
A12G278000v1	D12G287400v1	93.4309	-2.10351	0.341715	-6.15573	7.47304e-10	4.62825e-09	down
A07G069100v1	D07G070100v1	276.061	-1.61828	0.192432	-8.4096	4.11428e-17	4.60139e-16	down
A06G150400v1	D06G165300v1	210.894	1.22227	0.223385	5.47157	4.46063e-08	2.26572e-07	up
A12G255200v1	D12G265000v1	109.464	10.2344	1.46801	6.97166	3.13221e-12	2.43102e-11	up
A09G287500v1	D09G286000v1	12.9693	2.273	0.927958	2.44946	0.014307	0.0294352	up
A05G271300v1	D05G279000v1	590.041	1.49158	0.130655	11.4162	3.47217e-30	7.63006e-29	up
A12G287600v1	D12G297000v1	90.2072	-1.92021	0.334232	-5.74515	9.18382e-09	5.08748e-08	down
A13G028500v1	D13G032500v1	182.289	-5.77592	0.451333	-12.7975	1.69371e-37	4.82057e-36	down
A09G171300v1	D09G167200v1	66.1829	-3.9542	0.508493	-7.77631	7.46728e-15	7.13696e-14	down
A09G199300v1	D09G199200v1	50.192	-1.08116	0.429876	-2.51504	0.0119018	0.0250596	down
A05G094300v1	D05G094600v1	70.6476	1.21678	0.372076	3.27026	0.00107449	0.00287499	up
A07G267600v1	D07G278500v1	143.973	1.85874	0.271935	6.83523	8.18746e-12	6.0952e-11	up
A08G126300v1	D08G142400v1	381.705	1.36488	0.162976	8.37472	5.53537e-17	6.14053e-16	up
A10G284400v1	D10G289500v1	693.183	-1.25019	0.118229	-10.5743	3.92038e-26	7.03899e-25	down
A03G184900v1	D02G214700v1	3.71559	-5.32723	2.07455	-2.5679	0.0102318	0.0218909	down
A04G131800v1	D04G167400v1	230.808	-11.2848	1.45476	-7.75714	8.68631e-15	8.2552e-14	down
A09G008600v1	D09G007500v1	80.4535	1.23738	0.345399	3.58246	0.000340372	0.0010009	up
A01G208200v1	D01G221900v1	29.4161	-2.77238	0.647941	-4.27876	1.87941e-05	6.78902e-05	down
A06G129500v1	D06G134900v1	137.706	-1.22996	0.286092	-4.29915	1.71451e-05	6.23763e-05	down
A03G158800v1	D02G190700v1	2784.45	3.66682	0.0785601	46.6753	0	0	up
A11G044800v1	D11G044200v1	2573.21	3.89677	0.0862269	45.192	0	0	up
A07G061800v1	D07G062800v1	5.52481	5.92641	1.88605	3.14223	0.00167664	0.00430106	up
A11G352800v1	D11G370200v1	127.857	-2.39886	0.31453	-7.62682	2.40608e-14	2.22202e-13	down
A08G091900v1	D08G097200v1	5.68442	-5.94103	1.87408	-3.17011	0.00152384	0.00394467	down
A06G167700v1	D06G176500v1	428.698	-6.5505	0.366722	-17.8623	2.3183e-71	1.61595e-69	down
A02G212200v1	D03G001400v1	940.004	-1.11567	0.102602	-10.8738	1.53707e-27	2.95363e-26	down
A07G039900v1	D07G040400v1	73.4998	6.19713	0.796632	7.77916	7.30078e-15	6.98087e-14	up
A12G195800v1	D12G203300v1	107.497	-1.59978	0.303154	-5.27714	1.31217e-07	6.30919e-07	down
A07G008600v1	D07G009600v1	197	1.5707	0.227645	6.89979	5.20805e-12	3.95519e-11	up
A13G162200v1	D13G172100v1	317.706	-1.47462	0.178476	-8.26226	1.42942e-16	1.53965e-15	down
A13G040900v1	D13G043700v1	126.692	-2.96987	0.311791	-9.52521	1.64713e-21	2.36553e-20	down
A10G039500v1	D10G039100v1	35.7183	-1.35835	0.531529	-2.55554	0.0106022	0.0226059	down
A06G175400v1	D06G186100v1	317.048	1.31027	0.175074	7.4841	7.20397e-14	6.40688e-13	up
A13G063200v1	D13G075700v1	46.4654	3.06809	0.526049	5.83232	5.4661e-09	3.10664e-08	up
A11G278200v1	D11G283400v1	3.4508	-5.2214	2.11221	-2.47201	0.0134355	0.0278838	down
A05G000600v1	D05G000900v1	47.583	1.63618	0.464319	3.52382	0.000425365	0.0012292	up
A13G049600v1	D13G053300v1	8.27488	5.0253	1.73582	2.89505	0.00379098	0.00899827	up
A10G219200v1	D10G227800v1	6.93007	-6.22665	1.80582	-3.4481	0.000564545	0.00159422	down
A07G239400v1	D07G248800v1	146.726	-1.04194	0.255019	-4.08573	4.39391e-05	0.000150736	down
A03G227800v1	D02G257900v1	23.2498	2.08663	0.677823	3.07842	0.00208098	0.00522441	up
A09G150300v1	D09G147100v1	157.582	-1.23926	0.267142	-4.63894	3.50203e-06	1.40589e-05	down
A08G144800v1	D08G163200v1	43.4562	3.12965	0.548923	5.70144	1.18797e-08	6.50676e-08	up
A12G059100v1	D12G060500v1	37.715	-2.53044	0.584313	-4.33063	1.48686e-05	5.45837e-05	down
A07G157700v1	D07G160800v1	14	2.21017	0.956487	2.31072	0.0208485	0.0411425	up
A03G062200v1	D03G153800v1	138.293	1.08982	0.259367	4.20185	2.64742e-05	9.35036e-05	up
A05G333300v1	D05G337700v1	399.491	1.16245	0.160568	7.23963	4.49916e-13	3.75708e-12	up
A01G084400v1	D01G086000v1	7.88629	-4.92735	1.74907	-2.81712	0.00484559	0.0112047	down
A12G292000v1	D12G301300v1	1722.67	-1.27547	0.0798209	-15.9792	1.78455e-57	8.91745e-56	down
A07G165900v1	D07G170400v1	22.4729	-7.92427	1.56093	-5.07664	3.84162e-07	1.74624e-06	down
A03G052700v1	D03G163400v1	8.32594	5.03331	1.74125	2.89063	0.00384468	0.00910994	up
A08G071100v1	D08G076400v1	295.866	1.03461	0.177887	5.8161	6.02363e-09	3.40494e-08	up
A12G227300v1	D12G236900v1	98.5212	1.21631	0.330578	3.67934	0.000233839	0.00070887	up
A03G247200v1	D02G277100v1	112.837	3.05637	0.336084	9.09406	9.54052e-20	1.24665e-18	up
A03G114200v1	D02G148700v1	264.008	-1.48222	0.195217	-7.59269	3.13325e-14	2.86575e-13	down
A03G076000v1	D03G141000v1	109.419	1.85774	0.313355	5.92856	3.056e-09	1.7865e-08	up
A06G111800v1	D06G114800v1	122.011	-2.40703	0.300283	-8.01586	1.0937e-15	1.10721e-14	down
A12G206600v1	D12G214500v1	65.0451	-1.37404	0.381312	-3.60346	0.000314011	0.000931016	down
A13G171900v1	D13G183300v1	299.757	-1.21698	0.189783	-6.41247	1.43176e-10	9.43885e-10	down
A06G185300v1	D06G197300v1	166.637	-1.12621	0.241123	-4.6707	3.00176e-06	1.21486e-05	down
A02G191800v1	D03G022200v1	44.4379	2.49794	0.507494	4.9221	8.56208e-07	3.73133e-06	up
A05G187500v1	D05G194900v1	93.1055	-2.37032	0.340846	-6.95422	3.54511e-12	2.73499e-11	down
A10G040600v1	D10G040200v1	126.551	2.41287	0.29944	8.05794	7.75888e-16	7.90958e-15	up
A05G229100v1	D05G238100v1	41.3536	-1.42163	0.535532	-2.65462	0.00793979	0.0174704	down
A01G127100v1	D01G133500v1	16.117	-4.95574	1.24163	-3.99132	6.57069e-05	0.000219293	down
A11G265300v1	D11G272200v1	81.8639	-1.33812	0.363402	-3.6822	0.000231229	0.000701347	down
A02G031900v1	D02G039500v1	22.8742	2.90193	0.791805	3.66496	0.000247379	0.000746813	up
A11G102200v1	D11G102900v1	57.1595	-4.29662	0.571386	-7.51965	5.49246e-14	4.94138e-13	down
A04G153900v1	D04G189800v1	220.536	1.086	0.21068	5.15474	2.53979e-07	1.18047e-06	up
A12G008000v1	D12G008900v1	11.8415	-7.00011	1.66191	-4.21208	2.53033e-05	8.96717e-05	down
A02G040100v1	D02G049100v1	311.768	11.7447	1.45199	8.08872	6.02961e-16	6.19869e-15	up
A06G088100v1	D06G088100v1	119.085	1.02498	0.282873	3.62347	0.000290677	0.000867828	up
A11G111600v1	D11G112500v1	30.4093	-3.0608	0.661071	-4.63006	3.65555e-06	1.46483e-05	down
A09G070500v1	D09G070300v1	202.988	-1.65238	0.238231	-6.93603	4.0328e-12	3.09597e-11	down
A11G161200v1	D11G163000v1	403.43	-1.13195	0.154186	-7.34147	2.11253e-13	1.81464e-12	down
A03G175400v1	D02G205800v1	468.731	-1.30884	0.143395	-9.1275	7.00991e-20	9.25926e-19	down
A08G109700v1	D08G111100v1	910.845	-1.79612	0.11095	-16.1886	6.07429e-59	3.11353e-57	down
A05G095000v1	D05G095300v1	433.152	-3.17058	0.178544	-17.7579	1.4963e-70	1.02342e-68	down
A03G086300v1	D03G120200v1	315.43	-1.17232	0.177772	-6.59451	4.26653e-11	2.96544e-10	down
A11G098600v1	D11G098600v1	28.9852	1.4792	0.575293	2.57121	0.0101343	0.0217269	up
A07G128200v1	D07G128400v1	9.00708	2.65716	1.11862	2.3754	0.01753	0.0353003	up
A08G042300v1	D08G046700v1	9.87265	-6.73769	1.70226	-3.95807	7.55568e-05	0.000249654	down
A06G187800v1	D06G200000v1	398.598	-1.53801	0.158319	-9.71464	2.61159e-22	3.93121e-21	down
A03G033000v1	D03G184200v1	281.67	-1.35623	0.19825	-6.84102	7.86315e-12	5.87174e-11	down
A05G230700v1	D05G239700v1	395.054	-1.55602	0.163728	-9.50369	2.02589e-21	2.89429e-20	down
A08G028000v1	D08G024300v1	3.70847	-5.32478	2.07119	-2.57088	0.010144	0.0217413	down
A13G097000v1	D13G121600v1	318.425	1.41983	0.179189	7.92366	2.3062e-15	2.28294e-14	up
A02G134800v1	D03G087800v1	300.335	-2.85408	0.202734	-14.078	5.18722e-45	1.83413e-43	down
A09G205800v1	D09G205800v1	28.7583	-1.48374	0.610782	-2.42925	0.0151301	0.0309748	down
A12G280500v1	D12G289700v1	8.91696	-5.10885	1.7195	-2.97111	0.00296721	0.00719753	down
A08G051800v1	D08G056300v1	115.689	-7.8397	1.05436	-7.43552	1.04158e-13	9.17757e-13	down
A10G052600v1	D10G051400v1	113.574	-1.01379	0.301818	-3.35895	0.000782384	0.00214937	down
A06G130500v1	D06G135600v1	283.269	-1.38963	0.1907	-7.287	3.16925e-13	2.67613e-12	down
A07G071900v1	D07G072400v1	121.725	1.05655	0.275729	3.83184	0.000127186	0.000403145	up
A08G239500v1	D08G253900v1	195.377	5.34418	0.387767	13.7819	3.27498e-43	1.10959e-41	up
A03G152100v1	D02G179100v1	172.724	1.2642	0.252841	4.99997	5.73385e-07	2.55179e-06	up
A13G000400v1	D13G002800v1	547.828	-1.12163	0.131655	-8.5195	1.60249e-17	1.83056e-16	down
A06G017400v1	D06G016800v1	34.9921	-1.31313	0.521356	-2.51868	0.0117797	0.0248217	down
A08G248500v1	D08G263500v1	109.1	-1.3988	0.309707	-4.51652	6.28651e-06	2.43398e-05	down
A04G195300v1	D04G234100v1	4.4459	-5.5866	1.97891	-2.82307	0.00475657	0.0110306	down
A08G258300v1	D08G273100v1	50.0027	1.53008	0.450253	3.39827	0.000678125	0.00188663	up
A06G057400v1	D06G058400v1	249.824	-1.49969	0.208472	-7.19371	6.30524e-13	5.19784e-12	down
A06G004800v1	D06G004000v1	1659.32	-5.45651	0.142056	-38.4109	0	0	down
A13G017800v1	D13G022000v1	706.24	1.23706	0.119052	10.391	2.72598e-25	4.76545e-24	up
A11G100600v1	D11G101300v1	31.8989	2.7163	0.61758	4.39829	1.09105e-05	4.08341e-05	up
A01G066200v1	D01G067500v1	54.0854	1.02828	0.420006	2.44826	0.0143548	0.0295229	up
A12G069100v1	D12G070100v1	19.6035	1.76655	0.722361	2.44552	0.0144643	0.0297259	up
A01G042300v1	D01G045100v1	64.9362	-1.32149	0.392769	-3.36455	0.00076668	0.00210861	down
A07G257400v1	D07G268000v1	100.252	1.13906	0.316431	3.5997	0.00031859	0.000943185	up
A05G408800v1	D11G036900v1	2517.31	1.48476	0.0696776	21.309	9.36206e-101	1.17763e-98	up
A03G021600v1	D03G195400v1	103.109	7.11151	0.878846	8.09188	5.87526e-16	6.04569e-15	up
A04G072700v1	D05G379300v1	25.5209	-1.40094	0.628076	-2.23053	0.0257126	0.0494807	down
A08G085200v1	D08G089900v1	487.768	1.61086	0.159556	10.0959	5.75887e-24	9.4557e-23	up
A03G174000v1	D02G204200v1	135.327	-1.43716	0.268516	-5.35222	8.68795e-08	4.27023e-07	down
A11G392600v1	D11G406100v1	46.3575	5.19031	0.769617	6.74402	1.54066e-11	1.11657e-10	up
A08G013200v1	D08G013100v1	237.194	-1.00751	0.215569	-4.6737	2.95814e-06	1.19831e-05	down
A07G010000v1	D07G010700v1	15.8076	1.84375	0.822049	2.24287	0.0249053	0.0480055	up
A03G122500v1	D02G139800v1	251.076	4.46448	0.295452	15.1107	1.37743e-51	5.91132e-50	up
A13G186600v1	D13G196800v1	1495.2	6.7177	0.20674	32.4934	1.32007e-231	6.87913e-229	up
A07G042000v1	D07G042700v1	67.2866	-1.85275	0.392623	-4.7189	2.37127e-06	9.72274e-06	down
A12G197800v1	D12G205600v1	204.155	-1.28225	0.224902	-5.70136	1.18855e-08	6.50833e-08	down
A03G100200v1	D02G117400v1	44.2653	-8.90203	1.50495	-5.91517	3.31523e-09	1.92881e-08	down
A13G164000v1	D13G174400v1	2147.25	1.10875	0.0692753	16.005	1.17883e-57	5.91766e-56	up
A02G126500v1	D03G086200v1	532.456	1.05543	0.136366	7.73972	9.96322e-15	9.44413e-14	up
A06G128600v1	D06G134000v1	15.2682	-4.2744	1.11964	-3.81766	0.000134724	0.000425004	down
A13G019200v1	D13G023600v1	103.498	1.06008	0.304102	3.48594	0.000490411	0.00140203	up
A08G237700v1	D08G252300v1	14.3563	-2.07947	0.88588	-2.34735	0.0189074	0.0377545	down
A01G181200v1	D01G197500v1	2.97105	-5.00469	2.20377	-2.27096	0.0231494	0.0450493	down
A09G167500v1	D09G170600v1	151.755	-2.95712	0.295392	-10.0108	1.36576e-23	2.19474e-22	down
A06G036800v1	D06G037600v1	57.9913	1.11975	0.398945	2.80679	0.00500382	0.0115392	up
A11G170900v1	D11G263300v1	65.1635	9.48616	1.4846	6.3897	1.66216e-10	1.09006e-09	up
A11G133900v1	D11G134900v1	34.7328	2.28547	0.569317	4.0144	5.95964e-05	0.000200182	up
A08G168000v1	D08G187900v1	177.08	1.2563	0.244204	5.14448	2.68269e-07	1.24451e-06	up
A09G181900v1	D09G180200v1	125.637	-1.12516	0.28996	-3.88041	0.000104279	0.000335888	down
A09G081900v1	D09G083800v1	18.1072	1.95447	0.761823	2.56551	0.0103024	0.0220269	up
A06G079900v1	D06G079200v1	169.509	1.43639	0.241649	5.94413	2.77925e-09	1.62907e-08	up
A04G122700v1	D04G158500v1	17.2992	7.57341	1.599	4.73633	2.17624e-06	8.96001e-06	up
A07G205000v1	D11G176500v1	105.705	-10.1577	1.47241	-6.89867	5.24925e-12	3.98371e-11	down
A05G377600v1	D04G092900v1	206.874	-1.30997	0.225926	-5.79822	6.70243e-09	3.77208e-08	down
A05G021700v1	D05G022400v1	74.7611	-1.56607	0.364034	-4.30199	1.69273e-05	6.16554e-05	down
A11G121100v1	D11G122100v1	58.8534	2.53571	0.446575	5.67812	1.3618e-08	7.39964e-08	up
A04G042700v1	D05G414000v1	167.889	1.07244	0.238653	4.49374	6.99839e-06	2.69293e-05	up
A03G185800v1	D02G215400v1	75.3053	1.85781	0.366677	5.06661	4.04969e-07	1.83663e-06	up
A11G153300v1	D11G154100v1	59.7242	-2.17676	0.418308	-5.20372	1.95337e-07	9.20417e-07	down
A09G091300v1	D09G093400v1	20.2606	-7.77467	1.5736	-4.94068	7.78491e-07	3.4105e-06	down
A03G217300v1	D02G247400v1	87.4925	1.61626	0.341319	4.73534	2.18683e-06	9.00192e-06	up
A02G116500v1	D03G111300v1	81.9193	1.04947	0.341744	3.07094	0.00213387	0.00534555	up
A06G251000v1	D06G264000v1	235.686	-1.64525	0.204482	-8.04597	8.55659e-16	8.69847e-15	down
A07G119100v1	D07G119500v1	464.951	2.75474	0.159826	17.2359	1.42856e-66	9.01065e-65	up
A07G052400v1	D07G053900v1	30.0903	2.02708	0.580957	3.48921	0.000484449	0.00138621	up
A05G252500v1	D05G261600v1	92.4884	-2.08416	0.348436	-5.98147	2.21128e-09	1.30594e-08	down
A05G419000v1	D04G049300v1	754.849	-1.00765	0.112717	-8.93963	3.90485e-19	4.91746e-18	down
A11G067600v1	D11G067300v1	118.278	1.1654	0.297966	3.91118	9.18477e-05	0.000299563	up
A07G085600v1	D07G085900v1	131.678	-1.46596	0.277387	-5.28489	1.25779e-07	6.06771e-07	down
A10G011200v1	D10G010500v1	158.468	2.55868	0.271955	9.40846	5.03451e-21	7.08619e-20	up
A09G215000v1	D09G215400v1	149.721	1.85925	0.258811	7.18379	6.78052e-13	5.57286e-12	up
A07G128900v1	D07G129100v1	141.307	1.29423	0.27189	4.76014	1.93455e-06	8.02835e-06	up
A01G217900v1	D01G232200v1	616.389	1.05571	0.124822	8.45768	2.72757e-17	3.07091e-16	up
A10G042900v1	D10G042500v1	49.4415	-9.06163	1.49812	-6.04865	1.46063e-09	8.78746e-09	down
A06G168300v1	D06G177200v1	132.179	-9.03562	1.45864	-6.19454	5.84567e-10	3.6545e-09	down
A02G064900v1	D02G072600v1	298.685	1.10478	0.177269	6.23222	4.59871e-10	2.90482e-09	up
A07G095000v1	D07G095500v1	71.883	-1.19739	0.370937	-3.22802	0.0012465	0.00329057	down
A05G168200v1	D05G174800v1	11.8146	-2.78894	1.082	-2.57758	0.00994938	0.0213681	down
A10G020700v1	D10G020100v1	65.1809	1.46996	0.392228	3.74772	0.000178452	0.000552133	up
A05G148600v1	D05G152400v1	33.1574	8.51171	1.5242	5.58437	2.34554e-08	1.23942e-07	up
A09G192400v1	D09G191400v1	1092.1	-2.46264	0.102762	-23.9645	6.53097e-127	1.23227e-124	down
A12G132400v1	D12G139600v1	8.8328	6.60251	1.73674	3.80167	0.000143722	0.00045159	up
A10G210800v1	D10G218900v1	9.01665	5.15288	1.71635	3.00223	0.00268005	0.0065628	up
A07G231200v1	D07G239900v1	19.3677	-1.92808	0.723364	-2.66544	0.00768883	0.0169936	down
A04G015400v1	D05G447600v1	449.47	1.07373	0.154289	6.95922	3.42151e-12	2.64617e-11	up
A09G103300v1	D09G106200v1	38.6584	-1.56204	0.507338	-3.07888	0.00207778	0.00521757	down
A08G096600v1	D08G103800v1	274.268	-2.79643	0.219449	-12.743	3.41169e-37	9.59791e-36	down
A13G050500v1	D13G054000v1	21.2136	-3.25528	0.795906	-4.09004	4.31306e-05	0.00014809	down
A12G305400v1	D12G314800v1	47.1014	1.12406	0.458291	2.45271	0.0141784	0.0292143	up
A01G026000v1	D01G026600v1	390.154	-1.51483	0.172023	-8.80594	1.29758e-18	1.59193e-17	down
A13G081600v1	D13G086000v1	212.35	-2.4829	0.232865	-10.6624	1.52641e-26	2.79804e-25	down
A10G219800v1	D10G228500v1	33.4626	1.58408	0.553281	2.86306	0.00419568	0.00986581	up
A07G240100v1	D07G249500v1	56.0014	-1.79417	0.435733	-4.1176	3.82843e-05	0.000132395	down
A07G177500v1	D07G183900v1	623.055	-1.11641	0.124268	-8.98391	2.61302e-19	3.327e-18	down
A09G019800v1	D09G019400v1	64.0714	-2.00637	0.427112	-4.69753	2.6333e-06	1.07308e-05	down
A05G427800v1	D04G040800v1	228.801	-1.98072	0.215816	-9.17781	4.3996e-20	5.90037e-19	down
A09G080400v1	D09G082200v1	1027.24	-2.15992	0.102984	-20.9734	1.14752e-97	1.39532e-95	down
A12G097200v1	D12G093200v1	402.708	-1.30333	0.155313	-8.39161	4.79521e-17	5.33567e-16	down
A05G264900v1	D05G272800v1	201.665	1.68112	0.226539	7.42085	1.1637e-13	1.01961e-12	up
A01G158900v1	D08G123000v1	62.7935	9.43301	1.48651	6.34573	2.21376e-10	1.43648e-09	up
A06G190100v1	D06G202300v1	24.0574	2.04242	0.652705	3.12916	0.00175309	0.00447938	up
A03G237800v1	D02G268200v1	319.968	-2.44942	0.193252	-12.6748	8.16131e-37	2.26396e-35	down
A08G248300v1	D13G220300v1	15.0738	7.3744	1.61698	4.56059	5.10109e-06	2.00265e-05	up
A11G079400v1	D11G078500v1	227.007	-1.07444	0.218659	-4.91377	8.9342e-07	3.88521e-06	down
A03G097100v1	D03G132100v1	695.793	-1.73097	0.131145	-13.1989	8.89968e-40	2.73578e-38	down
A11G005800v1	D11G005600v1	42.5018	1.82624	0.507115	3.60123	0.000316711	0.000938288	up
A10G054700v1	D10G053700v1	202.726	4.99451	0.356414	14.0132	1.2938e-44	4.51633e-43	up
A11G209700v1	D11G212800v1	82.9195	1.67639	0.343584	4.87914	1.06552e-06	4.59076e-06	up
A06G082200v1	D06G081900v1	14.3618	-2.61786	0.88296	-2.96487	0.00302809	0.00733383	down
A13G107000v1	D13G111100v1	9.1141	6.64726	1.74354	3.8125	0.000137568	0.000433292	up
A05G188400v1	D05G195600v1	174.102	-4.14478	0.325863	-12.7194	4.61368e-37	1.28636e-35	down
A01G099200v1	D01G102200v1	24.6866	-3.93545	0.829532	-4.74418	2.09348e-06	8.64201e-06	down
A01G127800v1	D01G134200v1	279.472	-1.21133	0.185967	-6.51371	7.33191e-11	4.96668e-10	down
A11G195900v1	D11G200000v1	9.29327	6.67665	1.71808	3.88612	0.00010186	0.000328966	up
A05G075400v1	D05G076800v1	16.2385	2.84963	0.875886	3.25342	0.00114023	0.00303641	up
A11G246800v1	D11G232000v1	5.02178	5.78871	1.92559	3.0062	0.00264537	0.00648804	up
A01G068700v1	D01G069800v1	61.0343	1.01006	0.38991	2.59049	0.00958389	0.0206663	up
A04G144300v1	D04G180400v1	2936.38	1.28993	0.0616324	20.9295	2.88596e-97	3.43289e-95	up
A12G070800v1	D12G072400v1	145.113	2.56635	0.283842	9.04147	1.54582e-19	2.00079e-18	up
A08G095700v1	D08G102200v1	11.5867	6.99436	1.6675	4.19451	2.73463e-05	9.6428e-05	up
A09G094000v1	D13G253900v1	35.7065	8.61838	1.51808	5.67715	1.36959e-08	7.44011e-08	up
A04G114900v1	D04G149600v1	141.765	-6.1197	0.562976	-10.8703	1.59729e-27	3.0613e-26	down
A08G168800v1	D08G188600v1	6284.06	1.10288	0.0459748	23.9889	3.63323e-127	6.91482e-125	up
A10G134100v1	D10G183700v1	97.8625	1.03926	0.320289	3.24476	0.0011755	0.00312196	up
A01G077800v1	D01G079400v1	178.981	1.11566	0.23835	4.68076	2.85817e-06	1.15996e-05	up
A05G351500v1	D07G131800v1	74.3508	-5.86081	0.722211	-8.11509	4.8544e-16	5.02594e-15	down
A01G024200v1	D01G025000v1	159.877	-1.43759	0.2672	-5.38021	7.43989e-08	3.68409e-07	down
A05G404700v1	D04G061600v1	15.553	2.99786	0.884582	3.38901	0.000701445	0.00194434	up
A11G394800v1	D11G408400v1	57.1888	-9.27212	1.49214	-6.21398	5.16595e-10	3.25092e-09	down
A01G055700v1	D01G057000v1	345.101	2.01626	0.173506	11.6207	3.23303e-31	7.41732e-30	up
A08G063600v1	D08G069800v1	1953.6	-1.76097	0.0805566	-21.86	6.24658e-106	8.59867e-104	down
A05G212700v1	D05G220700v1	63.6075	1.3642	0.387584	3.51974	0.000431964	0.00124632	up
A02G104800v1	D02G119700v1	110.864	1.56909	0.309231	5.07417	3.89186e-07	1.76834e-06	up
A11G004000v1	D11G004000v1	93.2913	1.31899	0.32081	4.11144	3.93204e-05	0.000135828	up
A10G001500v1	D10G001600v1	172.035	-1.7841	0.240598	-7.41528	1.21368e-13	1.06255e-12	down
A03G130200v1	D02G160100v1	100.022	-2.49858	0.354716	-7.04389	1.86946e-12	1.48411e-11	down
A10G053200v1	D10G052100v1	215.303	-1.34526	0.212404	-6.3335	2.39665e-10	1.55102e-09	down
A05G132500v1	D05G133900v1	456.005	1.00964	0.146281	6.90208	5.12459e-12	3.89802e-11	up
A11G245400v1	D11G233600v1	57.4391	-1.05554	0.412452	-2.55917	0.0104921	0.0224062	down
A13G053700v1	D13G057900v1	838.906	-1.17382	0.109595	-10.7106	9.07646e-27	1.68068e-25	down
A11G258100v1	D11G265600v1	1054.94	-1.05942	0.0968714	-10.9364	7.72339e-28	1.4986e-26	down
A08G272300v1	D08G286600v1	610.217	-1.03727	0.125365	-8.27398	1.29556e-16	1.40376e-15	down
A07G194000v1	D03G098100v1	12.0642	7.05301	1.6578	4.25444	2.0957e-05	7.51204e-05	up
A13G085200v1	D13G089900v1	304.608	1.34147	0.178909	7.49804	6.47788e-14	5.79172e-13	up
A04G187400v1	D04G225200v1	81.3587	6.76649	0.890347	7.59983	2.96516e-14	2.71769e-13	up
A13G031300v1	D13G035500v1	246.048	-2.54594	0.215279	-11.8262	2.85732e-32	6.84974e-31	down
A09G118100v1	D09G119700v1	74.5549	-1.12881	0.354191	-3.18701	0.00143751	0.00374033	down
A05G186500v1	D05G194000v1	230.924	1.146	0.203597	5.62879	1.81482e-08	9.72125e-08	up
A11G268800v1	D11G275200v1	51.9205	-1.71793	0.447619	-3.83792	0.000124079	0.000394211	down
A08G281700v1	D08G296200v1	359.795	-1.28091	0.163547	-7.83206	4.79922e-15	4.64576e-14	down
A09G161800v1	D09G160100v1	40.1769	2.92172	0.554025	5.27362	1.33758e-07	6.42714e-07	up
A08G178900v1	D08G199800v1	14.3282	5.83473	1.61685	3.60871	0.00030772	0.000914427	up
A05G023800v1	D05G024700v1	683.288	2.57078	0.135556	18.9647	3.33692e-80	2.80904e-78	up
A11G123500v1	D11G124400v1	90.8575	-1.25276	0.330012	-3.7961	0.000146993	0.000461285	down
A07G261000v1	D07G271400v1	7.48393	3.81565	1.48833	2.56372	0.0103558	0.0221377	up
A13G061700v1	D13G077100v1	586.055	1.1386	0.128443	8.86458	7.67915e-19	9.5118e-18	up
A05G001900v1	D05G002300v1	857.699	-13.1784	1.44614	-9.11282	8.02713e-20	1.05519e-18	down
A11G090900v1	D11G090800v1	19.2611	-1.93217	0.758291	-2.54805	0.0108325	0.0230388	down
A03G219300v1	D02G249700v1	231.858	-1.12032	0.20994	-5.33635	9.48353e-08	4.63731e-07	down
A07G208800v1	D07G218200v1	604.156	1.14522	0.127704	8.96781	3.02481e-19	3.83791e-18	up
A11G164200v1	D11G166000v1	110.898	-1.72743	0.327795	-5.26984	1.36541e-07	6.55225e-07	down
A03G260100v1	D02G290100v1	17.2208	2.76596	0.881479	3.13786	0.00170187	0.00436119	up
A11G038000v1	D11G037600v1	5.02178	5.78871	1.92559	3.0062	0.00264537	0.00648804	up
A07G178500v1	D07G184600v1	207.509	1.58647	0.217245	7.30268	2.82085e-13	2.39581e-12	up
A03G020900v1	D03G196100v1	53.2429	-1.20571	0.453842	-2.65667	0.00789169	0.0173768	down
A13G176100v1	D13G187900v1	60.2699	1.62033	0.406278	3.98824	6.65657e-05	0.000221889	up
A10G045000v1	D10G044800v1	1296.66	-5.2852	0.152406	-34.6785	1.66303e-263	1.17416e-260	down
A09G249200v1	D09G249700v1	2222.5	1.9035	0.0728623	26.1247	1.91229e-150	4.75618e-148	up
A06G169700v1	D06G179500v1	20.9869	-2.19219	0.722663	-3.03349	0.00241745	0.00598673	down
A02G067100v1	D02G074900v1	22.6567	-3.81298	0.845874	-4.50774	6.55223e-06	2.52925e-05	down
A07G108600v1	D07G109000v1	84.5342	-8.38826	1.46922	-5.70931	1.13433e-08	6.22858e-08	down
A07G042700v1	D07G043400v1	574.713	-2.04928	0.136688	-14.9924	8.23847e-51	3.48772e-49	down
A05G121900v1	D05G122700v1	1630.5	-5.75397	0.151621	-37.9495	0	0	down
A02G178600v1	D03G036400v1	111.088	-3.03778	0.336394	-9.03043	1.70991e-19	2.20795e-18	down
A04G041500v1	D05G417900v1	94.803	2.40606	0.342575	7.02345	2.16463e-12	1.70852e-11	up
A01G139900v1	D01G147700v1	119.807	-3.99792	0.383544	-10.4236	1.93453e-25	3.40637e-24	down
A05G180200v1	D05G186700v1	2747.62	-1.52582	0.0652007	-23.4019	4.08405e-121	6.98341e-119	down
A13G060200v1	D13G078700v1	5.95632	-6.00776	1.87068	-3.21154	0.00132026	0.00346596	down
A11G281800v1	D11G286400v1	392.898	-3.21435	0.184222	-17.4483	3.54926e-68	2.31889e-66	down
A12G019800v1	D12G021900v1	52.016	-2.25262	0.469438	-4.79856	1.59812e-06	6.70722e-06	down
A01G119300v1	D01G125300v1	328.571	-1.46656	0.177402	-8.26686	1.37536e-16	1.48655e-15	down
A11G256300v1	D11G264000v1	144.04	-1.96419	0.271667	-7.23015	4.82457e-13	4.02268e-12	down
A10G252000v1	D10G261600v1	46.4602	-3.72165	0.573568	-6.48859	8.66434e-11	5.83856e-10	down
A05G363800v1	D05G361900v1	53.3821	-1.30212	0.453362	-2.87215	0.00407691	0.00961855	down
A09G115600v1	D09G118100v1	217.971	-1.12238	0.207874	-5.39931	6.6897e-08	3.33505e-07	down
A10G108600v1	D10G110800v1	62.3979	-2.52045	0.457614	-5.50781	3.63327e-08	1.86714e-07	down
A10G173700v1	D10G142800v1	405.053	-1.05964	0.153999	-6.88085	5.9496e-12	4.49651e-11	down
A09G030400v1	D09G030100v1	9.894	-6.74043	1.70326	-3.95736	7.57819e-05	0.00025036	down
A08G119100v1	D08G125300v1	57.7663	-3.7338	0.536568	-6.95868	3.43476e-12	2.65548e-11	down
A07G140200v1	D07G141400v1	70.1399	-1.26829	0.40696	-3.1165	0.00183012	0.00465332	down
A05G053200v1	D05G055100v1	281.071	-1.49466	0.187765	-7.96027	1.71662e-15	1.70858e-14	down
A03G082200v1	D03G134400v1	87.0785	-2.03193	0.346586	-5.86271	4.55363e-09	2.61041e-08	down
A12G071700v1	D12G073100v1	9.36636	-4.14	1.36481	-3.03338	0.00241829	0.00598814	down
A05G243000v1	D05G252700v1	12.5613	2.91517	1.05282	2.76891	0.00562449	0.0128299	up
A03G218000v1	D02G248100v1	686.675	-12.8577	1.44699	-8.88584	6.34372e-19	7.90239e-18	down
A10G133600v1	D10G184400v1	448.979	-3.80919	0.194093	-19.6255	9.35819e-86	8.94422e-84	down
A07G148400v1	D07G151000v1	58.2899	-3.40375	0.490525	-6.93898	3.94929e-12	3.03398e-11	down
A11G306000v1	D11G311500v1	2170.72	2.62878	0.0780971	33.6604	2.19668e-248	1.37368e-245	up
A07G176500v1	D07G183000v1	137.035	-1.54529	0.267569	-5.77531	7.68105e-09	4.29413e-08	down
A12G271300v1	D12G280300v1	22.2772	-2.07545	0.678854	-3.05729	0.00223351	0.00557727	down
A02G158200v1	D03G047600v1	151.245	4.74349	0.392067	12.0987	1.07303e-33	2.71507e-32	up
A05G202200v1	D05G209100v1	1283.26	1.59386	0.0894989	17.8088	6.04416e-71	4.16001e-69	up
A06G123600v1	D06G127400v1	99.7476	1.367	0.312634	4.37254	1.22811e-05	4.56671e-05	up
A09G247800v1	D09G248100v1	54.7174	-9.20767	1.49655	-6.15259	7.62283e-10	4.71435e-09	down
A11G221700v1	D11G224700v1	207.383	1.04524	0.232921	4.48752	7.20565e-06	2.76539e-05	up
A01G069900v1	D01G070900v1	335.181	-1.09993	0.169014	-6.50793	7.61933e-11	5.15182e-10	down
A13G119200v1	D13G123000v1	267.674	-1.2461	0.194225	-6.41577	1.40117e-10	9.24272e-10	down
A05G055100v1	D05G056700v1	122.787	-4.33758	0.393304	-11.0286	2.78276e-28	5.55208e-27	down
A01G172800v1	D01G178100v1	104.92	-1.21414	0.31175	-3.89459	9.83652e-05	0.000318904	down
A06G018900v1	D06G018200v1	347.281	2.71614	0.433516	6.26536	3.71955e-10	2.37001e-09	up
A11G114800v1	D11G115500v1	79.2763	1.89298	0.363146	5.21272	1.86093e-07	8.8008e-07	up
A08G130600v1	D08G136500v1	4.52726	5.63886	1.97108	2.86079	0.00422582	0.00992813	up
A11G082800v1	D11G081900v1	133.955	1.24745	0.271394	4.59644	4.29771e-06	1.70468e-05	up
A07G186700v1	D07G194200v1	125.649	1.34244	0.281103	4.77562	1.79159e-06	7.46763e-06	up
A03G155200v1	D02G184800v1	154.083	-1.00794	0.25893	-3.8927	9.91349e-05	0.000321161	down
A11G006400v1	D11G006300v1	95.6649	-1.86457	0.323577	-5.76238	8.29336e-09	4.62228e-08	down
A13G119900v1	D13G124600v1	76.1811	4.75756	0.54016	8.80769	1.27751e-18	1.5682e-17	up
A01G230100v1	D01G244100v1	40.3518	-2.06417	0.50584	-4.08067	4.49064e-05	0.000153837	down
A04G180400v1	D04G217900v1	606.364	-1.25419	0.129686	-9.67098	4.00516e-22	5.9674e-21	down
A05G203100v1	D05G210200v1	63.4775	-3.31727	0.472031	-7.02765	2.10036e-12	1.66019e-11	down
A09G119100v1	D09G120800v1	165.433	-5.32711	0.424628	-12.5454	4.21504e-36	1.1446e-34	down
A03G122300v1	D02G140000v1	67.1732	-3.62741	0.470533	-7.70915	1.26659e-14	1.19285e-13	down
A13G003400v1	D13G005800v1	32.5351	4.99876	0.885303	5.64639	1.63857e-08	8.82246e-08	up
A11G210300v1	D11G213500v1	240.58	-2.22388	0.219696	-10.1225	4.38866e-24	7.24394e-23	down
A10G064600v1	D10G064000v1	13.8845	-3.0446	0.979653	-3.10784	0.00188463	0.00477363	down
A06G082800v1	D06G082600v1	231.546	1.22971	0.207547	5.92496	3.12378e-09	1.82223e-08	up
A09G021200v1	D13G037800v1	61.6774	-9.381	1.48727	-6.30755	2.83495e-10	1.82571e-09	down
A07G011600v1	D07G012100v1	176.97	-2.00862	0.241808	-8.30669	9.84049e-17	1.07367e-15	down
A01G145100v1	D01G157300v1	12.8514	-3.20749	1.0018	-3.20172	0.00136611	0.00357272	down
A10G190700v1	D10G096000v1	79.9275	1.42134	0.352165	4.03601	5.43675e-05	0.000183775	up
A05G189000v1	D05G196300v1	1070.78	1.2534	0.0964662	12.9932	1.33802e-38	3.93091e-37	up
A13G011900v1	D13G015400v1	169.121	4.49775	0.345888	13.0035	1.169e-38	3.44361e-37	up
A02G043900v1	D02G053200v1	221.619	1.35581	0.209092	6.48431	8.9139e-11	5.99934e-10	up
A13G044200v1	D13G047400v1	474.313	3.04977	0.164088	18.5862	4.15382e-77	3.23539e-75	up
A04G135800v1	D04G171500v1	77.6708	1.04242	0.353876	2.94573	0.00322193	0.00776377	up
A03G220500v1	D02G250800v1	655.4	1.41891	0.129023	10.9973	3.93649e-28	7.76898e-27	up
A12G020300v1	D12G022600v1	368.645	1.05073	0.16196	6.48756	8.72355e-11	5.87484e-10	up
A06G038100v1	D06G039000v1	97.0379	1.54703	0.333542	4.6382	3.51461e-06	1.41068e-05	up
A11G071000v1	D11G070700v1	82.7773	1.33613	0.342542	3.90063	9.59444e-05	0.000311517	up
A12G308300v1	D12G317800v1	1228.04	1.28945	0.0900506	14.3191	1.66168e-46	6.17474e-45	up
A03G262400v1	D02G292400v1	1205.66	-1.10604	0.0957384	-11.5527	7.15081e-31	1.61018e-29	down
A08G169400v1	D08G189300v1	3385.91	-3.15627	0.0666479	-47.3574	0	0	down
A05G369100v1	D04G084700v1	25.1718	6.65604	1.54288	4.31405	1.60292e-05	5.85792e-05	up
A03G239600v1	D02G270000v1	58.2047	2.47154	0.463595	5.33125	9.7538e-08	4.76415e-07	up
A11G395500v1	D11G409100v1	4.16688	-5.49432	2.04374	-2.68837	0.00718014	0.0159967	down
A07G161400v1	D07G164500v1	326.906	-1.07095	0.171291	-6.25223	4.04646e-10	2.56859e-09	down
A07G109600v1	D07G110100v1	4.43878	-5.58456	1.98071	-2.81948	0.00481018	0.0111337	down
A11G363500v1	D11G375500v1	236.001	3.68515	0.258072	14.2795	2.93638e-46	1.08562e-44	up
A07G013300v1	D07G013700v1	129.644	1.09841	0.272168	4.03578	5.44212e-05	0.000183899	up
A05G456900v1	D04G009100v1	242.437	-1.35434	0.199449	-6.79044	1.11795e-11	8.20816e-11	down
A03G116300v1	D02G151200v1	684.768	-1.0939	0.118586	-9.22455	2.84765e-20	3.86641e-19	down
A10G024900v1	D10G024700v1	355.096	1.54029	0.165863	9.28647	1.59492e-20	2.18722e-19	up
A07G045000v1	D07G045700v1	261.94	1.38348	0.195627	7.072	1.52715e-12	1.22345e-11	up
A05G243600v1	D05G253400v1	72.3739	3.18678	0.423795	7.51964	5.49293e-14	4.94138e-13	up
A13G138800v1	D13G145400v1	475.026	1.61557	0.156714	10.309	6.41422e-25	1.10542e-23	up
A03G141500v1	D02G183200v1	29.8044	-1.50055	0.576518	-2.60277	0.00924732	0.0200174	down
A08G286200v1	D08G301200v1	45.8589	-6.4931	1.10478	-5.87731	4.16998e-09	2.4018e-08	down
A12G115800v1	D12G120600v1	10.8024	6.89371	1.68173	4.09917	4.14627e-05	0.000142643	up
A11G259700v1	D11G266300v1	4.51875	5.63647	1.97294	2.85689	0.00427817	0.010036	up
A01G101800v1	D01G105200v1	329.517	1.62921	0.173104	9.41171	4.88121e-21	6.87484e-20	up
A11G168100v1	D11G169900v1	206.249	-1.809	0.222326	-8.13669	4.06215e-16	4.22166e-15	down
A05G015000v1	D05G015800v1	20.7621	2.0975	0.730756	2.87031	0.0041007	0.00966426	up
A12G043500v1	D12G033800v1	898.279	1.04595	0.103391	10.1165	4.66758e-24	7.69272e-23	up
A02G066200v1	D02G074000v1	135.112	1.03242	0.273237	3.77848	0.000157787	0.000492229	up
A03G016200v1	D03G201100v1	76.9612	1.39563	0.360322	3.87329	0.000107377	0.000345104	up
A05G078300v1	D05G079800v1	453.929	1.00197	0.144054	6.95552	3.51276e-12	2.71291e-11	up
A10G241000v1	D10G251100v1	91.7873	-1.34762	0.321618	-4.19013	2.78796e-05	9.81978e-05	down
A12G297600v1	D12G306600v1	127.41	2.16575	0.292502	7.40421	1.31937e-13	1.15139e-12	up
A13G212400v1	D13G224900v1	3.04371	5.06466	2.21697	2.28449	0.0223426	0.0436852	up
A04G104400v1	D04G139100v1	43.4715	-2.64149	0.543437	-4.86071	1.16964e-06	5.01467e-06	down
A05G055800v1	D05G057400v1	939.228	-2.53156	0.112451	-22.5126	3.12688e-112	4.75264e-110	down
A03G080700v1	D03G136700v1	335.586	-11.8249	1.45242	-8.14151	3.90365e-16	4.07047e-15	down
A04G014700v1	D05G449000v1	97.1782	10.0626	1.47157	6.83803	8.0291e-12	5.98749e-11	up
A10G162100v1	D10G154700v1	291.259	-1.13977	0.185515	-6.1438	8.05713e-10	4.97031e-09	down
A08G098400v1	D08G105200v1	68.9612	3.06115	0.458142	6.68166	2.36248e-11	1.681e-10	up
A10G118800v1	D10G100300v1	11.753	3.89714	1.16995	3.33103	0.000865252	0.00235813	up
A02G113300v1	D03G114300v1	44.1444	-8.89855	1.50496	-5.91283	3.36277e-09	1.95383e-08	down
A12G051200v1	D12G053000v1	327.219	-1.57457	0.173228	-9.08959	9.94135e-20	1.29825e-18	down
A05G223900v1	D05G232600v1	130.274	1.18677	0.267434	4.4376	9.09681e-06	3.44288e-05	up
A07G179100v1	D07G185300v1	601.957	-12.6676	1.44745	-8.7517	2.1017e-18	2.53723e-17	down
A07G055700v1	D07G056900v1	47.5059	2.06689	0.482465	4.28401	1.83552e-05	6.64582e-05	up
A03G162500v1	D02G194400v1	26.0874	-8.13858	1.56863	-5.18832	2.12201e-07	9.95808e-07	down
A02G106600v1	D02G121500v1	315.793	1.32786	0.17711	7.49735	6.51189e-14	5.81975e-13	up
A13G099400v1	D13G115700v1	21.0334	-2.08242	0.700129	-2.97433	0.00293625	0.00712874	down
A01G221300v1	D01G235200v1	259.898	-1.04597	0.208063	-5.02718	4.97734e-07	2.22597e-06	down
A10G296000v1	D10G308700v1	196.142	2.12587	0.233283	9.11286	8.02395e-20	1.05519e-18	up
A07G043300v1	D07G044100v1	56.4616	6.23252	0.91507	6.81098	9.69386e-12	7.15339e-11	up
A13G024900v1	D13G028900v1	393.227	-1.3504	0.170919	-7.90081	2.77096e-15	2.72575e-14	down
A09G195400v1	D09G194400v1	262.051	1.60654	0.219403	7.32233	2.43693e-13	2.08348e-12	up
A02G142500v1	D03G069100v1	234.228	-1.08799	0.199499	-5.45363	4.9351e-08	2.49456e-07	down
A01G140600v1	D01G148400v1	258.068	-2.8914	0.218781	-13.216	7.09791e-40	2.19424e-38	down
A02G013200v1	D02G012300v1	199.452	1.13523	0.223522	5.07883	3.79762e-07	1.72732e-06	up
A05G131800v1	D05G133000v1	20.0216	-4.68078	1.05194	-4.44966	8.60077e-06	3.26531e-05	down
A10G222100v1	D10G230300v1	54.6435	-1.35261	0.425136	-3.1816	0.00146465	0.00380405	down
A04G126800v1	D04G162600v1	1370.44	-3.12871	0.0996177	-31.4071	1.61631e-216	7.21964e-214	down
A01G144200v1	D01G158000v1	1150.89	-1.05753	0.092581	-11.4227	3.21966e-30	7.09654e-29	down
A12G045600v1	D12G032200v1	77.8674	9.7434	1.4782	6.5914	4.35686e-11	3.02054e-10	up
A01G008700v1	D01G007200v1	36.0283	2.6572	0.570476	4.65786	3.19513e-06	1.28859e-05	up
A10G201600v1	D10G209100v1	305.084	1.17448	0.179508	6.54277	6.03911e-11	4.12155e-10	up
A12G062800v1	D12G064200v1	12.858	-2.90668	0.972234	-2.98969	0.00279264	0.00680878	down
A05G425000v1	D04G043800v1	22.8809	2.60932	0.717002	3.63921	0.000273475	0.000819825	up
A03G221200v1	D02G251500v1	142.868	-1.19185	0.25939	-4.59481	4.33149e-06	1.71683e-05	down
A10G173300v1	D10G143500v1	3.42234	-5.21069	2.18376	-2.38612	0.0170274	0.0343895	down
A11G062300v1	D11G061800v1	30.8636	-5.31755	0.972891	-5.46572	4.61036e-08	2.33906e-07	down
A07G188000v1	D07G196500v1	306.905	-1.18207	0.184997	-6.38967	1.66246e-10	1.09006e-09	down
A06G193400v1	D06G205300v1	34.4725	-8.54201	1.52596	-5.59781	2.17083e-08	1.15267e-07	down
A03G027000v1	D03G189500v1	96.2893	2.34995	0.336901	6.97518	3.05488e-12	2.37271e-11	up
A05G313100v1	D05G319000v1	119.572	-1.56661	0.284338	-5.50968	3.59487e-08	1.84914e-07	down
A02G102000v1	D02G132700v1	293.884	2.7934	0.200958	13.9004	6.29872e-44	2.16421e-42	up
A03G135000v1	D02G164700v1	243.777	2.16457	0.208075	10.4028	2.40739e-25	4.21524e-24	up
A05G278000v1	D05G285400v1	86.0323	1.23432	0.332008	3.71774	0.000201015	0.000616107	up
A03G018200v1	D03G199100v1	73.1255	-1.60475	0.364958	-4.39707	1.09721e-05	4.10438e-05	down
A11G018300v1	D11G018200v1	3.19314	-5.11002	2.17148	-2.35324	0.0186105	0.0372057	down
A03G119900v1	D02G142300v1	260.308	-1.79971	0.196076	-9.17863	4.36615e-20	5.85911e-19	down
A13G131300v1	D13G136500v1	650.213	-2.75511	0.145125	-18.9845	2.29242e-80	1.9523e-78	down
A12G272000v1	D12G281000v1	436.958	1.04393	0.148325	7.03813	1.94842e-12	1.54399e-11	up
A07G086800v1	D07G087300v1	113.113	10.282	1.46696	7.00901	2.40013e-12	1.88421e-11	up
A05G191900v1	D05G198600v1	24.861	-1.48409	0.625319	-2.37333	0.0176283	0.0354688	down
A04G170600v1	D04G207400v1	107.239	2.8174	0.338308	8.32791	8.22801e-17	9.03142e-16	up
A11G222100v1	D11G225400v1	433.715	1.17132	0.148481	7.88865	3.0547e-15	2.9941e-14	up
A13G080400v1	D13G080500v1	755.165	-1.3403	0.126084	-10.6302	2.15707e-26	3.93431e-25	down
A01G130600v1	D01G137200v1	4.27149	5.55513	1.99887	2.77913	0.00545044	0.0124706	up
A04G011100v1	D05G451700v1	22.3124	7.94056	1.56594	5.0708	3.96148e-07	1.79811e-06	up
A10G120300v1	D10G200600v1	875.486	-13.2081	1.44601	-9.13416	6.59167e-20	8.73317e-19	down
A09G014500v1	D09G013900v1	203.217	1.06844	0.222004	4.8127	1.48903e-06	6.28429e-06	up
A03G201200v1	D02G230700v1	118.027	-2.44158	0.306949	-7.95434	1.80089e-15	1.79001e-14	down
A09G046600v1	D09G045900v1	37.7453	-1.46029	0.503004	-2.90313	0.00369448	0.00879786	down
A08G141600v1	D08G159600v1	195.844	-1.88256	0.244537	-7.69847	1.37701e-14	1.29406e-13	down
A07G102400v1	D07G102800v1	157.112	2.59995	0.271024	9.59308	8.5495e-22	1.24334e-20	up
A05G015700v1	D05G016500v1	795.25	-1.50397	0.115175	-13.0581	5.7099e-39	1.70961e-37	down
A07G134000v1	D07G134800v1	69.1779	-5.25748	0.641837	-8.1913	2.58415e-16	2.73365e-15	down
A09G261800v1	D09G262700v1	29.934	-1.51025	0.580827	-2.60017	0.00931772	0.0201499	down
A05G392200v1	D04G074200v1	100.696	5.17462	0.519866	9.95377	2.42818e-23	3.83723e-22	up
A05G246500v1	D05G255700v1	12.842	-2.67135	1.02645	-2.60252	0.00925424	0.0200284	down
A06G181400v1	D06G192500v1	44.3523	-1.50317	0.46994	-3.19865	0.00138072	0.00360533	down
A07G121700v1	D07G122000v1	12.7974	7.13842	1.64792	4.33178	1.47906e-05	5.43492e-05	up
A05G194600v1	D05G201300v1	111.24	1.4808	0.299877	4.93802	7.8921e-07	3.45469e-06	up
A13G169300v1	D13G179700v1	106.292	-1.57634	0.30785	-5.12047	3.04775e-07	1.40257e-06	down
A10G004700v1	D10G004600v1	280.159	-1.14901	0.190298	-6.03795	1.56082e-09	9.34658e-09	down
A12G118000v1	D12G122900v1	116.929	-2.03879	0.297086	-6.86264	6.75989e-12	5.08257e-11	down
A02G060000v1	D02G066700v1	9784.15	1.92343	0.0406602	47.305	0	0	up
A13G177500v1	D13G189300v1	121.701	2.3871	0.310344	7.6918	1.45083e-14	1.36051e-13	up
A06G083400v1	D06G083300v1	68.1188	-2.1425	0.391585	-5.47135	4.46611e-08	2.26797e-07	down
A12G156600v1	D12G164500v1	14.8445	4.86517	1.25956	3.86259	0.000112191	0.000359204	up
A07G254500v1	D07G264800v1	202.812	-1.0916	0.221395	-4.93056	8.19947e-07	3.58207e-06	down
A04G158600v1	D04G194600v1	388.791	-7.10199	2.09468	-3.39049	0.000697676	0.00193561	down
A11G149400v1	D11G149800v1	5.0388	5.79301	1.9249	3.00951	0.00261669	0.00642416	up
A05G123300v1	D05G124100v1	42.4949	-3.83809	0.630092	-6.09132	1.11983e-09	6.81584e-09	down
A10G213100v1	D10G221400v1	172.343	10.8893	1.45886	7.46426	8.37707e-14	7.42905e-13	up
A04G013300v1	D05G450100v1	560.597	-1.96667	0.150371	-13.0787	4.35573e-39	1.30953e-37	down
A11G389400v1	D11G402900v1	1129.06	-1.58095	0.0961682	-16.4395	9.98164e-61	5.39427e-59	down
A12G076100v1	D12G077700v1	84.1316	-1.18901	0.334342	-3.55627	0.000376163	0.0010995	down
A11G094000v1	D11G093800v1	14.9833	2.33591	0.881337	2.65042	0.00803917	0.0176731	up
A09G045100v1	D09G044300v1	626.946	1.81397	0.129121	14.0486	7.85776e-45	2.75172e-43	up
A05G327300v1	D05G331300v1	26.0294	-1.97859	0.630974	-3.13578	0.001714	0.00438764	down
A12G053000v1	D12G055300v1	164.48	-1.63825	0.243974	-6.71484	1.88273e-11	1.35195e-10	down
A09G076000v1	D09G076300v1	145.531	-9.17465	1.45637	-6.29967	2.98278e-10	1.91715e-09	down
A06G207100v1	D06G218800v1	814.712	1.19738	0.109609	10.9241	8.84018e-28	1.71074e-26	up
A05G362900v1	D05G363300v1	34.5436	-8.54465	1.52088	-5.61822	1.92939e-08	1.02996e-07	down
A05G370300v1	D04G085400v1	9.63879	-3.10786	1.14836	-2.70634	0.00680295	0.0152261	down
A10G147900v1	D10G166600v1	133.88	-2.21925	0.28564	-7.7694	7.88605e-15	7.51751e-14	down
A08G046400v1	D08G051500v1	165.756	-2.09565	0.250123	-8.3785	5.36055e-17	5.94962e-16	down
A03G166000v1	D02G196700v1	696.839	-1.36148	0.122021	-11.1577	6.56322e-29	1.35646e-27	down
A10G016700v1	D10G015800v1	146.165	-3.54498	0.330159	-10.7372	6.81033e-27	1.26535e-25	down
A02G185700v1	D03G029800v1	91.8811	-4.3568	0.455692	-9.56084	1.16803e-21	1.68411e-20	down
A07G189000v1	D07G197200v1	101.525	1.03271	0.302539	3.41347	0.000641408	0.00179108	up
A12G230100v1	D12G240100v1	167.392	-1.01805	0.236324	-4.30784	1.64859e-05	6.01577e-05	down
A10G058300v1	D10G057400v1	10.582	3.72222	1.21949	3.05226	0.00227123	0.00566191	up
A09G197500v1	D09G196700v1	184.455	1.31728	0.230602	5.71233	1.1144e-08	6.12529e-08	up
A07G054700v1	D07G056000v1	55.0964	-2.6521	0.481863	-5.50384	3.71615e-08	1.90704e-07	down
A02G158700v1	D03G049000v1	97.0721	1.01962	0.323761	3.14931	0.00163659	0.00420769	up
A01G122100v1	D01G128300v1	125.544	-1.33402	0.279128	-4.77925	1.75952e-06	7.34094e-06	down
A04G128800v1	D04G164900v1	85.43	-9.85041	1.4794	-6.65837	2.76889e-11	1.95619e-10	down
A12G088600v1	D12G088900v1	220.215	-1.62648	0.216953	-7.49692	6.53357e-14	5.83674e-13	down
A10G232300v1	D10G242200v1	50.0426	1.38925	0.434003	3.20101	0.00136946	0.00358018	up
A08G161800v1	D08G181500v1	1583.01	1.09771	0.0962677	11.4026	4.05618e-30	8.88665e-29	up
A11G387000v1	D11G401300v1	274.375	1.35035	0.186478	7.24133	4.44306e-13	3.71307e-12	up
A08G117600v1	D08G128300v1	53.6912	-3.7254	0.531175	-7.01352	2.32403e-12	1.82774e-11	down
A10G097000v1	D10G123400v1	189.627	-1.36699	0.232653	-5.87568	4.21106e-09	2.42355e-08	down
A08G057600v1	D08G062700v1	13.0362	7.16524	1.64645	4.35192	1.34948e-05	4.9909e-05	up
A11G298000v1	D11G304900v1	102.103	1.55504	0.306909	5.06678	4.04602e-07	1.83534e-06	up
A12G074300v1	D12G076100v1	457.416	-1.99857	0.151869	-13.1598	1.49423e-39	4.52966e-38	down
A02G112500v1	D03G115000v1	627.708	2.79554	0.138066	20.2478	3.71125e-91	3.84967e-89	up
A13G222900v1	D13G235200v1	33.6062	-1.32266	0.555796	-2.37975	0.0173244	0.0349119	down
A10G150300v1	D10G165000v1	342.219	-2.41515	0.18539	-13.0274	8.55182e-39	2.5328e-37	down
A11G275800v1	D11G280900v1	152.26	-2.04592	0.261993	-7.80909	5.76016e-15	5.53922e-14	down
A13G056800v1	D13G082800v1	67.6465	1.3863	0.393047	3.52706	0.000420196	0.00121635	up
A02G050500v1	D02G057800v1	9.09253	-6.61964	1.73753	-3.8098	0.00013908	0.000437865	down
A06G095500v1	D06G096800v1	84.4153	1.59238	0.344097	4.62772	3.69708e-06	1.47958e-05	up
A01G112900v1	D01G117100v1	23.9744	1.61332	0.651227	2.47735	0.0132362	0.027525	up
A03G003900v1	D03G216900v1	271.984	3.33755	0.233982	14.2642	3.66013e-46	1.34411e-44	up
A08G172500v1	D08G192700v1	254.666	1.31722	0.200608	6.56615	5.16334e-11	3.55266e-10	up
A07G246600v1	D07G255900v1	88.5298	-1.86115	0.336415	-5.53229	3.16074e-08	1.63893e-07	down
A07G009500v1	D06G084000v1	679.13	4.11571	0.163746	25.1347	2.07864e-139	4.54952e-137	up
A10G253200v1	D10G263000v1	36.7201	-1.71612	0.522415	-3.28498	0.00101988	0.00274295	down
A01G256400v1	D08G139500v1	426.237	12.1959	1.4494	8.41444	3.94769e-17	4.41734e-16	up
A05G432500v1	D04G034900v1	59.2614	-3.783	0.517836	-7.30539	2.76471e-13	2.35387e-12	down
A02G120500v1	D03G107700v1	2339.97	-1.0326	0.0665407	-15.5183	2.60915e-54	1.20732e-52	down
A08G122600v1	D08G149100v1	46.7123	-1.21455	0.453497	-2.67818	0.00740245	0.0164368	down
A09G013500v1	D09G013000v1	729.942	2.47885	0.130576	18.984	2.31357e-80	1.96268e-78	up
A11G316700v1	D11G325700v1	155.094	-1.25621	0.255529	-4.9161	8.82867e-07	3.84085e-06	down
A05G328300v1	D05G332000v1	4.96123	-5.7441	1.9411	-2.95921	0.00308433	0.00745765	down
A03G136400v1	D02G165400v1	40.5039	1.4477	0.484856	2.98583	0.00282812	0.00688686	up
A10G297000v1	D10G310500v1	525.478	-1.68231	0.143903	-11.6906	1.42374e-31	3.32922e-30	down
A09G158200v1	D09G155800v1	123.761	-1.02576	0.274322	-3.73924	0.000184575	0.000569627	down
A08G254600v1	D08G269500v1	74.8006	1.37814	0.366677	3.75845	0.000170968	0.000530474	up
A09G189000v1	D09G187800v1	105.213	6.39608	0.702591	9.10357	8.7409e-20	1.1449e-18	up
A02G070800v1	D02G078600v1	266.427	2.08446	0.208304	10.0068	1.42221e-23	2.2821e-22	up
A03G014300v1	D03G205700v1	231.904	1.03572	0.200505	5.16556	2.39715e-07	1.11726e-06	up
A07G145800v1	D07G244700v1	14.3527	3.41041	0.98005	3.47984	0.000501715	0.0014315	up
A08G264500v1	D08G279100v1	217.132	-1.4803	0.216052	-6.85161	7.3021e-12	5.47333e-11	down
A02G079100v1	D02G088200v1	26.4944	1.95678	0.621908	3.14641	0.00165287	0.00424456	up
A08G127400v1	D08G140600v1	17.3181	-7.54805	1.5969	-4.7267	2.282e-06	9.37604e-06	down
A12G023400v1	D12G025600v1	257.186	-3.97999	0.256239	-15.5324	2.09537e-54	9.73704e-53	down
A09G047200v1	D09G046600v1	3.70136	-5.32234	2.07182	-2.56892	0.0102015	0.0218474	down
A09G077700v1	D09G078600v1	530.618	-2.51161	0.147858	-16.9867	1.03095e-64	6.28534e-63	down
A10G179500v1	D10G136900v1	918.542	1.41266	0.105269	13.4195	4.64729e-41	1.48273e-39	up
A12G002900v1	D12G003200v1	143.237	-10.5967	1.46362	-7.24004	4.48557e-13	3.74716e-12	down
A02G184800v1	D03G030900v1	20.4756	-7.79017	1.57272	-4.9533	7.29652e-07	3.20552e-06	down
A11G084000v1	D11G083300v1	321.979	-1.42956	0.181307	-7.88476	3.15129e-15	3.08325e-14	down
A08G030400v1	D08G031400v1	39.5451	-2.47755	0.537147	-4.61243	3.97982e-06	1.58519e-05	down
A05G381900v1	D04G097300v1	787.464	-1.74516	0.116141	-15.0262	4.94673e-51	2.1064e-49	down
A02G145400v1	D03G072500v1	12.8579	-7.11852	1.64594	-4.32489	1.52605e-05	5.59287e-05	down
A06G116500v1	D06G120300v1	85.2154	-1.29691	0.334964	-3.87178	0.000108042	0.000347037	down
A02G127000v1	D03G082100v1	128.588	1.07986	0.274179	3.93853	8.1984e-05	0.000269589	up
A02G017500v1	D02G016900v1	88.9446	5.65692	0.632445	8.94452	3.73567e-19	4.71255e-18	up
A12G147800v1	D12G155600v1	585.5	1.0093	0.127044	7.94447	1.95017e-15	1.93751e-14	up
A10G226200v1	D10G234900v1	9.77928	6.75048	1.70815	3.95192	7.75257e-05	0.000255774	up
A01G184400v1	D01G193400v1	143.732	1.8386	0.272189	6.75485	1.42982e-11	1.03934e-10	up
A10G212600v1	D10G222100v1	162.287	3.87203	0.31219	12.4028	2.52454e-35	6.68941e-34	up
A08G143300v1	D08G161400v1	79.5101	-1.17641	0.344543	-3.41441	0.000639192	0.00178535	down
A05G090200v1	D05G091200v1	189.025	-2.77312	0.250533	-11.0689	1.7761e-28	3.58612e-27	down
A11G108700v1	D11G109600v1	60.8149	-1.66388	0.402281	-4.13612	3.53229e-05	0.000122561	down
A03G045400v1	D03G170500v1	1104.24	6.38178	0.218094	29.2616	3.19997e-188	1.20755e-185	up
A07G105600v1	D07G105800v1	931.756	1.65593	0.105252	15.7331	8.97714e-56	4.29001e-54	up
A12G053800v1	D12G056000v1	15.8879	-2.78171	0.867485	-3.20663	0.00134298	0.00351896	down
A03G036800v1	D03G180100v1	130.619	-4.49655	0.40088	-11.2167	3.37656e-29	7.07203e-28	down
A09G234300v1	D09G233700v1	15.8093	3.55945	0.947514	3.75662	0.000172224	0.000534146	up
A12G253300v1	D12G263200v1	6.65817	-6.16953	1.81731	-3.39486	0.000686628	0.00190786	down
A03G126700v1	D02G156500v1	239.281	2.24334	0.213734	10.4959	9.01805e-26	1.59691e-24	up
A07G068500v1	D07G069500v1	60.1308	2.57581	0.432587	5.95444	2.60965e-09	1.53212e-08	up
A02G081200v1	D02G090900v1	735.452	-4.92745	0.184742	-26.6721	9.92541e-157	2.58616e-154	down
A02G091600v1	D02G102100v1	33.3582	-6.02694	1.13041	-5.33162	9.73395e-08	4.75658e-07	down
A13G026600v1	D13G030700v1	1037.99	1.03372	0.0976082	10.5905	3.29651e-26	5.96287e-25	up
A13G123800v1	D13G128300v1	36.4096	1.73403	0.533637	3.24945	0.00115628	0.00307653	up
A13G094800v1	D13G094700v1	524.296	-6.69045	0.345866	-19.3441	2.28749e-83	2.09483e-81	down
A01G084200v1	D01G085800v1	106.646	2.49932	0.330893	7.55326	4.24494e-14	3.84557e-13	up
A10G285200v1	D10G287700v1	226.342	9.8385	1.4498	6.78611	1.15199e-11	8.43548e-11	up
A09G099500v1	D09G102100v1	92.8117	-1.5272	0.357205	-4.27543	1.90771e-05	6.88215e-05	down
A01G062000v1	D01G063400v1	62.9914	3.337	0.463469	7.20006	6.0188e-13	4.97859e-12	up
A01G092800v1	D01G095400v1	635.301	1.17905	0.123248	9.56654	1.10541e-21	1.59591e-20	up
A03G247000v1	D02G276900v1	563.532	-1.19675	0.136645	-8.75811	1.98546e-18	2.40087e-17	down
A09G036400v1	D09G037700v1	54.7743	-6.16064	0.926158	-6.65183	2.89476e-11	2.04182e-10	down
A04G139200v1	D04G175200v1	3.51269	5.27321	2.10287	2.50763	0.0121544	0.0255204	up
A12G065900v1	D12G067200v1	142.365	2.10599	0.296962	7.0918	1.32383e-12	1.068e-11	up
A11G387600v1	D11G402000v1	5.96344	-6.0093	1.87839	-3.19917	0.00137822	0.00359923	down
A03G256400v1	D02G286500v1	8.40163	-5.02092	1.72957	-2.903	0.00369612	0.00880079	down
A10G139100v1	D10G178500v1	43.7002	-8.88377	1.50447	-5.90493	3.52793e-09	2.04437e-08	down
A11G328600v1	D11G337600v1	24.1369	8.05345	1.55316	5.1852	2.15781e-07	1.01158e-06	up
A10G129600v1	D10G188100v1	84.3111	1.09683	0.347611	3.15533	0.00160317	0.00412808	up
A13G076900v1	D07G007800v1	65.4688	-2.78429	0.43333	-6.42533	1.31581e-10	8.70063e-10	down
A09G253300v1	D09G254500v1	174.852	1.76548	0.241871	7.29925	2.89381e-13	2.45455e-12	up
A09G200200v1	D09G200100v1	11.198	-2.67129	1.05297	-2.5369	0.0111838	0.0236953	down
A10G019500v1	D10G018800v1	5.92075	-6.00011	1.85873	-3.22808	0.00124625	0.00329031	down
A01G135500v1	D01G142900v1	1529.39	1.14128	0.0832682	13.7061	9.3397e-43	3.10666e-41	up
A11G215000v1	D11G218800v1	65.1486	-1.72495	0.412052	-4.18624	2.83616e-05	9.9831e-05	down
A01G245600v1	D01G259000v1	21.583	-1.81733	0.680737	-2.66965	0.00759303	0.0168173	down
A10G070500v1	D10G069300v1	1645.9	10.7015	0.72504	14.7599	2.65679e-49	1.08084e-47	up
A06G087900v1	D06G087900v1	29.9465	2.10091	0.613765	3.42299	0.000619353	0.00173503	up
A04G040900v1	D05G422700v1	293.496	2.0909	0.189047	11.0602	1.9564e-28	3.93927e-27	up
A13G141600v1	D13G149100v1	75.2936	2.24565	0.382343	5.87338	4.27001e-09	2.45554e-08	up
A05G127400v1	D05G128700v1	141.941	-1.0337	0.259718	-3.98009	6.88889e-05	0.000228936	down
A13G057200v1	D13G083500v1	703.178	-1.41245	0.121045	-11.6688	1.84037e-31	4.27148e-30	down
A11G191500v1	D11G194800v1	204.099	2.24318	0.23094	9.71327	2.64718e-22	3.98205e-21	up
A12G119200v1	D12G124300v1	10.5337	2.60181	1.05999	2.45457	0.0141055	0.0290758	up
A05G386600v1	D04G103900v1	3.46503	-5.22664	2.11074	-2.47622	0.0132782	0.0276046	down
A04G031500v1	D05G432300v1	12.7533	2.92803	0.975844	3.00051	0.00269526	0.00659857	up
A05G136200v1	D05G138300v1	50.8238	-1.88316	0.454754	-4.14106	3.45705e-05	0.000120064	down
A08G244400v1	D08G259000v1	255.644	-1.25322	0.203997	-6.14334	8.08045e-10	4.98329e-09	down
A03G235400v1	D02G265700v1	18.5822	4.59173	1.05351	4.3585	1.30955e-05	4.85387e-05	up
A05G048200v1	D05G050300v1	19.0343	2.30709	0.758347	3.04227	0.00234803	0.00583661	up
A12G005100v1	D12G005500v1	27.8968	8.26239	1.53875	5.36955	7.89323e-08	3.89711e-07	up
A11G149600v1	D11G150000v1	11.1725	-3.79702	1.22677	-3.09513	0.0019673	0.00496005	down
A07G225100v1	D07G234200v1	36.9066	3.26605	0.638434	5.11572	3.12549e-07	1.43532e-06	up
A06G216100v1	D06G231800v1	206.667	-4.8773	0.344402	-14.1617	1.58223e-45	5.70515e-44	down
A05G018800v1	D05G019500v1	13.5294	-5.72124	1.63804	-3.49274	0.0004781	0.00136966	down
A11G118300v1	D11G119200v1	77.5186	-1.19264	0.36358	-3.28026	0.00103711	0.00278587	down
A11G179200v1	D11G182000v1	224.442	-1.04076	0.20524	-5.07094	3.95856e-07	1.79716e-06	down
A03G054300v1	D03G161600v1	630.579	1.0917	0.128073	8.52409	1.54022e-17	1.7622e-16	up
A08G001800v1	D08G001700v1	60.5476	3.01369	0.452469	6.66056	2.72787e-11	1.92783e-10	up
A05G399400v1	D04G067600v1	320.642	-1.28711	0.175592	-7.33009	2.30007e-13	1.97186e-12	down
A01G258700v1	D01G272900v1	1859	-14.2945	1.44434	-9.89689	4.29442e-23	6.71372e-22	down
A08G032700v1	D08G033700v1	96.6091	-1.11888	0.31384	-3.56513	0.000363674	0.00106527	down
A03G151900v1	D02G178900v1	192.64	-1.57073	0.229842	-6.83398	8.25926e-12	6.14539e-11	down
A05G027100v1	D05G029100v1	65.0045	-1.25764	0.411247	-3.05811	0.00222738	0.0055645	down
A11G095200v1	D11G095200v1	92.6172	-1.01658	0.318731	-3.18947	0.00142532	0.00371203	down
A12G214000v1	D12G222300v1	135.254	2.12889	0.288703	7.37397	1.65626e-13	1.4351e-12	up
A02G162100v1	D03G052400v1	153.255	3.0008	0.29513	10.1677	2.76343e-24	4.60298e-23	up
A10G071400v1	D10G070400v1	274.368	1.07729	0.18672	5.76954	7.949e-09	4.43826e-08	up
A05G137700v1	D05G139900v1	3683.55	-1.49944	0.124416	-12.0518	1.89769e-33	4.7577e-32	down
A05G116800v1	D05G117500v1	66.2536	1.03282	0.37427	2.75955	0.00578809	0.0131674	up
A05G173800v1	D05G180300v1	23.5285	-2.17427	0.666918	-3.26018	0.00111343	0.00296972	down
A07G257200v1	D07G267800v1	9.73845	3.1594	1.19847	2.63618	0.00838444	0.0183363	up
A13G027300v1	D13G031400v1	83.3655	-2.03073	0.365153	-5.5613	2.67771e-08	1.40242e-07	down
A12G170100v1	D12G177100v1	3.70136	-5.32234	2.07182	-2.56892	0.0102015	0.0218474	down
A10G246300v1	D10G256400v1	125.241	-2.59386	0.321591	-8.0657	7.28173e-16	7.44744e-15	down
A10G194600v1	D10G202000v1	314.501	1.57511	0.177008	8.89852	5.65943e-19	7.08626e-18	up
A03G004800v1	D03G216000v1	9.53235	3.11807	1.15262	2.70522	0.00682602	0.0152731	up
A04G101000v1	D04G134300v1	17.6736	-6.11692	1.6071	-3.80617	0.000141134	0.000443757	down
A05G069300v1	D05G071100v1	129.753	1.81769	0.279878	6.49457	8.327e-11	5.61816e-10	up
A12G024200v1	D12G026300v1	148.84	-1.51274	0.274205	-5.51681	3.45202e-08	1.77859e-07	down
A09G047800v1	D09G047300v1	702.273	-4.99979	0.413523	-12.0907	1.18248e-33	2.9851e-32	down
A08G040400v1	D08G044900v1	576.961	-1.02453	0.128662	-7.96301	1.67901e-15	1.67343e-14	down
A11G055900v1	D11G055900v1	152.766	1.28333	0.254593	5.04069	4.63852e-07	2.08381e-06	up
A11G001300v1	D11G001500v1	401.647	-1.31436	0.159245	-8.25366	1.53621e-16	1.6498e-15	down
A11G369400v1	D11G381900v1	657.373	1.18243	0.121212	9.75501	1.75579e-22	2.66683e-21	up
A06G128400v1	D06G133800v1	580.632	1.66798	0.14066	11.8583	1.94907e-32	4.71373e-31	up
A03G024400v1	D03G192000v1	917.657	-1.20811	0.106436	-11.3505	7.37157e-30	1.59114e-28	down
A03G098500v1	D02G126800v1	2353.4	1.31618	0.067123	19.6084	1.30965e-85	1.23553e-83	up
A02G153800v1	D03G063600v1	576.924	12.6326	1.44783	8.72524	2.65621e-18	3.18556e-17	up
A12G255600v1	D12G265500v1	572.666	-1.04691	0.137445	-7.61692	2.59792e-14	2.39313e-13	down
A05G271900v1	D05G279500v1	5.29786	4.3495	1.88229	2.31075	0.0208468	0.0411425	up
A02G093700v1	D02G104400v1	21.0421	7.85612	1.57535	4.98689	6.13575e-07	2.71793e-06	up
A08G058600v1	D08G064100v1	621.291	-6.61224	0.311507	-21.2266	5.4211e-100	6.78009e-98	down
A04G185400v1	D04G222700v1	89.9883	-3.55783	0.414484	-8.58375	9.18334e-18	1.06799e-16	down
A10G028500v1	D10G028400v1	490.95	1.15404	0.141551	8.15286	3.55419e-16	3.71316e-15	up
A11G206800v1	D11G209900v1	68.2853	-4.3016	0.895808	-4.80192	1.57148e-06	6.60424e-06	down
A12G172100v1	D12G178700v1	13.0626	3.25345	1.01232	3.21386	0.00130966	0.00344111	up
A09G199800v1	D09G199700v1	340.07	-1.28389	0.171463	-7.4879	6.99824e-14	6.23658e-13	down
A04G193700v1	D04G232300v1	196.749	1.50049	0.221423	6.77658	1.2305e-11	8.98931e-11	up
A01G152500v1	D01G162100v1	3.44369	-5.21877	2.1199	-2.46181	0.013824	0.0285762	down
A02G071700v1	D02G080400v1	116.889	1.69001	0.28926	5.84253	5.14138e-09	2.93198e-08	up
A02G040600v1	D02G049600v1	33.1316	4.41897	0.763677	5.78643	7.18961e-09	4.03278e-08	up
A06G033200v1	D06G034200v1	350.916	1.49685	0.168404	8.88847	6.19581e-19	7.72693e-18	up
A01G095100v1	D01G097700v1	515.33	-2.44401	0.148661	-16.4401	9.87787e-61	5.35141e-59	down
A02G026700v1	D02G027200v1	19.487	-1.8437	0.766545	-2.40521	0.0161634	0.0328781	down
A08G123900v1	D11G229100v1	27.0184	-8.18943	1.55053	-5.28169	1.27998e-07	6.16392e-07	down
A13G057900v1	D13G084200v1	623.423	1.00363	0.123282	8.14088	3.92416e-16	4.08796e-15	up
A08G164600v1	D08G184500v1	2611.61	-1.0383	0.0632398	-16.4184	1.41257e-60	7.57766e-59	down
A01G073300v1	D01G075300v1	41.2888	1.30167	0.534178	2.43676	0.0148194	0.0303758	up
A12G068200v1	D12G069500v1	76.9164	-2.22393	0.377916	-5.88473	3.98695e-09	2.30001e-08	down
A03G226900v1	D02G256800v1	31.2437	-8.40026	1.53758	-5.46329	4.67381e-08	2.3696e-07	down
A06G226900v1	D06G241400v1	84.3764	-2.14038	0.361167	-5.92628	3.0987e-09	1.80905e-08	down
A04G119400v1	D04G155100v1	424.972	1.84817	0.155632	11.8753	1.59065e-32	3.85543e-31	up
A03G205300v1	D02G234400v1	12.4364	2.21086	0.980352	2.25517	0.0241229	0.0466741	up
A11G170500v1	D11G173100v1	349.234	2.21325	0.177019	12.5029	7.19937e-36	1.94775e-34	up
A11G045300v1	D11G044700v1	6.5564	6.17268	1.82548	3.38139	0.000721189	0.00199276	up
A06G077300v1	D12G079100v1	12.3114	7.08233	1.65387	4.28227	1.84992e-05	6.69024e-05	up
A05G462400v1	D04G004300v1	205.923	1.05808	0.225388	4.69447	2.67299e-06	1.08824e-05	up
A13G195200v1	D13G206200v1	14.8558	-4.84009	1.26314	-3.83178	0.000127218	0.000403188	down
A05G431900v1	D04G036300v1	94.0701	-1.6803	0.327055	-5.13767	2.78166e-07	1.28769e-06	down
A03G152600v1	D02G179600v1	217.769	-4.61406	0.313149	-14.7344	3.87757e-49	1.57164e-47	down
A11G318200v1	D11G327100v1	12.9201	-2.65694	0.957081	-2.77609	0.00550177	0.0125734	down
A09G265400v1	D09G266400v1	478.999	-2.31443	0.153148	-15.1124	1.34076e-51	5.76525e-50	down
A13G081300v1	D13G085800v1	276.802	1.06152	0.187858	5.65064	1.5985e-08	8.6216e-08	up
A10G280100v1	D10G302300v1	185.059	-5.9145	0.467666	-12.6468	1.16478e-36	3.2027e-35	down
A07G029100v1	D07G029300v1	340.518	1.60991	0.175659	9.16498	4.95562e-20	6.62171e-19	up
A04G029300v1	D05G434600v1	1050.96	1.87837	0.100458	18.6981	5.13019e-78	4.11298e-76	up
A13G094300v1	D13G095400v1	43.5887	-1.15349	0.489296	-2.35744	0.0184016	0.0368363	down
A05G019900v1	D05G020600v1	5.0388	5.79301	1.9249	3.00951	0.00261669	0.00642416	up
A04G153000v1	D04G188700v1	96.0552	-1.26651	0.320864	-3.9472	7.90704e-05	0.000260438	down
A06G053400v1	D06G055000v1	375.663	-1.07013	0.159201	-6.72189	1.79381e-11	1.29063e-10	down
A05G051500v1	D05G052600v1	415.902	1.33301	0.159802	8.34159	7.3296e-17	8.07769e-16	up
A10G207500v1	D10G215500v1	350.476	1.13001	0.165923	6.81048	9.7274e-12	7.17572e-11	up
A11G181000v1	D11G184300v1	172.785	-1.44377	0.242602	-5.95116	2.66245e-09	1.56144e-08	down
A03G052200v1	D03G163900v1	60.614	-1.09115	0.39017	-2.7966	0.00516436	0.0118831	down
A03G021100v1	D03G195900v1	60.421	-3.03617	0.478807	-6.34112	2.28095e-10	1.47746e-09	down
A11G088100v1	D11G087900v1	12.9278	-2.23336	0.913561	-2.44468	0.0144982	0.0297704	down
A09G036800v1	D09G038400v1	2.96393	-5.00163	2.20182	-2.27159	0.023111	0.0450027	down
A03G075300v1	D03G141500v1	459.404	1.6569	0.154119	10.7508	5.87645e-27	1.09649e-25	up
A09G016500v1	D09G016000v1	621.717	1.0845	0.124391	8.71844	2.8206e-18	3.37532e-17	up
A05G295900v1	D05G303000v1	151.623	-6.4106	0.594338	-10.7861	4.00295e-27	7.50751e-26	down
A10G112500v1	D10G106300v1	267.992	-3.42249	0.241954	-14.1452	1.99921e-45	7.19682e-44	down
A05G330500v1	D05G335000v1	65.8685	-1.51439	0.392141	-3.86185	0.00011253	0.000360236	down
A01G249000v1	D01G262400v1	1334.34	-6.3328	0.196896	-32.1632	5.76982e-227	2.87009e-224	down
A08G090800v1	D08G096100v1	733.921	-1.0408	0.12176	-8.54798	1.25263e-17	1.43842e-16	down
A10G010500v1	D10G009900v1	311.422	1.338	0.186086	7.19026	6.46687e-13	5.32507e-12	up
A07G093100v1	D07G093700v1	366.465	-8.50526	0.736427	-11.5494	7.437e-31	1.6729e-29	down
A12G246500v1	D12G256600v1	139.446	3.43037	0.323288	10.6109	2.65306e-26	4.81889e-25	up
A03G139000v1	D02G168400v1	184.073	3.85347	0.56342	6.83943	7.95096e-12	5.93125e-11	up
A05G208600v1	D05G216200v1	1065.46	-1.80462	0.105336	-17.132	8.56948e-66	5.34359e-64	down
A01G108100v1	D01G111600v1	6.06188	6.05927	1.85845	3.26039	0.00111259	0.00296785	up
A05G146900v1	D05G150600v1	27.751	-2.17906	0.617108	-3.53108	0.000413861	0.00119992	down
A04G176400v1	D04G213800v1	32.026	5.39837	0.975462	5.53416	3.12718e-08	1.62229e-07	up
A08G238300v1	D08G252800v1	46.9225	-2.26601	0.49633	-4.56553	4.98241e-06	1.95851e-05	down
A05G238800v1	D05G248200v1	143.987	-3.77527	0.329833	-11.446	2.46294e-30	5.43411e-29	down
A06G172400v1	D06G185000v1	5.18332	-5.80812	1.91095	-3.03938	0.00237062	0.00588674	down
A08G247600v1	D08G262400v1	8.63795	-5.06234	1.72233	-2.93924	0.00329023	0.00791355	down
A04G007500v1	D05G455400v1	451.816	-1.58703	0.151648	-10.4652	1.24764e-25	2.20396e-24	down
A04G164700v1	D04G201000v1	1144.3	1.74699	0.0975621	17.9064	1.05091e-71	7.39587e-70	up
A01G055500v1	D01G056800v1	23.1564	7.99343	1.55818	5.12999	2.89752e-07	1.33709e-06	up
A12G173300v1	D12G179400v1	114.018	1.54377	0.293395	5.26176	1.42686e-07	6.83362e-07	up
A10G248900v1	D10G258700v1	41.861	3.26496	0.563981	5.78913	7.07518e-09	3.97266e-08	up
A03G063300v1	D03G152700v1	5.46234	-5.88278	1.90676	-3.08522	0.00203403	0.00511593	down
A09G055800v1	D09G049600v1	88.3003	-1.62568	0.332555	-4.88845	1.01633e-06	4.38921e-06	down
A05G332100v1	D05G336600v1	3.51269	5.27321	2.10287	2.50763	0.0121544	0.0255204	up
A08G156300v1	D08G175600v1	18.0664	-6.14758	1.58363	-3.88195	0.000103624	0.000333875	down
A01G065200v1	D01G066400v1	182.489	-1.07021	0.231056	-4.63184	3.62434e-06	1.45339e-05	down
A06G188300v1	D06G200500v1	1314.43	1.65742	0.0894223	18.5348	1.08234e-76	8.34124e-75	up
A09G088100v1	D09G090000v1	225.128	-1.63375	0.212347	-7.6938	1.42823e-14	1.3399e-13	down
A07G257800v1	D04G017800v1	47.0464	9.01701	1.51066	5.96891	2.38846e-09	1.40754e-08	up
A03G195300v1	D02G225500v1	11.7714	2.79205	1.00152	2.78781	0.00530655	0.0121783	up
A11G036100v1	D11G035800v1	1714.23	1.1222	0.0766127	14.6477	1.39453e-48	5.56971e-47	up
A06G251500v1	D06G264500v1	3.92344	-5.40742	2.06971	-2.61265	0.00898432	0.0195021	down
A05G272900v1	D05G280600v1	357.729	1.08678	0.16487	6.59176	4.34652e-11	3.01433e-10	up
A01G074100v1	D01G076000v1	47.388	1.66211	0.458891	3.62202	0.000292316	0.000872008	up
A03G172700v1	D02G203100v1	39.4341	-1.59202	0.499813	-3.18523	0.0014464	0.00376023	down
A05G240300v1	D05G249800v1	363.921	-1.40686	0.173526	-8.10751	5.16662e-16	5.33405e-15	down
A09G290700v1	D09G288800v1	41.337	-8.80313	1.5115	-5.82412	5.74143e-09	3.25382e-08	down
A11G391500v1	D11G405000v1	57.5946	3.96644	0.536356	7.39516	1.41243e-13	1.23016e-12	up
A04G077800v1	D10G061500v1	235.026	2.16039	0.211168	10.2307	1.44496e-24	2.45162e-23	up
A02G150200v1	D03G075500v1	345.591	-1.50394	0.171343	-8.77737	1.67337e-18	2.03699e-17	down
A06G119100v1	D06G123300v1	1946.71	2.76946	0.0815274	33.9696	6.25663e-253	4.02761e-250	up
A12G214700v1	D12G223000v1	67.8828	-2.397	0.405072	-5.91748	3.26917e-09	1.90349e-08	down
A08G291900v1	D08G307200v1	2160.32	-1.08553	0.0697003	-15.5743	1.088e-54	5.08824e-53	down
A04G166400v1	D04G202600v1	53.8889	-6.13558	0.918118	-6.68278	2.34451e-11	1.66876e-10	down
A12G244900v1	D12G255000v1	131.173	-2.2011	0.292366	-7.52857	5.13007e-14	4.62446e-13	down
A06G027200v1	D06G026900v1	5.92786	-6.00164	1.85774	-3.23062	0.00123522	0.00326592	down
A08G258700v1	D08G273600v1	473.255	-2.55122	0.163376	-15.6156	5.70246e-55	2.70151e-53	down
A02G019900v1	D02G019900v1	111.044	1.66265	0.299135	5.55821	2.72553e-08	1.42644e-07	up
A05G174700v1	D05G181000v1	91.5726	-1.87709	0.339433	-5.53007	3.20112e-08	1.65869e-07	down
A06G035800v1	D06G036500v1	51.0906	1.60897	0.439326	3.66237	0.000249891	0.000754082	up
A12G129600v1	D12G136200v1	24.8501	3.97687	0.81266	4.89365	9.89852e-07	4.28499e-06	up
A09G001100v1	D13G000100v1	173.841	-3.21602	0.289932	-11.0924	1.36646e-28	2.77436e-27	down
A12G160300v1	D12G168200v1	108.373	1.3959	0.30766	4.53715	5.70209e-06	2.22423e-05	up
A13G028100v1	D13G032100v1	26.391	6.72526	1.5377	4.37359	1.22222e-05	4.54866e-05	up
A05G011500v1	D05G011700v1	523.683	-1.27932	0.136614	-9.3645	7.64083e-21	1.06383e-19	down
A12G053900v1	D01G077600v1	9.59818	4.19632	1.38183	3.03678	0.0023912	0.0059338	up
A09G054900v1	D09G050700v1	35.5825	2.81742	0.621194	4.53549	5.74695e-06	2.24093e-05	up
A13G075200v1	D13G064100v1	181.588	1.31871	0.253803	5.19581	2.03835e-07	9.59426e-07	up
A03G174400v1	D02G204700v1	106.856	3.00402	0.34064	8.81875	1.15749e-18	1.42326e-17	up
A08G175300v1	D08G196400v1	49.5146	1.55429	0.443449	3.505	0.000456599	0.00131287	up
A11G120200v1	D11G121000v1	93.0486	-1.8325	0.332115	-5.51767	3.43515e-08	1.77156e-07	down
A05G460100v1	D04G006600v1	71.4618	-6.55094	0.898275	-7.2928	3.03576e-13	2.56936e-12	down
A07G108400v1	D07G108800v1	41.3472	-1.36902	0.491571	-2.78499	0.00535293	0.0122682	down
A03G215900v1	D02G246300v1	908.163	1.0485	0.104005	10.0813	6.68636e-24	1.09131e-22	up
A03G100700v1	D02G117900v1	26.5624	1.50039	0.613319	2.44635	0.0144311	0.0296632	up
A03G153500v1	D02G180700v1	38.7603	-8.71071	1.5122	-5.76029	8.39679e-09	4.67278e-08	down
A08G050700v1	D08G055200v1	722.098	1.05355	0.116262	9.06185	1.28259e-19	1.66501e-18	up
A07G118100v1	D07G118400v1	147.084	1.10416	0.252565	4.37179	1.2323e-05	4.57994e-05	up
A10G031900v1	D10G031800v1	215.679	2.72216	0.237736	11.4504	2.34142e-30	5.17122e-29	up
A07G051600v1	D07G052800v1	217.856	1.04594	0.22056	4.74222	2.11388e-06	8.71966e-06	up
A13G145400v1	D13G152500v1	176.815	-1.0329	0.229946	-4.49191	7.05861e-06	2.71515e-05	down
A12G207700v1	D12G215700v1	8.66451	-4.02011	1.38295	-2.90692	0.00365011	0.0087007	down
A11G066400v1	D11G066200v1	74.8351	1.34115	0.384023	3.49237	0.000478762	0.00137119	up
A02G054600v1	D02G061900v1	126.005	1.52065	0.280158	5.42783	5.70442e-08	2.86622e-07	up
A02G094300v1	D02G105100v1	140	1.85102	0.267439	6.92129	4.47543e-12	3.42495e-11	up
A12G288800v1	D12G298200v1	329.578	1.0535	0.170164	6.19108	5.97534e-10	3.72811e-09	up
A07G061400v1	D07G062400v1	53.1239	2.09541	0.502549	4.16956	3.05187e-05	0.000106874	up
A10G292100v1	D10G304600v1	646.46	4.77866	0.187702	25.4587	5.65259e-143	1.3023e-140	up
A02G010200v1	D02G008700v1	11.7744	7.01848	1.66886	4.20555	2.60453e-05	9.2063e-05	up
A12G124000v1	D12G128900v1	194.411	-1.09101	0.227105	-4.804	1.5553e-06	6.54065e-06	down
A09G152600v1	D09G149900v1	143.438	-1.42279	0.258	-5.51468	3.49412e-08	1.79985e-07	down
A01G109000v1	D01G112300v1	17.8692	4.09462	0.975744	4.1964	2.71187e-05	9.56408e-05	up
A04G194400v1	D04G233000v1	85.3221	-1.12681	0.383616	-2.93735	0.00331029	0.00795916	down
A07G195000v1	D07G206800v1	14.1501	-3.7071	1.04277	-3.55505	0.000377904	0.001104	down
A11G277600v1	D11G283000v1	80.2324	-2.05301	0.35903	-5.71822	1.07645e-08	5.92712e-08	down
A05G052900v1	D05G054900v1	40.6643	-3.39989	0.602284	-5.64499	1.65194e-08	8.89228e-08	down
A06G089500v1	D06G089300v1	651.265	1.47371	0.136578	10.7902	3.82754e-27	7.18469e-26	up
A03G217800v1	D02G247900v1	213.399	1.13268	0.234381	4.83263	1.34741e-06	5.72638e-06	up
A12G110500v1	D12G116100v1	128.128	3.79058	0.349282	10.8525	1.94049e-27	3.69318e-26	up
A05G030400v1	D05G032500v1	155.031	1.67105	0.251574	6.6424	3.08608e-11	2.17257e-10	up
A07G208000v1	D07G216400v1	89.7897	-3.16029	0.386003	-8.18722	2.67322e-16	2.82106e-15	down
A12G304300v1	D12G313700v1	190.72	2.92094	0.254822	11.4627	2.03161e-30	4.50514e-29	up
A03G227400v1	D02G257500v1	634.516	1.12555	0.125602	8.96123	3.21069e-19	4.06433e-18	up
A01G004000v1	D01G003100v1	101.458	-1.52111	0.326645	-4.65676	3.21225e-06	1.29502e-05	down
A11G192700v1	D11G196200v1	338.406	2.17794	0.178519	12.2	3.10679e-34	8.02814e-33	up
A05G040400v1	D05G042100v1	743.539	1.21731	0.116837	10.4189	2.03353e-25	3.57206e-24	up
A11G099400v1	D11G099800v1	9.0137	3.03455	1.21869	2.49001	0.0127739	0.0266751	up
A03G205800v1	D02G235100v1	109.422	-10.2079	1.46772	-6.95491	3.52777e-12	2.72258e-11	down
A05G332800v1	D05G337300v1	12.3293	4.5879	1.30348	3.51974	0.000431972	0.00124632	up
A13G216900v1	D13G229300v1	374.947	2.48492	0.176116	14.1095	3.31719e-45	1.18246e-43	up
A06G188900v1	D06G201200v1	30.1623	-5.88487	1.1441	-5.14367	2.69419e-07	1.24932e-06	down
A02G210900v1	D03G002600v1	29.5395	-1.47587	0.572783	-2.57666	0.0099759	0.0214166	down
A13G118700v1	D13G122800v1	250.607	-1.24872	0.201909	-6.18456	6.22747e-10	3.87879e-09	down
A11G055300v1	D11G055000v1	80.2261	1.80499	0.388853	4.64183	3.4534e-06	1.38713e-05	up
A10G053700v1	D10G052600v1	22.5944	-5.46059	1.20684	-4.52471	6.04781e-06	2.34904e-05	down
A09G202900v1	D09G203100v1	300.525	-2.71309	0.200322	-13.5436	8.64137e-42	2.81449e-40	down
A02G140500v1	D03G066600v1	10.3598	4.32567	1.37299	3.15054	0.00162967	0.00419229	up
A06G176400v1	D06G187300v1	9.41424	-6.66846	1.72025	-3.87645	0.000105992	0.000341053	down
A05G178500v1	D05G184900v1	97.2409	-2.10698	0.346483	-6.08105	1.19399e-09	7.25306e-09	down
A05G219800v1	D05G228100v1	238.042	3.88788	0.260757	14.91	2.83962e-50	1.18157e-48	up
A12G235400v1	D12G246100v1	49.5296	1.5992	0.485439	3.29433	0.000986582	0.0026619	up
A01G126800v1	D01G133100v1	4991.87	-1.67501	0.0505288	-33.1496	5.73382e-241	3.21785e-238	down
A05G109300v1	D05G109300v1	651.988	-1.35613	0.127612	-10.627	2.23119e-26	4.06613e-25	down
A12G121500v1	D12G127300v1	136.31	-1.06035	0.268794	-3.94485	7.9849e-05	0.000262884	down
A12G184300v1	D12G190100v1	99.8753	1.37735	0.37528	3.6702	0.000242364	0.000732707	up
A02G031500v1	D02G039100v1	18.2899	-6.16303	1.57869	-3.90389	9.46573e-05	0.000307703	down
A01G034100v1	D01G036700v1	326.418	2.59519	0.199891	12.983	1.52711e-38	4.47443e-37	up
A06G006000v1	D06G005200v1	130.296	1.26558	0.285379	4.43474	9.21847e-06	3.4829e-05	up
A01G067300v1	D01G068700v1	28.7562	-1.77116	0.599623	-2.95379	0.00313897	0.00757972	down
A06G190700v1	D06G202800v1	1203.29	-1.13821	0.0905857	-12.5651	3.28596e-36	8.93414e-35	down
A03G084300v1	D03G132600v1	3.44369	-5.21877	2.1199	-2.46181	0.013824	0.0285762	down
A12G069900v1	D12G071300v1	235.868	5.78581	0.396184	14.6039	2.65413e-48	1.04857e-46	up
A05G084500v1	D05G085300v1	61.781	1.16921	0.387418	3.01795	0.0025449	0.0062662	up
A03G051500v1	D03G164600v1	9.8666	-3.15268	1.18432	-2.66201	0.00776747	0.0171432	down
A01G230000v1	D01G243900v1	5.57917	4.42676	1.89278	2.33876	0.019348	0.0385603	up
A10G135100v1	D10G182600v1	64.9807	-1.53703	0.414399	-3.70907	0.000208022	0.000635803	down
A08G172000v1	D08G036700v1	1874.49	-7.60868	0.243948	-31.1898	1.46551e-213	6.41513e-211	down
A11G393800v1	D11G407300v1	267.074	3.58844	0.233202	15.3877	1.97956e-53	8.95179e-52	up
A10G186100v1	D10G129400v1	458.791	-1.21032	0.147505	-8.20532	2.29981e-16	2.44824e-15	down
A05G284900v1	D05G292500v1	17.5719	-5.07981	1.22304	-4.15344	3.27511e-05	0.000114198	down
A07G011400v1	D07G011900v1	289.552	4.13669	0.251116	16.4733	5.71091e-61	3.1327e-59	up
A12G270700v1	D12G279700v1	83.3451	2.98069	0.388521	7.67191	1.69459e-14	1.58299e-13	up
A10G041800v1	D10G041400v1	444.75	1.1386	0.150341	7.57347	3.63387e-14	3.30293e-13	up
A04G168500v1	D04G204900v1	4.73196	5.70424	1.99224	2.86323	0.00419345	0.0098616	up
A11G219100v1	D11G222900v1	50.1892	1.62166	0.460071	3.52481	0.000423785	0.0012248	up
A08G228200v1	D08G243900v1	18.56	-2.50599	0.79382	-3.15688	0.00159469	0.00410816	down
A02G165000v1	D03G055400v1	59.8647	1.94407	0.409616	4.74607	2.07409e-06	8.56843e-06	up
A10G074500v1	D10G073400v1	179.203	1.53419	0.240445	6.38064	1.7635e-10	1.15321e-09	up
A06G101800v1	D06G103200v1	491.79	-1.61223	0.158801	-10.1525	3.22954e-24	5.36712e-23	down
A02G138900v1	D03G065000v1	136.927	1.87151	0.276442	6.76999	1.28795e-11	9.39956e-11	up
A10G090700v1	D10G083000v1	31.9588	-1.51113	0.553737	-2.72898	0.00635315	0.0143086	down
A06G037900v1	D06G038800v1	532.335	1.3096	0.136199	9.61535	6.8876e-22	1.00903e-20	up
A11G255700v1	D11G264500v1	16392	1.24327	0.036087	34.452	4.20299e-260	2.7876e-257	up
A06G016700v1	D06G016400v1	215.05	-11.1827	1.45555	-7.68279	1.55656e-14	1.45592e-13	down
A11G112800v1	D11G113700v1	7.02538	6.27322	1.80075	3.48367	0.000494584	0.00141263	up
A02G011300v1	D02G009400v1	84.8032	1.28526	0.355739	3.61293	0.000302759	0.000901073	up
A06G045000v1	D06G048400v1	309.941	1.1584	0.188809	6.13533	8.49834e-10	5.23216e-09	up
A13G072600v1	D13G066400v1	7.34073	6.33509	1.80417	3.51136	0.000445822	0.00128323	up
A08G280600v1	D08G295100v1	253.323	-1.64522	0.197695	-8.32205	8.64558e-17	9.47076e-16	down
A10G283700v1	D10G290200v1	73.6102	1.46986	0.361391	4.06724	4.75732e-05	0.000162389	up
A08G148500v1	D08G166700v1	230.063	2.47544	0.220147	11.2445	2.46536e-29	5.18341e-28	up
A05G096300v1	D05G096500v1	8.82775	-6.5773	1.7622	-3.73244	0.000189634	0.000583841	down
A01G087100v1	D01G089500v1	8.66259	-6.54857	1.73889	-3.76594	0.000165922	0.000515697	down
A06G210900v1	D06G223600v1	178.898	1.2618	0.232659	5.42339	5.84787e-08	2.93291e-07	up
A03G001600v1	D03G219000v1	423.717	2.45399	0.16451	14.917	2.55611e-50	1.06767e-48	up
A06G145700v1	D08G047900v1	56.2076	-3.4273	0.497851	-6.8842	5.8113e-12	4.39502e-11	down
A08G075700v1	D08G079900v1	69.0512	-2.38906	0.398553	-5.99435	2.043e-09	1.21245e-08	down
A01G096400v1	D01G099100v1	72.1086	-2.80228	0.413228	-6.78143	1.18995e-11	8.70179e-11	down
A11G004500v1	D11G004500v1	165.915	-5.001	0.39276	-12.733	3.87805e-37	1.08541e-35	down
A03G195900v1	D02G226200v1	275.207	-5.90197	0.381868	-15.4556	6.92138e-54	3.15601e-52	down
A05G366600v1	D04G081300v1	12.7267	2.05528	0.908326	2.26271	0.0236537	0.0458677	up
A08G084600v1	D08G089500v1	234.054	-1.4062	0.202421	-6.94691	3.73378e-12	2.87346e-11	down
A06G166000v1	D06G168800v1	330.648	-1.02514	0.169926	-6.03287	1.61074e-09	9.63495e-09	down
A11G380000v1	D11G394500v1	36.8128	-8.63621	1.51591	-5.69704	1.21904e-08	6.66696e-08	down
A06G122600v1	D02G170200v1	506.212	1.73954	0.150054	11.5927	4.48515e-31	1.01938e-29	up
A06G081300v1	D06G080800v1	134.577	-1.91304	0.292527	-6.5397	6.1643e-11	4.20567e-10	down
A10G294400v1	D10G306900v1	225.309	1.74859	0.218272	8.01106	1.13727e-15	1.14919e-14	up
A02G210200v1	D03G003300v1	334.659	-1.54933	0.170922	-9.06455	1.25123e-19	1.62526e-18	down
A13G186300v1	D13G196400v1	26.487	-1.40254	0.610731	-2.2965	0.0216475	0.0425046	down
A13G135700v1	D13G142000v1	153.588	-1.38345	0.258583	-5.35015	8.78837e-08	4.31764e-07	down
A03G099900v1	D02G117000v1	6.00317	3.48965	1.54605	2.25714	0.0239991	0.0464551	up
A06G146700v1	D06G156000v1	57.4701	-1.94449	0.455285	-4.27092	1.94668e-05	7.01349e-05	down
A01G110900v1	D01G114600v1	41.1217	3.33726	0.570708	5.84759	4.9875e-09	2.85017e-08	up
A13G163600v1	D13G174000v1	281.895	1.58836	0.187685	8.4629	2.60813e-17	2.944e-16	up
A05G149900v1	D05G153600v1	17.838	3.2184	0.849958	3.78654	0.00015276	0.000477568	up
A13G042400v1	D13G045600v1	175.981	1.09077	0.239081	4.56233	5.05883e-06	1.98677e-05	up
A09G132200v1	D09G129800v1	1131.47	-1.45087	0.0945079	-15.3518	3.44292e-53	1.54416e-51	down
A06G177100v1	D06G188000v1	38.6893	-2.91698	0.570017	-5.11736	3.09836e-07	1.42376e-06	down
A09G042900v1	D09G041800v1	77.7873	5.95598	0.723254	8.23498	1.79588e-16	1.92113e-15	up
A07G270200v1	D07G281500v1	273.938	-1.29513	0.192251	-6.73664	1.62094e-11	1.17165e-10	down
A13G082700v1	D13G087200v1	54.3992	-1.18413	0.418557	-2.82908	0.00466814	0.0108451	down
A11G164800v1	D11G166500v1	87.2005	3.48239	0.40122	8.6795	3.97514e-18	4.71566e-17	up
A13G270300v1	D13G284800v1	6.47598	4.66105	1.83852	2.53522	0.0112376	0.0238018	up
A03G229900v1	D02G259800v1	87.1819	8.45943	1.47108	5.75049	8.89875e-09	4.93331e-08	up
A01G006500v1	D01G005400v1	28.8433	8.31087	1.53848	5.40199	6.59051e-08	3.28729e-07	up
A08G146200v1	D08G165100v1	137.206	-10.5342	1.4635	-7.19796	6.1121e-13	5.05195e-12	down
A03G089000v1	D03G123700v1	14.8355	-3.15651	0.988451	-3.19339	0.00140611	0.00366607	down
A09G081400v1	D09G083400v1	30.3635	2.20667	0.636673	3.46594	0.000528389	0.00150154	up
A07G159600v1	D07G162700v1	846.528	1.20538	0.107411	11.2221	3.17571e-29	6.65773e-28	up
A03G208100v1	D02G237400v1	326.688	1.95071	0.177919	10.964	5.69061e-28	1.11504e-26	up
A08G176000v1	D08G197100v1	257.876	1.41369	0.193163	7.31861	2.50554e-13	2.13963e-12	up
A05G377200v1	D04G092500v1	64.4839	-1.26682	0.41188	-3.07571	0.00210005	0.00526684	down
A11G048400v1	D11G047700v1	36.3963	-3.60445	0.634563	-5.6802	1.34534e-08	7.32292e-08	down
A07G186500v1	D07G194700v1	1217.57	1.17636	0.0916299	12.8381	1.00249e-37	2.87194e-36	up
A06G192800v1	D03G101300v1	7.5199	6.37152	1.78139	3.57671	0.000347941	0.00102179	up
A11G080500v1	D11G079700v1	3.92344	-5.40742	2.06971	-2.61265	0.00898432	0.0195021	down
A03G185300v1	D02G215000v1	39.4731	-7.28599	1.50519	-4.84056	1.29473e-06	5.51317e-06	down
A11G025500v1	D11G025300v1	269.518	1.50532	0.195544	7.69812	1.38081e-14	1.29707e-13	up
A05G429200v1	D04G039300v1	10.2719	4.30129	1.35557	3.17306	0.00150841	0.00390817	up
A08G073900v1	D08G078300v1	117.132	-1.76996	0.317015	-5.58319	2.36152e-08	1.24757e-07	down
A03G249300v1	D02G279000v1	165.111	1.57492	0.243906	6.45707	1.06752e-10	7.11042e-10	up
A07G118800v1	D07G119100v1	670.947	1.0812	0.125829	8.59257	8.50444e-18	9.91143e-17	up
A12G142800v1	D12G150800v1	8.91791	6.61657	2.84644	2.32451	0.0200982	0.0399104	up
A03G106500v1	D02G128200v1	493.132	-1.41437	0.14033	-10.0789	6.84937e-24	1.11708e-22	down
A02G084800v1	D02G094600v1	130.518	-1.32205	0.286757	-4.61035	4.01986e-06	1.59969e-05	down
A10G042500v1	D10G042100v1	8.76471	6.59268	1.74035	3.78814	0.000151779	0.000474908	up
A12G153100v1	D12G160400v1	220.281	2.37918	0.233901	10.1717	2.652e-24	4.42074e-23	up
A01G128900v1	D01G135400v1	4.52726	5.63886	1.97108	2.86079	0.00422582	0.00992813	up
A12G072200v1	D12G073600v1	489.511	1.72357	0.145773	11.8237	2.94431e-32	7.04286e-31	up
A05G312900v1	D05G318800v1	21.7638	-1.8315	0.684016	-2.67757	0.00741574	0.0164566	down
A09G092300v1	D09G094600v1	6.92295	-6.22534	1.804	-3.45086	0.000558801	0.00157996	down
A08G096800v1	D08G103400v1	43.4141	-8.87444	1.50562	-5.8942	3.76494e-09	2.17595e-08	down
A07G209700v1	D07G217100v1	451.781	2.07926	0.152427	13.641	2.28303e-42	7.54813e-41	up
A03G018400v1	D03G198900v1	6.20688	-6.06715	1.85806	-3.26532	0.00109341	0.00292116	down
A13G270500v1	D02G207700v1	9.56084	5.23459	1.69776	3.08323	0.00204766	0.00514902	up
A01G209700v1	D01G223800v1	584.79	-1.4335	0.133434	-10.7431	6.38379e-27	1.18811e-25	down
A12G271800v1	D12G280800v1	548.732	-1.40915	0.133373	-10.5654	4.30963e-26	7.71258e-25	down
A08G295300v1	D08G310600v1	87.4888	-1.22725	0.331674	-3.70018	0.000215447	0.00065648	down
A03G116700v1	D02G151700v1	231.616	1.05375	0.201098	5.23997	1.60606e-07	7.64667e-07	up
A10G077300v1	D10G075700v1	595.742	2.08869	0.135413	15.4246	1.11868e-53	5.06926e-52	up
A07G096300v1	D07G096700v1	23.7268	-2.64715	0.69435	-3.81242	0.000137615	0.000433379	down
A12G249700v1	D12G259600v1	43.7891	8.91262	1.50475	5.92297	3.16178e-09	1.84342e-08	up
A02G004300v1	D02G000900v1	606.716	-1.1747	0.129836	-9.04759	1.46164e-19	1.89295e-18	down
A05G240500v1	D05G250000v1	28.2176	-4.41797	0.837514	-5.2751	1.32684e-07	6.37694e-07	down
A11G198000v1	D11G202800v1	473.096	-4.73714	0.218242	-21.7059	1.80637e-104	2.42553e-102	down
A01G229200v1	D01G243000v1	861.597	1.7159	0.110794	15.4873	4.22855e-54	1.94026e-52	up
A11G244400v1	D11G234800v1	312.86	1.80398	0.181541	9.93703	2.87275e-23	4.52996e-22	up
A02G058100v1	D02G064900v1	48.258	1.42716	0.443507	3.21791	0.00129128	0.00339814	up
A05G179200v1	D05G185600v1	23.2342	1.8022	0.65779	2.73978	0.00614804	0.0138939	up
A01G172400v1	D01G178600v1	152.318	-3.21349	0.29427	-10.9202	9.23007e-28	1.78147e-26	down
A13G033200v1	D13G036700v1	275.722	5.50178	0.597466	9.20853	3.30612e-20	4.48334e-19	up
A08G190500v1	D08G211000v1	14.7369	1.98809	0.841864	2.36153	0.0181996	0.0364641	up
A09G002000v1	D09G000900v1	459.684	4.00764	0.191444	20.9338	2.63765e-97	3.15466e-95	up
A05G187900v1	D05G195200v1	285.539	-3.58831	0.236296	-15.1856	4.4047e-52	1.90902e-50	down
A10G221400v1	D10G229700v1	428.157	-1.20014	0.151237	-7.93548	2.09677e-15	2.07844e-14	down
A11G218600v1	D11G222000v1	12.3426	-3.93862	1.14806	-3.43066	0.00060211	0.00169171	down
A01G176800v1	D01G188200v1	37.1205	-2.84332	0.57754	-4.92316	8.51571e-07	3.71578e-06	down
A08G106000v1	D08G114600v1	123.467	-1.55219	0.282474	-5.49498	3.90753e-08	2.00103e-07	down
A12G010500v1	D12G011900v1	164.447	1.35322	0.258697	5.23092	1.68664e-07	8.01467e-07	up
A07G231800v1	D07G240600v1	446.827	1.03007	0.155787	6.612	3.79159e-11	2.64794e-10	up
A01G035000v1	D01G037400v1	24.0234	-2.10476	0.656999	-3.2036	0.0013572	0.00355213	down
A05G075000v1	D05G076400v1	58.2869	-4.32387	0.575218	-7.51692	5.60833e-14	5.03897e-13	down
A03G189200v1	D02G218900v1	46.3399	-1.23842	0.459692	-2.69401	0.00705975	0.0157461	down
A12G094000v1	D12G094400v1	125.961	2.36059	0.300001	7.8686	3.58644e-15	3.49183e-14	up
A05G003100v1	D05G003500v1	149.564	-1.92465	0.262253	-7.3389	2.15363e-13	1.84849e-12	down
A11G102500v1	D11G103200v1	483.178	1.18716	0.140337	8.45937	2.68836e-17	3.02987e-16	up
A06G220500v1	D06G235500v1	7.95362	-6.42474	1.78607	-3.59714	0.000321732	0.000951973	down
A01G044300v1	D01G047000v1	161.564	-1.39506	0.258473	-5.3973	6.7651e-08	3.36901e-07	down
A08G085900v1	D08G090600v1	39.441	8.76206	1.51145	5.79712	6.74648e-09	3.79492e-08	up
A05G085100v1	D05G086000v1	134.49	2.81478	0.330806	8.50886	1.75653e-17	2.00235e-16	up
A05G368400v1	D04G083600v1	14.2863	-4.77109	1.2761	-3.7388	0.000184899	0.000570451	down
A05G203500v1	D05G210700v1	439.299	-1.02301	0.14674	-6.97159	3.13378e-12	2.43137e-11	down
A03G120200v1	D02G140500v1	63.7842	1.17895	0.388501	3.03461	0.00240849	0.00596874	up
A02G098800v1	D02G109700v1	45.0052	-5.45279	0.835776	-6.52423	6.83536e-11	4.64614e-10	down
A03G146000v1	D02G172500v1	376.008	1.72508	0.178672	9.65503	4.68044e-22	6.93574e-21	up
A11G311300v1	D11G320000v1	269.3	1.26466	0.200467	6.30857	2.81627e-10	1.81453e-09	up
A08G042800v1	D08G047000v1	165.679	1.41496	0.240263	5.88922	3.88019e-09	2.24019e-08	up
A11G219700v1	D11G223600v1	29.4159	2.6842	0.632604	4.24311	2.20448e-05	7.87618e-05	up
A01G178200v1	D01G189800v1	36.701	-1.31454	0.521119	-2.52253	0.0116515	0.0245739	down
A06G156700v1	D06G158300v1	73.7983	4.34764	0.50475	8.61344	7.09008e-18	8.29843e-17	up
A01G112700v1	D01G116900v1	227.913	-1.17269	0.213859	-5.48348	4.17037e-08	2.12519e-07	down
A05G111000v1	D05G111100v1	128.939	1.46218	0.273081	5.35438	8.58481e-08	4.22143e-07	up
A06G017700v1	D06G017100v1	130.516	-1.13412	0.286343	-3.96069	7.47349e-05	0.000247051	down
A03G263100v1	D02G292900v1	43.2152	-6.40828	1.10528	-5.79789	6.71562e-09	3.77853e-08	down
A09G117500v1	D09G119300v1	519.234	2.13228	0.157086	13.574	5.71509e-42	1.86696e-40	up
A05G014000v1	D05G014700v1	307.12	-1.35893	0.180824	-7.51524	5.68075e-14	5.10195e-13	down
A13G071300v1	D13G067100v1	103.628	6.10564	0.651846	9.3667	7.4835e-21	1.04259e-19	up
A05G044600v1	D05G046700v1	216.657	2.95783	0.23848	12.4029	2.52136e-35	6.68908e-34	up
A08G149100v1	D08G167400v1	2234.04	1.15396	0.0724298	15.9321	3.79191e-57	1.87345e-55	up
A05G303000v1	D05G309900v1	1444.09	1.0389	0.0902271	11.5143	1.11812e-30	2.50227e-29	up
A12G009000v1	D12G010300v1	10.2879	3.69656	1.22637	3.01422	0.00257641	0.0063338	up
A03G210100v1	D02G239700v1	10.2015	-2.51976	1.06303	-2.37036	0.0177708	0.0357227	down
A02G123400v1	D03G103600v1	24.4487	3.50461	0.771256	4.54402	5.51905e-06	2.1586e-05	up
A07G141500v1	D07G142600v1	11.6052	-6.97088	1.66547	-4.18552	2.84514e-05	0.000100083	down
A11G155100v1	D11G156000v1	241.622	1.98693	0.210197	9.45268	3.3025e-21	4.6845e-20	up
A01G202100v1	D01G214900v1	767.738	-1.13318	0.125625	-9.02034	1.87509e-19	2.41271e-18	down
A11G090600v1	D11G090400v1	206.215	1.07393	0.221429	4.84999	1.23466e-06	5.26765e-06	up
A05G278600v1	D05G285900v1	551.703	-1.61156	0.134322	-11.9977	3.65186e-33	9.05191e-32	down
A07G178000v1	D07G184200v1	156.041	-1.40846	0.250479	-5.62307	1.87591e-08	1.00289e-07	down
A10G035000v1	D10G034800v1	106.683	-1.05901	0.334483	-3.16612	0.00154487	0.00399391	down
A12G272400v1	D12G281500v1	531.942	3.01569	0.153725	19.6174	1.09748e-85	1.03985e-83	up
A13G175800v1	D13G187500v1	543.087	-1.09414	0.132345	-8.26731	1.37014e-16	1.48163e-15	down
A11G260700v1	D11G266800v1	6.15899	-3.49215	1.50843	-2.31508	0.0206083	0.0407604	down
A07G033100v1	D07G033400v1	243.307	3.73259	0.254657	14.6573	1.20974e-48	4.84051e-47	up
A05G112400v1	D05G112700v1	46.9999	5.21422	0.766067	6.80648	1.00016e-11	7.37053e-11	up
A09G154300v1	D09G151700v1	68.706	-3.18881	0.450914	-7.07189	1.52838e-12	1.22354e-11	down
A05G265100v1	D05G273100v1	163.058	1.40283	0.24748	5.66848	1.4407e-08	7.80897e-08	up
A02G209500v1	D03G004000v1	9.6221	-6.70067	1.70892	-3.92101	8.81794e-05	0.000288358	down
A07G042300v1	D07G043000v1	26.3069	1.93373	0.651284	2.9691	0.00298676	0.00723935	up
A06G010900v1	D06G009800v1	4.4459	-5.5866	1.97891	-2.82307	0.00475657	0.0110306	down
A05G150600v1	D05G154300v1	2055.68	1.58999	0.0732149	21.7168	1.423e-104	1.92254e-102	up
A11G226800v1	D11G254000v1	969.98	-2.04314	0.109717	-18.622	2.13233e-77	1.67277e-75	down
A12G164300v1	D12G172300v1	40.5725	1.27156	0.490933	2.59008	0.00959528	0.0206888	up
A12G034300v1	D12G043900v1	68.103	2.23871	0.449818	4.97692	6.46049e-07	2.8537e-06	up
A07G262300v1	D07G272600v1	21.7355	-7.87611	1.56484	-5.03317	4.82424e-07	2.1628e-06	down
A09G065000v1	D09G064900v1	10.4109	-2.57767	1.13295	-2.27518	0.0228954	0.0446266	down
A11G281200v1	D11G286000v1	628.13	1.39194	0.124858	11.1482	7.30942e-29	1.50217e-27	up
A09G094700v1	D09G096900v1	189.378	2.88951	0.265959	10.8645	1.70158e-27	3.25261e-26	up
A05G033600v1	D05G035500v1	86.4671	-6.09789	1.33012	-4.58446	4.55159e-06	1.79691e-05	down
A12G051700v1	D12G053500v1	70.7791	1.68379	0.376671	4.47019	7.815e-06	2.98668e-05	up
A01G027900v1	D01G028500v1	54.6698	1.2363	0.421193	2.93523	0.00333296	0.00800929	up
A05G065600v1	D05G067500v1	91.5318	4.38192	0.467745	9.3682	7.37809e-21	1.02856e-19	up
A05G012900v1	D05G013100v1	35.6288	1.76302	0.596615	2.95504	0.00312627	0.00755156	up
A09G053900v1	D09G052100v1	775.818	-1.08439	0.113194	-9.57992	9.71195e-22	1.40493e-20	down
A05G099700v1	D05G099500v1	28.6686	-3.54797	0.709334	-5.00183	5.67881e-07	2.52832e-06	down
A10G123900v1	D10G196800v1	390.99	1.29292	0.156823	8.24444	1.65933e-16	1.77854e-15	up
A12G061900v1	D12G063100v1	79.4185	-2.06125	0.374398	-5.50551	3.68092e-08	1.8903e-07	down
A05G426100v1	D04G042700v1	912.036	-1.3729	0.106245	-12.9221	3.38011e-38	9.83782e-37	down
A05G301200v1	D05G308300v1	546.172	-1.04132	0.132739	-7.84488	4.33381e-15	4.2008e-14	down
A05G075600v1	D05G077100v1	3683.22	5.5159	0.0965697	57.1184	0	0	up
A08G036400v1	D03G156400v1	44.5076	-3.4382	0.570666	-6.02489	1.69221e-09	1.00947e-08	down
A10G142300v1	D10G174400v1	7.66038	-6.37146	1.77139	-3.59687	0.000322065	0.000952701	down
A05G277000v1	D05G284300v1	441.22	1.1878	0.147114	8.07404	6.80112e-16	6.97545e-15	up
A06G133400v1	D06G139800v1	300.435	-2.98531	0.209415	-14.2554	4.1474e-46	1.5205e-44	down
A10G001400v1	D10G001200v1	335.288	6.06257	0.35929	16.8738	7.01691e-64	4.1396e-62	up
A11G306200v1	D11G311100v1	22.2184	7.93327	1.57017	5.05248	4.36111e-07	1.96686e-06	up
A10G086200v1	D10G087600v1	168.226	-1.06178	0.241438	-4.39775	1.09377e-05	4.09221e-05	down
A12G209100v1	D12G217100v1	344.926	1.36195	0.189599	7.18331	6.80441e-13	5.5904e-12	up
A12G143400v1	D12G151500v1	345.853	-3.22172	0.201377	-15.9984	1.31012e-57	6.56169e-56	down
A02G035600v1	D02G044800v1	90.2554	9.95624	1.47297	6.7593	1.3866e-11	1.0096e-10	up
A12G238700v1	D12G249100v1	79.2556	4.56448	0.511359	8.92619	4.4095e-19	5.54022e-18	up
A13G101700v1	D13G113000v1	91.9777	9.98358	1.47254	6.77983	1.20315e-11	8.79538e-11	up
A10G253000v1	D10G262800v1	681.254	-2.2806	0.131699	-17.3168	3.51424e-67	2.24901e-65	down
A08G193000v1	D08G213300v1	208.164	-1.98525	0.23174	-8.56669	1.06506e-17	1.22948e-16	down
A01G090300v1	D01G092900v1	8.61713	-3.39426	1.29833	-2.61433	0.00894031	0.0194181	down
A06G123300v1	D06G127000v1	40.856	-3.00155	0.55341	-5.42373	5.8368e-08	2.9287e-07	down
A02G022100v1	D02G022400v1	95.4985	10.0373	1.47341	6.81231	9.60421e-12	7.08962e-11	up
A06G061200v1	D06G061400v1	259.685	-2.37445	0.207242	-11.4574	2.16019e-30	4.78542e-29	down
A05G168800v1	D05G175100v1	119.177	-1.37244	0.282756	-4.85379	1.21124e-06	5.17983e-06	down
A12G187100v1	D12G193100v1	665.815	-5.4077	0.221335	-24.4322	7.78863e-132	1.62352e-129	down
A07G211600v1	D07G220500v1	13.2862	4.07987	1.13015	3.61002	0.000306176	0.000910128	up
A06G008900v1	D06G008200v1	12.588	-4.58698	1.28409	-3.57217	0.000354036	0.00103857	down
A05G444200v1	D04G021900v1	167.122	-1.04247	0.243164	-4.28713	1.81e-05	6.55884e-05	down
A09G092800v1	D09G095300v1	51.0755	-1.49892	0.443385	-3.38062	0.000723219	0.00199812	down
A08G140600v1	D08G158500v1	289.241	-1.3426	0.184942	-7.25957	3.88336e-13	3.25029e-12	down
A03G231400v1	D02G261600v1	619.793	1.67517	0.132179	12.6735	8.29672e-37	2.29861e-35	up
A06G223500v1	D06G237800v1	199.117	-2.26884	0.23342	-9.72003	2.47715e-22	3.73141e-21	down
A11G072600v1	D11G071900v1	80.7636	-9.76977	1.47643	-6.61714	3.66224e-11	2.56415e-10	down
A13G221000v1	D13G233400v1	13.8174	-7.22272	1.63191	-4.42593	9.60278e-06	3.62123e-05	down
A08G149600v1	D08G168100v1	444.256	1.07123	0.145594	7.35763	1.87201e-13	1.61437e-12	up
A05G403100v1	D04G063500v1	21.3317	3.74658	0.842392	4.44755	8.68536e-06	3.29514e-05	up
A05G214600v1	D05G222600v1	293.386	-2.87374	0.204286	-14.0672	6.04217e-45	2.12612e-43	down
A13G100300v1	D13G114600v1	5.2435	5.85197	1.92776	3.03563	0.00240037	0.00595252	up
A11G028500v1	D11G028300v1	32.0879	-8.4382	1.52641	-5.52814	3.23635e-08	1.67615e-07	down
A02G205700v1	D03G007900v1	153.844	-1.44304	0.274039	-5.26581	1.3957e-07	6.69027e-07	down
A12G281900v1	D12G291100v1	146.416	-1.11773	0.278823	-4.00872	6.10478e-05	0.000204743	down
A01G252300v1	D01G266100v1	49.3112	2.43884	0.501189	4.8661	1.13821e-06	4.8876e-06	up
A02G168800v1	D03G058400v1	77.014	-1.28955	0.357888	-3.60323	0.000314283	0.000931695	down
A10G095400v1	D10G076400v1	53.555	6.1557	0.935248	6.58189	4.64503e-11	3.21321e-10	up
A03G109800v1	D02G130000v1	160.071	1.46694	0.250536	5.85518	4.76479e-09	2.72789e-08	up
A06G131900v1	D06G138200v1	155.944	-10.7192	1.46073	-7.33825	2.16407e-13	1.85672e-12	down
A05G134300v1	D05G135800v1	87.1088	-3.39708	0.398601	-8.52252	1.56113e-17	1.78518e-16	down
A10G088000v1	D10G086000v1	26.2553	-1.91077	0.626031	-3.0522	0.00227169	0.00566228	down
A04G148100v1	D04G183900v1	565.514	-1.07365	0.131144	-8.18682	2.68221e-16	2.82919e-15	down
A05G113200v1	D05G113400v1	261.998	-1.63297	0.197693	-8.26012	1.45521e-16	1.56665e-15	down
A13G002900v1	D13G005400v1	135.305	1.44742	0.289597	4.99805	5.79125e-07	2.57576e-06	up
A07G222900v1	D07G231700v1	292.953	-2.34847	0.198892	-11.8078	3.55925e-32	8.48599e-31	down
A01G037400v1	D01G040800v1	19.0385	7.71176	1.58807	4.85604	1.19755e-06	5.12529e-06	up
A01G263000v1	D08G266100v1	3.49567	5.26701	2.12392	2.47985	0.0131437	0.0273587	up
A10G272300v1	D10G293200v1	153.578	1.59268	0.254473	6.25875	3.88069e-10	2.46909e-09	up
A07G232600v1	D07G241300v1	32.4186	-1.92336	0.572373	-3.36033	0.000778495	0.00213923	down
A04G135600v1	D04G171100v1	3.80251	5.38588	2.08536	2.58271	0.00980268	0.0210882	up
A03G220100v1	D02G250400v1	113.427	1.30458	0.325185	4.0118	6.0258e-05	0.000202311	up
A03G190000v1	D02G219600v1	29.2116	1.43285	0.576064	2.48731	0.0128715	0.0268508	up
A05G003700v1	D05G004200v1	569.055	-1.68077	0.133209	-12.6176	1.68919e-36	4.6272e-35	down
A05G326000v1	D05G330200v1	203.586	2.88894	0.244482	11.8166	3.20465e-32	7.65723e-31	up
A05G416100v1	D04G052300v1	246.581	-1.93527	0.211415	-9.15387	5.49322e-20	7.32218e-19	down
A11G374200v1	D11G387900v1	68.9566	-1.46046	0.377906	-3.86463	0.00011126	0.000356509	down
A10G182400v1	D10G133500v1	8261.35	-1.27267	0.0418015	-30.4455	1.37326e-203	5.56603e-201	down
A05G225100v1	D05G233800v1	13.792	4.14612	1.1387	3.64111	0.000271468	0.000814812	up
A12G241700v1	D12G251800v1	750.911	-1.18234	0.115452	-10.2409	1.3001e-24	2.21098e-23	down
A03G018900v1	D03G198000v1	102.138	-2.6164	0.336513	-7.77503	7.54324e-15	7.20641e-14	down
A09G284100v1	D09G282400v1	69.7816	2.56451	0.433303	5.91851	3.24872e-09	1.89259e-08	up
A01G160700v1	D01G170800v1	73.1091	1.50719	0.362353	4.15944	3.19023e-05	0.000111416	up
A10G296700v1	D10G309900v1	1079.68	2.35273	0.102424	22.9705	9.19555e-117	1.47987e-114	up
A07G012900v1	D07G013300v1	31.9146	3.42663	0.655314	5.22899	1.7044e-07	8.09379e-07	up
A06G012000v1	D06G010900v1	12.8068	-2.90555	0.992295	-2.92811	0.00341029	0.00818253	down
A12G105100v1	D12G110600v1	267.478	1.32057	0.193342	6.83021	8.47923e-12	6.29101e-11	up
A02G069100v1	D02G076800v1	311.401	-3.22973	0.539935	-5.9817	2.20815e-09	1.30445e-08	down
A01G201100v1	D01G214000v1	4.0753	5.48526	2.10575	2.60489	0.00919042	0.0199061	up
A02G207100v1	D03G006300v1	164.91	1.04583	0.237454	4.40437	1.06091e-05	3.98149e-05	up
A09G164800v1	D09G163600v1	7.81823	6.42659	1.76934	3.6322	0.000281013	0.000840926	up
A01G171400v1	D01G180400v1	237.759	-2.22349	0.217726	-10.2123	1.7468e-24	2.94774e-23	down
A05G102200v1	D05G102200v1	779.238	-1.84088	0.116353	-15.8216	2.20869e-56	1.06479e-54	down
A09G196400v1	D09G195600v1	97.8025	-1.61281	0.330518	-4.87964	1.06281e-06	4.57998e-06	down
A05G182000v1	D05G188600v1	95.4115	-5.06532	0.520793	-9.72618	2.33176e-22	3.51967e-21	down
A05G132700v1	D05G134200v1	4.71068	-5.66942	1.96131	-2.89064	0.00384464	0.00910994	down
A12G021500v1	D12G023800v1	218.024	-1.286	0.219609	-5.85584	4.74612e-09	2.7179e-08	down
A07G243000v1	D07G252500v1	2022.23	3.95545	0.0926663	42.6849	0	0	up
A05G161700v1	D05G166200v1	71.5895	-8.14861	1.47468	-5.52567	3.28239e-08	1.69758e-07	down
A01G059900v1	D01G061600v1	80.5409	-2.64594	0.389949	-6.78535	1.15806e-11	8.47706e-11	down
A11G167700v1	D11G169500v1	33.7131	1.88602	0.575366	3.27794	0.00104567	0.00280404	up
A05G014700v1	D05G015400v1	157.317	-2.66892	0.273315	-9.765	1.59113e-22	2.42346e-21	down
A04G045800v1	D05G407000v1	76.2073	-3.6054	0.437768	-8.23587	1.78254e-16	1.90779e-15	down
A10G106400v1	D10G112700v1	126.054	1.71721	0.281532	6.09951	1.06393e-09	6.4882e-09	up
A01G009800v1	D01G008400v1	382.025	-1.1196	0.158638	-7.05757	1.69439e-12	1.3515e-11	down
A05G045300v1	D05G047400v1	28.9247	2.88023	0.647693	4.44691	8.71129e-06	3.30383e-05	up
A10G172100v1	D10G144700v1	79.0106	1.41488	0.372886	3.7944	0.000148002	0.00046396	up
A07G162600v1	D07G165700v1	50.4342	-1.0963	0.433949	-2.52633	0.011526	0.0243481	down
A11G176300v1	D11G179100v1	344.052	-1.31363	0.174482	-7.52876	5.12248e-14	4.61952e-13	down
A13G212100v1	D13G224500v1	13.8236	2.80784	0.920737	3.04956	0.00229179	0.00570783	up
A12G073400v1	D12G075000v1	23.5596	2.42502	0.679895	3.56676	0.000361424	0.00105925	up
A12G263600v1	D12G272600v1	17.8533	7.61838	1.59058	4.78969	1.67038e-06	6.99973e-06	up
A02G129100v1	D03G080300v1	84.3483	1.07191	0.335528	3.1947	0.00139975	0.00365023	up
A12G273100v1	D12G282200v1	496.675	-1.35602	0.140933	-9.62173	6.47341e-22	9.51535e-21	down
A09G099300v1	D09G101900v1	74.9093	2.30348	0.389805	5.90931	3.4355e-09	1.99398e-08	up
A06G155000v1	D06G160100v1	151.507	6.06955	0.53265	11.395	4.42852e-30	9.68303e-29	up
A13G099800v1	D13G115300v1	10.5887	-6.8391	1.69046	-4.0457	5.21666e-05	0.000176827	down
A02G023800v1	D02G024700v1	18.9865	-7.68132	1.58324	-4.85166	1.22434e-06	5.23052e-06	down
A12G221100v1	D12G229000v1	116.331	-3.25531	0.361532	-9.0042	2.17251e-19	2.78068e-18	down
A02G169600v1	D03G059100v1	64.7971	9.47834	1.48529	6.38149	1.75378e-10	1.14719e-09	up
A10G261600v1	D10G274700v1	143.981	9.18486	1.45679	6.30488	2.88422e-10	1.85504e-09	up
A06G040600v1	D06G041300v1	336.268	-6.19643	0.374289	-16.5552	1.4681e-61	8.17618e-60	down
A08G207300v1	D08G225200v1	7.42406	-6.32601	1.78345	-3.54707	0.000389545	0.00113548	down
A01G111800v1	D01G116000v1	29.7284	-1.42881	0.575699	-2.48187	0.0130695	0.0272327	down
A05G151300v1	D05G155000v1	19.2869	-7.70349	1.58087	-4.87296	1.09941e-06	4.72746e-06	down
A01G047700v1	D01G050400v1	5.0388	5.79301	1.9249	3.00951	0.00261669	0.00642416	up
A13G024500v1	D13G028500v1	280.446	-4.60626	0.27469	-16.7689	4.11762e-63	2.39051e-61	down
A01G021200v1	D01G019600v1	146.431	-2.41302	0.274479	-8.79127	1.47872e-18	1.80607e-17	down
A01G081100v1	D01G082400v1	38.817	1.22709	0.49298	2.48912	0.0128058	0.0267341	up
A05G057100v1	D05G058600v1	236.218	-2.13621	0.216075	-9.88642	4.76757e-23	7.42688e-22	down
A05G432600v1	D04G033800v1	122.495	5.92947	0.571042	10.3836	2.94452e-25	5.1352e-24	up
A08G067200v1	D08G072800v1	31.7509	-1.32481	0.546683	-2.42335	0.015378	0.0314383	down
A08G101000v1	D08G116000v1	302.05	1.40623	0.178386	7.88309	3.19393e-15	3.12217e-14	up
A03G220800v1	D02G251100v1	201.983	1.33774	0.221993	6.02606	1.68003e-09	1.00247e-08	up
A02G107900v1	D02G122700v1	60.8075	1.33725	0.427502	3.12806	0.00175963	0.0044934	up
A10G141400v1	D10G175100v1	121.144	-1.13201	0.298908	-3.78715	0.000152386	0.000476671	down
A06G246300v1	D06G259300v1	326.867	2.00481	0.177808	11.2752	1.74066e-29	3.70602e-28	up
A07G187700v1	D07G196100v1	171.003	1.64367	0.245497	6.69526	2.15282e-11	1.53731e-10	up
A08G054800v1	D08G060000v1	70.7863	-3.96093	0.485705	-8.15502	3.49123e-16	3.65261e-15	down
A11G295600v1	D11G302200v1	182.805	10.9747	1.45863	7.52394	5.31491e-14	4.78517e-13	up
A01G254500v1	D01G268400v1	19.6571	-2.93935	0.824407	-3.56541	0.00036329	0.00106429	down
A03G156100v1	D02G186700v1	29.0038	-1.38109	0.573296	-2.40903	0.0159948	0.0325685	down
A08G087100v1	D08G092000v1	7.30945	3.14373	1.31975	2.38206	0.0172159	0.0347285	up
A06G074600v1	D06G074900v1	126.762	-1.49739	0.278346	-5.3796	7.46528e-08	3.69499e-07	down
A11G241300v1	D11G237800v1	225.851	1.83555	0.214765	8.54676	1.26596e-17	1.45221e-16	up
A07G003400v1	D07G004400v1	198.714	11.095	1.45697	7.6151	2.63495e-14	2.42417e-13	up
A05G084100v1	D08G236400v1	88.6551	1.99913	0.352553	5.67045	1.42419e-08	7.72329e-08	up
A06G030300v1	D06G030100v1	218.562	-1.61561	0.214199	-7.54257	4.60795e-14	4.16581e-13	down
A01G151100v1	D01G159200v1	120.063	7.91993	1.0533	7.51914	5.51369e-14	4.95802e-13	up
A09G136300v1	D09G132300v1	1500.22	-1.17182	0.0830642	-14.1074	3.41725e-45	1.21615e-43	down
A05G191400v1	D05G198200v1	69.5024	-2.78641	0.411681	-6.76838	1.30234e-11	9.50146e-11	down
A07G203300v1	D07G211600v1	14.5335	-7.2959	1.62642	-4.48586	7.26213e-06	2.78658e-05	down
A04G159600v1	D04G195800v1	209.347	1.34955	0.213334	6.32601	2.51574e-10	1.6252e-09	up
A10G212000v1	D10G222600v1	25.2426	-2.30383	0.681014	-3.38293	0.000717161	0.00198339	down
A09G034300v1	D09G035900v1	15.7828	2.60778	0.842675	3.09465	0.00197048	0.00496751	up
A06G093400v1	D06G094100v1	126.252	2.26523	0.292316	7.74926	9.24307e-15	8.7729e-14	up
A08G122000v1	D08G149600v1	8.13112	-4.96709	1.74412	-2.84791	0.00440077	0.0102859	down
A03G222500v1	D02G252700v1	33.2202	-1.25882	0.533915	-2.35772	0.0183876	0.0368139	down
A05G006500v1	D05G006500v1	246.905	1.50871	0.19866	7.59443	3.09139e-14	2.83101e-13	up
A08G170100v1	D08G190000v1	184.714	1.00486	0.22893	4.38938	1.13674e-05	4.24355e-05	up
A07G125000v1	D07G124800v1	844.927	-1.27121	0.109888	-11.5683	5.96471e-31	1.34587e-29	down
A05G413200v1	D04G054600v1	323.063	1.18459	0.185939	6.37083	1.88003e-10	1.22794e-09	up
A07G154200v1	D07G156800v1	272.341	-1.1605	0.187297	-6.19605	5.78961e-10	3.62463e-09	down
A12G001500v1	D12G002100v1	195.339	2.16968	0.236211	9.18536	4.10162e-20	5.52104e-19	up
A07G102100v1	D07G102400v1	24.4963	-4.19008	1.48096	-2.82929	0.00466517	0.0108405	down
A09G220200v1	D09G220700v1	3.04371	5.06466	2.21697	2.28449	0.0223426	0.0436852	up
A04G000500v1	D13G288500v1	33.3898	-1.31057	0.563674	-2.32505	0.0200692	0.0398669	down
A11G050700v1	D11G050200v1	42.3409	-1.31454	0.520245	-2.52678	0.0115114	0.0243241	down
A07G133800v1	D07G134400v1	164.648	2.34072	0.257102	9.10424	8.68763e-20	1.1386e-18	up
A03G092500v1	D03G127400v1	95.1835	10.0331	1.47208	6.81563	9.3853e-12	6.93505e-11	up
A01G194800v1	D01G206700v1	486.507	-2.21001	0.150927	-14.6429	1.49482e-48	5.9594e-47	down
A11G083100v1	D11G082200v1	42.7371	-1.75562	0.516689	-3.39783	0.000679222	0.0018892	down
A07G163000v1	D07G166400v1	32.9687	-1.63928	0.56741	-2.88906	0.00386398	0.00915368	down
A06G173100v1	D06G182500v1	37.8364	-8.67562	1.51512	-5.72601	1.02819e-08	5.67424e-08	down
A12G253800v1	D12G263700v1	112.819	1.44123	0.309506	4.65654	3.21565e-06	1.29615e-05	up
A05G380700v1	D04G096200v1	60.3705	-2.32174	0.42602	-5.44984	5.04166e-08	2.54431e-07	down
A12G231400v1	D12G241300v1	135.083	1.07938	0.27083	3.98546	6.73501e-05	0.000224299	up
A09G136900v1	D09G133900v1	591.541	2.08225	0.14725	14.1409	2.12528e-45	7.62559e-44	up
A01G203400v1	D01G216300v1	42.3227	-1.73013	0.490803	-3.5251	0.000423323	0.00122378	down
A02G144500v1	D03G071400v1	106.938	-10.1748	1.46826	-6.92979	4.21454e-12	3.23321e-11	down
A10G026800v1	D10G026600v1	208.401	1.46838	0.214922	6.83213	8.36614e-12	6.21554e-11	up
A05G125800v1	D05G126900v1	514.166	1.14909	0.305515	3.76116	0.000169127	0.000525062	up
A02G048900v1	D02G056700v1	251.158	1.10536	0.196073	5.63747	1.72565e-08	9.27259e-08	up
A12G117600v1	D12G122500v1	262.038	-4.19467	0.262895	-15.9557	2.60068e-57	1.29661e-55	down
A10G225000v1	D10G233800v1	1286.14	-1.63927	0.0946225	-17.3243	3.08539e-67	1.98035e-65	down
A05G163200v1	D05G168500v1	351.699	2.41013	0.198318	12.1529	5.53732e-34	1.41418e-32	up
A05G113700v1	D05G114100v1	207.932	-4.05621	0.299517	-13.5425	8.77426e-42	2.85352e-40	down
A02G087400v1	D02G098300v1	18.5754	2.70498	0.782734	3.45581	0.000548646	0.00155386	up
A10G203500v1	D10G211400v1	339.077	-2.89124	0.19814	-14.5919	3.16196e-48	1.24025e-46	down
A01G103900v1	D01G107100v1	166.459	-3.22499	0.281244	-11.4669	1.93542e-30	4.29621e-29	down
A05G142900v1	D05G146100v1	258.61	-2.34792	0.208718	-11.2493	2.33565e-29	4.92489e-28	down
A09G186500v1	D09G185100v1	461.228	-1.53159	0.150085	-10.2048	1.88615e-24	3.17312e-23	down
A10G233700v1	D10G243400v1	229.229	1.00157	0.202761	4.93968	7.82509e-07	3.42604e-06	up
A07G233300v1	D07G242000v1	539.796	4.04216	0.180006	22.4557	1.12669e-111	1.67753e-109	up
A10G242800v1	D10G253000v1	233.557	1.2205	0.200556	6.08558	1.16069e-09	7.06062e-09	up
A12G299500v1	D12G308500v1	381.255	-1.14491	0.157764	-7.25712	3.95405e-13	3.30819e-12	down
A11G157400v1	D11G159000v1	65.7561	-1.44615	0.401257	-3.60406	0.000313284	0.000929237	down
A10G160400v1	D10G156600v1	152.411	-9.24142	1.4558	-6.348	2.18136e-10	1.41714e-09	down
A13G193200v1	D13G204400v1	75.7796	1.86748	0.372198	5.01743	5.23677e-07	2.33722e-06	up
A03G068300v1	D03G148200v1	742.888	-1.07571	0.114582	-9.38811	6.10854e-21	8.54298e-20	down
A02G194000v1	D03G019800v1	180.118	1.16441	0.228909	5.08677	3.6421e-07	1.66072e-06	up
A10G148600v1	D10G166200v1	4975.05	-1.10601	0.0490231	-22.5609	1.04868e-112	1.60507e-110	down
A07G057600v1	D07G058800v1	37.8634	3.20444	0.584363	5.48365	4.16641e-08	2.12367e-07	up
A05G453900v1	D04G012100v1	115.832	-2.16336	0.305132	-7.08992	1.34193e-12	1.0818e-11	down
A03G164000v1	D02G196300v1	24.9876	-2.60387	0.681885	-3.81864	0.000134191	0.000423694	down
A10G070700v1	D10G069800v1	91.0527	-1.99161	0.354986	-5.61039	2.01876e-08	1.0761e-07	down
A10G016300v1	D10G015400v1	37.6648	-2.96268	0.573602	-5.16504	2.40382e-07	1.11989e-06	down
A13G098000v1	D13G117600v1	4.51875	5.63647	1.97294	2.85689	0.00427817	0.010036	up
A12G252300v1	D12G262100v1	1620.12	1.11824	0.0806924	13.8581	1.13647e-43	3.87443e-42	up
A05G144500v1	D05G147700v1	641.187	-1.3506	0.132668	-10.1804	2.42674e-24	4.05142e-23	down
A08G235000v1	D08G249900v1	1080.04	1.36892	0.101964	13.4255	4.28429e-41	1.36891e-39	up
A06G012700v1	D06G011600v1	125.169	10.4277	1.46583	7.11387	1.12833e-12	9.16697e-12	up
A02G206500v1	D03G007000v1	538.895	3.55549	0.165474	21.4867	2.07523e-102	2.6718e-100	up
A10G025200v1	D10G025000v1	122.199	1.32574	0.281808	4.7044	2.54609e-06	1.03928e-05	up
A06G107700v1	D06G109200v1	237.562	-1.3175	0.209487	-6.28916	3.19184e-10	2.04501e-09	down
A01G262600v1	D04G122900v1	276.577	4.79294	0.287229	16.6869	1.63331e-62	9.33375e-61	up
A01G170600v1	D01G181100v1	144.26	-2.14084	0.269714	-7.93744	2.06399e-15	2.04687e-14	down
A08G244800v1	D08G259500v1	533.85	-3.74891	0.17111	-21.9094	2.11384e-106	2.9282e-104	down
A06G021600v1	D06G021200v1	26.933	-8.18536	1.54208	-5.308	1.10835e-07	5.38122e-07	down
A09G097600v1	D09G099900v1	38.7143	-7.2579	1.50724	-4.81537	1.46926e-06	6.20566e-06	down
A08G103100v1	D08G108700v1	8.74768	6.59018	1.74972	3.76641	0.000165609	0.000514798	up
A06G237700v1	D06G250800v1	62.6824	-2.66222	0.428326	-6.21541	5.11895e-10	3.2232e-09	down
A11G118900v1	D11G119700v1	14.8823	5.88978	1.61675	3.64298	0.000269502	0.000809468	up
A09G005200v1	D09G004600v1	65.3813	-4.64419	0.575738	-8.0665	7.23398e-16	7.40206e-15	down
A07G182700v1	D07G188800v1	451.424	-2.78946	0.164081	-17.0004	8.15221e-65	4.99797e-63	down
A04G107500v1	D04G142100v1	188.846	-1.08598	0.23589	-4.60375	4.1495e-06	1.64738e-05	down
A08G161400v1	D08G181100v1	9.84804	-3.13694	1.15399	-2.71834	0.00656098	0.0147403	down
A01G224900v1	D01G238700v1	447.359	-1.0811	0.145175	-7.44687	9.55799e-14	8.44212e-13	down
A05G389400v1	D04G077700v1	12.5685	-5.61643	1.64169	-3.42112	0.000623636	0.00174658	down
A10G139800v1	D10G177400v1	18.841	1.90423	0.762589	2.49706	0.0125226	0.0262055	up
A12G286300v1	D12G295700v1	131.879	-9.03167	1.45737	-6.19723	5.74646e-10	3.59968e-09	down
A06G134500v1	D06G141600v1	53.6829	1.56488	0.435636	3.59218	0.000327921	0.000968054	up
A09G243800v1	D09G243800v1	50.0318	4.8036	0.672817	7.13953	9.36537e-13	7.65136e-12	up
A07G170500v1	D07G176000v1	110.79	-10.226	1.46778	-6.96695	3.23881e-12	2.50841e-11	down
A13G245100v1	D13G257200v1	312.735	-1.47456	0.179987	-8.19258	2.55675e-16	2.70729e-15	down
A06G162600v1	D06G173600v1	9.06962	4.11034	1.3891	2.95899	0.0030865	0.00746208	up
A13G179300v1	D13G191600v1	28.4991	-2.12145	0.692649	-3.06281	0.00219271	0.00548291	down
A08G277500v1	D08G291900v1	75.1459	-3.88387	0.467103	-8.31481	9.19024e-17	1.00523e-15	down
A08G288200v1	D08G303100v1	193.643	-1.71366	0.225999	-7.58261	3.38666e-14	3.08464e-13	down
A05G280000v1	D05G287300v1	21.9718	-7.89179	1.56359	-5.04723	4.48257e-07	2.01956e-06	down
A08G009100v1	D08G009100v1	1006.47	-1.19447	0.101634	-11.7527	6.83949e-32	1.6131e-30	down
A07G005900v1	D07G006700v1	18.2642	1.85273	0.747629	2.47814	0.0132069	0.0274771	up
A04G191900v1	D04G230500v1	88.5303	1.998	0.362452	5.51245	3.53868e-08	1.82195e-07	up
A11G274500v1	D11G280500v1	50.9761	9.13144	1.50189	6.07998	1.20199e-09	7.29963e-09	up
A02G038700v1	D02G047800v1	109.356	1.09565	0.295542	3.70725	0.00020952	0.000639935	up
A07G088600v1	D07G089200v1	106.222	1.64878	0.312999	5.2677	1.38145e-07	6.62631e-07	up
A06G086600v1	D06G086800v1	127.411	1.5573	0.280927	5.54345	2.96575e-08	1.54404e-07	up
A13G099100v1	D13G116000v1	7.91425	-3.87212	1.432	-2.70399	0.00685119	0.0153231	down
A06G255100v1	D04G209300v1	147.075	-2.25858	0.275409	-8.20081	2.38771e-16	2.54059e-15	down
A06G064700v1	D06G064400v1	294.595	7.87823	1.43913	5.4743	4.39251e-08	2.23423e-07	up
A04G109000v1	D04G143700v1	176.757	-1.67747	0.252443	-6.64495	3.03328e-11	2.13608e-10	down
A08G162400v1	D08G182700v1	78.051	-1.34225	0.359441	-3.73427	0.000188261	0.000579877	down
A04G139600v1	D04G175700v1	472.096	3.18012	0.167398	18.9973	1.79478e-80	1.53446e-78	up
A01G001600v1	D01G000600v1	279.414	-2.20686	0.197039	-11.2001	4.07156e-29	8.49516e-28	down
A09G147600v1	D09G144200v1	201.12	1.70791	0.239749	7.12373	1.05044e-12	8.5564e-12	up
A08G142200v1	D08G160300v1	168.045	-1.5635	0.244038	-6.40677	1.48634e-10	9.78684e-10	down
A11G107600v1	D11G108500v1	87.6797	1.0811	0.325912	3.31716	0.000909368	0.00247093	up
A11G169400v1	D11G171300v1	438.317	-1.14664	0.157381	-7.28578	3.19819e-13	2.69641e-12	down
A04G149800v1	D04G185300v1	6.2107	-4.56909	1.84157	-2.48109	0.0130981	0.027287	down
A07G164700v1	D07G168700v1	3.29948	5.18098	2.17419	2.38294	0.0171748	0.0346553	up
A09G233100v1	D09G232600v1	105.636	-1.00229	0.301947	-3.31942	0.000902033	0.00245222	down
A05G424700v1	D04G044100v1	70.9694	-1.49801	0.386629	-3.87454	0.000106825	0.00034348	down
A06G213900v1	D06G228000v1	504.621	1.19393	0.142048	8.40512	4.27436e-17	4.77067e-16	up
A12G233600v1	D12G243600v1	322.707	-1.82619	0.184907	-9.87624	5.2778e-23	8.19257e-22	down
A11G094400v1	D11G094100v1	77.3248	-1.11573	0.350468	-3.18356	0.00145478	0.00378022	down
A07G048800v1	D07G049900v1	3107.11	1.22208	0.0638792	19.1312	1.38904e-81	1.21123e-79	up
A11G344100v1	D11G357300v1	179.666	-1.41397	0.230544	-6.13317	8.61429e-10	5.29907e-09	down
A05G196600v1	D05G203200v1	40.5052	-1.55007	0.495507	-3.12826	0.00175846	0.00449097	down
A07G027000v1	D07G027500v1	558.533	-1.3362	0.13476	-9.91538	3.56899e-23	5.60362e-22	down
A05G106500v1	D05G106800v1	164.418	-2.65067	0.275928	-9.60637	7.51488e-22	1.09725e-20	down
A13G178100v1	D13G190000v1	714.589	1.55029	0.121584	12.7508	3.0853e-37	8.70204e-36	up
A07G058500v1	D07G059500v1	270.471	-11.5136	1.45323	-7.92275	2.32318e-15	2.29871e-14	down
A05G136700v1	D05G138800v1	263.822	-1.96603	0.19931	-9.86416	5.95328e-23	9.20845e-22	down
A13G095700v1	D13G093600v1	231.159	1.60824	0.216428	7.43083	1.0792e-13	9.48614e-13	up
A06G003600v1	D06G002700v1	34.8051	-5.07071	0.862671	-5.87792	4.1545e-09	2.39351e-08	down
A03G166600v1	D02G197000v1	73.7422	1.54803	0.372805	4.15239	3.29018e-05	0.000114706	up
A05G049000v1	D05G050800v1	34.9147	-1.74222	0.533871	-3.26338	0.00110091	0.00293885	down
A04G022600v1	D05G442400v1	276.287	-1.27651	0.185376	-6.88606	5.73583e-12	4.33944e-11	down
A11G179800v1	D11G182500v1	725.305	-1.57606	0.124522	-12.6568	1.0254e-36	2.83014e-35	down
A07G256100v1	D07G266700v1	15.2552	2.73912	0.932408	2.93768	0.00330673	0.00795236	up
A04G160300v1	D04G196500v1	151.634	-1.85754	0.281335	-6.6026	4.04016e-11	2.81614e-10	down
A05G317800v1	D05G323600v1	24.2351	-2.02528	0.658392	-3.07609	0.00209733	0.00526122	down
A11G188300v1	D11G192100v1	4.174	-5.49654	2.02847	-2.7097	0.00673443	0.0150928	down
A09G014800v1	D09G014200v1	878.693	-1.12192	0.104984	-10.6865	1.17701e-26	2.17028e-25	down
A05G068200v1	D05G070000v1	10.1418	-3.64763	1.23321	-2.95783	0.00309816	0.00748861	down
A07G173400v1	D07G179900v1	12.5571	2.20785	0.938066	2.35362	0.0185914	0.037171	up
A13G265500v1	D13G279600v1	890.344	-1.26401	0.104978	-12.0407	2.17168e-33	5.43219e-32	down
A05G461900v1	D04G004800v1	162.259	-2.57133	0.267119	-9.62616	6.20054e-22	9.12651e-21	down
A03G232800v1	D02G263000v1	57.0332	-1.19847	0.412526	-2.90519	0.00367033	0.00874415	down
A12G055500v1	D12G057200v1	37.1883	1.6279	0.553298	2.94218	0.0032591	0.00784556	up
A10G179900v1	D10G136500v1	22.0517	-3.13512	0.784915	-3.99422	6.49083e-05	0.000216807	down
A05G227700v1	D05G236800v1	53.4472	-1.93964	0.44133	-4.39498	1.1078e-05	4.14046e-05	down
A12G244700v1	D12G254800v1	100.875	2.87662	0.346368	8.3051	9.97351e-17	1.08764e-15	up
A09G202700v1	D09G202900v1	168.447	6.81691	0.630057	10.8195	2.78286e-27	5.2598e-26	up
A08G048400v1	D08G053400v1	11.1375	3.80641	1.21218	3.14014	0.00168869	0.00432993	up
A03G093300v1	D03G128100v1	31.1921	1.62045	0.576312	2.81175	0.00492722	0.0113782	up
A02G175300v1	D03G040100v1	69.9114	1.1349	0.416308	2.72611	0.0064085	0.0144189	up
A12G287000v1	D12G296400v1	1406.63	1.49954	0.0854333	17.5522	5.72007e-69	3.80533e-67	up
A12G232100v1	D12G242000v1	90.5281	1.01099	0.383703	2.63483	0.00841792	0.0183992	up
A08G246000v1	D08G260600v1	148.296	-1.64795	0.274089	-6.01245	1.82736e-09	1.08683e-08	down
A02G145100v1	D03G072100v1	4.66799	-5.65781	1.97163	-2.86962	0.0041097	0.00968235	down
A11G205600v1	D11G208800v1	407.159	10.6862	1.44449	7.39795	1.383e-13	1.20501e-12	up
A10G246600v1	D10G256900v1	126.946	-6.15118	0.600036	-10.2513	1.16707e-24	1.98783e-23	down
A06G023900v1	D06G023500v1	3.2216	-5.12134	2.15703	-2.37426	0.0175841	0.0353866	down
A04G192700v1	D04G231200v1	354.796	1.88413	0.175656	10.7263	7.66411e-27	1.42156e-25	up
A08G125500v1	D08G141800v1	42.2337	1.7667	0.510564	3.46029	0.000539594	0.0015302	up
A12G147400v1	D12G155200v1	37.5632	-3.96236	0.660172	-6.00202	1.94883e-09	1.15719e-08	down
A09G178200v1	D09G176200v1	121.975	1.18224	0.279707	4.22671	2.37133e-05	8.43648e-05	up
A08G222500v1	D08G239400v1	11.5681	2.76634	1.00051	2.76495	0.00569318	0.0129758	up
A04G101300v1	D04G134800v1	34.8437	-3.68844	0.660194	-5.5869	2.31162e-08	1.22268e-07	down
A08G154800v1	D08G173800v1	32.9943	1.66598	0.548809	3.03563	0.00240035	0.00595252	up
A04G131200v1	D04G166800v1	95.4889	-1.04365	0.328549	-3.17653	0.00149051	0.00386709	down
A10G256900v1	D10G266500v1	422.814	1.99726	0.15982	12.4969	7.75938e-36	2.08893e-34	up
A08G199100v1	D08G217000v1	184.511	2.98011	0.26694	11.164	6.11814e-29	1.26687e-27	up
A09G007900v1	D09G006900v1	4.55279	5.64603	1.9829	2.84735	0.00440843	0.0102964	up
A10G234400v1	D10G244100v1	221.117	1.27977	0.213492	5.99448	2.04134e-09	1.21179e-08	up
A07G254800v1	D07G265100v1	13.3137	5.72706	1.62959	3.51442	0.000440722	0.00126972	up
A03G194000v1	D02G223700v1	89.2489	2.27398	0.349589	6.50471	7.78449e-11	5.26024e-10	up
A03G225400v1	D02G255700v1	15.3687	-3.83069	1.01747	-3.76491	0.00016661	0.000517688	down
A11G389700v1	D11G403200v1	381.271	1.07588	0.188615	5.70412	1.16949e-08	6.4168e-08	up
A10G137500v1	D10G179700v1	13.0277	7.16441	1.64858	4.34581	1.38764e-05	5.12078e-05	up
A05G439900v1	D04G025600v1	491.919	1.30734	0.1411	9.2654	1.94353e-20	2.65697e-19	up
A05G236600v1	D09G067000v1	4.01572	5.46625	2.0308	2.69167	0.00710942	0.0158488	up
A05G346100v1	D05G354000v1	7.28115	6.3247	1.78818	3.53695	0.000404779	0.00117545	up
A08G059100v1	D08G064600v1	141.309	2.9136	0.293241	9.93583	2.9075e-23	4.58146e-22	up
A05G410100v1	D04G057600v1	130.232	-5.27775	0.471123	-11.2025	3.9646e-29	8.2878e-28	down
A08G091500v1	D08G096600v1	6.91394	-4.72419	1.78552	-2.64583	0.00814898	0.0178875	down
A05G463400v1	D04G003200v1	368.442	2.30587	0.171136	13.4739	2.22797e-41	7.17111e-40	up
A11G336700v1	D11G338800v1	52.4771	1.80493	0.502871	3.58924	0.000331637	0.000978241	up
A13G194000v1	D13G205100v1	15.7932	2.4259	0.841419	2.8831	0.0039378	0.00931848	up
A12G243000v1	D12G253200v1	354.604	-1.25703	0.164503	-7.64136	2.14935e-14	1.99081e-13	down
A09G102200v1	D09G104900v1	72.2234	-9.60886	1.48247	-6.48166	9.07188e-11	6.09816e-10	down
A12G183300v1	D12G188800v1	13.3411	4.69559	1.281	3.66557	0.000246789	0.000745441	up
A07G068200v1	D07G069100v1	317.04	1.47276	0.180034	8.18049	2.82695e-16	2.97611e-15	up
A13G026200v1	D13G030300v1	63.9852	3.58224	0.504821	7.09607	1.28359e-12	1.03782e-11	up
A01G003800v1	D01G002900v1	1369.24	1.00913	0.0917148	11.0029	3.70051e-28	7.33633e-27	up
A01G115000v1	D01G119000v1	185.616	1.10702	0.23062	4.80021	1.58496e-06	6.6558e-06	up
A05G154500v1	D05G158000v1	97.28	2.21332	0.342876	6.45516	1.08103e-10	7.19603e-10	up
A01G084000v1	D01G085400v1	229.864	1.15733	0.202839	5.70567	1.15885e-08	6.36002e-08	up
A05G308000v1	D05G314700v1	249.384	2.86722	0.238557	12.019	2.82267e-33	7.02842e-32	up
A08G070600v1	D08G075800v1	17.5686	-7.56874	1.59525	-4.74456	2.08955e-06	8.62743e-06	down
A12G206000v1	D12G213900v1	461.031	-3.10453	0.171682	-18.083	4.33438e-73	3.14128e-71	down
A03G256000v1	D02G286100v1	219.826	-1.8009	0.21785	-8.26671	1.37709e-16	1.48748e-15	down
A09G212000v1	D09G212500v1	133.579	1.76391	0.278123	6.34218	2.26535e-10	1.46778e-09	up
A03G158000v1	D02G189700v1	122.035	1.34978	0.295136	4.5734	4.79881e-06	1.8894e-05	up
A12G193400v1	D12G201100v1	509.892	1.32852	0.137589	9.65569	4.65018e-22	6.90024e-21	up
A01G155900v1	D01G164900v1	148.707	-1.19564	0.258139	-4.63174	3.62598e-06	1.45378e-05	down
A07G005200v1	D07G007400v1	43.2538	2.16283	0.498812	4.33596	1.45125e-05	5.3375e-05	up
A13G115100v1	D13G107100v1	625.579	-2.61648	0.137986	-18.9619	3.52497e-80	2.95598e-78	down
A13G093600v1	D13G095900v1	165.304	-1.20112	0.249455	-4.81497	1.47224e-06	6.21585e-06	down
A07G069200v1	D07G070200v1	9.18504	-6.63259	1.73712	-3.81816	0.000134451	0.000424208	down
A04G041400v1	D05G422300v1	45.4669	1.11339	0.490179	2.27139	0.0231231	0.0450222	up
A11G111100v1	D11G111900v1	139.895	-1.41384	0.264041	-5.35463	8.57327e-08	4.2167e-07	down
A02G025300v1	D02G026100v1	12.3782	-7.06346	1.65616	-4.26497	1.99932e-05	7.19367e-05	down
A01G022900v1	D01G023700v1	202.353	1.44039	0.22893	6.29186	3.13688e-10	2.01222e-09	up
A08G233800v1	D08G249000v1	93.3688	2.08886	0.334478	6.24514	4.2343e-10	2.68315e-09	up
A05G030600v1	D13G083100v1	57.376	2.44574	0.439829	5.56068	2.6873e-08	1.4071e-07	up
A12G015500v1	D12G017900v1	846.204	1.61036	0.112814	14.2745	3.15766e-46	1.16546e-44	up
A04G008400v1	D05G454300v1	34.301	2.48299	0.598066	4.1517	3.30019e-05	0.000115018	up
A02G050600v1	D02G058100v1	165.255	1.15659	0.244453	4.73133	2.23056e-06	9.1733e-06	up
A05G094400v1	D05G094700v1	75.78	-1.2042	0.361268	-3.33326	0.00085835	0.00234131	down
A01G002300v1	D01G001300v1	119.17	1.07621	0.288688	3.72794	0.000193052	0.000593362	up
A03G257700v1	D02G287700v1	53.7258	1.32855	0.420125	3.16228	0.00156539	0.00403934	up
A05G009100v1	D05G009500v1	30.6487	-3.64545	0.698511	-5.21888	1.80008e-07	8.52592e-07	down
A09G048600v1	D09G048500v1	120.523	-2.43241	0.304148	-7.99747	1.27001e-15	1.27801e-14	down
A12G094600v1	D12G090300v1	15.0747	4.88831	1.25454	3.89648	9.7599e-05	0.00031656	up
A08G113400v1	D08G120100v1	695.752	2.3685	0.127227	18.6163	2.37125e-77	1.85356e-75	up
A03G033500v1	D03G183600v1	52.7725	-1.33298	0.476431	-2.79784	0.00514461	0.0118427	down
A05G306000v1	D05G313100v1	27.4278	8.23771	1.5405	5.34742	8.92162e-08	4.37623e-07	up
A06G215700v1	D06G231400v1	764.79	-1.77009	0.117521	-15.0618	2.88606e-51	1.23373e-49	down
A05G018400v1	D05G019100v1	221.302	3.90726	0.271601	14.386	6.33312e-47	2.39401e-45	up
A12G040500v1	D12G037100v1	156.873	-1.31458	0.246569	-5.33147	9.74204e-08	4.75947e-07	down
A01G226900v1	D01G240500v1	118.87	-2.25275	0.298932	-7.536	4.84596e-14	4.37556e-13	down
A11G085400v1	D11G085200v1	55.4227	-2.08778	0.436611	-4.78178	1.73753e-06	7.25334e-06	down
A07G114700v1	D07G115000v1	154.177	-3.40245	0.301832	-11.2727	1.79022e-29	3.80413e-28	down
A06G110000v1	D06G112600v1	257.837	2.2448	0.204039	11.0018	3.74598e-28	7.41976e-27	up
A07G144500v1	D07G147000v1	394.41	-1.03718	0.167827	-6.18008	6.40696e-10	3.98605e-09	down
A07G081600v1	D07G081400v1	42.1372	-5.78137	0.946712	-6.10679	1.01656e-09	6.21664e-09	down
A11G237600v1	D11G241900v1	9.17081	-6.63059	1.72901	-3.8349	0.000125618	0.000398578	down
A01G148700v1	D01G153700v1	450.664	1.00672	0.152462	6.60313	4.02565e-11	2.80769e-10	up
A10G081600v1	D10G092400v1	75.9895	1.33887	0.371059	3.60824	0.000308284	0.000915773	up
A13G008100v1	D13G011800v1	265.974	1.39772	0.195926	7.13393	9.75439e-13	7.96324e-12	up
A07G028000v1	D07G028200v1	159.528	-4.94317	0.398443	-12.4062	2.41782e-35	6.42218e-34	down
A03G001800v1	D03G218800v1	241.94	-1.00052	0.208908	-4.78927	1.67386e-06	7.01162e-06	down
A12G149600v1	D12G157500v1	228.137	1.45535	0.21402	6.80005	1.04579e-11	7.69646e-11	up
A02G063200v1	D02G069300v1	6.5564	6.17268	1.82548	3.38139	0.000721189	0.00199276	up
A08G200400v1	D08G219300v1	251.442	-4.13351	0.272996	-15.1413	8.6539e-52	3.73585e-50	down
A04G022000v1	D05G443100v1	212.889	2.61549	0.231608	11.2928	1.42507e-29	3.04594e-28	up
A08G136900v1	D08G153700v1	56.3521	-1.22958	0.406584	-3.02416	0.00249324	0.00615422	down
A09G189300v1	D09G188100v1	16.4859	-2.85553	0.893625	-3.19544	0.00139616	0.00364173	down
A07G256800v1	D07G267400v1	21.3356	-1.59419	0.706921	-2.25511	0.0241263	0.0466765	down
A06G013800v1	D06G013000v1	41.0601	-1.26598	0.517321	-2.44719	0.0143974	0.0296022	down
A01G022400v1	D01G022100v1	20.1637	7.79355	1.57679	4.94267	7.70611e-07	3.37868e-06	up
A12G014600v1	D12G016300v1	19.5403	-2.44129	0.807528	-3.02317	0.00250143	0.00617166	down
A11G392000v1	D11G405500v1	18.3437	2.22768	0.788515	2.82517	0.00472562	0.0109658	up
A01G051000v1	D01G054100v1	1929.76	1.5162	0.0739851	20.4933	2.47074e-93	2.70385e-91	up
A13G248600v1	D13G260600v1	301.216	1.57082	0.187177	8.39214	4.77372e-17	5.31447e-16	up
A08G061000v1	D08G066900v1	97.3588	1.00612	0.316508	3.17882	0.00147875	0.00383796	up
A01G084500v1	D01G086100v1	14.2874	2.63969	0.885233	2.98192	0.00286447	0.00696917	up
A03G183600v1	D02G213200v1	159.355	-6.29054	0.557638	-11.2807	1.63447e-29	3.48331e-28	down
A12G268700v1	D12G277900v1	31.0869	2.00769	0.582897	3.44433	0.000572487	0.00161573	up
A11G023600v1	D11G023500v1	55.6505	1.88365	0.425605	4.42581	9.60832e-06	3.62269e-05	up
A03G085600v1	D03G119200v1	6.28829	4.61504	1.8178	2.53881	0.0111232	0.0235881	up
A09G203400v1	D09G203600v1	11.1112	-6.90812	1.67482	-4.12469	3.71233e-05	0.000128502	down
A12G278100v1	D12G287500v1	19.5542	-2.31535	0.738647	-3.13458	0.001721	0.00440503	down
A13G205600v1	D13G217000v1	9.08352	-5.13236	1.73901	-2.95131	0.00316433	0.0076376	down
A01G181600v1	D01G196900v1	105.901	2.09981	0.325286	6.45527	1.08029e-10	7.19328e-10	up
A11G319500v1	D11G328300v1	418.026	-1.01321	0.150281	-6.74215	1.5606e-11	1.13065e-10	down
A08G269500v1	D08G283700v1	50.6806	-1.23268	0.441452	-2.79234	0.00523288	0.0120256	down
A01G164700v1	D01G174500v1	237.846	-3.09863	0.235483	-13.1586	1.51796e-39	4.59524e-38	down
A01G142600v1	D01G152100v1	138.29	-1.84373	0.273334	-6.74533	1.52675e-11	1.10723e-10	down
A11G206300v1	D11G209500v1	53.2984	7.74576	1.49783	5.17133	2.3244e-07	1.08497e-06	up
A11G333700v1	D13G096600v1	77.5714	2.29812	0.37709	6.09436	1.09877e-09	6.69324e-09	up
A05G021100v1	D05G021800v1	65.0936	-2.99177	0.451921	-6.62011	3.58921e-11	2.51624e-10	down
A11G120600v1	D11G121500v1	16.0317	-3.55308	0.952914	-3.72864	0.000192515	0.000592043	down
A11G215300v1	D11G219100v1	325.543	1.21285	0.173973	6.97145	3.13688e-12	2.43292e-11	up
A03G185000v1	D02G214800v1	324.319	-1.85754	0.178813	-10.3881	2.80836e-25	4.90556e-24	down
A09G090800v1	D09G092800v1	233.506	1.47723	0.204709	7.21623	5.34484e-13	4.44293e-12	up
A09G101300v1	D09G104000v1	445.404	2.78045	0.165776	16.7723	3.89039e-63	2.2646e-61	up
A13G257900v1	D13G271800v1	338.329	1.23368	0.169059	7.29731	2.93577e-13	2.48762e-12	up
A04G076800v1	D04G113100v1	609.395	-1.04384	0.128093	-8.1491	3.66638e-16	3.82671e-15	down
A09G008700v1	D09G007600v1	57.6493	-1.30303	0.408954	-3.18625	0.00144131	0.00374833	down
A07G207100v1	D07G215300v1	1144.26	1.41323	0.0951886	14.8466	7.32015e-50	3.00593e-48	up
A03G074200v1	D03G142700v1	592.318	-1.63891	0.132702	-12.3503	4.8534e-35	1.27523e-33	down
A07G175100v1	D07G181700v1	2567.39	-1.27104	0.065815	-19.3123	4.23226e-83	3.85964e-81	down
A12G067800v1	D12G069100v1	83.334	-1.16111	0.362813	-3.2003	0.00137284	0.00358774	down
A03G158900v1	D02G190800v1	1468.51	1.37952	0.0873684	15.7897	3.66227e-56	1.75781e-54	up
A09G214300v1	D09G214800v1	208.801	-11.1402	1.4561	-7.65071	1.99872e-14	1.85758e-13	down
A11G098700v1	D11G098700v1	158.482	-1.66555	0.249112	-6.68595	2.29438e-11	1.63467e-10	down
A13G216000v1	D13G228200v1	337.538	1.17791	0.167039	7.05169	1.76755e-12	1.40626e-11	up
A10G042400v1	D10G041900v1	17.1193	2.94042	0.853446	3.44535	0.000570314	0.00161002	up
A05G409300v1	D04G058300v1	7.5463	3.84342	1.45495	2.64161	0.00825136	0.0180778	up
A11G335300v1	D11G339500v1	1148.61	-3.21074	0.1139	-28.1891	7.95254e-175	2.52257e-172	down
A07G094200v1	D07G094900v1	415.49	1.27691	0.160202	7.97066	1.57829e-15	1.57592e-14	up
A02G212000v1	D03G001500v1	261.608	4.91598	0.306252	16.0521	5.52774e-58	2.78769e-56	up
A08G164400v1	D03G033500v1	4.55279	5.64603	1.9829	2.84735	0.00440843	0.0102964	up
A07G008700v1	D07G009700v1	453.952	2.49428	0.157483	15.8384	1.69195e-56	8.19285e-55	up
A11G308400v1	D11G317100v1	31.1824	3.53534	0.682034	5.18352	2.17736e-07	1.01981e-06	up
A08G267800v1	D08G282100v1	168.78	3.40249	0.286813	11.8631	1.84032e-32	4.45564e-31	up
A07G208500v1	D07G216900v1	65.9599	-1.72333	0.385689	-4.46819	7.88829e-06	3.01258e-05	down
A13G080800v1	D13G085400v1	12.337	7.08496	1.65403	4.28346	1.84012e-05	6.65807e-05	up
A11G162800v1	D11G164700v1	4.80856	5.72479	1.96142	2.9187	0.00351495	0.00840691	up
A04G006600v1	D05G456600v1	7.97273	3.92998	1.46274	2.68672	0.0072157	0.0160629	up
A07G239500v1	D07G248900v1	68.9501	1.39289	0.377759	3.68724	0.000226703	0.000689145	up
A06G097500v1	D06G099400v1	13.5733	7.22303	1.63499	4.41779	9.97167e-06	3.75387e-05	up
A06G043400v1	D06G045000v1	4.70356	-5.66749	1.95643	-2.89685	0.00376929	0.00895263	down
A04G120200v1	D04G156300v1	337.926	1.70609	0.172768	9.87504	5.34114e-23	8.28501e-22	up
A05G073100v1	D05G074600v1	114.951	-1.14764	0.300631	-3.81744	0.000134845	0.000425268	down
A08G174300v1	D08G195300v1	249.893	-3.37854	0.245276	-13.7744	3.63312e-43	1.22524e-41	down
A03G031100v1	D03G185900v1	129.278	1.96386	0.291358	6.74036	1.57993e-11	1.14276e-10	up
A07G227300v1	D07G236100v1	28.7922	8.30858	1.54419	5.38055	7.42573e-08	3.67958e-07	up
A07G107900v1	D07G107700v1	81.6079	2.32019	0.376878	6.15633	7.44499e-10	4.61218e-09	up
A01G229000v1	D01G242800v1	259.808	-1.57542	0.201252	-7.82807	4.95404e-15	4.78505e-14	down
A05G397500v1	D04G069500v1	3.00115	5.0467	2.20595	2.28777	0.0221512	0.0433652	up
A05G421600v1	D04G047100v1	23.9555	1.69579	0.675375	2.51089	0.0120428	0.0253175	up
A10G187200v1	D10G128300v1	22.5629	1.83474	0.661735	2.77262	0.00556075	0.0126964	up
A07G146900v1	D07G149300v1	337.105	-1.10789	0.168809	-6.56301	5.27323e-11	3.62713e-10	down
A05G349500v1	D05G357000v1	223.422	-1.11886	0.230792	-4.84793	1.24755e-06	5.32107e-06	down
A08G081800v1	D08G086100v1	3.51269	5.27321	2.10287	2.50763	0.0121544	0.0255204	up
A05G283700v1	D05G291400v1	192.987	1.22431	0.22892	5.34823	8.88203e-08	4.35779e-07	up
A08G013300v1	D08G013200v1	29.3679	2.05746	0.594304	3.46197	0.000536247	0.00152189	up
A02G191700v1	D03G022300v1	298.786	-11.6573	1.45249	-8.02569	1.00957e-15	1.02362e-14	down
A07G060400v1	D07G061300v1	153.856	1.03763	0.248302	4.17892	2.92902e-05	0.000102885	up
A06G120300v1	D06G124500v1	195.977	11.0747	1.45692	7.60148	2.92757e-14	2.68436e-13	up
A09G245000v1	D09G245200v1	92.9964	-1.27671	0.3267	-3.90791	9.30999e-05	0.00030333	down
A05G138400v1	D05G140600v1	43.9896	-6.43197	1.10479	-5.8219	5.81827e-09	3.29567e-08	down
A10G010100v1	D10G009500v1	28.5993	2.54289	0.630764	4.03144	5.54365e-05	0.000187042	up
A05G229200v1	D05G238200v1	172.672	1.55429	0.254919	6.0972	1.07941e-09	6.57898e-09	up
A10G073300v1	D10G072300v1	88.5464	-9.90273	1.47443	-6.71632	1.86368e-11	1.33914e-10	down
A02G042500v1	D02G051900v1	61.1817	-2.18342	0.422053	-5.17334	2.29945e-07	1.07401e-06	down
A05G166100v1	D05G172600v1	61.0914	3.50669	0.48138	7.28466	3.22478e-13	2.71673e-12	up
A09G152000v1	D09G148800v1	733.585	6.19504	0.25251	24.5339	6.42803e-133	1.36592e-130	up
A13G019300v1	D13G023700v1	169.251	5.48273	0.432008	12.6913	6.61166e-37	1.83875e-35	up
A05G175800v1	D05G182200v1	19.6656	-2.45688	0.786347	-3.12442	0.00178159	0.004541	down
A04G018900v1	D05G445400v1	35.9544	-8.60271	1.52236	-5.65092	1.5959e-08	8.60967e-08	down
A12G070400v1	D12G071800v1	994.77	1.88491	0.106209	17.7472	1.81179e-70	1.23535e-68	up
A06G016000v1	D06G015300v1	18.7518	3.30197	0.851123	3.87955	0.000104649	0.00033696	up
A10G217800v1	D10G226300v1	20.387	-1.69907	0.713057	-2.38279	0.0171818	0.0346662	down
A03G175500v1	D02G205900v1	57.202	-2.27143	0.432761	-5.2487	1.53175e-07	7.31359e-07	down
A11G394300v1	D11G407800v1	137.662	1.00114	0.276642	3.61891	0.000295843	0.000881689	up
A08G109600v1	D08G111200v1	327.139	3.61674	0.225262	16.0557	5.21255e-58	2.6409e-56	up
A04G078000v1	D13G262900v1	674.837	-3.37624	0.315331	-10.707	9.44086e-27	1.74668e-25	down
A10G248600v1	D10G258300v1	80.0383	-2.31492	0.410507	-5.63917	1.7087e-08	9.1865e-08	down
A09G078400v1	D09G080000v1	178.779	2.20403	0.244868	9.00087	2.2394e-19	2.86129e-18	up
A09G056000v1	D09G049200v1	5.20849	-4.30414	1.89409	-2.2724	0.0230622	0.0449279	down
A11G026000v1	D11G025800v1	35.402	-2.218	0.561128	-3.95276	7.72542e-05	0.000254993	down
A08G042500v1	D08G046800v1	2024.11	-1.6561	0.0749902	-22.0843	4.47843e-108	6.36489e-106	down
A03G032900v1	D03G184300v1	542.647	1.05107	0.133516	7.87226	3.48304e-15	3.39872e-14	up
A13G096900v1	D13G121700v1	190.495	1.438	0.227587	6.31846	2.64184e-10	1.70415e-09	up
A13G146400v1	D13G153700v1	15.176	7.38304	1.63139	4.52561	6.02217e-06	2.34074e-05	up
A01G259000v1	D01G273200v1	247.242	1.13168	0.198032	5.71461	1.09954e-08	6.04514e-08	up
A05G239800v1	D05G249400v1	547.457	1.38071	0.135475	10.1916	2.16164e-24	3.62266e-23	up
A11G013100v1	D11G013000v1	286.157	1.27328	0.187333	6.79686	1.06926e-11	7.85332e-11	up
A08G032900v1	D08G034000v1	3.22871	-5.12417	2.16722	-2.3644	0.0180595	0.0362199	down
A13G174000v1	D13G185700v1	9.11388	-6.62266	1.72614	-3.83668	0.00012471	0.000395984	down
A02G095700v1	D02G106300v1	740.826	-9.93799	0.839669	-11.8356	2.55517e-32	6.14561e-31	down
A01G147900v1	D01G154400v1	498.699	-3.45177	0.170317	-20.2668	2.52599e-91	2.63268e-89	down
A06G168500v1	D06G177300v1	101.196	-1.16794	0.309379	-3.77511	0.00015994	0.00049833	down
A06G026800v1	D06G026500v1	511.648	-1.01763	0.151298	-6.72599	1.74399e-11	1.25644e-10	down
A11G261000v1	D04G105800v1	1209.97	3.86372	0.116149	33.2652	1.23271e-242	7.292e-240	up
A11G154900v1	D11G155800v1	587.152	-1.25411	0.128756	-9.74019	2.0318e-22	3.08178e-21	down
A01G182300v1	D01G196000v1	642.211	1.31081	0.123856	10.5833	3.56071e-26	6.42483e-25	up
A04G134000v1	D04G169800v1	27.0034	-1.86295	0.676335	-2.75448	0.00587847	0.0133467	down
A10G143400v1	D10G269500v1	10.1374	-6.77557	1.69675	-3.99326	6.51723e-05	0.000217609	down
A01G042400v1	D01G045200v1	7.29904	3.79202	1.46943	2.5806	0.00986286	0.0212031	up
A04G112200v1	D04G147400v1	605.678	-3.54324	0.167493	-21.1545	2.5062e-99	3.08164e-97	down
A10G237900v1	D10G247100v1	160.948	6.15912	0.531537	11.5874	4.77464e-31	1.08293e-29	up
A03G196400v1	D02G226700v1	25.9851	1.53569	0.609618	2.5191	0.0117656	0.0247991	up
A05G366900v1	D04G081800v1	107.285	-1.15968	0.295821	-3.92021	8.84711e-05	0.000289226	down
A04G143400v1	D04G179400v1	67.1854	5.47268	0.685952	7.97823	1.48449e-15	1.48632e-14	up
A03G174200v1	D02G204300v1	108.487	-3.2136	0.349377	-9.19809	3.64359e-20	4.9232e-19	down
A11G392700v1	D11G406200v1	60.9439	1.23203	0.429926	2.86569	0.00416101	0.00979373	up
A07G158600v1	D07G161600v1	189.388	-3.094	0.260422	-11.8807	1.49077e-32	3.62538e-31	down
A13G249400v1	D13G261300v1	256.548	2.51341	0.222194	11.3118	1.14766e-29	2.46264e-28	up
A05G231800v1	D05G240900v1	58.1868	1.26935	0.419171	3.02824	0.00245979	0.00607988	up
A11G047200v1	D11G046600v1	440.974	1.09499	0.152412	7.18442	6.74939e-13	5.54936e-12	up
A10G127000v1	D10G191100v1	483.077	2.06412	0.158045	13.0603	5.54894e-39	1.66369e-37	up
A03G122400v1	D02G139900v1	837.547	1.20975	0.10855	11.1447	7.60034e-29	1.55903e-27	up
A08G094000v1	D08G099600v1	403.714	-1.36805	0.156794	-8.72511	2.65911e-18	3.1873e-17	down
A05G460600v1	D04G006200v1	32.1485	-1.76892	0.572956	-3.08736	0.00201943	0.00508214	down
A05G241000v1	D05G250500v1	42.3837	3.72944	0.612171	6.09215	1.11405e-09	6.78253e-09	up
A08G072000v1	D08G077200v1	486.605	1.86326	0.145478	12.8079	1.48154e-37	4.23321e-36	up
A06G147100v1	D06G156500v1	17.5589	2.79065	0.819319	3.40606	0.000659069	0.00183712	up
A11G369600v1	D11G382200v1	11.5554	-6.96538	1.67851	-4.14974	3.32854e-05	0.00011595	down
A02G074900v1	D02G083900v1	74.7273	3.41359	0.432449	7.89363	2.93515e-15	2.88467e-14	up
A05G159700v1	D05G163700v1	77.8329	-1.54586	0.353715	-4.37035	1.24049e-05	4.60961e-05	down
A12G113700v1	D12G118900v1	71.5813	1.6505	0.368827	4.47501	7.64079e-06	2.92418e-05	up
A01G099300v1	D01G102300v1	14.384	-4.16653	1.13115	-3.68345	0.000230094	0.000698193	down
A08G247400v1	D08G262000v1	9.1177	-5.14278	1.71123	-3.00531	0.00265307	0.00650328	down
A05G012700v1	D05G012900v1	132.421	-1.58141	0.27168	-5.82085	5.85486e-09	3.31382e-08	down
A01G035500v1	D01G037900v1	17.8086	3.75556	0.956503	3.92634	8.6247e-05	0.000282715	up
A12G100200v1	D12G106100v1	150.399	1.45264	0.268289	5.41445	6.1479e-08	3.07704e-07	up
A12G070900v1	D12G072500v1	139.155	1.52931	0.262797	5.81938	5.90676e-09	3.34233e-08	up
A05G311300v1	D05G317700v1	340.977	-3.47474	0.205461	-16.9119	3.6746e-64	2.20345e-62	down
A03G050200v1	D03G165800v1	30.0475	-1.69638	0.617338	-2.74789	0.00599804	0.0135914	down
A05G343200v1	D05G349700v1	2613.23	1.3296	0.0638152	20.8352	2.07819e-96	2.43237e-94	up
A09G071600v1	D09G071100v1	38.4074	-1.49847	0.503032	-2.97888	0.002893	0.0070292	down
A06G202100v1	D06G213600v1	984.225	1.01297	0.101567	9.97339	1.99307e-23	3.16563e-22	up
A12G016600v1	D12G019300v1	146.641	-2.77014	0.582788	-4.75326	2.00164e-06	8.28319e-06	down
A05G365500v1	D04G080200v1	15.8196	2.11377	0.80918	2.61224	0.00899512	0.0195217	up
A03G073500v1	D03G143400v1	73.3023	-3.23315	0.425258	-7.6028	2.89787e-14	2.65936e-13	down
A05G322000v1	D05G327300v1	9.28476	6.67549	1.7196	3.88199	0.000103604	0.000333859	up
A13G268200v1	D13G282100v1	51.9596	-2.45703	0.496675	-4.94697	7.5378e-07	3.30687e-06	down
A03G040900v1	D03G175400v1	107.967	-3.40129	0.377188	-9.0175	1.92434e-19	2.47317e-18	down
A11G353400v1	D11G371000v1	5.26053	5.85612	1.91115	3.06419	0.00218261	0.00546014	up
A10G293400v1	D10G305800v1	193.391	-1.22504	0.231894	-5.28276	1.27255e-07	6.1335e-07	down
A03G117700v1	D02G138300v1	160.069	-1.03145	0.242211	-4.25849	2.05808e-05	7.38567e-05	down
A02G211300v1	D03G002200v1	170.145	1.2252	0.255008	4.80456	1.55091e-06	6.52409e-06	up
A12G248600v1	D12G258500v1	5.50396	4.41577	1.86894	2.36272	0.0181416	0.0363612	up
A09G281300v1	D09G279500v1	13.2736	-7.16541	1.6522	-4.33689	1.44512e-05	5.31943e-05	down
A01G109900v1	D01G113500v1	260.756	-1.90965	0.197241	-9.68181	3.60297e-22	5.37915e-21	down
A12G226700v1	D12G236100v1	139.686	1.27682	0.279525	4.56781	4.92846e-06	1.93905e-05	up
A12G100000v1	D12G107700v1	4.92565	-5.73493	1.93666	-2.96124	0.00306401	0.00741262	down
A13G090000v1	D13G100000v1	30.0693	-8.34471	1.53413	-5.43936	5.34723e-08	2.69417e-07	down
A02G140000v1	D03G066200v1	116.054	1.12401	0.293349	3.83165	0.000127286	0.000403347	up
A08G215000v1	D08G232300v1	64.2747	-1.02275	0.407651	-2.50888	0.0121115	0.0254448	down
A01G026100v1	D01G026700v1	3219.22	-1.91884	0.0696995	-27.5302	7.6294e-167	2.31923e-164	down
A12G059600v1	D12G061300v1	590.186	-1.82219	0.13738	-13.2638	3.75402e-40	1.17377e-38	down
A05G427700v1	D04G040900v1	59.0937	3.04112	0.476547	6.38157	1.75277e-10	1.14687e-09	up
A04G153200v1	D04G189000v1	102.923	-1.58795	0.324847	-4.88831	1.01703e-06	4.39107e-06	down
A03G030400v1	D03G186600v1	82.3921	-1.21035	0.339269	-3.56751	0.000360391	0.00105636	down
A03G097200v1	D03G132200v1	970.481	-13.3567	1.44568	-9.23903	2.48741e-20	3.38569e-19	down
A08G137900v1	D08G155100v1	132.837	-4.27501	0.380054	-11.2484	2.3579e-29	4.96703e-28	down
A05G417600v1	D04G050500v1	238.806	1.26369	0.205294	6.1555	7.48418e-10	4.63384e-09	up
A08G053900v1	D08G058700v1	6.9443	-6.22927	1.81322	-3.43547	0.000591519	0.0016643	down
A05G274900v1	D05G282500v1	275.36	-1.32187	0.188444	-7.01467	2.30487e-12	1.81398e-11	down
A08G004600v1	D08G004300v1	122.188	-1.07135	0.294552	-3.63721	0.000275608	0.000825768	down
A12G259700v1	D12G269700v1	43.0056	6.42924	1.10789	5.80314	6.50857e-09	3.66736e-08	up
A08G216700v1	D08G233900v1	84.0879	1.03407	0.347033	2.97974	0.00288495	0.00701199	up
A05G284600v1	D05G292100v1	30.2611	1.38303	0.558837	2.47484	0.0133294	0.0276926	up
A11G233700v1	D11G244900v1	55.3615	-1.7305	0.426886	-4.05377	5.03985e-05	0.000171334	down
A08G250500v1	D08G265900v1	34.2994	2.04553	0.568274	3.59954	0.000318775	0.000943607	up
A04G168100v1	D04G204500v1	301.786	-6.75541	0.465697	-14.506	1.10998e-47	4.28469e-46	down
A13G011300v1	D13G014800v1	8.8491	-6.58045	1.74312	-3.77509	0.000159948	0.00049833	down
A01G127900v1	D01G134300v1	162.06	-1.91579	0.250675	-7.64251	2.13028e-14	1.97398e-13	down
A06G091400v1	D06G091600v1	336.382	1.78252	0.180601	9.86993	5.62064e-23	8.70622e-22	up
A02G125800v1	D03G087000v1	7.92329	-2.77445	1.21925	-2.27554	0.0228737	0.0445883	down
A11G196000v1	D11G200100v1	3.71559	-5.32723	2.07455	-2.5679	0.0102318	0.0218909	down
A08G202800v1	D08G221100v1	426.346	6.0309	0.314669	19.1658	7.14035e-82	6.27634e-80	up
A11G103000v1	D11G103700v1	56.3662	-1.42005	0.412544	-3.44217	0.000577057	0.00162779	down
A01G068800v1	D01G069900v1	173.208	2.07615	0.282351	7.3531	1.93659e-13	1.66744e-12	up
A07G241500v1	D07G250700v1	87.4092	-4.19571	0.453901	-9.24365	2.38226e-20	3.2466e-19	down
A08G139200v1	D08G156700v1	234.61	-1.50939	0.21714	-6.95121	3.62176e-12	2.79118e-11	down
A04G115100v1	D04G149700v1	223.764	1.38834	0.224747	6.17732	6.51982e-10	4.05396e-09	up
A08G132800v1	D08G134300v1	3.70136	-5.32234	2.07182	-2.56892	0.0102015	0.0218474	down
A10G108400v1	D10G110900v1	3.24841	5.16106	2.16185	2.38733	0.0169711	0.0342916	up
A03G176500v1	D02G206600v1	16.8675	6.07096	1.5917	3.81414	0.000136657	0.00043067	up
A08G148100v1	D08G166300v1	45.759	2.60666	0.540528	4.82244	1.41813e-06	6.00127e-06	up
A11G394900v1	D11G408500v1	4.72491	-5.67332	1.98012	-2.86514	0.00416826	0.0098087	down
A08G177300v1	D08G198300v1	336.126	1.89962	0.179744	10.5685	4.17259e-26	7.47956e-25	up
A06G210600v1	D06G223200v1	104.249	1.38819	0.320835	4.32681	1.51285e-05	5.54634e-05	up
A11G362900v1	D11G374900v1	184.486	4.06808	0.304974	13.3391	1.37133e-40	4.33732e-39	up
A01G200700v1	D01G213800v1	523.082	-3.16454	0.164549	-19.2316	2.01195e-82	1.79737e-80	down
A05G243100v1	D05G252800v1	469.666	-1.01857	0.147534	-6.90397	5.05688e-12	3.84974e-11	down
A05G448500v1	D04G018100v1	985.672	1.42335	0.102425	13.8966	6.6468e-44	2.28023e-42	up
A02G197800v1	D03G015700v1	157.705	-1.50733	0.253015	-5.95748	2.56154e-09	1.5047e-08	down
A11G361500v1	D11G362100v1	58.6445	-1.73422	0.421527	-4.11413	3.88637e-05	0.000134335	down
A01G178500v1	D01G199900v1	326.185	-5.92656	0.353681	-16.7568	5.05052e-63	2.92436e-61	down
A03G109300v1	D02G129400v1	285.469	1.07044	0.181178	5.9082	3.45859e-09	2.00684e-08	up
A08G084400v1	D08G089100v1	22.7021	-7.93905	1.56011	-5.08877	3.60387e-07	1.64432e-06	down
A03G160400v1	D02G192200v1	318.215	-1.29518	0.182728	-7.08803	1.36038e-12	1.09465e-11	down
A09G215800v1	D09G216200v1	10.5876	2.61817	1.04604	2.50293	0.0123169	0.0258268	up
A09G118200v1	D09G119800v1	605.304	1.34569	0.12712	10.586	3.46197e-26	6.25183e-25	up
A03G152800v1	D01G187100v1	133.08	-8.04168	1.04895	-7.66642	1.7687e-14	1.648e-13	down
A08G179000v1	D08G199900v1	106.179	1.47059	0.301833	4.87218	1.10375e-06	4.74519e-06	up
A05G023900v1	D05G024800v1	6.00177	3.47998	1.5164	2.2949	0.0217388	0.0426686	up
A12G073300v1	D12G074800v1	230.406	-1.63126	0.217851	-7.48797	6.99475e-14	6.23601e-13	down
A05G002000v1	D05G002400v1	69.4848	-1.64538	0.379128	-4.33991	1.4254e-05	5.25037e-05	down
A07G120600v1	D07G120700v1	231.157	1.45667	0.20898	6.97038	3.16079e-12	2.44973e-11	up
A03G219400v1	D02G249800v1	575.281	-3.87413	0.168904	-22.9369	1.99183e-116	3.13635e-114	down
A06G204800v1	D06G215900v1	10.1213	-5.29223	1.68409	-3.14249	0.00167518	0.00429833	down
A03G197100v1	D02G227400v1	5.17431	-4.28696	1.89411	-2.26331	0.0236166	0.0458038	down
A03G260200v1	D02G290200v1	654.147	-1.18945	0.121614	-9.78054	1.36485e-22	2.08315e-21	down
A07G178600v1	D07G184700v1	7.5463	3.84342	1.45495	2.64161	0.00825136	0.0180778	up
A04G061300v1	D05G392400v1	247.757	-1.20738	0.202667	-5.95747	2.56165e-09	1.5047e-08	down
A01G006100v1	D01G005000v1	105.315	-1.13384	0.298887	-3.79355	0.000148506	0.000465134	down
A10G175200v1	D10G141300v1	123.279	3.13925	0.337746	9.2947	1.47616e-20	2.0269e-19	up
A05G355300v1	D05G370000v1	264.08	-1.41678	0.192067	-7.37647	1.6254e-13	1.41003e-12	down
A05G232500v1	D05G241600v1	709.766	-1.85688	0.121962	-15.2251	2.40949e-52	1.05473e-50	down
A07G065400v1	D07G065900v1	113.632	-10.2623	1.46684	-6.9962	2.62999e-12	2.05875e-11	down
A01G252800v1	D01G266600v1	24.4717	-3.92183	0.826235	-4.74662	2.0684e-06	8.54656e-06	down
A02G178500v1	D03G036500v1	542.426	-1.23418	0.13911	-8.87192	7.18947e-19	8.92547e-18	down
A09G258600v1	D09G259400v1	44.525	1.67011	0.48862	3.41801	0.000630813	0.00176442	up
A08G181900v1	D08G202600v1	594.305	-1.31595	0.130286	-10.1005	5.49507e-24	9.02932e-23	down
A13G003500v1	D13G005900v1	103.216	1.67106	0.316268	5.28367	1.26621e-07	6.10431e-07	up
A10G252100v1	D10G261700v1	507.88	-1.00907	0.138542	-7.28348	3.25324e-13	2.73861e-12	down
A09G122000v1	D01G157400v1	14.7556	-7.31803	1.63073	-4.48758	7.20367e-06	2.76511e-05	down
A04G001800v1	D05G459600v1	40.0635	2.91526	0.55227	5.27868	1.30117e-07	6.26043e-07	up
A05G139800v1	D05G142000v1	105.255	2.15497	0.327226	6.58559	4.53091e-11	3.13823e-10	up
A12G152700v1	D12G160000v1	54.0678	2.20733	0.442505	4.98826	6.09257e-07	2.70154e-06	up
A05G043500v1	D05G045600v1	485.892	-1.41817	0.151631	-9.3528	8.53572e-21	1.18391e-19	down
A03G220600v1	D02G250900v1	3427.9	1.01997	0.0562443	18.1346	1.69846e-73	1.24328e-71	up
A13G091900v1	D13G098000v1	270.975	-1.40218	0.19412	-7.22329	5.0744e-13	4.22294e-12	down
A05G076100v1	D05G077600v1	105.776	1.29345	0.3027	4.27306	1.92811e-05	6.95002e-05	up
A11G174400v1	D11G177300v1	96.7883	1.0084	0.311391	3.23838	0.00120209	0.0031864	up
A08G119200v1	D08G125400v1	345.176	-1.24088	0.166374	-7.4584	8.75794e-14	7.75111e-13	down
A10G210000v1	D10G218100v1	66.0155	-1.91959	0.408224	-4.7023	2.57252e-06	1.04929e-05	down
A07G230500v1	D07G239100v1	17.1294	5.07765	1.23332	4.11706	3.8374e-05	0.000132684	up
A11G071100v1	D11G070800v1	69.6788	1.57258	0.377957	4.16073	3.17233e-05	0.00011088	up
A09G009500v1	D09G009000v1	115.168	1.1517	0.292401	3.93877	8.19006e-05	0.000269355	up
A07G148500v1	D07G151100v1	39.8711	-1.76519	0.507582	-3.47764	0.000505844	0.00144196	down
A12G304600v1	D12G314000v1	1339.95	2.13147	0.0995606	21.4088	1.10714e-101	1.40883e-99	up
A08G034800v1	D08G038600v1	32.8735	-2.5587	0.587669	-4.35398	1.33691e-05	4.9469e-05	down
A10G033900v1	D10G033700v1	61.4632	9.40161	1.48843	6.31645	2.67633e-10	1.72589e-09	up
A07G013400v1	D07G013800v1	78.336	-2.60436	0.390162	-6.67508	2.47098e-11	1.75421e-10	down
A10G192600v1	D10G097700v1	11.8809	-5.53285	1.65315	-3.34685	0.000817349	0.00223868	down
A06G123700v1	D06G127500v1	643.114	-1.44257	0.123518	-11.679	1.63124e-31	3.79415e-30	down
A12G280800v1	D12G290000v1	7.46106	-3.13798	1.3573	-2.31193	0.0207816	0.0410438	down
A01G129800v1	D01G136600v1	11.6123	-6.97165	1.6655	-4.18593	2.84002e-05	9.99349e-05	down
A06G103800v1	D06G105100v1	67.6517	1.65465	0.380451	4.34918	1.36648e-05	5.0478e-05	up
A02G003900v1	D02G000500v1	163.187	5.4285	0.434362	12.4976	7.69014e-36	2.07438e-34	up
A09G145200v1	D09G141700v1	751.385	9.24695	0.653968	14.1398	2.16045e-45	7.73907e-44	up
A05G203400v1	D06G008700v1	90.0725	-2.3488	0.370277	-6.34338	2.24785e-10	1.45687e-09	down
A02G011900v1	D02G010100v1	96.7958	3.53968	0.387707	9.12979	6.8634e-20	9.0712e-19	up
A05G087900v1	D05G088800v1	108.826	7.77786	1.05571	7.36742	1.73968e-13	1.50381e-12	up
A12G112300v1	D12G118000v1	200.045	-1.29902	0.21805	-5.95744	2.56227e-09	1.5047e-08	down
A13G032700v1	D13G036300v1	68.0769	-2.44352	0.403863	-6.05038	1.44506e-09	8.6986e-09	down
A09G051300v1	D09G054900v1	42.2253	-8.83421	1.50656	-5.86382	4.52351e-09	2.59518e-08	down
A05G336700v1	D05G341900v1	11.1259	-4.40759	1.32888	-3.31677	0.000910639	0.00247408	down
A04G095600v1	D04G129600v1	82.6129	3.69067	0.432445	8.53443	1.40846e-17	1.61313e-16	up
A04G004400v1	D05G458000v1	78.8461	1.01167	0.349872	2.89153	0.00383368	0.00909273	up
A03G179000v1	D02G208900v1	15.3492	-4.27126	1.09401	-3.90423	9.45253e-05	0.000307365	down
A10G271200v1	D10G292100v1	128.535	2.30015	0.29709	7.74228	9.76478e-15	9.26405e-14	up
A05G098300v1	D05G098400v1	46.6783	-8.97882	1.50058	-5.98358	2.18291e-09	1.29128e-08	down
A12G297700v1	D12G306700v1	7.29296	4.83143	1.76949	2.73041	0.00632551	0.0142537	up
A11G313900v1	D11G322800v1	66.4937	-1.2895	0.392486	-3.28546	0.00101816	0.00273934	down
A13G261300v1	D13G275500v1	35.9643	-1.518	0.515993	-2.9419	0.00326208	0.00785189	down
A03G029300v1	D03G187300v1	205.385	1.65206	0.223971	7.37623	1.62835e-13	1.41203e-12	up
A03G155300v1	D02G184900v1	50.7905	2.60387	0.482699	5.39438	6.87595e-08	3.41798e-07	up
A06G219900v1	D06G235100v1	1195.43	-1.73937	0.102159	-17.0261	5.25508e-65	3.23084e-63	down
A02G100100v1	D02G130500v1	478.011	-1.03419	0.141409	-7.31346	2.60355e-13	2.22246e-12	down
A05G367900v1	D04G083200v1	50.0689	-7.6309	1.49149	-5.1163	3.11592e-07	1.43123e-06	down
A06G132600v1	D06G138700v1	201.089	1.68528	0.473505	3.55916	0.000372047	0.0010882	up
A11G307300v1	D11G310000v1	31.7521	1.25522	0.542333	2.31449	0.0206411	0.0408105	up
A03G122000v1	D02G140100v1	208.076	-2.55777	0.236429	-10.8184	2.81798e-27	5.32158e-26	down
A07G034300v1	D07G034600v1	9.89838	-2.48059	1.0538	-2.35395	0.018575	0.0371458	down
A02G034700v1	D02G043700v1	35.1675	6.13142	1.12575	5.4465	5.13705e-08	2.59185e-07	up
A08G251700v1	D08G266600v1	503.236	-12.4091	1.44883	-8.5649	1.08169e-17	1.2467e-16	down
A07G011700v1	D07G012200v1	56.9501	1.63284	0.447369	3.64987	0.000262372	0.000789568	up
A12G155900v1	D12G163900v1	7.62204	6.38889	1.8242	3.50229	0.000461282	0.00132477	up
A09G223100v1	D09G184900v1	18.5139	-7.64476	1.58538	-4.82203	1.42102e-06	6.01117e-06	down
A07G043500v1	D07G044200v1	26.9858	1.54615	0.625086	2.4735	0.0133798	0.0277866	up
A01G177800v1	D01G189400v1	666.02	1.3755	0.122827	11.1987	4.13614e-29	8.62169e-28	up
A10G213800v1	D10G220800v1	65.9685	-1.2131	0.387656	-3.12932	0.00175211	0.00447838	down
A06G029700v1	D06G029500v1	80.7324	-1.52142	0.356408	-4.26875	1.96569e-05	7.08083e-05	down
A11G226000v1	D11G255200v1	18.2259	-6.15846	1.58515	-3.88509	0.000102292	0.000330118	down
A10G242400v1	D10G252800v1	59.434	9.35322	1.48955	6.27923	3.40263e-10	2.17728e-09	up
A07G263100v1	D07G273800v1	76.7728	-8.24977	1.47217	-5.60383	2.0967e-08	1.11574e-07	down
A02G076400v1	D02G085300v1	878.173	-3.46489	0.128971	-26.8656	5.54539e-159	1.48015e-156	down
A06G007800v1	D06G007100v1	112.398	1.09018	0.315928	3.45073	0.000559073	0.00158053	up
A08G160100v1	D08G179800v1	340.201	1.34891	0.183536	7.34956	1.98866e-13	1.71025e-12	up
A05G004600v1	D05G004700v1	183.672	1.84535	0.236025	7.81842	5.34886e-15	5.15729e-14	up
A01G179300v1	D01G199000v1	103.128	-1.876	0.323778	-5.79409	6.86925e-09	3.86199e-08	down
A11G258900v1	D10G230400v1	206.515	6.10285	0.461188	13.2329	5.66672e-40	1.75676e-38	up
A08G100700v1	D08G106900v1	7.42788	-4.83729	1.76762	-2.73661	0.00620762	0.0140198	down
A04G145300v1	D04G181200v1	1502.73	-4.1681	0.113022	-36.8787	1.0154e-297	1.01018e-294	down
A05G034800v1	D05G036700v1	9.3929	-6.66557	1.71504	-3.88654	0.000101684	0.000328593	down
A09G075700v1	D09G075700v1	698.238	1.11326	0.124283	8.95748	3.32187e-19	4.20022e-18	up
A12G308400v1	D12G317900v1	60.7008	3.20925	0.485248	6.61362	3.75028e-11	2.6216e-10	up
A13G022400v1	D12G000300v1	24.6597	-1.87127	0.676158	-2.7675	0.00564879	0.0128813	down
A13G084400v1	D13G089100v1	56.3201	-1.80177	0.428385	-4.20596	2.59972e-05	9.19078e-05	down
A10G107800v1	D10G111600v1	143.321	-2.30507	0.275423	-8.3692	5.80084e-17	6.42525e-16	down
A03G239700v1	D02G270100v1	352.764	-1.13253	0.171774	-6.59315	4.30602e-11	2.99003e-10	down
A10G173200v1	D10G143600v1	133.987	1.58063	0.274645	5.75518	8.65482e-09	4.80782e-08	up
A07G161500v1	D07G164600v1	15.5459	-2.55909	0.861236	-2.97142	0.00296425	0.00719194	down
A12G252000v1	D12G261900v1	206.082	-2.38071	0.22998	-10.3518	4.10727e-25	7.12893e-24	down
A05G379700v1	D04G094400v1	101.716	-8.65671	1.46356	-5.91484	3.32204e-09	1.93222e-08	down
A05G267000v1	D05G275900v1	61.3114	1.85459	0.439058	4.22403	2.39973e-05	8.5306e-05	up
A11G363600v1	D11G375600v1	796.489	-1.19485	0.117842	-10.1394	3.69176e-24	6.11669e-23	down
A05G394500v1	D04G072000v1	687.092	1.11124	0.128468	8.64993	5.15315e-18	6.08344e-17	up
A02G206700v1	D03G006800v1	301.14	1.10228	0.184844	5.96328	2.4723e-09	1.45539e-08	up
A07G169100v1	D07G174200v1	128.026	8.01302	1.05056	7.62735	2.39635e-14	2.21397e-13	up
A05G243800v1	D05G253500v1	26.4317	5.11147	1.00185	5.10202	3.36039e-07	1.53836e-06	up
A09G268800v1	D09G270100v1	94.4356	1.82815	0.324444	5.63472	1.75339e-08	9.4037e-08	up
A12G115900v1	D12G120700v1	130.725	-1.14061	0.271652	-4.1988	2.68336e-05	9.47117e-05	down
A07G054100v1	D07G055400v1	1309.35	-2.62089	0.0959052	-27.3279	1.97818e-164	5.85088e-162	down
A01G121100v1	D01G127700v1	40.6749	-1.2947	0.495531	-2.61275	0.00898169	0.0195021	down
A04G035300v1	D05G429900v1	49.4344	-9.06145	1.49795	-6.04924	1.45526e-09	8.75759e-09	down
A01G151600v1	D01G159700v1	732.848	-1.00745	0.117156	-8.59924	8.02448e-18	9.37203e-17	down
A11G292400v1	D11G298400v1	295.022	2.15638	0.190769	11.3036	1.25878e-29	2.69577e-28	up
A07G064400v1	D07G065000v1	373.464	-3.87012	0.209949	-18.4336	7.06033e-76	5.3843e-74	down
A11G269200v1	D11G276000v1	1594.59	1.56194	0.0816559	19.1283	1.46892e-81	1.2758e-79	up
A07G200100v1	D07G209400v1	1008.68	-1.32929	0.104301	-12.7447	3.33609e-37	9.3973e-36	down
A03G201400v1	D02G230800v1	156.615	-2.62285	0.270992	-9.67869	3.71449e-22	5.53809e-21	down
A10G098400v1	D10G122800v1	18.8414	-3.52146	0.872356	-4.03673	5.42016e-05	0.000183242	down
A05G002600v1	D05G003100v1	5.19755	-5.81161	1.91262	-3.03855	0.00237719	0.00590173	down
A05G088700v1	D05G089500v1	52.4723	-1.47404	0.45425	-3.24499	0.00117456	0.00311986	down
A13G191700v1	D13G202600v1	3721.59	1.26725	0.0566381	22.3745	6.9682e-111	1.03049e-108	up
A11G185600v1	D11G189200v1	119.714	-1.34075	0.290303	-4.61845	3.8661e-06	1.54298e-05	down
A05G033100v1	D05G035100v1	26.8915	-3.27995	0.71007	-4.6192	3.85231e-06	1.53804e-05	down
A09G073900v1	D09G074100v1	2617.83	-1.13871	0.0638468	-17.8351	3.77649e-71	2.624e-69	down
A08G065800v1	D08G071700v1	48.5972	1.59184	0.445917	3.56981	0.000357242	0.00104755	up
A13G222300v1	D13G234600v1	74.6163	-1.74868	0.365686	-4.78191	1.73634e-06	7.24977e-06	down
A05G065200v1	D05G067100v1	459.704	-1.97919	0.150348	-13.1641	1.41233e-39	4.29329e-38	down
A01G211000v1	D01G225700v1	77.9347	-3.33088	0.415675	-8.01317	1.11786e-15	1.13062e-14	down
A11G019900v1	D11G019900v1	54.2964	2.90593	0.509298	5.70574	1.15835e-08	6.35889e-08	up
A05G289400v1	D05G296700v1	266.371	1.05363	0.19026	5.53783	3.06239e-08	1.5908e-07	up
A08G076900v1	D08G081300v1	292.581	1.90984	0.201843	9.46202	3.02049e-21	4.28726e-20	up
A12G221600v1	D12G229500v1	93.8578	2.69132	0.352883	7.62667	2.40893e-14	2.22372e-13	up
A05G171700v1	D05G177900v1	201.43	1.45606	0.219346	6.6382	3.17543e-11	2.23403e-10	up
A12G189800v1	D12G195900v1	86.1759	-1.85859	0.350866	-5.29716	1.17618e-07	5.69035e-07	down
A06G113800v1	D06G117000v1	178.717	1.10332	0.243558	4.53	5.89839e-06	2.2963e-05	up
A09G285800v1	D06G051400v1	47.8218	9.03969	1.49975	6.02747	1.66549e-09	9.94343e-09	up
A01G059300v1	D01G060500v1	6.17841	-6.06126	1.84281	-3.28915	0.0010049	0.00270566	down
A12G177400v1	D12G183100v1	145.124	1.88938	0.266649	7.08562	1.38419e-12	1.11258e-11	up
A11G117100v1	D11G117900v1	215.16	1.36327	0.211864	6.43467	1.23739e-10	8.19696e-10	up
A10G252600v1	D10G262400v1	312.912	-2.42831	0.189631	-12.8054	1.52865e-37	4.36215e-36	down
A01G029000v1	D01G029700v1	211.28	3.75525	0.268915	13.9645	2.56763e-44	8.90614e-43	up
A09G003600v1	D09G002800v1	374.575	-1.99732	0.174129	-11.4703	1.85965e-30	4.1322e-29	down
A13G152800v1	D11G149900v1	343.467	11.8844	1.45108	8.19003	2.61163e-16	2.76139e-15	up
A03G250700v1	D04G140300v1	58.7348	9.33599	1.49192	6.25771	3.90667e-10	2.48418e-09	up
A04G083200v1	D04G109500v1	49.7658	-1.93968	0.45499	-4.26312	2.0159e-05	7.24498e-05	down
A11G186800v1	D11G190300v1	270.697	5.98812	0.389659	15.3676	2.70116e-53	1.21647e-51	up
A08G078500v1	D08G082900v1	128.775	2.38387	0.299534	7.95861	1.73988e-15	1.73015e-14	up
A09G012700v1	D09G012400v1	1636.33	-1.23862	0.0819352	-15.1171	1.24958e-51	5.38376e-50	down
A11G136800v1	D11G137100v1	12.7855	3.23209	1.01868	3.17282	0.00150964	0.00391024	up
A08G140100v1	D08G158100v1	196.565	-11.053	1.45672	-7.5876	3.25874e-14	2.97556e-13	down
A03G231100v1	D02G261200v1	46.8414	-1.65903	0.485543	-3.41686	0.000633471	0.00177072	down
A11G072100v1	D11G071500v1	37.9267	2.04378	0.534049	3.82695	0.000129739	0.000410642	up
A08G007500v1	D08G007300v1	32.8846	8.4999	1.52566	5.57128	2.52869e-08	1.32978e-07	up
A11G348800v1	D11G366700v1	121.077	10.3802	1.46579	7.08164	1.4246e-12	1.14406e-11	up
A08G064100v1	D08G070100v1	51.5282	-1.87253	0.441426	-4.242	2.21533e-05	7.91364e-05	down
A11G082200v1	D11G081100v1	119.714	1.66763	0.286229	5.82622	5.66966e-09	3.21482e-08	up
A06G115300v1	D06G118600v1	16.062	-5.97578	1.59785	-3.73989	0.000184098	0.000568316	down
A07G036600v1	D07G036900v1	522.678	1.2096	0.135259	8.94286	3.79241e-19	4.78136e-18	up
A11G212200v1	D11G215900v1	136.044	-9.07636	1.45838	-6.22357	4.85976e-10	3.06529e-09	down
A09G285300v1	D09G283600v1	965.071	1.51262	0.103184	14.6594	1.17242e-48	4.69977e-47	up
A09G098500v1	D09G100800v1	701.979	-2.03438	0.124945	-16.2822	1.32128e-59	6.86909e-58	down
A02G105100v1	D02G120000v1	498.216	1.05887	0.139651	7.58227	3.39566e-14	3.09155e-13	up
A09G034100v1	D04G229900v1	59.352	-3.69033	0.506306	-7.28873	3.12888e-13	2.64408e-12	down
A09G260300v1	D09G261200v1	218.06	1.31832	0.212808	6.19488	5.83287e-10	3.64755e-09	up
A04G170700v1	D04G207500v1	38.6672	1.89589	0.549671	3.44913	0.000562397	0.00158904	up
A07G045700v1	D07G046500v1	19.7516	2.98671	0.811455	3.68068	0.000232614	0.00070535	up
A13G139100v1	D13G146200v1	568.158	-1.18103	0.131717	-8.96643	3.06289e-19	3.88172e-18	down
A09G166200v1	D09G164800v1	467.451	1.74433	0.147657	11.8134	3.32642e-32	7.93952e-31	up
A09G146000v1	D09G142400v1	148.24	-1.25226	0.262201	-4.77597	1.78845e-06	7.45598e-06	down
A10G120200v1	D10G200700v1	298.025	-2.88891	0.203503	-14.1959	9.71052e-46	3.51296e-44	down
A07G212300v1	D07G221700v1	67.623	-3.00182	0.467376	-6.4227	1.33879e-10	8.84457e-10	down
A06G010100v1	D06G009400v1	8.20228	-4.9784	1.75339	-2.8393	0.00452131	0.0105342	down
A11G243900v1	D11G235100v1	53.4523	1.16114	0.422396	2.74893	0.00597897	0.0135566	up
A13G085600v1	D13G090200v1	6.02731	3.48572	1.50631	2.31408	0.0206631	0.0408466	up
A13G002500v1	D13G005000v1	4.43878	-5.58456	1.98071	-2.81948	0.00481018	0.0111337	down
A04G044800v1	D05G408200v1	45.8363	1.59882	0.462481	3.45706	0.000546113	0.00154749	up
A12G042900v1	D12G034600v1	37.2542	2.80023	0.582959	4.80348	1.55933e-06	6.5557e-06	up
A07G252900v1	D07G263300v1	20.3321	2.70532	0.786938	3.43779	0.000586489	0.00165206	up
A07G163300v1	D07G166900v1	53.68	-1.03563	0.414737	-2.49707	0.0125223	0.0262055	down
A05G352600v1	D05G374600v1	208.414	-6.85461	1.80449	-3.79863	0.000145496	0.000456883	down
A05G099000v1	D05G099100v1	165.529	-7.77155	0.862635	-9.00909	2.07774e-19	2.66405e-18	down
A09G261900v1	D09G262800v1	95.2835	-1.80577	0.344896	-5.2357	1.64361e-07	7.81868e-07	down
A02G144900v1	D03G071900v1	1068.46	-1.05906	0.098031	-10.8033	3.32142e-27	6.25073e-26	down
A10G118400v1	D10G101100v1	80.2861	2.52964	0.372077	6.79872	1.05556e-11	7.76052e-11	up
A12G307500v1	D12G317000v1	164.413	1.39173	0.253366	5.49297	3.95231e-08	2.02302e-07	up
A07G025300v1	D07G025700v1	240.877	2.28589	0.210612	10.8536	1.91786e-27	3.65329e-26	up
A05G224700v1	D05G233400v1	11.2977	4.4571	1.32386	3.36675	0.000760591	0.00209397	up
A11G324600v1	D11G333100v1	15.8258	3.02575	0.880268	3.43731	0.000587516	0.00165431	up
A05G203700v1	D05G211000v1	236.429	9.90163	1.44951	6.83102	8.43107e-12	6.25952e-11	up
A08G296900v1	D08G313200v1	260.863	-1.47987	0.194878	-7.59384	3.10568e-14	2.84173e-13	down
A01G185300v1	D01G192800v1	1390.86	-1.5373	0.0871367	-17.6424	1.16407e-69	7.8394e-68	down
A01G192000v1	D01G204000v1	142.971	-1.23264	0.26371	-4.67421	2.95081e-06	1.19645e-05	down
A13G177600v1	D13G189400v1	182.171	-1.39147	0.229165	-6.07189	1.26413e-09	7.66005e-09	down
A05G233800v1	D05G243000v1	383.964	-1.08009	0.159419	-6.77516	1.24266e-11	9.07509e-11	down
A07G034800v1	D07G035300v1	411.322	-1.73396	0.156879	-11.0528	2.12372e-28	4.2683e-27	down
A09G218800v1	D09G219200v1	67.15	2.42103	0.465977	5.19561	2.04047e-07	9.60221e-07	up
A05G114100v1	D05G114600v1	28.1022	1.4728	0.614357	2.3973	0.0165162	0.0335054	up
A02G087800v1	D02G098800v1	31.2587	-1.34352	0.58081	-2.31319	0.0207124	0.0409218	down
A09G186900v1	D09G185600v1	220.659	-1.086	0.209593	-5.18148	2.20132e-07	1.03016e-06	down
A07G254600v1	D07G264900v1	31.2936	-8.40233	1.53138	-5.48678	4.09336e-08	2.09033e-07	down
A02G068600v1	D02G076400v1	279.897	-5.22306	0.319017	-16.3724	3.01295e-60	1.60449e-58	down
A08G208300v1	D08G226400v1	542.904	-1.28023	0.134621	-9.50989	1.90872e-21	2.73404e-20	down
A04G090000v1	D04G121800v1	46.4779	-3.50465	0.556468	-6.29802	3.01466e-10	1.93666e-09	down
A05G152800v1	D05G156200v1	148.567	1.87047	0.274285	6.81942	9.14093e-12	6.76589e-11	up
A05G058100v1	D05G059800v1	176.506	-1.73951	0.242404	-7.17607	7.17418e-13	5.88535e-12	down
A04G098200v1	D04G131400v1	11.3565	6.96509	1.67639	4.15481	3.25565e-05	0.000113574	up
A05G327400v1	D05G331400v1	61.8897	-3.01702	0.454821	-6.63343	3.27977e-11	2.30521e-10	down
A12G053100v1	D12G055400v1	174.842	1.91738	0.250089	7.6668	1.76334e-14	1.64371e-13	up
A05G014300v1	D05G015000v1	347.993	-1.00711	0.16439	-6.12639	8.9895e-10	5.52212e-09	down
A05G044900v1	D05G047000v1	93.8224	-1.07843	0.3155	-3.41817	0.000630433	0.00176358	down
A10G172500v1	D10G144300v1	231.405	-1.3548	0.214043	-6.3296	2.45798e-10	1.58883e-09	down
A01G255800v1	D01G269600v1	38.6774	1.13781	0.495892	2.29447	0.0217636	0.0427095	up
A01G202300v1	D01G215200v1	153.067	1.30109	0.264235	4.92398	8.48004e-07	3.70095e-06	up
A10G025700v1	D10G025500v1	105.214	-2.55136	0.326187	-7.82178	5.20829e-15	5.02396e-14	down
A12G263300v1	D12G272200v1	292.889	1.82613	0.187604	9.73398	2.15972e-22	3.27127e-21	up
A05G278900v1	D05G286200v1	84.2083	-2.11461	0.365766	-5.7813	7.41247e-09	4.1514e-08	down
A03G103000v1	D02G111100v1	40.258	-1.30884	0.485395	-2.69644	0.00700859	0.0156448	down
A02G196600v1	D03G017100v1	11.4093	-3.02728	1.11894	-2.70548	0.00682056	0.0152624	down
A04G043400v1	D05G410900v1	52.2989	1.37838	0.448045	3.07644	0.00209488	0.0052557	up
A06G051700v1	D06G053700v1	163.001	1.37527	0.254047	5.41344	6.18242e-08	3.09291e-07	up
A08G254700v1	D08G269600v1	86.013	-1.73718	0.339467	-5.11738	3.09809e-07	1.42376e-06	down
A04G117100v1	D06G031300v1	3.71559	-5.32723	2.07455	-2.5679	0.0102318	0.0218909	down
A09G070900v1	D04G110600v1	5.3201	5.87049	1.92477	3.04998	0.00228859	0.0057005	up
A02G023300v1	D02G024300v1	105.291	-7.70379	1.05752	-7.28479	3.22176e-13	2.71523e-12	down
A08G112500v1	D08G118800v1	364.879	-4.90128	0.25832	-18.9737	2.81651e-80	2.38011e-78	down
A05G170800v1	D05G177000v1	472.47	1.34111	0.152952	8.76818	1.81581e-18	2.20425e-17	up
A03G202100v1	D02G231500v1	14.8027	-4.22709	1.12031	-3.77313	0.000161211	0.000502124	down
A08G171100v1	D08G191200v1	1127.1	-1.39129	0.1012	-13.7479	5.24336e-43	1.75745e-41	down
A08G057700v1	D08G062800v1	36.2006	-1.53083	0.515662	-2.96866	0.00299102	0.00724885	down
A01G020800v1	D01G019200v1	377.355	-8.54735	0.735982	-11.6135	3.51755e-31	8.05321e-30	down
A09G095000v1	D09G097200v1	17.3873	-4.02027	1.00399	-4.00428	6.22057e-05	0.000208339	down
A05G304300v1	D05G311300v1	120.408	2.28614	0.300651	7.60398	2.87167e-14	2.63642e-13	up
A12G193100v1	D12G200900v1	142.875	-2.14238	0.271759	-7.88337	3.18661e-15	3.11642e-14	down
A10G150200v1	D10G165100v1	217.267	1.33016	0.217113	6.12657	8.97917e-10	5.51733e-09	up
A13G133600v1	D13G138900v1	136.417	1.36243	0.276801	4.92207	8.5633e-07	3.73133e-06	up
A12G202400v1	D12G210500v1	281.578	1.71826	0.19087	9.00224	2.2116e-19	2.82906e-18	up
A10G123700v1	D10G197100v1	329.901	-9.35582	1.03272	-9.05938	1.312e-19	1.70016e-18	down
A08G019000v1	D08G019200v1	500.299	-1.11409	0.14451	-7.70943	1.26376e-14	1.19121e-13	down
A05G216400v1	D05G224500v1	96.832	-2.40957	0.335231	-7.18779	6.58497e-13	5.42028e-12	down
A11G315200v1	D11G324200v1	113.961	1.87409	0.299091	6.26595	3.70556e-10	2.36179e-09	up
A09G262500v1	D09G263500v1	110.596	4.02162	0.391322	10.277	8.94644e-25	1.53097e-23	up
A08G233600v1	D08G248800v1	186.172	8.55473	1.04372	8.19636	2.47771e-16	2.63379e-15	up
A13G056900v1	D13G082900v1	438.767	2.47501	0.161958	15.2818	1.01171e-52	4.48245e-51	up
A01G254100v1	D01G268000v1	103.715	1.12039	0.325892	3.43793	0.000586179	0.0016514	up
A05G105400v1	D05G105700v1	32.9333	-2.08139	0.563407	-3.6943	0.000220495	0.000671394	down
A12G118800v1	D12G123700v1	368.693	-1.02955	0.165982	-6.20279	5.54708e-10	3.48076e-09	down
A06G074200v1	D06G074500v1	56.0519	1.51158	0.415342	3.63936	0.000273319	0.000819469	up
A05G135700v1	D05G137700v1	1870.77	-2.16175	0.0781005	-27.6791	1.24737e-168	3.90017e-166	down
A13G087900v1	D13G092500v1	347.431	1.15001	0.174202	6.60157	4.06823e-11	2.83481e-10	up
A11G211400v1	D11G215000v1	288.114	1.29028	0.200583	6.43265	1.25401e-10	8.2995e-10	up
A02G036100v1	D02G045100v1	171.832	1.50942	0.23837	6.33228	2.41564e-10	1.56192e-09	up
A06G083900v1	D06G084100v1	72.7721	-1.12328	0.357441	-3.14257	0.00167471	0.00429762	down
A09G004200v1	D09G003500v1	105.867	-1.06767	0.297647	-3.58705	0.000334443	0.000985321	down
A10G212400v1	D10G222200v1	347.354	-1.26644	0.168849	-7.5004	6.36234e-14	5.6954e-13	down
A08G160200v1	D08G180000v1	8.77495	2.9909	1.22959	2.43244	0.0149975	0.0307177	up
A05G026500v1	D05G028500v1	92.9635	2.43038	0.34797	6.98446	2.85957e-12	2.22889e-11	up
A11G126800v1	D11G128200v1	24.7536	-3.31394	0.734366	-4.51265	6.40226e-06	2.47485e-05	down
A03G222000v1	D02G252300v1	11.0326	6.92446	1.68019	4.12123	3.76852e-05	0.000130344	up
A11G063200v1	D11G062600v1	483.825	1.13403	0.141341	8.02338	1.02873e-15	1.04239e-14	up
A03G077200v1	D03G139800v1	4.28851	5.56019	2.00106	2.77862	0.00545896	0.0124888	up
A05G006100v1	D05G006100v1	3475.23	-1.71735	0.0575772	-29.8269	1.74891e-195	6.83544e-193	down
A11G094900v1	D11G094600v1	380.536	-1.26857	0.158322	-8.01257	1.12337e-15	1.13567e-14	down
A13G264400v1	D13G278500v1	143.425	2.52154	0.290389	8.6833	3.84443e-18	4.5705e-17	up
A08G290600v1	D08G305900v1	14.567	5.85913	1.61422	3.6297	0.000283748	0.000848646	up
A03G097900v1	D03G117400v1	7.88961	-3.23824	1.29572	-2.49918	0.0124481	0.0260669	down
A13G244100v1	D13G256100v1	8.57789	4.03931	1.42263	2.83933	0.00452084	0.0105342	up
A05G371400v1	D04G086200v1	721.756	1.58434	0.123935	12.7836	2.02381e-37	5.7377e-36	up
A07G007000v1	D07G005600v1	7.30669	6.32914	1.78797	3.53985	0.000400357	0.00116431	up
A09G251300v1	D09G252300v1	4076.16	-1.41512	0.0560867	-25.2309	1.8374e-140	4.10359e-138	down
A10G297200v1	D10G310600v1	867.667	1.12759	0.105677	10.6701	1.40409e-26	2.57812e-25	up
A13G106300v1	D02G143100v1	6.97988	-6.23599	1.85981	-3.35303	0.00079933	0.00219317	down
A02G171400v1	D03G061400v1	61.8641	-2.12463	0.418018	-5.08264	3.72224e-07	1.69479e-06	down
A01G133900v1	D01G140700v1	20.939	5.37069	1.19579	4.49134	7.07752e-06	2.72194e-05	up
A11G330400v1	D11G345000v1	188.901	1.57576	0.232067	6.79011	1.12048e-11	8.22398e-11	up
A04G022200v1	D05G442900v1	61.3727	-2.62718	0.42994	-6.11057	9.92731e-10	6.07774e-09	down
A01G107000v1	D01G109900v1	66.5016	1.96646	0.404762	4.85831	1.18392e-06	5.06995e-06	up
A09G189100v1	D09G187900v1	131.184	-3.02621	0.319692	-9.46603	2.90689e-21	4.13675e-20	down
A12G105900v1	D12G112500v1	180.398	-2.56406	0.268357	-9.55465	1.24002e-21	1.78437e-20	down
A05G125500v1	D05G126500v1	103.534	1.05703	0.299791	3.52589	0.000422066	0.00122096	up
A12G136400v1	D12G144500v1	9.85842	-6.73585	1.70483	-3.95104	7.78108e-05	0.000256599	down
A06G094500v1	D06G095300v1	60.7826	1.763	0.40624	4.33978	1.42622e-05	5.25252e-05	up
A01G050800v1	D01G053900v1	6.76961	6.21984	1.81455	3.42777	0.000608564	0.00170721	up
A09G198200v1	D09G197500v1	450.336	-1.27317	0.148887	-8.55122	1.21789e-17	1.40074e-16	down
A11G189000v1	D11G192600v1	37.1072	-3.03959	0.577929	-5.25945	1.44486e-07	6.91833e-07	down
[truncated: 3,995 more rows]
