# Supplementary material for: Histone Maps in Gossypium darwinii Reveal Epigenetic Regulation Drives Subgenome Divergence and Cotton Domestication
Source: Int J Mol Sci. 2023 Jun 25;24(13):10607. doi: 10.3390/ijms241310607 (PMC10341804; doi:10.3390/ijms241310607)
Supplement: Supplementary file 1 [file ijms-24-10607-s001.zip › Supplementary Table 5.xlsx]

## Sheet: Sheet1
Supplemental Table 5. CS transitions of genes from Gd to Gh.
Gene	CS in Gd	CS in Gh
A01G001500v1	S4	S6
A01G001700v1	S4	S3
A01G002000v1	S2	S3
A01G003400v1	S3	S4
A01G004200v1	S3	S2
A01G004600v1	S3	S2
A01G005100v1	S3	S4
A01G005700v1	S1	S3
A01G006700v1	S3	S2
A01G007600v1	S1	S2
A01G008900v1	S1	S2
A01G009000v1	S1	S3
A01G009300v1	S6	S3
A01G009600v1	S3	S1
A01G010100v1	S3	S2
A01G010900v1	S3	S2
A01G011800v1	S3	S1
A01G011900v1	S3	S2
A01G012800v1	S3	S1
A01G013200v1	S4	S3
A01G013300v1	S4	S3
A01G013800v1	S3	S4
A01G014100v1	S2	S1
A01G014500v1	S1	S2
A01G014600v1	S1	S2
A01G014700v1	S1	S2
A01G014800v1	S1	S2
A01G014900v1	S3	S2
A01G015200v1	S1	S3
A01G015300v1	S1	S2
A01G015400v1	S1	S2
A01G016000v1	S1	S2
A01G016400v1	S2	S1
A01G018500v1	S5	S4
A01G018700v1	S3	S1
A01G020900v1	S3	S4
A01G021400v1	S1	S2
A01G022000v1	S3	S2
A01G022100v1	S3	S2
A01G022800v1	S1	S3
A01G023000v1	S3	S1
A01G023500v1	S1	S3
A01G023800v1	S3	S2
A01G024100v1	S2	S3
A01G024500v1	S3	S4
A01G025000v1	S1	S2
A01G026400v1	S1	S3
A01G027400v1	S1	S3
A01G027700v1	S2	S3
A01G027800v1	S2	S3
A01G028000v1	S3	S2
A01G028300v1	S1	S2
A01G028700v1	S1	S3
A01G029400v1	S4	S6
A01G029500v1	S3	S5
A01G029600v1	S4	S3
A01G030700v1	S4	S3
A01G031100v1	S2	S3
A01G031300v1	S2	S3
A01G032800v1	S3	S4
A01G033200v1	S2	S3
A01G034100v1	S2	S3
A01G034400v1	S4	S3
A01G034900v1	S2	S4
A01G035000v1	S3	S2
A01G035300v1	S1	S3
A01G036000v1	S3	S2
A01G036300v1	S1	S3
A01G036600v1	S2	S5
A01G036800v1	S2	S3
A01G037400v1	S3	S2
A01G037600v1	S3	S4
A01G038500v1	S1	S2
A01G039000v1	S2	S3
A01G039100v1	S3	S2
A01G039200v1	S1	S2
A01G039500v1	S1	S4
A01G039600v1	S3	S4
A01G040000v1	S4	S3
A01G040600v1	S1	S3
A01G040800v1	S2	S4
A01G042600v1	S1	S2
A01G042900v1	S2	S3
A01G043000v1	S1	S2
A01G043100v1	S3	S2
A01G043200v1	S1	S2
A01G043400v1	S1	S2
A01G043500v1	S1	S2
A01G043600v1	S1	S2
A01G043700v1	S3	S2
A01G043800v1	S1	S2
A01G044600v1	S4	S3
A01G045100v1	S1	S3
A01G045500v1	S3	S2
A01G046200v1	S1	S2
A01G046800v1	S6	S3
A01G047000v1	S5	S4
A01G047200v1	S6	S4
A01G047600v1	S3	S4
A01G047700v1	S2	S3
A01G048100v1	S2	S3
A01G048900v1	S2	S3
A01G049600v1	S1	S2
A01G049700v1	S1	S2
A01G049800v1	S1	S2
A01G050100v1	S4	S5
A01G050300v1	S1	S3
A01G050600v1	S3	S1
A01G050800v1	S1	S3
A01G051000v1	S4	S3
A01G051100v1	S3	S4
A01G051900v1	S2	S1
A01G052600v1	S2	S3
A01G052800v1	S2	S5
A01G052900v1	S2	S5
A01G053000v1	S2	S3
A01G053300v1	S4	S3
A01G054300v1	S3	S2
A01G054900v1	S3	S2
A01G055000v1	S6	S5
A01G055400v1	S2	S3
A01G056200v1	S4	S2
A01G056300v1	S6	S3
A01G056800v1	S2	S6
A01G058100v1	S3	S4
A01G058500v1	S2	S1
A01G058600v1	S6	S2
A01G058800v1	S3	S2
A01G058900v1	S1	S2
A01G059000v1	S5	S2
A01G059200v1	S1	S5
A01G060400v1	S2	S3
A01G061200v1	S1	S3
A01G062100v1	S4	S3
A01G062200v1	S3	S4
A01G062600v1	S6	S2
A01G062800v1	S3	S2
A01G062900v1	S2	S3
A01G063100v1	S2	S3
A01G063600v1	S1	S3
A01G063800v1	S3	S4
A01G064600v1	S3	S2
A01G064700v1	S3	S2
A01G065000v1	S2	S3
A01G065200v1	S3	S4
A01G065400v1	S4	S3
A01G065600v1	S2	S3
A01G066300v1	S3	S1
A01G066400v1	S5	S1
A01G067300v1	S3	S1
A01G067600v1	S1	S5
A01G067800v1	S2	S1
A01G067900v1	S1	S2
A01G068000v1	S4	S2
A01G068300v1	S4	S1
A01G068400v1	S3	S2
A01G068700v1	S3	S2
A01G069300v1	S1	S3
A01G069500v1	S3	S4
A01G070000v1	S4	S3
A01G070800v1	S2	S4
A01G071600v1	S3	S2
A01G072000v1	S4	S1
A01G072200v1	S4	S3
A01G072900v1	S3	S2
A01G073100v1	S3	S2
A01G073900v1	S5	S4
A01G074000v1	S3	S4
A01G074400v1	S5	S2
A01G075000v1	S6	S2
A01G075800v1	S3	S1
A01G075900v1	S6	S3
A01G076300v1	S3	S4
A01G076600v1	S4	S3
A01G076700v1	S4	S5
A01G076900v1	S3	S4
A01G077000v1	S2	S3
A01G077100v1	S4	S3
A01G077300v1	S3	S1
A01G077500v1	S1	S3
A01G077900v1	S2	S3
A01G078300v1	S2	S3
A01G078500v1	S4	S2
A01G078600v1	S3	S4
A01G078700v1	S3	S2
A01G078800v1	S4	S2
A01G079100v1	S5	S3
A01G080600v1	S3	S4
A01G080900v1	S3	S1
A01G081600v1	S3	S1
A01G081900v1	S3	S2
A01G082200v1	S1	S3
A01G082400v1	S3	S4
A01G082500v1	S3	S2
A01G083200v1	S1	S3
A01G083400v1	S3	S2
A01G083800v1	S1	S2
A01G084500v1	S3	S2
A01G084600v1	S5	S4
A01G084800v1	S2	S3
A01G084900v1	S3	S5
A01G085700v1	S1	S2
A01G085800v1	S1	S3
A01G086900v1	S1	S3
A01G087000v1	S3	S4
A01G087600v1	S4	S3
A01G087900v1	S3	S4
A01G089400v1	S4	S5
A01G089500v1	S4	S5
A01G089600v1	S5	S3
A01G090400v1	S3	S4
A01G090600v1	S1	S3
A01G091000v1	S2	S3
A01G091900v1	S3	S4
A01G092200v1	S3	S2
A01G092400v1	S3	S4
A01G092800v1	S4	S3
A01G092900v1	S4	S3
A01G093900v1	S4	S3
A01G094300v1	S4	S3
A01G094700v1	S4	S1
A01G096800v1	S5	S4
A01G097000v1	S4	S3
A01G097100v1	S4	S3
A01G097200v1	S3	S5
A01G097800v1	S2	S3
A01G098200v1	S4	S2
A01G098400v1	S4	S3
A01G098700v1	S3	S2
A01G099700v1	S3	S1
A01G100200v1	S2	S3
A01G100400v1	S3	S4
A01G100600v1	S4	S3
A01G101100v1	S3	S4
A01G101500v1	S1	S2
A01G101600v1	S2	S3
A01G102500v1	S3	S2
A01G102600v1	S3	S4
A01G102700v1	S4	S5
A01G102800v1	S4	S5
A01G103300v1	S5	S3
A01G103400v1	S5	S3
A01G103500v1	S4	S3
A01G103800v1	S3	S4
A01G103900v1	S5	S3
A01G104000v1	S1	S3
A01G104200v1	S4	S3
A01G105000v1	S3	S4
A01G105200v1	S1	S2
A01G105800v1	S1	S2
A01G106000v1	S1	S3
A01G106300v1	S1	S2
A01G106400v1	S3	S2
A01G107100v1	S1	S3
A01G107300v1	S2	S3
A01G108000v1	S2	S3
A01G108100v1	S1	S2
A01G108600v1	S1	S2
A01G108700v1	S3	S2
A01G109000v1	S4	S5
A01G109100v1	S2	S3
A01G109500v1	S2	S3
A01G110000v1	S2	S3
A01G110700v1	S3	S5
A01G111100v1	S3	S4
A01G111500v1	S4	S5
A01G111600v1	S4	S3
A01G111900v1	S4	S3
A01G112000v1	S2	S3
A01G112100v1	S3	S4
A01G112400v1	S6	S3
A01G112600v1	S3	S4
A01G113400v1	S2	S3
A01G113800v1	S4	S3
A01G113900v1	S4	S3
A01G114000v1	S1	S3
A01G114400v1	S4	S3
A01G114500v1	S2	S3
A01G114800v1	S2	S3
A01G115000v1	S5	S4
A01G115100v1	S4	S2
A01G116200v1	S2	S3
A01G117100v1	S1	S2
A01G118500v1	S4	S3
A01G118800v1	S4	S3
A01G119700v1	S1	S3
A01G120100v1	S4	S5
A01G121000v1	S4	S1
A01G121200v1	S2	S5
A01G121500v1	S5	S1
A01G121700v1	S4	S3
A01G121900v1	S3	S1
A01G122200v1	S1	S2
A01G122700v1	S3	S4
A01G123100v1	S2	S3
A01G124100v1	S3	S2
A01G124200v1	S3	S2
A01G124800v1	S4	S3
A01G124900v1	S3	S4
A01G125200v1	S4	S3
A01G125300v1	S3	S4
A01G126700v1	S3	S2
A01G127200v1	S4	S3
A01G127900v1	S3	S4
A01G128000v1	S2	S3
A01G128900v1	S1	S2
A01G129100v1	S3	S4
A01G129300v1	S2	S4
A01G129800v1	S3	S2
A01G130700v1	S3	S4
A01G131200v1	S3	S4
A01G131300v1	S3	S2
A01G132300v1	S3	S5
A01G132800v1	S4	S3
A01G133200v1	S3	S2
A01G133300v1	S2	S3
A01G133400v1	S1	S2
A01G134700v1	S1	S3
A01G134800v1	S1	S2
A01G134900v1	S3	S5
A01G135700v1	S5	S1
A01G136000v1	S3	S6
A01G136400v1	S3	S4
A01G136900v1	S3	S4
A01G137000v1	S1	S2
A01G137100v1	S1	S3
A01G138300v1	S2	S3
A01G138500v1	S2	S1
A01G138700v1	S4	S3
A01G138800v1	S3	S1
A01G139200v1	S3	S4
A01G139400v1	S3	S2
A01G140000v1	S4	S5
A01G140800v1	S3	S2
A01G141000v1	S4	S3
A01G141100v1	S4	S3
A01G141500v1	S3	S4
A01G141700v1	S2	S3
A01G141800v1	S1	S3
A01G141900v1	S5	S1
A01G142000v1	S1	S2
A01G142900v1	S3	S2
A01G143400v1	S3	S2
A01G143500v1	S3	S2
A01G143900v1	S4	S5
A01G144600v1	S3	S2
A01G144700v1	S3	S2
A01G144800v1	S3	S2
A01G146500v1	S2	S3
A01G146900v1	S5	S1
A01G147900v1	S4	S3
A01G148800v1	S3	S2
A01G149100v1	S3	S4
A01G149300v1	S3	S2
A01G150400v1	S3	S4
A01G150800v1	S2	S3
A01G151100v1	S4	S5
A01G151200v1	S3	S6
A01G151300v1	S4	S3
A01G151400v1	S3	S1
A01G151600v1	S2	S3
A01G152200v1	S2	S3
A01G153700v1	S2	S4
A01G154000v1	S3	S5
A01G154400v1	S2	S1
A01G155800v1	S4	S5
A01G155900v1	S4	S5
A01G156700v1	S2	S3
A01G157100v1	S2	S3
A01G157400v1	S3	S4
A01G157800v1	S1	S3
A01G158200v1	S3	S4
A01G160400v1	S1	S2
A01G160700v1	S2	S3
A01G161400v1	S2	S4
A01G162700v1	S1	S3
A01G162900v1	S1	S2
A01G163800v1	S4	S1
A01G164600v1	S1	S3
A01G165100v1	S5	S1
A01G165900v1	S2	S3
A01G166400v1	S2	S3
A01G167200v1	S2	S3
A01G167700v1	S4	S3
A01G167900v1	S3	S5
A01G168100v1	S5	S1
A01G168500v1	S4	S3
A01G168800v1	S3	S2
A01G169100v1	S3	S4
A01G169200v1	S2	S1
A01G169300v1	S3	S4
A01G169400v1	S6	S3
A01G169500v1	S2	S3
A01G169600v1	S3	S1
A01G169800v1	S4	S3
A01G170000v1	S3	S2
A01G170500v1	S3	S4
A01G172900v1	S3	S4
A01G173900v1	S2	S3
A01G174000v1	S1	S2
A01G174400v1	S5	S4
A01G175100v1	S6	S5
A01G175400v1	S2	S3
A01G175600v1	S2	S3
A01G176100v1	S6	S3
A01G178000v1	S3	S2
A01G178200v1	S3	S2
A01G178500v1	S2	S3
A01G179800v1	S4	S5
A01G179900v1	S2	S3
A01G180000v1	S3	S6
A01G180500v1	S6	S2
A01G180700v1	S3	S5
A01G181700v1	S1	S3
A01G182100v1	S3	S4
A01G182300v1	S3	S2
A01G182400v1	S2	S3
A01G182900v1	S3	S4
A01G183600v1	S4	S5
A01G183700v1	S4	S5
A01G184300v1	S1	S3
A01G184400v1	S4	S5
A01G184500v1	S2	S3
A01G184900v1	S3	S2
A01G185100v1	S1	S2
A01G185200v1	S2	S3
A01G185400v1	S3	S4
A01G185500v1	S2	S3
A01G186200v1	S4	S1
A01G186400v1	S3	S4
A01G186500v1	S4	S3
A01G188400v1	S4	S3
A01G188900v1	S3	S1
A01G189400v1	S4	S3
A01G190300v1	S1	S3
A01G191700v1	S1	S2
A01G191900v1	S4	S1
A01G192000v1	S4	S3
A01G193000v1	S4	S3
A01G195400v1	S3	S4
A01G195700v1	S2	S3
A01G197300v1	S5	S1
A01G197600v1	S1	S4
A01G197800v1	S4	S5
A01G198200v1	S4	S3
A01G199200v1	S5	S4
A01G199700v1	S2	S3
A01G200900v1	S2	S3
A01G201000v1	S2	S3
A01G201500v1	S3	S4
A01G201700v1	S3	S4
A01G202100v1	S3	S4
A01G203100v1	S1	S3
A01G204100v1	S3	S4
A01G204600v1	S4	S3
A01G204700v1	S3	S2
A01G204900v1	S6	S3
A01G205200v1	S2	S3
A01G205400v1	S1	S2
A01G205700v1	S4	S1
A01G206000v1	S3	S1
A01G206900v1	S4	S1
A01G207400v1	S2	S3
A01G207900v1	S2	S3
A01G208200v1	S1	S3
A01G208400v1	S4	S3
A01G208900v1	S5	S4
A01G209400v1	S4	S3
A01G210300v1	S1	S3
A01G210800v1	S4	S5
A01G212500v1	S3	S4
A01G213300v1	S4	S3
A01G213400v1	S3	S6
A01G214300v1	S4	S5
A01G214600v1	S4	S3
A01G215400v1	S4	S3
A01G216200v1	S1	S2
A01G216900v1	S1	S3
A01G217700v1	S2	S3
A01G219000v1	S4	S1
A01G219100v1	S4	S1
A01G219300v1	S1	S2
A01G219800v1	S3	S4
A01G219900v1	S1	S2
A01G220800v1	S3	S2
A01G221200v1	S5	S4
A01G221900v1	S5	S1
A01G222000v1	S3	S2
A01G222400v1	S3	S2
A01G222900v1	S3	S2
A01G223000v1	S1	S2
A01G223100v1	S1	S5
A01G223300v1	S3	S2
A01G223800v1	S2	S3
A01G224400v1	S1	S3
A01G224500v1	S1	S3
A01G225400v1	S1	S2
A01G225700v1	S6	S5
A01G226300v1	S4	S3
A01G226800v1	S3	S2
A01G227300v1	S4	S5
A01G227600v1	S1	S3
A01G227800v1	S3	S4
A01G229100v1	S3	S1
A01G229200v1	S5	S1
A01G230100v1	S1	S3
A01G230900v1	S3	S4
A01G231700v1	S1	S2
A01G232600v1	S4	S5
A01G233400v1	S2	S3
A01G233500v1	S2	S1
A01G233600v1	S6	S2
A01G233700v1	S3	S2
A01G233900v1	S3	S4
A01G236600v1	S1	S3
A01G237200v1	S1	S3
A01G237400v1	S1	S2
A01G237700v1	S1	S2
A01G238400v1	S2	S3
A01G239300v1	S3	S2
A01G239400v1	S4	S3
A01G240100v1	S4	S3
A01G240400v1	S5	S4
A01G243300v1	S3	S2
A01G243400v1	S2	S1
A01G243900v1	S2	S3
A01G244000v1	S4	S3
A01G244700v1	S3	S2
A01G245300v1	S5	S1
A01G245500v1	S5	S4
A01G245700v1	S4	S3
A01G245800v1	S3	S4
A01G246900v1	S3	S4
A01G248700v1	S4	S3
A01G249100v1	S3	S4
A01G249400v1	S2	S3
A01G250500v1	S5	S6
A01G250700v1	S2	S5
A01G251700v1	S3	S1
A01G252100v1	S5	S4
A01G252500v1	S1	S2
A01G252600v1	S4	S3
A01G253800v1	S3	S1
A01G254200v1	S2	S3
A01G254500v1	S4	S3
A01G254700v1	S1	S2
A01G255500v1	S5	S4
A01G255900v1	S2	S3
A01G256000v1	S3	S2
A01G256100v1	S3	S2
A01G256200v1	S3	S2
A01G256700v1	S3	S2
A01G257200v1	S1	S3
A01G258900v1	S3	S2
A01G259200v1	S4	S3
A01G259300v1	S5	S1
A01G260400v1	S3	S4
A01G260900v1	S3	S2
A01G261000v1	S4	S3
A01G261100v1	S2	S3
A01G261700v1	S3	S4
A01G262500v1	S4	S3
A01G263000v1	S6	S3
A01G263400v1	S3	S2
A01G263500v1	S3	S6
A01G263700v1	S3	S6
A01G263800v1	S3	S4
A01G263900v1	S4	S6
A02G000600v1	S5	S1
A02G000700v1	S5	S1
A02G003600v1	S3	S2
A02G004000v1	S3	S1
A02G004900v1	S4	S3
A02G006100v1	S1	S3
A02G006200v1	S2	S3
A02G006300v1	S1	S3
A02G006400v1	S3	S5
A02G006500v1	S2	S3
A02G006600v1	S2	S3
A02G006700v1	S1	S3
A02G008400v1	S3	S1
A02G010100v1	S1	S5
A02G011300v1	S3	S5
A02G011700v1	S3	S2
A02G012200v1	S5	S4
A02G012600v1	S4	S2
A02G012700v1	S3	S1
A02G013100v1	S3	S2
A02G013400v1	S3	S2
A02G013700v1	S1	S3
A02G014100v1	S3	S2
A02G014500v1	S5	S4
A02G015200v1	S3	S2
A02G015900v1	S5	S3
A02G016000v1	S1	S3
A02G016200v1	S3	S2
A02G016700v1	S3	S2
A02G016800v1	S1	S2
A02G017000v1	S1	S2
A02G017100v1	S3	S2
A02G017200v1	S3	S2
A02G017400v1	S3	S2
A02G017500v1	S3	S2
A02G019300v1	S3	S1
A02G019500v1	S1	S2
A02G019600v1	S3	S1
A02G019700v1	S1	S2
A02G020100v1	S3	S5
A02G020400v1	S2	S3
A02G020500v1	S2	S1
A02G020600v1	S1	S2
A02G020700v1	S4	S2
A02G020800v1	S3	S2
A02G020900v1	S2	S1
A02G021100v1	S3	S2
A02G021200v1	S6	S2
A02G021500v1	S1	S2
A02G021600v1	S1	S2
A02G022200v1	S3	S4
A02G022400v1	S1	S2
A02G022500v1	S1	S2
A02G022700v1	S1	S2
A02G022800v1	S1	S2
A02G022900v1	S1	S2
A02G023800v1	S1	S2
A02G024300v1	S1	S2
A02G024600v1	S3	S4
A02G025100v1	S3	S2
A02G025300v1	S2	S3
A02G025700v1	S2	S1
A02G026300v1	S5	S1
A02G026500v1	S1	S3
A02G026700v1	S3	S2
A02G027200v1	S1	S2
A02G027500v1	S2	S3
A02G028100v1	S1	S2
A02G028800v1	S2	S1
A02G028900v1	S5	S4
A02G029000v1	S2	S5
A02G029100v1	S2	S3
A02G029300v1	S1	S3
A02G029400v1	S1	S2
A02G029500v1	S3	S2
A02G029800v1	S3	S1
A02G029900v1	S1	S3
A02G030100v1	S4	S3
A02G030500v1	S2	S3
A02G031100v1	S3	S2
A02G031900v1	S5	S3
A02G032900v1	S2	S3
A02G033100v1	S5	S3
A02G033300v1	S2	S3
A02G033400v1	S2	S5
A02G033500v1	S2	S3
A02G033600v1	S3	S5
A02G033800v1	S3	S2
A02G033900v1	S3	S4
A02G034000v1	S2	S3
A02G034500v1	S2	S3
A02G034700v1	S1	S3
A02G035200v1	S1	S2
A02G035500v1	S1	S2
A02G037200v1	S4	S3
A02G037800v1	S4	S3
A02G038200v1	S3	S2
A02G038900v1	S3	S2
A02G039400v1	S2	S3
A02G040000v1	S2	S3
A02G040100v1	S3	S6
A02G041100v1	S6	S5
A02G041300v1	S3	S2
A02G041800v1	S3	S2
A02G042300v1	S5	S3
A02G042800v1	S2	S3
A02G042900v1	S4	S3
A02G043700v1	S1	S3
A02G045500v1	S5	S4
A02G046300v1	S4	S3
A02G046600v1	S5	S3
A02G047000v1	S1	S3
A02G047200v1	S3	S4
A02G047500v1	S3	S2
A02G047600v1	S2	S3
A02G048700v1	S3	S2
A02G048800v1	S4	S5
A02G049300v1	S6	S5
A02G049800v1	S3	S2
A02G050000v1	S1	S2
A02G050100v1	S2	S1
A02G050500v1	S5	S4
A02G050600v1	S3	S4
A02G050900v1	S4	S5
A02G051300v1	S4	S3
A02G052300v1	S3	S2
A02G053000v1	S3	S2
A02G053100v1	S3	S2
A02G053800v1	S3	S1
A02G053900v1	S3	S6
A02G054400v1	S1	S2
A02G054900v1	S5	S4
A02G055700v1	S5	S6
A02G055900v1	S2	S3
A02G056000v1	S1	S2
A02G056900v1	S2	S1
A02G058300v1	S4	S1
A02G058600v1	S2	S3
A02G059100v1	S2	S3
A02G060000v1	S4	S3
A02G060400v1	S1	S2
A02G060700v1	S3	S2
A02G060800v1	S3	S2
A02G061800v1	S3	S2
A02G062100v1	S3	S1
A02G062200v1	S3	S1
A02G062400v1	S4	S1
A02G062500v1	S3	S2
A02G062900v1	S3	S2
A02G063200v1	S3	S2
A02G063300v1	S4	S1
A02G063400v1	S4	S2
A02G063600v1	S4	S3
A02G063900v1	S5	S1
A02G064000v1	S6	S2
A02G064100v1	S1	S3
A02G065000v1	S2	S1
A02G065100v1	S2	S3
A02G066000v1	S2	S3
A02G066300v1	S2	S1
A02G066500v1	S3	S4
A02G066700v1	S1	S3
A02G067400v1	S1	S2
A02G068400v1	S5	S3
A02G068500v1	S5	S4
A02G068600v1	S5	S4
A02G069300v1	S3	S4
A02G069400v1	S2	S3
A02G069500v1	S3	S4
A02G069600v1	S3	S4
A02G069700v1	S2	S3
A02G069900v1	S4	S3
A02G070000v1	S5	S6
A02G071600v1	S3	S1
A02G072400v1	S4	S5
A02G072700v1	S3	S1
A02G072900v1	S5	S4
A02G073500v1	S1	S3
A02G073900v1	S4	S3
A02G074100v1	S4	S3
A02G074200v1	S1	S4
A02G074600v1	S3	S2
A02G074800v1	S1	S3
A02G075500v1	S5	S4
A02G076000v1	S3	S4
A02G076100v1	S3	S2
A02G076300v1	S3	S2
A02G076400v1	S1	S3
A02G077300v1	S3	S2
A02G077500v1	S3	S4
A02G078000v1	S4	S3
A02G078700v1	S1	S2
A02G078800v1	S2	S1
A02G079100v1	S4	S3
A02G079200v1	S5	S1
A02G079500v1	S5	S1
A02G079600v1	S4	S1
A02G079900v1	S1	S3
A02G080400v1	S4	S2
A02G080600v1	S5	S3
A02G081700v1	S3	S4
A02G081800v1	S4	S5
A02G083100v1	S4	S3
A02G083300v1	S1	S2
A02G083400v1	S3	S2
A02G083900v1	S3	S4
A02G084600v1	S2	S3
A02G085100v1	S1	S3
A02G085900v1	S3	S4
A02G086100v1	S3	S1
A02G086400v1	S3	S4
A02G087400v1	S3	S2
A02G087800v1	S3	S4
A02G088400v1	S3	S2
A02G088500v1	S3	S2
A02G089800v1	S2	S3
A02G089900v1	S1	S3
A02G090600v1	S4	S3
A02G090900v1	S6	S3
A02G091300v1	S3	S4
A02G091400v1	S2	S3
A02G091600v1	S2	S5
A02G092000v1	S3	S4
A02G092500v1	S3	S1
A02G092700v1	S3	S2
A02G092800v1	S3	S2
A02G093400v1	S2	S3
A02G093700v1	S5	S4
A02G093800v1	S4	S5
A02G093900v1	S2	S1
A02G094000v1	S5	S1
A02G094300v1	S2	S3
A02G095100v1	S4	S2
A02G095600v1	S5	S4
A02G095700v1	S2	S3
A02G096300v1	S3	S1
A02G097000v1	S5	S6
A02G097300v1	S4	S3
A02G097800v1	S3	S4
A02G097900v1	S2	S4
A02G098000v1	S3	S4
A02G098200v1	S4	S3
A02G099100v1	S3	S2
A02G099800v1	S1	S3
A02G100000v1	S2	S4
A02G101000v1	S3	S4
A02G101400v1	S2	S3
A02G101500v1	S3	S4
A02G102300v1	S4	S5
A02G102400v1	S4	S5
A02G102600v1	S1	S3
A02G103400v1	S2	S3
A02G103700v1	S6	S3
A02G103800v1	S2	S1
A02G104900v1	S4	S3
A02G105000v1	S4	S3
A02G106100v1	S1	S3
A02G106700v1	S3	S1
A02G106900v1	S2	S3
A02G107200v1	S2	S3
A02G108300v1	S2	S3
A02G109500v1	S1	S5
A02G109900v1	S2	S6
A02G110600v1	S1	S2
A02G111400v1	S3	S2
A02G111900v1	S3	S2
A02G112000v1	S6	S2
A02G112400v1	S3	S4
A02G112600v1	S2	S3
A02G112700v1	S3	S2
A02G113300v1	S3	S5
A02G113400v1	S1	S3
A02G115600v1	S3	S1
A02G116700v1	S1	S3
A02G116800v1	S3	S5
A02G118100v1	S2	S3
A02G118700v1	S3	S4
A02G120200v1	S3	S2
A02G120800v1	S3	S4
A02G121000v1	S2	S3
A02G121400v1	S4	S3
A02G121900v1	S3	S4
A02G122400v1	S1	S2
A02G123200v1	S1	S3
A02G123600v1	S3	S5
A02G124300v1	S3	S1
A02G124500v1	S1	S3
A02G125200v1	S3	S4
A02G125800v1	S2	S3
A02G126300v1	S2	S3
A02G126700v1	S3	S2
A02G126800v1	S3	S4
A02G127000v1	S3	S2
A02G128100v1	S4	S5
A02G128300v1	S3	S2
A02G128700v1	S1	S3
A02G129100v1	S2	S3
A02G129300v1	S2	S3
A02G129500v1	S3	S4
A02G129600v1	S2	S3
A02G130000v1	S1	S3
A02G130100v1	S1	S2
A02G130400v1	S3	S2
A02G131000v1	S3	S4
A02G131400v1	S1	S3
A02G131900v1	S2	S3
A02G132200v1	S2	S3
A02G132500v1	S4	S3
A02G133700v1	S3	S5
A02G133800v1	S6	S2
A02G134200v1	S2	S3
A02G134300v1	S5	S3
A02G134800v1	S2	S5
A02G135200v1	S4	S5
A02G135400v1	S3	S4
A02G135500v1	S2	S1
A02G135600v1	S3	S4
A02G135700v1	S2	S3
A02G135800v1	S3	S4
A02G136000v1	S2	S3
A02G136400v1	S3	S4
A02G137500v1	S3	S4
A02G137600v1	S4	S5
A02G137800v1	S2	S3
A02G137900v1	S2	S1
A02G138800v1	S3	S4
A02G139400v1	S5	S2
A02G139500v1	S3	S2
A02G139700v1	S3	S2
A02G140000v1	S3	S4
A02G140600v1	S5	S4
A02G140900v1	S4	S3
A02G141700v1	S2	S3
A02G141900v1	S3	S4
A02G142800v1	S1	S3
A02G142900v1	S5	S3
A02G144700v1	S6	S3
A02G145000v1	S2	S3
A02G145600v1	S2	S4
A02G145800v1	S3	S4
A02G146200v1	S6	S2
A02G146500v1	S4	S1
A02G146600v1	S1	S3
A02G147100v1	S5	S2
A02G147200v1	S5	S3
A02G147600v1	S2	S3
A02G149900v1	S4	S1
A02G150200v1	S3	S4
A02G150300v1	S1	S3
A02G150500v1	S1	S3
A02G150700v1	S2	S3
A02G151600v1	S5	S3
A02G151900v1	S5	S4
A02G152600v1	S1	S2
A02G153400v1	S2	S3
A02G153700v1	S2	S3
A02G153800v1	S3	S2
A02G154900v1	S3	S4
A02G155200v1	S5	S2
A02G155600v1	S3	S5
A02G155700v1	S3	S2
A02G156200v1	S3	S4
A02G156800v1	S3	S4
A02G157300v1	S4	S5
A02G157500v1	S1	S3
A02G157700v1	S1	S2
A02G157800v1	S4	S3
A02G158000v1	S4	S5
A02G158300v1	S1	S2
A02G158700v1	S4	S3
A02G159000v1	S3	S1
A02G159200v1	S2	S3
A02G159500v1	S3	S2
A02G159600v1	S3	S2
A02G159800v1	S4	S3
A02G159900v1	S4	S3
A02G160300v1	S1	S3
A02G161000v1	S3	S1
A02G162000v1	S2	S3
A02G162100v1	S4	S3
A02G163700v1	S5	S6
A02G164100v1	S3	S2
A02G164200v1	S3	S1
A02G164500v1	S3	S4
A02G165300v1	S6	S2
A02G165500v1	S2	S3
A02G165800v1	S3	S4
A02G166800v1	S1	S3
A02G167000v1	S2	S3
A02G167500v1	S3	S4
A02G168100v1	S2	S3
A02G169000v1	S5	S3
A02G169100v1	S1	S3
A02G169200v1	S4	S3
A02G169900v1	S3	S4
A02G171300v1	S2	S3
A02G171800v1	S1	S2
A02G173000v1	S3	S2
A02G173400v1	S2	S6
A02G173600v1	S2	S3
A02G174500v1	S4	S5
A02G175100v1	S4	S3
A02G175500v1	S1	S3
A02G175700v1	S3	S2
A02G177300v1	S3	S1
A02G178200v1	S1	S3
A02G179000v1	S3	S2
A02G179600v1	S3	S2
A02G180100v1	S1	S3
A02G180400v1	S1	S2
A02G180500v1	S2	S3
A02G180800v1	S2	S3
A02G181300v1	S3	S2
A02G181500v1	S3	S2
A02G183800v1	S1	S3
A02G184200v1	S5	S4
A02G184700v1	S3	S2
A02G185600v1	S3	S4
A02G185700v1	S2	S3
A02G187300v1	S2	S3
A02G188100v1	S1	S3
A02G188300v1	S1	S2
A02G188800v1	S4	S3
A02G190200v1	S4	S3
A02G191700v1	S2	S5
A02G192700v1	S1	S2
A02G192800v1	S5	S3
A02G194000v1	S4	S3
A02G194400v1	S3	S4
A02G195300v1	S2	S3
A02G195400v1	S2	S3
A02G196100v1	S2	S5
A02G196300v1	S2	S4
A02G196600v1	S1	S2
A02G197300v1	S3	S4
A02G197500v1	S3	S1
A02G198300v1	S5	S6
A02G199600v1	S3	S2
A02G200200v1	S4	S3
A02G200300v1	S6	S1
A02G200400v1	S3	S2
A02G201200v1	S4	S3
A02G201500v1	S1	S3
A02G201700v1	S1	S5
A02G202200v1	S4	S3
A02G203300v1	S2	S3
A02G203400v1	S2	S3
A02G204400v1	S5	S3
A02G204500v1	S5	S3
A02G205500v1	S3	S2
A02G206900v1	S3	S4
A02G207200v1	S5	S4
A02G207600v1	S3	S4
A02G208900v1	S3	S4
A02G209200v1	S2	S3
A02G209400v1	S5	S3
A02G209700v1	S1	S2
A02G210400v1	S3	S4
A02G210700v1	S4	S5
A02G210800v1	S4	S3
A02G211000v1	S4	S3
A02G211300v1	S4	S3
A02G211900v1	S4	S3
A02G212200v1	S4	S5
A02G212400v1	S4	S3
A02G212500v1	S5	S4
A03G000300v1	S3	S6
A03G000400v1	S2	S3
A03G000500v1	S2	S6
A03G000600v1	S2	S6
A03G000700v1	S3	S6
A03G000800v1	S2	S6
A03G000900v1	S2	S6
A03G001000v1	S2	S6
A03G001100v1	S2	S6
A03G001500v1	S2	S3
A03G002300v1	S5	S4
A03G002800v1	S4	S3
A03G002900v1	S1	S2
A03G003800v1	S3	S5
A03G004700v1	S5	S3
A03G004900v1	S4	S3
A03G005800v1	S3	S4
A03G006100v1	S3	S2
A03G006300v1	S1	S3
A03G006500v1	S1	S2
A03G006600v1	S3	S2
A03G006700v1	S2	S1
A03G007600v1	S3	S4
A03G008200v1	S4	S2
A03G008500v1	S2	S3
A03G010200v1	S6	S3
A03G011000v1	S1	S2
A03G011100v1	S3	S2
A03G011400v1	S3	S2
A03G011500v1	S1	S3
A03G011600v1	S2	S3
A03G011700v1	S1	S3
A03G011800v1	S1	S2
A03G012600v1	S3	S4
A03G012800v1	S1	S2
A03G012900v1	S1	S2
A03G013300v1	S1	S3
A03G014000v1	S2	S3
A03G014900v1	S3	S2
A03G015000v1	S4	S3
A03G015600v1	S3	S4
A03G015700v1	S3	S2
A03G016100v1	S4	S1
A03G017300v1	S1	S3
A03G017400v1	S2	S4
A03G017800v1	S3	S1
A03G018100v1	S1	S3
A03G018200v1	S1	S4
A03G018400v1	S3	S2
A03G019300v1	S1	S3
A03G019400v1	S1	S3
A03G019600v1	S3	S4
A03G019800v1	S3	S1
A03G020100v1	S2	S3
A03G020700v1	S3	S2
A03G021300v1	S3	S2
A03G022100v1	S2	S3
A03G022500v1	S4	S3
A03G022700v1	S5	S1
A03G023000v1	S3	S2
A03G023500v1	S5	S2
A03G023800v1	S4	S3
A03G024200v1	S6	S1
A03G024600v1	S1	S3
A03G025100v1	S2	S3
A03G025200v1	S1	S2
A03G025300v1	S1	S2
A03G025600v1	S1	S3
A03G025800v1	S3	S1
A03G026000v1	S3	S2
A03G027000v1	S2	S4
A03G027600v1	S1	S3
A03G030000v1	S3	S1
A03G030900v1	S3	S5
A03G031800v1	S2	S3
A03G031900v1	S2	S3
A03G032200v1	S4	S1
A03G032300v1	S2	S1
A03G032400v1	S4	S3
A03G032800v1	S3	S4
A03G033000v1	S3	S4
A03G033900v1	S2	S3
A03G034600v1	S4	S2
A03G034900v1	S5	S6
A03G035200v1	S3	S4
A03G035400v1	S2	S3
A03G035800v1	S5	S4
A03G036100v1	S1	S3
A03G037300v1	S4	S3
A03G037700v1	S4	S3
A03G039100v1	S4	S3
A03G039500v1	S2	S3
A03G040000v1	S4	S3
A03G040300v1	S3	S1
A03G040400v1	S4	S5
A03G040500v1	S3	S1
A03G040800v1	S2	S3
A03G041700v1	S6	S1
A03G042300v1	S2	S3
A03G042700v1	S1	S2
A03G043700v1	S1	S2
A03G043900v1	S1	S3
A03G044600v1	S4	S5
A03G045000v1	S4	S3
A03G045300v1	S3	S2
A03G045500v1	S4	S3
A03G048500v1	S3	S4
A03G049300v1	S3	S4
A03G050000v1	S1	S3
A03G050200v1	S6	S1
A03G050800v1	S4	S5
A03G051000v1	S3	S4
A03G052500v1	S2	S1
A03G052600v1	S3	S4
A03G053600v1	S3	S2
A03G054200v1	S3	S2
A03G054800v1	S5	S4
A03G054900v1	S3	S2
A03G055700v1	S3	S2
A03G055800v1	S3	S2
A03G056100v1	S5	S4
A03G056600v1	S4	S3
A03G056700v1	S3	S2
A03G056900v1	S4	S3
A03G057000v1	S2	S3
A03G057100v1	S2	S3
A03G057400v1	S4	S3
A03G058000v1	S3	S2
A03G058700v1	S2	S3
A03G059200v1	S4	S3
A03G059600v1	S4	S3
A03G059700v1	S4	S3
A03G059800v1	S4	S5
A03G060200v1	S5	S1
A03G060400v1	S2	S3
A03G061100v1	S2	S3
A03G061300v1	S3	S4
A03G062000v1	S3	S2
A03G062400v1	S2	S3
A03G062500v1	S3	S2
A03G062700v1	S5	S1
A03G062800v1	S3	S2
A03G063000v1	S2	S5
A03G063400v1	S3	S1
A03G064500v1	S2	S3
A03G065600v1	S3	S1
A03G066100v1	S5	S4
A03G066200v1	S2	S3
A03G066500v1	S2	S3
A03G066600v1	S2	S3
A03G067400v1	S1	S2
A03G067800v1	S3	S2
A03G067900v1	S4	S2
A03G068000v1	S4	S5
A03G068300v1	S4	S5
A03G069300v1	S2	S3
A03G069500v1	S2	S1
A03G069600v1	S3	S4
A03G069900v1	S2	S3
A03G070100v1	S5	S2
A03G070300v1	S2	S3
A03G070800v1	S3	S4
A03G071200v1	S5	S1
A03G071800v1	S1	S3
A03G072300v1	S6	S3
A03G072700v1	S4	S5
A03G072800v1	S4	S5
A03G073400v1	S3	S5
A03G074200v1	S3	S2
A03G075100v1	S5	S4
A03G076300v1	S4	S3
A03G077000v1	S1	S3
A03G077200v1	S3	S4
A03G077400v1	S1	S2
A03G077800v1	S1	S2
A03G078100v1	S1	S3
A03G078400v1	S1	S3
A03G078900v1	S5	S3
A03G079000v1	S3	S2
A03G079700v1	S2	S3
A03G080200v1	S4	S3
A03G081600v1	S2	S3
A03G081700v1	S1	S3
A03G082000v1	S4	S2
A03G082700v1	S3	S4
A03G083500v1	S5	S4
A03G083700v1	S2	S3
A03G085000v1	S3	S4
A03G085400v1	S5	S2
A03G086500v1	S4	S1
A03G086900v1	S4	S3
A03G087400v1	S4	S3
A03G088200v1	S4	S3
A03G088600v1	S4	S5
A03G088800v1	S2	S3
A03G089000v1	S2	S3
A03G089600v1	S3	S2
A03G090700v1	S6	S2
A03G090900v1	S3	S4
A03G091000v1	S2	S3
A03G091800v1	S5	S2
A03G092000v1	S2	S3
A03G092200v1	S3	S4
A03G092300v1	S2	S3
A03G092700v1	S1	S3
A03G093300v1	S3	S4
A03G093400v1	S5	S4
A03G093700v1	S3	S4
A03G094000v1	S3	S2
A03G094100v1	S3	S2
A03G094900v1	S2	S3
A03G095000v1	S2	S3
A03G095200v1	S5	S2
A03G095600v1	S4	S5
A03G095800v1	S3	S4
A03G096400v1	S2	S3
A03G096800v1	S4	S3
A03G096900v1	S4	S3
A03G097100v1	S5	S4
A03G097200v1	S2	S4
A03G097500v1	S2	S3
A03G097900v1	S2	S3
A03G098000v1	S1	S3
A03G099000v1	S5	S6
A03G099100v1	S4	S5
A03G099200v1	S2	S3
A03G099600v1	S2	S4
A03G100000v1	S5	S1
A03G100700v1	S5	S2
A03G100800v1	S3	S4
A03G101200v1	S4	S5
A03G102500v1	S6	S4
A03G103700v1	S4	S2
A03G103800v1	S2	S3
A03G104000v1	S3	S4
A03G104100v1	S3	S2
A03G104200v1	S2	S3
A03G104900v1	S6	S2
A03G105600v1	S2	S1
A03G106200v1	S4	S3
A03G106300v1	S3	S4
A03G109100v1	S3	S4
A03G109500v1	S4	S3
A03G110800v1	S5	S4
A03G111500v1	S3	S2
A03G111900v1	S2	S3
A03G112200v1	S3	S6
A03G113700v1	S2	S3
A03G113900v1	S3	S4
A03G114500v1	S3	S4
A03G115300v1	S4	S3
A03G115700v1	S2	S3
A03G115800v1	S2	S3
A03G116100v1	S2	S3
A03G116600v1	S2	S3
A03G116800v1	S4	S3
A03G117100v1	S3	S2
A03G118300v1	S1	S3
A03G118600v1	S3	S5
A03G118700v1	S4	S3
A03G119400v1	S6	S3
A03G120400v1	S2	S3
A03G121000v1	S4	S3
A03G121700v1	S4	S5
A03G121800v1	S3	S4
A03G121900v1	S2	S3
A03G122000v1	S3	S4
A03G122800v1	S4	S5
A03G123300v1	S3	S4
A03G123900v1	S3	S2
A03G124100v1	S1	S4
A03G125000v1	S5	S2
A03G125100v1	S3	S2
A03G125200v1	S4	S3
A03G125500v1	S3	S1
A03G126000v1	S5	S1
A03G126100v1	S5	S2
A03G126200v1	S3	S2
A03G126300v1	S5	S1
A03G127400v1	S3	S2
A03G127600v1	S1	S2
A03G128100v1	S2	S3
A03G128200v1	S6	S3
A03G128300v1	S4	S3
A03G128400v1	S3	S1
A03G128800v1	S2	S4
A03G129600v1	S2	S3
A03G130000v1	S1	S2
A03G130500v1	S2	S3
A03G130800v1	S2	S3
A03G130900v1	S1	S2
A03G131000v1	S4	S3
A03G131100v1	S3	S2
A03G131200v1	S1	S5
A03G131500v1	S2	S3
A03G132300v1	S4	S5
A03G132500v1	S3	S4
A03G132800v1	S3	S5
A03G133300v1	S2	S3
A03G133800v1	S3	S4
A03G134400v1	S4	S3
A03G134600v1	S4	S3
A03G134700v1	S4	S3
A03G135400v1	S3	S2
A03G135700v1	S4	S2
A03G136000v1	S3	S2
A03G136300v1	S2	S5
A03G136900v1	S5	S4
A03G137000v1	S3	S5
A03G137400v1	S6	S5
A03G137900v1	S2	S4
A03G138400v1	S2	S3
A03G138800v1	S4	S3
A03G139200v1	S2	S1
A03G139900v1	S3	S4
A03G140100v1	S1	S3
A03G141000v1	S5	S4
A03G141500v1	S4	S3
A03G141900v1	S1	S2
A03G142600v1	S3	S2
A03G142700v1	S3	S4
A03G143000v1	S3	S2
A03G143200v1	S5	S6
A03G143800v1	S2	S3
A03G144200v1	S2	S3
A03G144300v1	S2	S6
A03G144400v1	S2	S6
A03G144700v1	S5	S1
A03G145200v1	S4	S3
A03G146100v1	S3	S4
A03G146600v1	S3	S1
A03G146900v1	S3	S4
A03G147500v1	S1	S3
A03G147700v1	S5	S6
A03G148400v1	S3	S2
A03G149400v1	S3	S2
A03G149500v1	S1	S3
A03G149700v1	S2	S4
A03G149800v1	S2	S3
A03G149900v1	S1	S3
A03G150100v1	S2	S6
A03G150600v1	S3	S4
A03G151500v1	S2	S3
A03G151600v1	S4	S5
A03G151800v1	S1	S3
A03G151900v1	S4	S3
A03G152200v1	S2	S3
A03G152600v1	S5	S1
A03G152700v1	S1	S3
A03G152800v1	S4	S5
A03G153500v1	S2	S3
A03G154100v1	S6	S3
A03G154300v1	S2	S3
A03G154700v1	S2	S3
A03G154900v1	S1	S2
A03G155100v1	S2	S3
A03G155400v1	S1	S4
A03G156100v1	S3	S4
A03G156400v1	S2	S3
A03G156900v1	S1	S3
A03G157100v1	S1	S3
A03G157200v1	S1	S3
A03G157500v1	S1	S3
A03G157600v1	S3	S4
A03G158000v1	S3	S4
A03G158200v1	S4	S3
A03G158300v1	S2	S4
A03G158400v1	S4	S5
A03G158800v1	S3	S1
A03G160200v1	S3	S2
A03G160800v1	S2	S3
A03G161900v1	S4	S3
A03G162300v1	S1	S3
A03G162600v1	S4	S3
A03G162700v1	S4	S2
A03G162900v1	S3	S2
A03G163300v1	S3	S5
A03G163600v1	S3	S4
A03G164300v1	S4	S3
A03G164400v1	S4	S3
A03G164500v1	S4	S3
A03G164900v1	S4	S5
A03G165200v1	S4	S3
A03G165400v1	S4	S3
A03G165700v1	S4	S3
A03G165900v1	S1	S2
A03G166000v1	S4	S5
A03G166100v1	S2	S3
A03G166300v1	S1	S3
A03G166400v1	S3	S6
A03G167300v1	S3	S4
A03G167700v1	S3	S4
A03G169400v1	S3	S2
A03G169500v1	S3	S2
A03G170500v1	S4	S5
A03G171000v1	S5	S1
A03G171200v1	S3	S2
A03G171500v1	S2	S3
A03G172700v1	S1	S3
A03G173200v1	S4	S2
A03G173300v1	S3	S4
A03G173800v1	S3	S4
A03G174300v1	S5	S1
A03G174400v1	S2	S3
A03G174800v1	S4	S2
A03G175100v1	S1	S2
A03G175200v1	S3	S4
A03G175400v1	S1	S3
A03G176200v1	S6	S2
A03G176300v1	S3	S2
A03G176500v1	S1	S3
A03G176600v1	S2	S3
A03G177300v1	S6	S3
A03G177400v1	S4	S3
A03G177700v1	S2	S3
A03G177800v1	S2	S3
A03G178300v1	S4	S5
A03G178900v1	S4	S5
A03G179800v1	S2	S3
A03G180400v1	S3	S2
A03G180600v1	S4	S2
A03G180700v1	S3	S2
A03G180900v1	S1	S4
A03G184200v1	S2	S3
A03G184300v1	S3	S4
A03G185500v1	S5	S2
A03G185700v1	S4	S3
A03G186100v1	S4	S3
A03G186600v1	S4	S3
A03G187000v1	S3	S2
A03G188200v1	S4	S5
A03G188700v1	S3	S1
A03G189100v1	S2	S3
A03G190600v1	S4	S5
A03G190700v1	S4	S5
A03G192300v1	S3	S2
A03G193300v1	S1	S3
A03G194000v1	S5	S4
A03G194600v1	S1	S2
A03G194800v1	S1	S3
A03G194900v1	S2	S3
A03G195400v1	S4	S3
A03G195900v1	S4	S2
A03G196100v1	S3	S4
A03G196600v1	S2	S3
A03G196800v1	S4	S5
A03G197500v1	S2	S3
A03G197700v1	S1	S3
A03G197800v1	S2	S5
A03G198300v1	S4	S3
A03G198400v1	S4	S3
A03G198500v1	S1	S3
A03G199300v1	S2	S3
A03G199600v1	S1	S2
A03G199700v1	S3	S4
A03G199900v1	S5	S4
A03G200300v1	S5	S3
A03G200400v1	S3	S4
A03G201200v1	S5	S4
A03G201300v1	S5	S4
A03G201500v1	S3	S4
A03G202100v1	S3	S2
A03G202300v1	S4	S3
A03G203100v1	S1	S3
A03G203500v1	S4	S3
A03G204000v1	S2	S3
A03G204700v1	S3	S2
A03G205000v1	S2	S3
A03G205100v1	S2	S3
A03G205500v1	S3	S4
A03G205800v1	S2	S3
A03G207400v1	S4	S3
A03G208800v1	S3	S2
A03G209300v1	S3	S4
A03G209400v1	S3	S4
A03G209900v1	S3	S2
A03G211700v1	S1	S5
A03G211800v1	S3	S4
A03G212100v1	S1	S2
A03G212400v1	S1	S2
A03G213400v1	S3	S2
A03G213900v1	S3	S2
A03G214800v1	S4	S3
A03G214900v1	S3	S4
A03G215100v1	S3	S4
A03G215200v1	S5	S4
A03G215400v1	S4	S3
A03G216100v1	S3	S4
A03G217500v1	S3	S1
A03G218000v1	S2	S3
A03G218300v1	S3	S4
A03G219100v1	S1	S2
A03G219300v1	S3	S4
A03G219400v1	S3	S4
A03G219600v1	S3	S2
A03G220100v1	S2	S3
A03G220500v1	S3	S4
A03G221600v1	S2	S3
A03G221800v1	S4	S3
A03G221900v1	S1	S2
A03G222500v1	S3	S2
A03G223000v1	S2	S3
A03G223900v1	S1	S3
A03G224800v1	S1	S2
A03G225400v1	S1	S2
A03G225900v1	S4	S3
A03G226600v1	S1	S3
A03G226700v1	S1	S3
A03G228000v1	S5	S4
A03G228300v1	S2	S1
A03G228900v1	S4	S3
A03G229900v1	S3	S2
A03G230000v1	S3	S1
A03G230300v1	S5	S6
A03G230500v1	S1	S3
A03G230800v1	S4	S3
A03G231000v1	S3	S4
A03G231100v1	S3	S1
A03G231300v1	S2	S3
A03G231400v1	S3	S4
A03G231800v1	S5	S3
A03G233400v1	S1	S3
A03G234200v1	S3	S5
A03G234900v1	S3	S2
A03G235000v1	S4	S3
A03G235700v1	S3	S5
A03G235800v1	S3	S5
A03G236100v1	S1	S3
A03G236400v1	S3	S2
A03G236600v1	S4	S3
A03G237200v1	S1	S3
A03G237800v1	S1	S3
A03G238000v1	S1	S3
A03G238700v1	S3	S4
A03G239500v1	S3	S4
A03G240700v1	S4	S3
A03G241100v1	S4	S3
A03G241900v1	S3	S4
A03G242000v1	S3	S4
A03G242100v1	S4	S3
A03G242400v1	S4	S3
A03G242800v1	S3	S2
A03G243100v1	S3	S2
A03G243300v1	S2	S4
A03G243400v1	S2	S3
A03G243700v1	S4	S3
A03G243900v1	S1	S2
A03G244600v1	S1	S2
A03G244700v1	S1	S2
A03G244800v1	S1	S3
A03G245000v1	S3	S4
A03G246100v1	S3	S2
A03G246800v1	S3	S2
A03G249000v1	S4	S3
A03G249300v1	S4	S3
A03G249500v1	S3	S4
A03G249600v1	S2	S3
A03G250000v1	S3	S2
A03G250500v1	S2	S3
A03G250700v1	S4	S3
A03G250800v1	S4	S3
A03G251000v1	S2	S3
A03G251100v1	S3	S2
A03G251200v1	S3	S2
A03G251300v1	S4	S2
A03G251400v1	S4	S2
A03G251600v1	S3	S2
A03G251700v1	S3	S4
A03G251800v1	S1	S2
A03G252000v1	S1	S2
A03G253000v1	S3	S6
A03G253200v1	S2	S3
A03G253300v1	S4	S3
A03G253500v1	S6	S3
A03G254900v1	S1	S3
A03G255200v1	S5	S3
A03G255500v1	S5	S1
A03G256000v1	S1	S3
A03G256100v1	S3	S4
A03G256300v1	S3	S4
A03G256400v1	S3	S2
A03G257200v1	S1	S3
A03G257300v1	S1	S2
A03G257600v1	S1	S3
A03G257800v1	S1	S3
A03G258600v1	S4	S3
A03G258800v1	S5	S2
A03G258900v1	S5	S1
A03G259400v1	S4	S3
A03G260100v1	S4	S3
A03G260400v1	S5	S4
A03G260900v1	S3	S4
A03G261900v1	S3	S1
A03G262400v1	S6	S3
A03G262600v1	S3	S1
A03G263100v1	S3	S2
A03G263200v1	S5	S6
A03G263600v1	S5	S2
A04G000300v1	S3	S2
A04G000900v1	S6	S3
A04G001000v1	S6	S3
A04G001100v1	S3	S2
A04G001300v1	S3	S5
A04G002200v1	S2	S3
A04G003000v1	S2	S3
A04G003500v1	S5	S2
A04G003800v1	S6	S2
A04G004100v1	S6	S2
A04G004600v1	S4	S3
A04G004900v1	S4	S3
A04G005100v1	S3	S2
A04G006100v1	S1	S3
A04G006200v1	S2	S3
A04G006600v1	S3	S2
A04G007400v1	S3	S4
A04G007700v1	S4	S3
A04G008100v1	S5	S3
A04G008200v1	S2	S3
A04G008400v1	S1	S3
A04G008700v1	S2	S3
A04G008900v1	S2	S3
A04G009000v1	S1	S2
A04G009300v1	S3	S4
A04G009400v1	S6	S3
A04G009500v1	S2	S3
A04G009900v1	S1	S2
A04G010000v1	S1	S2
A04G010100v1	S1	S3
A04G010200v1	S1	S2
A04G010500v1	S1	S3
A04G010600v1	S1	S2
A04G010700v1	S1	S3
A04G010800v1	S3	S2
A04G011600v1	S1	S2
A04G012000v1	S1	S2
A04G012300v1	S1	S2
A04G012400v1	S1	S2
A04G012800v1	S1	S2
A04G012900v1	S1	S2
A04G013100v1	S1	S2
A04G013200v1	S3	S6
A04G014400v1	S3	S1
A04G014700v1	S3	S2
A04G014900v1	S2	S3
A04G015400v1	S3	S4
A04G015600v1	S2	S3
A04G015700v1	S2	S5
A04G015800v1	S2	S3
A04G015900v1	S3	S2
A04G016100v1	S3	S2
A04G016300v1	S3	S4
A04G017300v1	S5	S3
A04G017600v1	S3	S5
A04G017700v1	S2	S3
A04G017800v1	S5	S4
A04G018500v1	S3	S1
A04G018900v1	S2	S3
A04G019300v1	S2	S3
A04G019400v1	S2	S1
A04G019500v1	S2	S3
A04G020900v1	S2	S3
A04G021500v1	S2	S1
A04G021600v1	S2	S1
A04G021700v1	S2	S3
A04G021800v1	S2	S5
A04G021900v1	S2	S3
A04G022400v1	S3	S1
A04G023400v1	S1	S3
A04G023500v1	S1	S2
A04G023700v1	S1	S2
A04G023800v1	S1	S2
A04G023900v1	S1	S2
A04G024000v1	S1	S2
A04G024900v1	S1	S3
A04G026400v1	S6	S3
A04G028100v1	S4	S3
A04G028200v1	S3	S5
A04G028300v1	S3	S2
A04G028400v1	S3	S1
A04G028600v1	S4	S3
A04G028700v1	S4	S3
A04G028900v1	S4	S3
A04G029200v1	S2	S4
A04G029500v1	S3	S1
A04G029800v1	S1	S3
A04G029900v1	S3	S2
A04G030000v1	S2	S3
A04G030500v1	S5	S1
A04G031200v1	S3	S2
A04G031400v1	S3	S1
A04G031800v1	S5	S4
A04G031900v1	S4	S5
A04G032800v1	S3	S2
A04G033100v1	S4	S5
A04G033200v1	S3	S2
A04G033400v1	S3	S4
A04G033700v1	S2	S3
A04G033800v1	S2	S3
A04G034100v1	S3	S2
A04G034200v1	S1	S2
A04G034600v1	S2	S1
A04G035100v1	S3	S6
A04G035700v1	S3	S4
A04G035900v1	S3	S2
A04G036300v1	S2	S5
A04G036600v1	S3	S2
A04G036700v1	S1	S3
A04G036900v1	S4	S3
A04G037100v1	S5	S1
A04G037200v1	S2	S3
A04G037300v1	S1	S2
A04G037400v1	S2	S1
A04G038100v1	S2	S3
A04G039100v1	S2	S1
A04G039200v1	S2	S1
A04G039400v1	S2	S1
A04G039900v1	S2	S1
A04G040600v1	S5	S1
A04G040800v1	S5	S1
A04G040900v1	S3	S2
A04G041300v1	S5	S3
A04G042000v1	S2	S1
A04G042100v1	S3	S2
A04G042300v1	S2	S3
A04G042500v1	S2	S3
A04G043000v1	S4	S3
A04G043100v1	S1	S3
A04G043500v1	S1	S2
A04G044000v1	S3	S2
A04G044100v1	S2	S1
A04G044200v1	S4	S3
A04G044800v1	S3	S5
A04G046000v1	S3	S4
A04G046100v1	S4	S3
A04G046600v1	S5	S6
A04G046700v1	S6	S3
A04G047200v1	S3	S2
A04G048000v1	S3	S2
A04G048100v1	S6	S2
A04G048400v1	S3	S2
A04G048500v1	S2	S4
A04G048700v1	S3	S2
A04G049000v1	S2	S3
A04G049100v1	S1	S3
A04G049600v1	S2	S3
A04G049700v1	S3	S4
A04G050300v1	S4	S1
A04G050400v1	S3	S5
A04G050600v1	S3	S2
A04G050900v1	S2	S1
A04G052300v1	S5	S4
A04G052500v1	S1	S3
A04G052800v1	S2	S3
A04G053200v1	S5	S6
A04G053400v1	S3	S1
A04G054300v1	S2	S3
A04G054600v1	S3	S4
A04G058300v1	S2	S3
A04G059800v1	S3	S2
A04G060100v1	S3	S1
A04G060200v1	S1	S3
A04G060300v1	S1	S2
A04G060500v1	S1	S2
A04G061800v1	S1	S2
A04G062200v1	S1	S2
A04G063200v1	S2	S5
A04G063300v1	S2	S3
A04G063700v1	S1	S2
A04G064400v1	S1	S5
A04G064700v1	S2	S1
A04G065500v1	S1	S2
A04G066300v1	S2	S3
A04G066400v1	S3	S2
A04G067000v1	S3	S1
A04G067200v1	S4	S3
A04G068200v1	S4	S5
A04G068500v1	S2	S3
A04G070500v1	S4	S3
A04G070700v1	S1	S2
A04G070900v1	S6	S3
A04G071600v1	S2	S3
A04G073400v1	S1	S2
A04G073600v1	S2	S3
A04G074400v1	S3	S4
A04G074800v1	S5	S1
A04G076000v1	S2	S3
A04G076700v1	S3	S2
A04G077200v1	S2	S4
A04G077500v1	S3	S1
A04G077600v1	S5	S2
A04G077700v1	S2	S3
A04G078000v1	S1	S2
A04G079300v1	S2	S3
A04G080100v1	S4	S2
A04G081000v1	S3	S5
A04G081500v1	S2	S5
A04G081600v1	S2	S3
A04G082600v1	S2	S3
A04G082900v1	S3	S2
A04G083000v1	S3	S2
A04G084500v1	S3	S4
A04G084600v1	S2	S3
A04G084700v1	S3	S2
A04G084900v1	S3	S2
A04G085100v1	S1	S5
A04G085400v1	S3	S2
A04G085500v1	S4	S3
A04G087300v1	S2	S3
A04G087600v1	S3	S1
A04G088500v1	S3	S4
A04G088800v1	S4	S2
A04G089000v1	S2	S3
A04G089100v1	S3	S2
A04G090200v1	S4	S3
A04G090300v1	S4	S3
A04G090500v1	S3	S2
A04G090600v1	S3	S2
A04G091200v1	S3	S2
A04G092100v1	S3	S4
A04G093000v1	S3	S2
A04G093300v1	S2	S3
A04G093900v1	S1	S5
A04G094000v1	S2	S3
A04G094100v1	S1	S5
A04G095700v1	S5	S2
A04G095800v1	S6	S2
A04G096000v1	S5	S2
A04G097200v1	S1	S2
A04G097600v1	S6	S3
A04G098400v1	S1	S2
A04G099200v1	S4	S3
A04G099300v1	S3	S2
A04G099400v1	S2	S3
A04G099700v1	S3	S2
A04G100400v1	S3	S4
A04G100700v1	S3	S4
A04G101100v1	S3	S4
A04G102000v1	S2	S3
A04G102500v1	S5	S3
A04G102800v1	S3	S4
A04G103500v1	S4	S3
A04G103600v1	S1	S2
A04G103700v1	S3	S5
A04G104000v1	S2	S6
A04G104100v1	S5	S1
A04G104200v1	S3	S2
A04G104800v1	S4	S1
A04G106500v1	S3	S4
A04G107000v1	S3	S4
A04G107300v1	S3	S2
A04G107400v1	S3	S2
A04G108700v1	S3	S2
A04G108900v1	S1	S4
A04G111200v1	S3	S1
A04G111300v1	S2	S3
A04G111400v1	S3	S4
A04G111700v1	S3	S2
A04G112200v1	S3	S1
A04G112500v1	S5	S6
A04G112800v1	S4	S3
A04G113200v1	S3	S4
A04G113700v1	S2	S3
A04G113900v1	S2	S3
A04G114400v1	S4	S5
A04G114700v1	S2	S3
A04G115000v1	S5	S2
A04G115600v1	S4	S3
A04G115700v1	S2	S4
A04G115900v1	S5	S1
A04G117100v1	S2	S3
A04G117200v1	S2	S3
A04G118200v1	S3	S4
A04G118700v1	S4	S3
A04G118800v1	S2	S4
A04G119100v1	S5	S4
A04G119800v1	S1	S3
A04G120200v1	S3	S4
A04G120900v1	S4	S5
A04G121300v1	S4	S5
A04G121800v1	S3	S4
A04G122000v1	S6	S5
A04G122100v1	S3	S2
A04G122200v1	S5	S2
A04G122300v1	S6	S2
A04G122700v1	S4	S3
A04G123200v1	S2	S3
A04G123300v1	S2	S3
A04G123800v1	S3	S4
A04G123900v1	S1	S3
A04G124600v1	S1	S2
A04G125200v1	S4	S3
A04G125500v1	S3	S4
A04G125900v1	S3	S4
A04G127200v1	S2	S3
A04G127700v1	S3	S2
A04G127800v1	S4	S3
A04G128700v1	S4	S3
A04G129100v1	S3	S2
A04G129300v1	S2	S1
A04G129600v1	S3	S1
A04G129800v1	S3	S2
A04G129900v1	S2	S3
A04G130100v1	S2	S3
A04G130200v1	S2	S3
A04G131500v1	S3	S4
A04G131800v1	S2	S3
A04G132500v1	S1	S4
A04G132800v1	S2	S3
A04G133100v1	S4	S3
A04G133300v1	S3	S2
A04G133400v1	S4	S3
A04G134700v1	S3	S4
A04G134800v1	S3	S4
A04G135000v1	S2	S3
A04G135100v1	S3	S6
A04G135200v1	S4	S3
A04G135400v1	S3	S4
A04G136300v1	S1	S3
A04G137000v1	S4	S3
A04G137600v1	S4	S3
A04G138000v1	S1	S4
A04G138300v1	S1	S2
A04G138500v1	S3	S2
A04G138600v1	S1	S2
A04G138800v1	S4	S3
A04G138900v1	S3	S5
A04G139200v1	S1	S2
A04G139500v1	S4	S3
A04G139700v1	S2	S3
A04G140000v1	S4	S3
A04G140200v1	S3	S2
A04G140600v1	S5	S4
A04G141100v1	S4	S5
A04G141300v1	S2	S3
A04G141400v1	S6	S5
A04G142400v1	S1	S2
A04G142800v1	S5	S1
A04G143100v1	S4	S3
A04G143700v1	S4	S3
A04G144000v1	S2	S3
A04G144100v1	S1	S2
A04G144400v1	S2	S3
A04G144700v1	S2	S3
A04G144900v1	S2	S3
A04G146600v1	S3	S1
A04G148400v1	S2	S3
A04G148700v1	S4	S5
A04G149600v1	S3	S2
A04G149800v1	S1	S3
A04G150400v1	S5	S4
A04G150500v1	S5	S4
A04G150700v1	S4	S5
A04G150800v1	S4	S5
A04G151700v1	S6	S2
A04G151900v1	S4	S3
A04G152200v1	S1	S2
A04G152300v1	S4	S5
A04G154000v1	S4	S3
A04G154400v1	S2	S3
A04G155200v1	S2	S3
A04G155400v1	S2	S3
A04G155900v1	S1	S2
A04G156300v1	S3	S2
A04G156400v1	S2	S3
[truncated: 15,906 more rows]
