# Supplementary material for: Histone Maps in Gossypium darwinii Reveal Epigenetic Regulation Drives Subgenome Divergence and Cotton Domestication
Source: Int J Mol Sci. 2023 Jun 25;24(13):10607. doi: 10.3390/ijms241310607 (PMC10341804; doi:10.3390/ijms241310607)
Supplement: Supplementary file 1 [file ijms-24-10607-s001.zip › Supplementary Table 6.xlsx]

## Sheet: Sheet1
Supplemental Table 6. Differentially expressed genes (DEGs) between the Gh and Gd samples.
Gene	baseMean	log2FoldChange	lfcSE	stat	pvalue	padj	DEGs
A01G000500v1	100.171	10.8654	1.50953	7.19787	6.11613e-13	1.06185e-11	up
A01G000800v1	1986.92	5.9147	0.217846	27.1508	2.47832e-162	5.64296e-159	up
A01G000900v1	66.1824	6.00588	0.661322	9.08162	1.06967e-19	3.64121e-18	up
A01G001000v1	33120.6	6.89499	0.188051	36.6656	2.57965e-294	5.2863e-290	up
A01G001100v1	16778.3	6.79447	0.216525	31.3796	3.84102e-216	1.38903e-212	up
A01G001200v1	431.944	6.3064	0.40238	15.6727	2.32338e-55	5.13794e-53	up
A01G001300v1	31034.7	6.77911	0.20782	32.62	2.13378e-233	1.31178e-229	up
A01G001400v1	81.0265	-2.23292	0.353376	-6.31881	2.63581e-10	3.1997e-09	down
A01G001900v1	178.519	1.51286	0.562008	2.69189	0.00710486	0.0197266	up
A01G002000v1	2.82605	5.72069	1.98992	2.87484	0.0040423	0.0120829	up
A01G002100v1	242.473	1.80871	0.275693	6.56058	5.35984e-11	7.18036e-10	up
A01G002300v1	42.6547	-2.04182	0.421459	-4.84465	1.26836e-06	8.5368e-06	down
A01G003000v1	70.0059	-4.7105	0.51369	-9.16991	4.73407e-20	1.66592e-18	down
A01G003300v1	22.3187	-1.82668	0.559307	-3.26596	0.00109093	0.00384339	down
A01G004000v1	43.8526	1.14907	0.439452	2.61478	0.00892861	0.0240032	up
A01G004600v1	11.0286	2.95296	0.82559	3.57679	0.000347837	0.00139582	up
A01G004900v1	470.261	3.739	0.26889	13.9053	5.88171e-44	8.50799e-42	up
A01G005100v1	62.0324	1.67923	0.399147	4.20706	2.58718e-05	0.000133995	up
A01G005300v1	358.453	1.88635	0.201379	9.36716	7.45082e-21	2.79813e-19	up
A01G005900v1	91.8116	2.54421	0.482418	5.27387	1.33576e-07	1.07148e-06	up
A01G006400v1	7.81391	2.40116	0.868496	2.76474	0.00569683	0.0162857	up
A01G006500v1	118.693	2.68324	0.571505	4.69504	2.66552e-06	1.6946e-05	up
A01G007600v1	9.66843	6.03516	1.72218	3.50437	0.000457681	0.00177868	up
A01G008200v1	67.3848	-1.56287	0.374244	-4.17606	2.96603e-05	0.000151573	down
A01G008500v1	5.28568	-4.45343	1.50994	-2.94941	0.00318385	0.00981465	down
A01G009100v1	225.628	-1.22288	0.224014	-5.45895	4.78962e-08	4.10901e-07	down
A01G009300v1	3.12174	-4.7461	1.80066	-2.63576	0.00839485	0.0227774	down
A01G009700v1	2584.83	-3.27984	0.254259	-12.8996	4.52611e-38	5.06833e-36	down
A01G009900v1	87.6761	-1.16009	0.351799	-3.2976	0.000975154	0.00347816	down
A01G010100v1	50.4448	-8.76069	1.23345	-7.10261	1.22423e-12	2.04961e-11	down
A01G010300v1	1010.78	1.46355	0.252123	5.80493	6.43932e-09	6.35018e-08	up
A01G010500v1	23.7241	2.09294	0.544097	3.84662	0.000119758	0.000536028	up
A01G011200v1	368.205	-1.50255	0.221647	-6.77899	1.21015e-11	1.77304e-10	down
A01G011400v1	562.532	1.15513	0.175312	6.58897	4.42876e-11	6.01695e-10	up
A01G011900v1	3.79013	-5.02632	1.69164	-2.97127	0.00296567	0.00922533	down
A01G012500v1	297.816	1.75599	0.262641	6.68591	2.29491e-11	3.24034e-10	up
A01G012900v1	19.1039	2.4718	0.692914	3.56725	0.000360746	0.00144085	up
A01G013000v1	468.187	2.01507	0.275885	7.30401	2.79309e-13	5.02226e-12	up
A01G013200v1	125.552	1.92884	0.270878	7.12068	1.07394e-12	1.81133e-11	up
A01G013700v1	215.759	-1.48598	0.214507	-6.92743	4.28568e-12	6.6634e-11	down
A01G014000v1	967.064	1.06272	0.149796	7.09447	1.2985e-12	2.16788e-11	up
A01G014300v1	243.712	2.38161	0.286309	8.31834	8.92071e-17	2.33768e-15	up
A01G015200v1	4.28669	3.81155	1.44149	2.64418	0.00818897	0.0223005	up
A01G017000v1	74.066	1.3748	0.353364	3.89059	9.99995e-05	0.000456034	up
A01G017100v1	243.39	1.09124	0.225548	4.83817	1.3104e-06	8.79757e-06	up
A01G018100v1	24.6323	-1.83176	0.678314	-2.70045	0.00692451	0.019279	down
A01G020200v1	317.147	-6.13461	0.40027	-15.3262	5.11256e-53	1.04768e-50	down
A01G020800v1	21.3612	5.16284	0.917531	5.62688	1.83498e-08	1.68971e-07	up
A01G021200v1	13.0603	-1.70959	0.676901	-2.52561	0.0115496	0.0299126	down
A01G021300v1	41.8226	3.43331	0.478701	7.17214	7.38324e-13	1.27123e-11	up
A01G021400v1	14.5063	-2.0842	0.683669	-3.04856	0.00229945	0.00739439	down
A01G021900v1	8.55691	7.31548	1.63318	4.4793	7.48895e-06	4.352e-05	up
A01G022500v1	8.60274	-4.24892	1.29015	-3.29335	0.000990002	0.0035256	down
A01G022800v1	6.04641	6.81319	1.75043	3.89231	9.92955e-05	0.000453319	up
A01G023300v1	83.8583	-1.32651	0.335146	-3.958	7.55809e-05	0.000354396	down
A01G024300v1	268.636	1.54623	0.264708	5.84128	5.18011e-09	5.17397e-08	up
A01G024600v1	183.8	-1.0512	0.235953	-4.45513	8.38426e-06	4.82576e-05	down
A01G024900v1	36.9186	-2.38801	0.452733	-5.27465	1.33012e-07	1.06724e-06	down
A01G025000v1	45.5088	1.54485	0.380924	4.05554	5.00179e-05	0.000243406	up
A01G025200v1	2.56075	5.57222	2.19225	2.54179	0.0110288	0.0287515	up
A01G025300v1	59.9576	-1.28277	0.425869	-3.01213	0.00259425	0.00820488	down
A01G025600v1	283.785	1.07573	0.212188	5.06972	3.98396e-07	2.9413e-06	up
A01G025700v1	4.47664	6.37867	1.94956	3.27185	0.00106846	0.00377211	up
A01G025900v1	65.9531	1.0057	0.34119	2.94762	0.00320229	0.00986655	up
A01G026300v1	730.09	1.79899	0.407113	4.4189	9.92052e-06	5.61691e-05	up
A01G026400v1	13.4378	3.87338	1.08023	3.58569	0.000336193	0.00135546	up
A01G026500v1	7268.19	3.01863	0.221057	13.6554	1.87337e-42	2.54798e-40	up
A01G026600v1	268.215	1.96153	0.205195	9.55939	1.18458e-21	4.77225e-20	up
A01G028800v1	24.6869	-1.26411	0.493118	-2.5635	0.0103622	0.0272751	down
A01G028900v1	443.452	-1.06815	0.18266	-5.84771	4.98384e-09	4.99091e-08	down
A01G029000v1	314.277	1.06161	0.262204	4.04878	5.14861e-05	0.000249972	up
A01G029300v1	89.8393	-3.41358	0.385402	-8.85719	8.20551e-19	2.60026e-17	down
A01G029600v1	26.1578	1.37378	0.494641	2.77733	0.00548077	0.0157618	up
A01G029700v1	22.0224	-1.24965	0.520007	-2.40314	0.0162548	0.0400103	down
A01G030000v1	4.76304	-5.35594	1.59569	-3.35649	0.000789374	0.0028843	down
A01G030500v1	17.8764	-1.68004	0.604986	-2.77699	0.00548642	0.0157744	down
A01G031800v1	111.229	-1.36169	0.402465	-3.38338	0.000715992	0.00264553	down
A01G032000v1	199.502	2.01711	0.33217	6.07253	1.25913e-09	1.38376e-08	up
A01G032400v1	295.603	1.91437	0.196221	9.75619	1.73558e-22	7.38906e-21	up
A01G032600v1	97.7602	1.15173	0.264025	4.36219	1.28766e-05	7.11118e-05	up
A01G032800v1	11.5289	3.03038	0.934087	3.24422	0.00117773	0.00411288	up
A01G033400v1	47.2227	1.6912	0.525016	3.22123	0.00127642	0.0044154	up
A01G033500v1	12.7202	6.43441	1.56259	4.11779	3.82531e-05	0.000190775	up
A01G033800v1	159.627	2.29129	0.25727	8.90616	5.28319e-19	1.69872e-17	up
A01G034100v1	148.652	-2.01138	0.40771	-4.93336	8.0825e-07	5.65159e-06	down
A01G034700v1	24.0949	3.4809	0.611247	5.69474	1.23557e-08	1.16878e-07	up
A01G035200v1	5.88295	4.27849	1.35745	3.15187	0.0016223	0.00545265	up
A01G035300v1	71.389	-1.44442	0.387823	-3.72444	0.000195749	0.000834423	down
A01G035500v1	43.6792	1.95106	0.607498	3.21163	0.00131986	0.00454471	up
A01G036000v1	101.064	-6.29114	0.660418	-9.52599	1.6347e-21	6.50041e-20	down
A01G036300v1	12.464	5.39114	1.23014	4.38254	1.17303e-05	6.53326e-05	up
A01G036600v1	7.55423	7.13794	1.73466	4.1149	3.87349e-05	0.000192912	up
A01G036700v1	11.3514	7.72518	1.59144	4.85422	1.20864e-06	8.16163e-06	up
A01G037000v1	567.926	2.12977	0.322119	6.61175	3.79803e-11	5.20373e-10	up
A01G037400v1	9.26103	-2.54473	1.07566	-2.36575	0.0179937	0.0436404	down
A01G037900v1	8.81712	2.60224	0.947719	2.74579	0.00603646	0.0171102	up
A01G038100v1	1506.33	1.0032	0.148777	6.74297	1.55176e-11	2.24043e-10	up
A01G039400v1	19.2468	-7.3706	1.2963	-5.68588	1.3014e-08	1.22765e-07	down
A01G039600v1	4284.93	1.38642	0.144509	9.59396	8.47647e-22	3.44648e-20	up
A01G039700v1	200.45	-1.86328	0.359693	-5.1802	2.21648e-07	1.71249e-06	down
A01G039900v1	16940.1	2.24734	0.271653	8.27285	1.30797e-16	3.36726e-15	up
A01G040000v1	280.925	-2.78312	0.221729	-12.5519	3.88167e-36	3.96401e-34	down
A01G040100v1	7121.36	2.28642	0.203159	11.2544	2.20399e-29	1.52756e-27	up
A01G040200v1	60.3203	3.02221	0.448893	6.73258	1.6668e-11	2.39415e-10	up
A01G040900v1	146.191	-1.10581	0.266685	-4.14651	3.37587e-05	0.000170491	down
A01G041000v1	785.539	1.22696	0.214753	5.71335	1.10774e-08	1.05451e-07	up
A01G041300v1	76.4899	4.82685	0.650449	7.4208	1.16416e-13	2.17007e-12	up
A01G041400v1	132.424	1.89548	0.270977	6.995	2.65264e-12	4.24126e-11	up
A01G042000v1	11.9766	7.80269	1.58552	4.92122	8.60059e-07	5.97714e-06	up
A01G042200v1	24.1011	3.7124	0.800044	4.64025	3.47995e-06	2.16294e-05	up
A01G042300v1	58.0266	2.23889	0.40116	5.58104	2.39084e-08	2.15737e-07	up
A01G042400v1	19.6019	2.1055	0.69273	3.03942	0.00237032	0.00759237	up
A01G042600v1	11.0715	3.34695	0.847733	3.94812	7.87669e-05	0.000367876	up
A01G042700v1	6.70635	5.5048	1.75695	3.13315	0.00172943	0.00576804	up
A01G042900v1	32.0394	1.60964	0.450448	3.57343	0.000352342	0.00141169	up
A01G043000v1	28.0225	-6.93493	1.28978	-5.37684	7.58034e-08	6.32831e-07	down
A01G044600v1	1332.25	7.36988	0.328533	22.4327	1.88805e-111	1.87212e-108	up
A01G044900v1	86.6405	5.00914	0.532252	9.41121	4.9048e-21	1.86823e-19	up
A01G045100v1	42.5853	4.56175	0.556969	8.19031	2.6056e-16	6.55418e-15	up
A01G045200v1	55.489	-2.16619	0.375186	-5.77363	7.75813e-09	7.56458e-08	down
A01G046000v1	69.6501	-1.7468	0.350786	-4.97969	6.36856e-07	4.54252e-06	down
A01G047000v1	28.5315	-1.74541	0.519116	-3.36227	0.000773043	0.00283234	down
A01G047100v1	42.2274	-4.55808	0.641903	-7.10089	1.23957e-12	2.07417e-11	down
A01G047200v1	135.65	-3.40743	0.357239	-9.53823	1.45284e-21	5.8073e-20	down
A01G047400v1	463.344	1.99443	0.21503	9.27515	1.77376e-20	6.4524e-19	up
A01G047800v1	37.0199	-2.9478	0.566296	-5.2054	1.93578e-07	1.51061e-06	down
A01G048200v1	688.316	1.38231	0.178073	7.7626	8.32032e-15	1.78648e-13	up
A01G048400v1	1005.97	1.16683	0.182652	6.38824	1.67807e-10	2.09467e-09	up
A01G048600v1	9.15658	-6.29868	1.41101	-4.46396	8.04598e-06	4.64584e-05	down
A01G048800v1	8.79564	7.3583	1.66536	4.41844	9.94149e-06	5.62722e-05	up
A01G048900v1	41.0793	2.62992	0.624471	4.21143	2.53755e-05	0.000131558	up
A01G049400v1	53.6716	-1.13743	0.372168	-3.05622	0.00224149	0.00723208	down
A01G050100v1	134.547	-3.22351	0.386854	-8.33263	7.90674e-17	2.08083e-15	down
A01G050500v1	100.856	-1.37311	0.342357	-4.01075	6.05272e-05	0.000289913	down
A01G050700v1	73.4211	3.53131	0.441062	8.00638	1.18135e-15	2.78152e-14	up
A01G050800v1	21.9749	2.29766	0.604715	3.79957	0.000144946	0.000636717	up
A01G051000v1	581.494	-4.86768	0.252242	-19.2977	5.61897e-83	2.71998e-80	down
A01G051100v1	280.379	-2.30535	0.306782	-7.51461	5.70798e-14	1.10349e-12	down
A01G051300v1	27.2219	1.14354	0.490937	2.3293	0.0198429	0.0474134	up
A01G052900v1	7.92292	7.20446	1.6568	4.34842	1.37119e-05	7.53053e-05	up
A01G053000v1	11.9757	7.80256	1.59112	4.90382	9.39925e-07	6.47655e-06	up
A01G053200v1	37.7986	1.62465	0.431576	3.76446	0.000166909	0.000723221	up
A01G053400v1	165.6	-2.54667	0.25781	-9.87811	5.18019e-23	2.31105e-21	down
A01G054200v1	4.86536	5.03041	1.77918	2.82738	0.00469312	0.0137606	up
A01G054400v1	15.2551	2.45535	0.629861	3.89824	9.68955e-05	0.000443121	up
A01G055000v1	23.0677	8.74734	1.51981	5.75555	8.63611e-09	8.36624e-08	up
A01G055300v1	131.349	-1.42564	0.266887	-5.34173	9.20615e-08	7.59483e-07	down
A01G055500v1	44.2492	1.39499	0.400838	3.48018	0.000501074	0.00192613	up
A01G055800v1	60.5452	1.4539	0.333506	4.35946	1.30386e-05	7.18769e-05	up
A01G055900v1	8.51482	-2.37832	0.965799	-2.46255	0.0137955	0.0347598	down
A01G056200v1	17.8715	-3.18919	0.720932	-4.4237	9.70248e-06	5.5041e-05	down
A01G056400v1	193.963	1.06438	0.211276	5.03786	4.70753e-07	3.43359e-06	up
A01G056800v1	8.80252	7.35922	1.65882	4.43643	9.14649e-06	5.21855e-05	up
A01G056900v1	10.68	7.63827	1.63785	4.6636	3.1073e-06	1.94826e-05	up
A01G057200v1	64.8384	1.72272	0.349983	4.92229	8.55389e-07	5.94671e-06	up
A01G057400v1	106.589	-1.02819	0.290546	-3.5388	0.000401943	0.0015848	down
A01G057700v1	253.393	-1.48378	0.206555	-7.18346	6.79674e-13	1.17504e-11	down
A01G058000v1	134.663	-1.31227	0.313542	-4.1853	2.84789e-05	0.00014618	down
A01G059400v1	1.90308	5.1464	2.1853	2.35501	0.0185222	0.0447177	up
A01G059600v1	4.74978	6.46658	1.76207	3.66988	0.000242665	0.00101175	up
A01G059800v1	155.399	1.01063	0.272936	3.70279	0.000213245	0.000902619	up
A01G060000v1	11.1117	7.69186	1.60722	4.78582	1.70294e-06	1.12162e-05	up
A01G060200v1	2572.62	2.4893	0.154457	16.1164	1.95525e-58	4.75111e-56	up
A01G060400v1	10.9896	7.67956	1.63976	4.68333	2.82246e-06	1.78496e-05	up
A01G061100v1	341.325	2.38769	0.246415	9.68971	3.33463e-22	1.39363e-20	up
A01G061300v1	103.12	2.67399	0.33995	7.86582	3.66702e-15	8.19772e-14	up
A01G062100v1	267.521	-1.80161	0.231336	-7.78786	6.81556e-15	1.48057e-13	down
A01G062200v1	478.936	1.02768	0.185319	5.54549	2.93139e-08	2.608e-07	up
A01G063200v1	35.3083	-1.2094	0.447439	-2.70294	0.00687295	0.0191588	down
A01G063300v1	197.167	1.91863	0.246983	7.76827	7.95666e-15	1.71332e-13	up
A01G063600v1	20.2128	2.42037	0.572854	4.2251	2.3883e-05	0.000124777	up
A01G063700v1	3.82489	6.15241	1.99524	3.08355	0.00204547	0.00668524	up
A01G064200v1	132.528	-1.20072	0.325476	-3.68913	0.000225022	0.000946799	down
A01G064400v1	88.0154	-1.17639	0.301137	-3.90648	9.36493e-05	0.00042984	down
A01G064700v1	9.02994	2.639	0.916777	2.87856	0.00399491	0.0119622	up
A01G064900v1	107.888	2.58063	0.302559	8.52936	1.47153e-17	4.16699e-16	up
A01G065900v1	251.926	1.62086	0.252688	6.41447	1.41312e-10	1.78058e-09	up
A01G066000v1	51.286	-1.423	0.410484	-3.46664	0.00052701	0.00201386	down
A01G066600v1	94.8549	-1.61014	0.29434	-5.47033	4.49198e-08	3.87421e-07	down
A01G067200v1	66.0803	1.52307	0.640936	2.37632	0.0174864	0.0425679	up
A01G067500v1	281.381	-1.68802	0.219914	-7.67584	1.64333e-14	3.40157e-13	down
A01G068100v1	21.2712	-7.51461	1.30662	-5.75118	8.86252e-09	8.56804e-08	down
A01G068200v1	12.7465	-6.776	1.34728	-5.02939	4.92033e-07	3.57761e-06	down
A01G069100v1	46.7992	-1.77705	0.419817	-4.23291	2.30689e-05	0.000120812	down
A01G069900v1	285.304	1.97976	0.192499	10.2846	8.27253e-25	4.22752e-23	up
A01G070800v1	10.0951	7.55567	1.64355	4.59717	4.28272e-06	2.61822e-05	up
A01G070900v1	14.0687	3.01528	0.721428	4.17959	2.92031e-05	0.000149535	up
A01G071000v1	38.2444	-1.39682	0.484295	-2.88424	0.00392359	0.011771	down
A01G071100v1	10.4955	7.60945	1.68257	4.52251	6.11108e-06	3.61937e-05	up
A01G071300v1	24.4372	-1.32302	0.505627	-2.61659	0.00888118	0.0238924	down
A01G071400v1	4.85159	5.02683	1.72559	2.91312	0.00357842	0.0108632	up
A01G071600v1	2.62826	-4.49804	1.88317	-2.38854	0.0169153	0.04139	down
A01G072100v1	234.527	5.12666	0.471156	10.881	1.41973e-27	8.72807e-26	up
A01G072300v1	162.544	1.10945	0.241365	4.59657	4.29504e-06	2.62367e-05	up
A01G072800v1	114.002	1.58097	0.331024	4.77599	1.78825e-06	1.17328e-05	up
A01G072900v1	416.595	2.14619	0.239898	8.94627	3.67703e-19	1.19922e-17	up
A01G073100v1	8.63687	2.24208	0.856771	2.61689	0.0088734	0.0238735	up
A01G073400v1	72.8039	7.96223	1.13749	6.99979	2.56339e-12	4.11568e-11	up
A01G074200v1	6.33635	6.88214	1.68828	4.07643	4.57329e-05	0.000224437	up
A01G074400v1	3.69425	-4.98932	1.70249	-2.93061	0.00338295	0.0103524	down
A01G074700v1	405.26	1.83302	0.310416	5.90504	3.52569e-09	3.62638e-08	up
A01G075300v1	136.474	3.45953	0.345283	10.0194	1.25249e-23	5.92304e-22	up
A01G075800v1	149.559	2.48421	0.443873	5.59666	2.18516e-08	1.98636e-07	up
A01G076400v1	599.088	1.45338	0.328712	4.42143	9.80487e-06	5.55603e-05	up
A01G076500v1	2084.33	-1.74227	0.167826	-10.3814	3.01344e-25	1.56865e-23	down
A01G076600v1	1906.66	1.80211	0.226695	7.94947	1.87304e-15	4.3224e-14	up
A01G076700v1	160.138	1.73551	0.430972	4.02696	5.65028e-05	0.000272334	up
A01G077100v1	44.8544	-1.03547	0.380644	-2.72031	0.00652208	0.0183061	down
A01G077700v1	227.636	1.70482	0.479094	3.55843	0.000373084	0.00148492	up
A01G077800v1	56.592	-2.95243	0.449781	-6.56415	5.23292e-11	7.02411e-10	down
A01G077900v1	11.678	-2.43519	0.897785	-2.71244	0.00667898	0.0186918	down
A01G078000v1	138.34	1.56493	0.307217	5.09391	3.50757e-07	2.61503e-06	up
A01G078200v1	6.08257	3.28581	1.14631	2.86642	0.00415147	0.0123701	up
A01G078900v1	818.704	2.73021	0.198799	13.7335	6.39577e-43	8.87568e-41	up
A01G079300v1	54.9317	2.84661	0.403871	7.04832	1.81092e-12	2.97038e-11	up
A01G079600v1	53.8176	4.0757	0.491893	8.28574	1.17374e-16	3.04208e-15	up
A01G079900v1	66.8262	4.33251	0.446928	9.69399	3.19798e-22	1.34108e-20	up
A01G080300v1	65.6961	-1.02875	0.325519	-3.16035	0.00157582	0.00531254	down
A01G080400v1	44.2154	-1.17222	0.438581	-2.67276	0.00752311	0.0207268	down
A01G080600v1	102.942	-1.03178	0.362392	-2.84715	0.00441128	0.0130356	down
A01G081600v1	9.14509	4.33581	1.10275	3.93182	8.4304e-05	0.000390974	up
A01G082100v1	104.546	-2.09986	0.345306	-6.08115	1.19325e-09	1.31583e-08	down
A01G083400v1	14.3397	-6.94572	1.34781	-5.15334	2.55881e-07	1.95535e-06	down
A01G083500v1	48.1669	1.51671	0.460681	3.29231	0.000993671	0.00353743	up
A01G083700v1	1221.27	1.31114	0.212888	6.15881	7.32932e-10	8.33027e-09	up
A01G083900v1	380.117	-1.43481	0.253133	-5.6682	1.44307e-08	1.35114e-07	down
A01G084000v1	82.1799	-2.14981	0.660177	-3.25641	0.00112829	0.0039605	down
A01G084200v1	59.7963	-1.09069	0.369357	-2.95296	0.00314744	0.00972239	down
A01G084500v1	5.38919	-3.5015	1.35194	-2.58998	0.00959817	0.0255175	down
A01G084600v1	13.2383	-5.83342	1.33615	-4.36585	1.26632e-05	7.0075e-05	down
A01G085600v1	8.20605	2.32064	0.960057	2.41719	0.0156408	0.0387283	up
A01G085800v1	114.593	1.56043	0.27724	5.62844	1.81843e-08	1.67579e-07	up
A01G086000v1	28.4218	-2.2035	0.548169	-4.01974	5.82627e-05	0.000280114	down
A01G086600v1	5.66588	6.72335	1.72747	3.89203	9.94088e-05	0.000453701	up
A01G086800v1	8.54906	7.31451	1.63492	4.47394	7.67912e-06	4.45283e-05	up
A01G087000v1	31.8363	1.21197	0.463323	2.61583	0.00890119	0.0239389	up
A01G087900v1	387.454	6.9121	1.0708	6.45509	1.08155e-10	1.3858e-09	up
A01G088000v1	200.684	1.49499	0.225334	6.63455	3.25501e-11	4.50289e-10	up
A01G088200v1	88.0757	-1.37751	0.314242	-4.38359	1.16739e-05	6.50661e-05	down
A01G088500v1	17.9495	1.36183	0.553104	2.46216	0.0138103	0.0347886	up
A01G088700v1	199.079	1.16412	0.24279	4.79476	1.62873e-06	1.07597e-05	up
A01G089000v1	122.179	-1.25939	0.263122	-4.78635	1.69841e-06	1.11887e-05	down
A01G089300v1	683.001	1.52547	0.230381	6.6215	3.55568e-11	4.8924e-10	up
A01G089700v1	11.6874	4.70841	1.11768	4.21268	2.52358e-05	0.000130933	up
A01G090400v1	123.068	3.15782	0.480416	6.57309	4.92804e-11	6.6366e-10	up
A01G090600v1	67.7354	-2.66637	0.372396	-7.16006	8.06445e-13	1.3837e-11	down
A01G090700v1	300.146	2.18697	0.480136	4.5549	5.24113e-06	3.14258e-05	up
A01G090800v1	62.3355	1.02056	0.402456	2.53583	0.0112181	0.0291609	up
A01G092000v1	95.2692	-1.43442	0.37376	-3.8378	0.00012414	0.000553708	down
A01G092700v1	14.2854	1.9976	0.81241	2.45886	0.0139379	0.0350511	up
A01G092900v1	6.19666	4.36258	1.31323	3.32201	0.000893701	0.00321769	up
A01G093000v1	183.675	1.3953	0.225346	6.19183	5.947e-10	6.85422e-09	up
A01G093100v1	34.931	1.4627	0.404332	3.61757	0.00029738	0.00121435	up
A01G093200v1	116.359	5.44987	0.494189	11.0279	2.80362e-28	1.80669e-26	up
A01G094900v1	28.9234	5.28224	0.775245	6.81364	9.51597e-12	1.41547e-10	up
A01G095100v1	197.499	1.84249	0.253258	7.27517	3.4598e-13	6.16517e-12	up
A01G095800v1	203.274	1.87751	0.234964	7.99062	1.34265e-15	3.14566e-14	up
A01G096000v1	18.9879	1.5567	0.580835	2.68012	0.00735968	0.0203308	up
A01G096300v1	23.8661	4.13391	0.706247	5.85335	4.81776e-09	4.84273e-08	up
A01G096400v1	134.199	4.63878	0.371328	12.4924	8.21139e-36	8.2756e-34	up
A01G096700v1	82.2577	-1.65109	0.333874	-4.94526	7.60438e-07	5.34524e-06	down
A01G097100v1	17.2158	1.65168	0.582356	2.8362	0.00456535	0.0134328	up
A01G097300v1	30.9339	1.06227	0.444707	2.3887	0.0169083	0.0413753	up
A01G097400v1	73.4551	-1.24959	0.340277	-3.67226	0.000240412	0.00100386	down
A01G097600v1	3.76279	6.1338	1.94699	3.15041	0.00163044	0.00547491	up
A01G097800v1	221.503	-1.44612	0.221326	-6.53388	6.40879e-11	8.48209e-10	down
A01G098100v1	147.227	-3.88421	0.336692	-11.5364	8.64967e-31	6.50068e-29	down
A01G098500v1	981.498	2.43467	0.226845	10.7328	7.1418e-27	4.238e-25	up
A01G099000v1	166.064	1.68566	0.366902	4.59431	4.34193e-06	2.64968e-05	up
A01G099500v1	266.444	1.023	0.204232	5.00901	5.471e-07	3.93934e-06	up
A01G099800v1	56.1757	1.55074	0.362685	4.27571	1.90529e-05	0.000101597	up
A01G099900v1	106.965	-2.07882	0.513101	-4.05149	5.08926e-05	0.000247349	down
A01G100300v1	46.7596	-1.51144	0.373066	-4.05141	5.09104e-05	0.000247416	down
A01G100400v1	56.5109	2.12078	0.386663	5.48484	4.13848e-08	3.58491e-07	up
A01G101000v1	1252.11	1.37748	0.254965	5.40262	6.56748e-08	5.52551e-07	up
A01G101100v1	17.5031	-3.3719	0.800145	-4.21411	2.50761e-05	0.000130225	down
A01G101400v1	111.887	1.24773	0.26204	4.7616	1.92062e-06	1.25144e-05	up
A01G101500v1	32.314	-3.78981	0.630687	-6.00903	1.86642e-09	2.00283e-08	down
A01G101800v1	147.409	-1.50155	0.310863	-4.83024	1.36366e-06	9.13518e-06	down
A01G102000v1	2.2324	5.37477	2.13429	2.51829	0.0117925	0.0304341	up
A01G102600v1	259.251	1.52674	0.313484	4.87023	1.11467e-06	7.57619e-06	up
A01G103500v1	1798.95	1.76794	0.304464	5.80672	6.37074e-09	6.28457e-08	up
A01G103600v1	101.05	-2.36999	0.315331	-7.51586	5.65367e-14	1.09368e-12	down
A01G103900v1	33.3425	1.54058	0.441825	3.48686	0.000488729	0.00188527	up
A01G104200v1	46.1322	3.25134	0.460375	7.06237	1.63683e-12	2.7014e-11	up
A01G104300v1	405.498	1.13748	0.190038	5.98557	2.15638e-09	2.28841e-08	up
A01G104500v1	16.3518	1.86471	0.688251	2.70935	0.00674158	0.0188413	up
A01G105000v1	3157.01	2.27455	0.156282	14.5541	5.50212e-48	9.52828e-46	up
A01G105100v1	77.5603	2.62513	0.42516	6.17446	6.6389e-10	7.59548e-09	up
A01G105800v1	11.3651	-2.39179	0.839787	-2.84809	0.00439819	0.0130057	down
A01G106000v1	18.372	8.41807	1.53922	5.46904	4.52491e-08	3.90152e-07	up
A01G106200v1	41.0306	-2.02104	0.471479	-4.2866	1.81425e-05	9.71982e-05	down
A01G107800v1	2117.78	1.09312	0.216629	5.04605	4.51032e-07	3.30293e-06	up
A01G107900v1	20748	2.62544	0.198089	13.2539	4.28502e-40	5.26861e-38	up
A01G108300v1	18.6892	-2.40324	0.725842	-3.31097	0.00092974	0.00333417	down
A01G108400v1	60.7083	2.57555	0.487368	5.28462	1.25968e-07	1.01483e-06	up
A01G108700v1	30.1731	-1.50129	0.480799	-3.12249	0.00179327	0.00595306	down
A01G108800v1	129.454	1.77667	0.266467	6.66751	2.60171e-11	3.64673e-10	up
A01G109000v1	96.9897	3.20896	0.38257	8.38791	4.94862e-17	1.33141e-15	up
A01G109300v1	97.9996	-1.13455	0.299808	-3.78425	0.000154172	0.000673155	down
A01G110000v1	40.9537	8.12918	1.49579	5.43472	5.4883e-08	4.66857e-07	up
A01G110300v1	45.1665	2.31296	0.498185	4.64277	3.43762e-06	2.13879e-05	up
A01G111300v1	503.79	-1.47646	0.174093	-8.48084	2.23577e-17	6.2505e-16	down
A01G111400v1	309.41	-1.36781	0.199808	-6.8456	7.61584e-12	1.14783e-10	down
A01G111600v1	1085.04	1.49692	0.163095	9.17822	4.38283e-20	1.54497e-18	up
A01G112000v1	656.16	1.06081	0.29404	3.60771	0.000308909	0.00125625	up
A01G112600v1	206.794	-1.73915	0.331406	-5.24779	1.53938e-07	1.2208e-06	down
A01G112800v1	193.953	-1.00169	0.285305	-3.51094	0.000446521	0.00174014	down
A01G112900v1	8.25881	-3.0525	1.01178	-3.01694	0.00255336	0.00809724	down
A01G113700v1	9614.85	4.54547	0.285861	15.901	6.23749e-57	1.4636e-54	up
A01G113900v1	35.6044	9.37431	1.51294	6.19611	5.78773e-10	6.69071e-09	up
A01G115000v1	53.5057	-4.04889	0.5924	-6.83473	8.21598e-12	1.23284e-10	down
A01G115400v1	92.4094	-3.50637	0.397478	-8.82157	1.12871e-18	3.53307e-17	down
A01G116000v1	147.682	-1.20772	0.242144	-4.98762	6.11292e-07	4.3693e-06	down
A01G116100v1	2133	1.77972	0.246086	7.23208	4.75648e-13	8.34277e-12	up
A01G117800v1	404.104	1.65221	0.342417	4.82512	1.39916e-06	9.35874e-06	up
A01G118300v1	6480.9	2.85041	0.188917	15.0881	1.93918e-51	3.73714e-49	up
A01G118900v1	44.519	-1.01693	0.373448	-2.72308	0.00646763	0.0181732	down
A01G119000v1	168.013	3.34097	0.350809	9.52362	1.67254e-21	6.63374e-20	up
A01G119800v1	125.93	-1.46131	0.326508	-4.47555	7.62131e-06	4.4239e-05	down
A01G120000v1	533.511	1.53016	0.267589	5.71831	1.07592e-08	1.02629e-07	up
A01G121200v1	43.0046	9.64571	1.48853	6.48004	9.17012e-11	1.18535e-09	up
A01G122500v1	240.256	-1.78399	0.257279	-6.93407	4.08897e-12	6.38176e-11	down
A01G122800v1	136.495	-1.15484	0.256885	-4.49555	6.93914e-06	4.06516e-05	down
A01G122900v1	325.984	2.35776	0.231005	10.2065	1.85371e-24	9.25758e-23	up
A01G124100v1	15.0109	-7.01177	1.33352	-5.25811	1.45545e-07	1.16037e-06	down
A01G124200v1	8.4601	-6.1847	1.42402	-4.34312	1.40475e-05	7.69757e-05	down
A01G124300v1	81.9723	-9.46101	1.2188	-7.76257	8.32261e-15	1.78648e-13	down
A01G124500v1	4.07779	-5.13194	1.66426	-3.08361	0.00204503	0.00668451	down
A01G125700v1	134.211	1.09858	0.248927	4.41325	1.01828e-05	5.75218e-05	up
A01G126400v1	88.0627	1.6306	0.321312	5.07483	3.87841e-07	2.8682e-06	up
A01G126800v1	2371.01	1.46776	0.162882	9.01115	2.039e-19	6.77944e-18	up
A01G127000v1	86.799	-1.81697	0.30763	-5.90634	3.49794e-09	3.59965e-08	down
A01G127300v1	69.8717	-1.40711	0.359933	-3.90937	9.25357e-05	0.0004253	down
A01G127400v1	27.6407	-1.10124	0.472731	-2.32952	0.0198313	0.0473946	down
A01G127700v1	367.504	2.80854	0.256446	10.9518	6.51611e-28	4.08766e-26	up
A01G127900v1	144.566	2.7383	0.45908	5.96476	2.44998e-09	2.5773e-08	up
A01G128000v1	22.2884	3.15197	0.753134	4.18513	2.85e-05	0.000146264	up
A01G128300v1	225.842	-2.0904	0.228255	-9.15817	5.27833e-20	1.84477e-18	down
A01G129000v1	539.406	1.77391	0.177949	9.96865	2.09059e-23	9.70717e-22	up
A01G129400v1	58.1951	-2.28076	0.72529	-3.14461	0.00166308	0.00557071	down
A01G131200v1	73.017	-1.36988	0.332612	-4.11855	3.81272e-05	0.000190194	down
A01G131400v1	155.909	1.70703	0.497712	3.42976	0.000604124	0.00227474	up
A01G131600v1	817.993	-1.03787	0.230501	-4.50266	6.71076e-06	3.94226e-05	down
A01G132100v1	72.4096	-1.03046	0.307646	-3.34949	0.0008096	0.00294717	down
A01G132400v1	50.0939	-1.49116	0.398746	-3.73962	0.0001843	0.00079031	down
A01G132900v1	723.932	1.02187	0.218148	4.68432	2.80894e-06	1.77751e-05	up
A01G133100v1	31.4076	1.99879	0.560609	3.5654	0.000363306	0.00144985	up
A01G133300v1	19.3481	8.49247	1.55606	5.45766	4.82441e-08	4.13712e-07	up
A01G134400v1	28.7987	-2.22881	0.554589	-4.01885	5.84839e-05	0.000281002	down
A01G135800v1	229.184	2.99499	0.327206	9.15321	5.52643e-20	1.9282e-18	up
A01G137400v1	74.508	-1.28499	0.331174	-3.88009	0.000104418	0.000474202	down
A01G137600v1	44.704	1.54838	0.425099	3.6424	0.000270111	0.00111372	up
A01G138000v1	251.413	1.03992	0.369154	2.81705	0.00484672	0.0141603	up
A01G138100v1	141.255	-1.24152	0.285719	-4.34526	1.3911e-05	7.63239e-05	down
A01G138300v1	5.19587	-3.43601	1.43988	-2.38632	0.0170179	0.0415939	down
A01G139500v1	7.02461	-5.91617	1.48852	-3.97453	7.05189e-05	0.000332844	down
A01G139700v1	203.763	2.77384	0.241059	11.5069	1.21811e-30	9.05514e-29	up
A01G139800v1	9.05227	-6.28222	1.40998	-4.45553	8.36862e-06	4.81811e-05	down
A01G140000v1	138.267	-1.20395	0.297283	-4.04985	5.12496e-05	0.000248967	down
A01G140200v1	12.2049	-6.71311	1.38423	-4.84969	1.23655e-06	8.33634e-06	down
A01G140500v1	162.411	2.26497	0.2894	7.82642	5.01957e-15	1.10486e-13	up
A01G141000v1	2.54107	5.56366	2.37701	2.34061	0.0192522	0.0462006	up
A01G141100v1	13.7302	4.50953	0.963752	4.67914	2.88078e-06	1.81792e-05	up
A01G142100v1	57.8863	-1.01105	0.343584	-2.94266	0.00325403	0.0100054	down
A01G142500v1	7.83219	3.05079	0.980261	3.11223	0.00185682	0.00613852	up
A01G143200v1	110.317	-3.65675	0.379355	-9.6394	5.45076e-22	2.24596e-20	down
A01G144000v1	10.4491	7.60411	1.61554	4.70685	2.51572e-06	1.60585e-05	up
A01G144200v1	900.163	1.80198	0.187584	9.60628	7.52157e-22	3.07041e-20	up
A01G144700v1	81.259	-9.44843	1.21776	-7.75883	8.57173e-15	1.83739e-13	down
A01G145300v1	77.3622	1.24517	0.447523	2.78237	0.00539635	0.0155438	up
A01G145600v1	27.4393	1.3682	0.458238	2.98578	0.00282854	0.00884532	up
A01G145900v1	200.177	-1.1076	0.216043	-5.12674	2.94806e-07	2.22815e-06	down
A01G146100v1	32.2438	-1.15594	0.431078	-2.68151	0.00732918	0.0202561	down
A01G146500v1	149.08	11.4389	1.54243	7.41616	1.20564e-13	2.24195e-12	up
A01G147000v1	57.3684	-1.04826	0.417038	-2.51358	0.0119512	0.0307725	down
A01G147100v1	599.135	1.78861	0.218376	8.1905	2.60149e-16	6.54652e-15	up
A01G147900v1	91.7537	1.63962	0.383387	4.27668	1.897e-05	0.000101182	up
A01G149100v1	344.234	1.1389	0.215503	5.28483	1.25819e-07	1.01376e-06	up
A01G150200v1	44.6907	2.51485	0.436485	5.7616	8.33218e-09	8.08839e-08	up
A01G150300v1	47.0091	1.9537	0.366669	5.32824	9.91673e-08	8.14388e-07	up
A01G150400v1	157.348	1.15514	0.234211	4.93204	8.13764e-07	5.68497e-06	up
A01G150500v1	40.8464	1.54367	0.400745	3.85199	0.000117163	0.000525726	up
A01G150600v1	100.625	2.41657	0.321089	7.52617	5.22492e-14	1.01649e-12	up
A01G151500v1	16.1722	-1.9864	0.71132	-2.79256	0.00522929	0.0151228	down
A01G151700v1	830.642	1.71958	0.265057	6.48757	8.72342e-11	1.13228e-09	up
A01G152500v1	3.48373	6.0193	1.89233	3.18089	0.00146824	0.00499382	up
A01G152600v1	76.3983	-1.43995	0.328822	-4.37912	1.19159e-05	6.63124e-05	down
A01G153500v1	124.316	1.252	0.270402	4.63014	3.65424e-06	2.26076e-05	up
A01G154500v1	3.45412	6.00913	2.2508	2.66977	0.00759028	0.0208862	up
A01G154700v1	462.9	-1.85123	0.236456	-7.82906	4.91528e-15	1.08307e-13	down
A01G155400v1	122.793	-1.79053	0.424171	-4.22124	2.42958e-05	0.000126667	down
A01G156800v1	27.8253	1.79539	0.502979	3.56951	0.000357652	0.00142998	up
A01G157300v1	16.3221	3.11398	0.700081	4.44802	8.66649e-06	4.97052e-05	up
A01G157400v1	717.703	1.4646	0.274075	5.34379	9.10215e-08	7.51306e-07	up
A01G158100v1	11.752	2.34594	0.785348	2.98714	0.00281604	0.00881161	up
A01G158200v1	97.2242	1.07655	0.27773	3.87623	0.000106086	0.000481211	up
A01G158600v1	5.03285	6.55264	1.76845	3.7053	0.000211141	0.00089507	up
A01G158900v1	548.915	3.84712	0.243776	15.7814	4.17951e-56	9.51643e-54	up
A01G159300v1	8.19378	4.18164	1.16902	3.57704	0.000347512	0.00139461	up
A01G159400v1	111.516	6.24703	0.566241	11.0325	2.66503e-28	1.71918e-26	up
A01G160400v1	5.31687	6.63307	1.85252	3.58057	0.00034285	0.00137833	up
A01G161400v1	14.0748	-3.00015	0.860199	-3.48774	0.000487127	0.00187975	down
A01G161800v1	36.4675	4.21903	0.972987	4.33617	1.4499e-05	7.91891e-05	up
A01G162200v1	38.622	3.89482	0.541258	7.19586	6.20662e-13	1.07726e-11	up
A01G162900v1	8.99703	-2.48968	0.962526	-2.58661	0.00969263	0.0257408	down
A01G163100v1	42.7216	-2.22055	0.46685	-4.75645	1.9703e-06	1.28178e-05	down
A01G163800v1	74.5277	2.94579	0.333012	8.84589	9.08044e-19	2.85983e-17	up
A01G164000v1	3.55497	4.57166	1.83008	2.49806	0.0124875	0.0319394	up
A01G164200v1	60.7508	1.20538	0.31819	3.78824	0.000151718	0.000663714	up
A01G164500v1	66.0527	2.19702	0.404406	5.43271	5.55052e-08	4.71738e-07	up
A01G164900v1	48.2289	1.74774	0.39563	4.4176	9.9801e-06	5.64492e-05	up
A01G165100v1	28.5302	4.40114	0.828837	5.31002	1.09611e-07	8.92995e-07	up
A01G165200v1	297.834	-1.27135	0.200468	-6.34193	2.26906e-10	2.77768e-09	down
A01G166300v1	19.7391	4.72941	0.884284	5.3483	8.87843e-08	7.34121e-07	up
A01G166400v1	2.84574	5.72809	1.93276	2.96369	0.00303973	0.00942664	up
A01G166500v1	51.1008	3.85311	0.648901	5.93791	2.88686e-09	3.00094e-08	up
A01G167400v1	679.615	4.56899	0.436962	10.4563	1.37147e-25	7.33801e-24	up
A01G167500v1	77.8926	-2.00741	0.322789	-6.21895	5.00478e-10	5.84164e-09	down
A01G168500v1	27.5117	-1.30489	0.514485	-2.5363	0.011203	0.0291351	down
A01G168600v1	315.449	1.68018	0.306871	5.4752	4.3701e-08	3.77597e-07	up
A01G168700v1	11.6068	7.75747	1.82968	4.23981	2.23712e-05	0.000117518	up
A01G168900v1	174.974	-2.68005	0.25587	-10.4743	1.13415e-25	6.11081e-24	down
A01G169000v1	170.169	-3.72241	0.309223	-12.0379	2.24485e-33	1.96871e-31	down
A01G169600v1	28.0455	5.98289	1.08679	5.50512	3.68926e-08	3.2244e-07	up
A01G171200v1	217.146	1.40274	0.352796	3.97606	7.00661e-05	0.00033091	up
A01G172400v1	24.4248	1.1192	0.484506	2.30998	0.0208895	0.0495495	up
A01G172800v1	93.9576	2.15524	0.479859	4.49141	7.07544e-06	4.13633e-05	up
A01G173500v1	486.678	1.66745	0.183655	9.07922	1.09354e-19	3.72041e-18	up
A01G173600v1	154.135	1.14921	0.233188	4.92826	8.29636e-07	5.78074e-06	up
A01G174000v1	42.4523	2.33485	0.438726	5.32189	1.02695e-07	8.40663e-07	up
A01G175000v1	2126.45	1.40491	0.313073	4.48747	7.20728e-06	4.20661e-05	up
A01G176100v1	4.09184	-5.13661	1.66092	-3.09264	0.00198387	0.00650813	down
A01G176500v1	529.049	2.34764	0.175477	13.3786	8.06508e-41	1.02442e-38	up
A01G176700v1	346.194	1.88701	0.205097	9.20057	3.5604e-20	1.26595e-18	up
A01G177600v1	64.2503	-1.83939	0.394467	-4.66298	3.11667e-06	1.95334e-05	down
A01G177800v1	249.67	-2.13077	0.364099	-5.85219	4.85151e-09	4.87125e-08	down
A01G178000v1	167.662	1.00855	0.239353	4.21364	2.51288e-05	0.000130466	up
A01G178500v1	137.529	5.46931	0.41063	13.3193	1.78745e-40	2.25178e-38	up
A01G178600v1	589.209	1.10202	0.352122	3.12965	0.00175016	0.00582884	up
A01G178700v1	94.5086	2.02326	0.402005	5.03292	4.83065e-07	3.51532e-06	up
A01G179100v1	22.5506	-2.37725	0.568841	-4.17911	2.92646e-05	0.000149812	down
A01G179700v1	2.53019	5.55846	2.01796	2.75449	0.00587835	0.0167176	up
A01G179800v1	12.105	6.3638	1.56408	4.06872	4.72718e-05	0.000231177	up
A01G179900v1	9.77079	7.50899	1.6188	4.63862	3.50737e-06	2.17866e-05	up
A01G180000v1	128.766	-1.27794	0.309973	-4.12275	3.7438e-05	0.000187196	down
A01G181600v1	47.0753	-1.84414	0.476541	-3.86985	0.000108904	0.000492577	down
A01G181700v1	124.028	2.17435	0.345607	6.2914	3.14623e-10	3.77554e-09	up
A01G182000v1	161.987	-1.02305	0.284176	-3.60007	0.00031813	0.00129059	down
A01G182300v1	177.378	-9.61033	1.20411	-7.98128	1.4482e-15	3.38265e-14	down
A01G182400v1	96.3121	1.78	0.315473	5.64232	1.67774e-08	1.55335e-07	up
A01G182700v1	191.477	1.65755	0.343594	4.82415	1.40604e-06	9.40167e-06	up
A01G183200v1	101.272	1.23801	0.312687	3.95927	7.51798e-05	0.00035265	up
A01G183700v1	807.272	1.6406	0.185445	8.84683	9.0041e-19	2.83892e-17	up
A01G184000v1	78.903	-1.37547	0.484055	-2.84156	0.00448928	0.0132374	down
A01G184100v1	54.1463	-1.36696	0.349076	-3.91593	9.00555e-05	0.000414831	down
A01G184200v1	75.7191	8.01701	1.07268	7.47384	7.78856e-14	1.47829e-12	up
A01G184300v1	86.1172	1.58705	0.298798	5.31146	1.08752e-07	8.86682e-07	up
A01G185500v1	4.43327	6.36706	1.77725	3.58254	0.000340269	0.00136974	up
A01G185900v1	15.6369	3.04857	0.733494	4.15624	3.23532e-05	0.000164053	up
A01G186000v1	130.393	1.62514	0.317314	5.12155	3.0304e-07	2.28673e-06	up
A01G187800v1	46.0517	4.44934	0.554894	8.01836	1.07167e-15	2.54081e-14	up
A01G188200v1	16.5268	-1.88798	0.696133	-2.71209	0.00668596	0.0187088	down
A01G189000v1	5727.36	2.89469	0.47444	6.10128	1.05222e-09	1.16764e-08	up
A01G190300v1	992.054	-1.72467	0.321321	-5.36744	7.98628e-08	6.65004e-07	down
A01G190500v1	8.29257	7.26906	1.77222	4.10167	4.10184e-05	0.000203296	up
A01G190600v1	73.194	-1.59983	0.433183	-3.6932	0.000221446	0.000933222	down
A01G190700v1	9.48258	-2.90361	0.988597	-2.9371	0.00331295	0.0101703	down
A01G190800v1	411.981	-4.05769	0.292353	-13.8794	8.44613e-44	1.20195e-41	down
A01G190900v1	275.535	-1.74835	0.341076	-5.12598	2.96e-07	2.23663e-06	down
A01G191500v1	25.0147	-3.3727	0.651313	-5.1783	2.23912e-07	1.72868e-06	down
A01G191700v1	61.0246	1.5276	0.334969	4.56043	5.10483e-06	3.06774e-05	up
A01G191800v1	4.59536	3.91713	1.40728	2.78348	0.00537796	0.0154981	up
A01G191900v1	17.063	2.72942	0.677517	4.02856	5.61184e-05	0.000270609	up
A01G192200v1	235.395	4.12101	0.422077	9.76365	1.6125e-22	6.8746e-21	up
A01G192300v1	162.572	1.48335	0.23338	6.35593	2.07164e-10	2.54818e-09	up
A01G192600v1	24.9421	-2.80119	0.590684	-4.74228	2.11322e-06	1.36608e-05	down
A01G192700v1	44.3197	3.52386	0.485929	7.2518	4.11266e-13	7.25284e-12	up
A01G192800v1	120.165	2.34856	0.462689	5.07588	3.85697e-07	2.85303e-06	up
A01G193400v1	306.987	4.35389	0.371332	11.725	9.48505e-32	7.4854e-30	up
A01G193800v1	788.959	1.16528	0.241295	4.82929	1.37024e-06	9.17626e-06	up
A01G194400v1	22.1536	2.36811	0.543394	4.358	1.31254e-05	7.22844e-05	up
A01G194700v1	44.1521	-1.7149	0.463013	-3.70378	0.000212409	0.000899766	down
A01G194800v1	137.489	1.05204	0.238178	4.41704	1.00061e-05	5.6586e-05	up
A01G194900v1	23.7223	1.52137	0.485314	3.13481	0.00171963	0.00573973	up
A01G195200v1	4374.65	2.74069	0.24864	11.0227	2.96941e-28	1.90753e-26	up
A01G195700v1	5.20182	4.10456	1.44934	2.83202	0.00462554	0.0135877	up
A01G195900v1	10.3531	3.04041	1.02188	2.97531	0.00292695	0.00911783	up
A01G196100v1	254.959	1.22874	0.20946	5.86622	4.45852e-09	4.50742e-08	up
A01G196200v1	20.5248	-1.53963	0.605556	-2.54251	0.0110061	0.0287178	down
A01G196600v1	5.3061	-3.46559	1.35524	-2.55718	0.0105525	0.0276941	down
A01G197400v1	453.727	-1.88097	0.192549	-9.76875	1.53337e-22	6.55999e-21	down
A01G198400v1	21.8664	-2.20767	0.581582	-3.79597	0.000147065	0.000645056	down
A01G198500v1	27.3347	-1.65043	0.554148	-2.97832	0.00289831	0.00903638	down
A01G198700v1	28.4194	-3.28786	0.633003	-5.19407	2.05747e-07	1.59686e-06	down
A01G199100v1	62.9263	1.34751	0.372814	3.61441	0.000301028	0.00122778	up
A01G199200v1	71.1515	3.96313	0.417479	9.49302	2.24431e-21	8.74911e-20	up
A01G201000v1	3.68519	3.57834	1.45856	2.45333	0.0141541	0.0355236	up
A01G201100v1	14.5696	2.4649	0.836624	2.94625	0.00321656	0.00990406	up
A01G201200v1	150.12	1.10463	0.241835	4.56769	4.9313e-06	2.97246e-05	up
A01G202600v1	105.826	-1.09544	0.266639	-4.10835	3.98502e-05	0.000198033	down
A01G203300v1	165.86	1.10663	0.226706	4.88137	1.05351e-06	7.19709e-06	up
A01G203500v1	47.0321	-1.18226	0.437446	-2.70264	0.00687906	0.0191741	down
A01G203800v1	130.103	-1.0093	0.363664	-2.77536	0.00551405	0.0158376	down
A01G204100v1	317.032	-1.14684	0.247429	-4.63504	3.56876e-06	2.2134e-05	down
A01G204600v1	34.0728	2.99963	0.582866	5.14634	2.65621e-07	2.02199e-06	up
A01G204700v1	93.4469	-6.44658	0.718931	-8.9669	3.04981e-19	1.00103e-17	down
A01G206400v1	53.4605	6.50817	0.803065	8.10416	5.31121e-16	1.29776e-14	up
A01G207100v1	5210.17	2.50386	0.192166	13.0297	8.2919e-39	9.76554e-37	up
A01G207800v1	17.3198	2.75639	0.637915	4.32094	1.55369e-05	8.42788e-05	up
A01G208300v1	67.7012	-1.12688	0.393881	-2.86096	0.00422355	0.012555	down
A01G209000v1	16.5503	-1.77235	0.689124	-2.57189	0.0101146	0.026693	down
A01G209600v1	1297.97	2.18457	0.164043	13.317	1.84332e-40	2.31741e-38	up
A01G209700v1	253.241	1.06723	0.200407	5.32533	1.00769e-07	8.25888e-07	up
A01G210400v1	13.4313	2.15659	0.664151	3.24714	0.00116573	0.00407746	up
A01G211500v1	69.2525	-1.10795	0.316884	-3.49639	0.000471604	0.00182678	down
A01G211700v1	49.6064	2.21024	0.430817	5.13035	2.89206e-07	2.18852e-06	up
A01G212000v1	36.7594	-1.51606	0.414729	-3.65556	0.000256626	0.00106376	down
A01G212600v1	814.665	3.06511	0.311757	9.83175	8.21763e-23	3.60082e-21	up
A01G213100v1	230.405	-1.12477	0.207258	-5.42693	5.73325e-08	4.85955e-07	down
A01G213200v1	615.912	1.50207	0.30786	4.87908	1.06579e-06	7.27332e-06	up
A01G214500v1	45.2909	5.93886	0.753843	7.87812	3.32345e-15	7.45405e-14	up
A01G214600v1	707.834	3.11615	0.238859	13.046	6.69546e-39	7.91571e-37	up
A01G214800v1	13.9794	6.57175	1.55321	4.23108	2.32568e-05	0.000121733	up
A01G215000v1	128.655	1.06349	0.253583	4.19387	2.74232e-05	0.000141091	up
A01G215700v1	8.0159	3.3822	1.17508	2.87826	0.00399878	0.0119703	up
A01G215800v1	5289.35	3.85689	0.443522	8.69606	3.43621e-18	1.02647e-16	up
A01G216100v1	208.259	1.87562	0.23676	7.92205	2.33623e-15	5.32139e-14	up
A01G216900v1	130.758	-1.99732	0.263064	-7.59251	3.13757e-14	6.26872e-13	down
A01G217700v1	52.0736	1.26865	0.367767	3.44961	0.000561396	0.00213043	up
A01G217900v1	277.41	-1.05301	0.23873	-4.41086	1.02962e-05	5.80982e-05	down
A01G218200v1	566.946	4.36922	0.386261	11.3116	1.15035e-29	8.11011e-28	up
A01G218300v1	638.418	3.8653	0.382942	10.0937	5.89042e-24	2.8469e-22	up
A01G219200v1	337.315	1.05792	0.263678	4.01215	6.01677e-05	0.000288258	up
A01G219400v1	119.871	-1.44044	0.25783	-5.5868	2.31296e-08	2.09324e-07	down
A01G220800v1	14.7475	8.10348	1.65094	4.90842	9.18142e-07	6.33996e-06	up
A01G222100v1	7291.05	2.4082	0.240901	9.99662	1.57684e-23	7.4056e-22	up
A01G222200v1	7.39051	5.64031	1.64067	3.43781	0.000586436	0.00221417	up
A01G222400v1	4.61447	-4.24357	1.56248	-2.71592	0.00660918	0.0185226	down
A01G222600v1	55.7071	-1.14395	0.437951	-2.61206	0.00899986	0.0241672	down
A01G223500v1	33.9353	1.41209	0.424554	3.32606	0.000880839	0.00317678	up
A01G223600v1	84.8208	1.69167	0.365311	4.63077	3.64313e-06	2.25513e-05	up
A01G223800v1	12.0141	7.80599	1.58259	4.93242	8.12176e-07	5.67517e-06	up
A01G224200v1	37.5314	-1.55721	0.458272	-3.398	0.000678804	0.00252333	down
A01G224700v1	135.382	-1.47558	0.47869	-3.08254	0.0020524	0.00670409	down
A01G224800v1	195.557	-1.60634	0.231762	-6.93098	4.17933e-12	6.51122e-11	down
A01G225100v1	156.871	-2.17042	0.581803	-3.73051	0.000191094	0.000816732	down
A01G225600v1	355.594	2.12266	0.285969	7.4227	1.14757e-13	2.14175e-12	up
A01G225900v1	124.616	1.95677	0.280909	6.96586	3.26399e-12	5.16552e-11	up
A01G226000v1	34.52	1.43939	0.582011	2.47313	0.0133935	0.0338915	up
A01G227200v1	738.088	-2.43073	0.50372	-4.82557	1.39606e-06	9.34106e-06	down
A01G227300v1	2915.64	2.91556	0.325691	8.95193	3.49311e-19	1.14287e-17	up
A01G227500v1	203.639	1.17989	0.238947	4.93789	7.8971e-07	5.53265e-06	up
A01G227600v1	10.2412	6.11684	1.59977	3.82358	0.000131528	0.000583231	up
A01G228600v1	42.2668	-1.75867	0.441076	-3.98723	6.68496e-05	0.000317107	down
A01G229200v1	1162.38	1.24247	0.155078	8.01191	1.12942e-15	2.66948e-14	up
A01G230200v1	25.5553	1.235	0.462437	2.67063	0.00757099	0.0208429	up
A01G230300v1	6.06556	2.40291	1.01485	2.36775	0.0178967	0.0434395	up
A01G230700v1	9.44479	2.114	0.847955	2.49306	0.0126648	0.0323188	up
A01G230800v1	642.758	2.29779	0.185298	12.4006	2.59513e-35	2.57324e-33	up
A01G231600v1	728.753	1.40884	0.245752	5.73279	9.87945e-09	9.48554e-08	up
A01G231700v1	57.7086	2.36368	0.379389	6.23023	4.65755e-10	5.46331e-09	up
A01G232100v1	17.3004	-4.24591	0.925748	-4.58647	4.50811e-06	2.74102e-05	down
A01G232200v1	89.2308	-1.24434	0.382172	-3.25598	0.00113003	0.00396569	down
A01G232500v1	42.3272	1.39893	0.391045	3.57741	0.000347016	0.00139289	up
A01G232600v1	93.6028	1.4117	0.346234	4.07731	4.55604e-05	0.00022368	up
A01G233000v1	153.618	-2.78549	0.341919	-8.14663	3.74203e-16	9.30242e-15	down
A01G233300v1	4.76866	-5.35754	1.59483	-3.35932	0.000781346	0.00285924	down
A01G233400v1	100.433	-8.78759	1.21518	-7.23152	4.77611e-13	8.37242e-12	down
A01G233600v1	120.212	-7.13975	0.772116	-9.247	2.30885e-20	8.325e-19	down
A01G233700v1	15.465	-7.05494	1.32016	-5.34402	9.09065e-08	7.50659e-07	down
A01G234900v1	27.7673	-1.244	0.483624	-2.57225	0.010104	0.0266709	down
A01G235300v1	35.2165	4.27783	0.612672	6.98224	2.90503e-12	4.61957e-11	up
A01G236400v1	117.223	-1.19168	0.259507	-4.59208	4.38853e-06	2.67653e-05	down
A01G236600v1	20.5672	3.7415	0.704897	5.30787	1.10912e-07	9.02881e-07	up
A01G236900v1	25.0447	-1.86663	0.595607	-3.13399	0.00172444	0.00575315	down
A01G237600v1	42.6905	-1.67966	0.412114	-4.07571	4.58744e-05	0.00022506	down
A01G237800v1	159.378	-1.80501	0.346615	-5.20752	1.91382e-07	1.49556e-06	down
A01G238000v1	3252.93	1.35447	0.179676	7.53842	4.75688e-14	9.30444e-13	up
A01G238100v1	2003.67	2.22752	0.145566	15.3025	7.35728e-53	1.48784e-50	up
A01G238800v1	44.6276	-1.87037	0.517366	-3.61518	0.000300142	0.00122449	down
A01G239900v1	545.418	-1.56759	0.196489	-7.97799	1.48735e-15	3.46618e-14	down
A01G240400v1	314.415	1.31941	0.256374	5.14643	2.65488e-07	2.02148e-06	up
A01G241100v1	10.3205	-3.43151	1.03264	-3.32304	0.000890425	0.00320683	down
A01G241500v1	62.1107	1.52264	0.414832	3.67051	0.000242068	0.00100981	up
A01G242100v1	16.0873	2.04728	0.680944	3.00653	0.00264248	0.00833513	up
A01G242200v1	764.249	1.26748	0.158782	7.98253	1.43363e-15	3.35115e-14	up
A01G243000v1	2683.08	1.73151	0.173834	9.96071	2.26431e-23	1.04877e-21	up
A01G243400v1	35.0356	-1.07609	0.432313	-2.48915	0.0128049	0.03261	down
A01G243600v1	30.4482	-3.13856	0.563081	-5.57391	2.49091e-08	2.24142e-07	down
A01G245300v1	1613.52	-1.43513	0.427725	-3.35528	0.000792854	0.00289529	down
A01G245700v1	818.474	2.8062	0.262424	10.6934	1.09304e-26	6.38755e-25	up
A01G245800v1	518.569	4.24421	0.257818	16.462	6.87661e-61	1.8301e-58	up
A01G246800v1	838.722	2.07205	0.235362	8.80367	1.32416e-18	4.11969e-17	up
A01G246900v1	159.444	2.29388	0.376901	6.08616	1.15648e-09	1.27842e-08	up
A01G247000v1	8197.77	1.4208	0.134869	10.5347	5.97867e-26	3.29052e-24	up
A01G247500v1	37.3382	-1.49497	0.430331	-3.47399	0.000512779	0.00196624	down
A01G247900v1	133.713	3.55089	0.652084	5.44545	5.16744e-08	4.41466e-07	up
A01G248300v1	26.9511	-1.3986	0.50181	-2.7871	0.00531817	0.0153517	down
A01G248700v1	63.9629	-1.49103	0.501671	-2.97213	0.00295743	0.00920203	down
A01G248800v1	458.464	1.22861	0.222783	5.51483	3.49108e-08	3.06339e-07	up
A01G249000v1	39.8636	1.81708	0.431133	4.21467	2.50148e-05	0.000129962	up
A01G249400v1	77.4216	10.4942	1.4748	7.11564	1.11392e-12	1.87464e-11	up
A01G249600v1	10.6024	5.1574	1.21423	4.24746	2.16211e-05	0.000113987	up
A01G249900v1	304.483	1.02873	0.221455	4.64532	3.3955e-06	2.11547e-05	up
A01G250500v1	105.525	-2.92809	0.319765	-9.157	5.33597e-20	1.8628e-18	down
A01G250600v1	946.339	-1.93927	0.327008	-5.93036	3.02271e-09	3.13473e-08	down
A01G250800v1	1631.74	-1.87236	0.342715	-5.46332	4.67324e-08	4.01982e-07	down
A01G251300v1	1062.34	1.24498	0.176812	7.04127	1.90498e-12	3.11634e-11	up
A01G251600v1	613.458	1.0109	0.169132	5.97701	2.27275e-09	2.4032e-08	up
A01G251700v1	190.681	1.47583	0.255454	5.77727	7.59215e-09	7.41097e-08	up
A01G251800v1	661.594	-2.49373	0.487779	-5.11242	3.18053e-07	2.38975e-06	down
A01G251900v1	36.5112	-8.29439	1.25369	-6.61596	3.69149e-11	5.07132e-10	down
A01G252300v1	123.797	2.15641	0.384138	5.61363	1.98123e-08	1.81331e-07	up
A01G252400v1	48.634	2.25818	0.450768	5.00963	5.45335e-07	3.92709e-06	up
A01G252500v1	157.193	6.6047	0.541129	12.2054	2.90831e-34	2.66857e-32	up
A01G252800v1	58.9949	6.05587	0.726896	8.33114	8.00685e-17	2.10628e-15	up
A01G252900v1	6.38436	3.36148	1.07444	3.12859	0.00175649	0.00584611	up
A01G253500v1	34.9826	2.01643	0.444061	4.5409	5.60156e-06	3.33916e-05	up
A01G254000v1	183.814	1.44172	0.383755	3.75687	0.000172049	0.000743032	up
A01G254900v1	55.9168	1.16623	0.463353	2.51693	0.0118382	0.0305238	up
A01G255200v1	2621.28	2.17975	0.203289	10.7224	7.98874e-27	4.72689e-25	up
A01G255300v1	200.212	4.68356	0.330215	14.1834	1.16103e-45	1.8162e-43	up
A01G255500v1	120.812	-2.59703	0.314089	-8.26843	1.3573e-16	3.48114e-15	down
A01G255700v1	43.8993	-1.69226	0.480001	-3.52553	0.000422633	0.00165756	down
A01G256000v1	8.95077	-6.26599	1.41151	-4.43922	9.02854e-06	5.15748e-05	down
A01G256200v1	400.151	-2.44041	0.341378	-7.14869	8.76113e-13	1.49655e-11	down
A01G256300v1	17.0787	-1.95408	0.746661	-2.61709	0.0088684	0.0238632	down
A01G256500v1	69.7027	4.20338	0.424059	9.91225	3.68247e-23	1.67199e-21	up
A01G256700v1	3.66958	3.58273	1.51411	2.36623	0.0179703	0.0435888	up
A01G257100v1	592.059	1.15216	0.199256	5.78233	7.36746e-09	7.19964e-08	up
A01G257600v1	26.6989	1.69389	0.49044	3.45381	0.000552736	0.00210146	up
A01G258400v1	31.3718	-1.08588	0.450289	-2.41151	0.0158867	0.0392472	down
A01G258600v1	339.521	2.91053	0.217358	13.3905	6.87327e-41	8.76655e-39	up
A01G258700v1	534.54	13.2814	1.45842	9.10671	8.49192e-20	2.91327e-18	up
A01G258900v1	39.0517	6.46604	0.968998	6.67291	2.50782e-11	3.51994e-10	up
A01G259600v1	12.4178	-2.34529	0.9004	-2.60472	0.00919481	0.0245962	down
A01G259900v1	446.773	2.08962	0.234349	8.91672	4.80308e-19	1.55084e-17	up
A01G260100v1	2096.77	4.23792	0.405692	10.4461	1.52599e-25	8.13647e-24	up
A01G260300v1	65.8636	-1.17928	0.359532	-3.28005	0.00103789	0.00367462	down
A01G260600v1	30.3371	1.15279	0.439658	2.62201	0.00874117	0.0235714	up
A02G000100v1	5.2933	-3.47215	1.35591	-2.56075	0.0104446	0.027458	down
A02G000300v1	18.9489	8.46378	1.54614	5.47414	4.39651e-08	3.79773e-07	up
A02G001100v1	23.138	-1.3604	0.508763	-2.67395	0.00749644	0.0206654	down
A02G001300v1	215.272	1.01467	0.201898	5.02564	5.01745e-07	3.64177e-06	up
A02G001400v1	172.388	1.04215	0.390301	2.67012	0.00758239	0.0208677	up
A02G001600v1	98.3918	2.63796	0.331975	7.94624	1.92254e-15	4.42668e-14	up
A02G001900v1	183.405	1.99648	0.225056	8.87104	7.24649e-19	2.31185e-17	up
A02G002100v1	48.3997	-1.53869	0.39606	-3.88501	0.000102326	0.0004656	down
A02G002700v1	498.207	2.33792	0.176424	13.2517	4.40962e-40	5.41098e-38	up
A02G003200v1	85.9952	-1.7916	0.348526	-5.14051	2.73996e-07	2.08162e-06	down
A02G004900v1	593.64	-1.51698	0.175896	-8.62431	6.44783e-18	1.87686e-16	down
A02G005000v1	395.474	-1.15504	0.28203	-4.09546	4.21339e-05	0.000208472	down
A02G005400v1	184.239	1.25425	0.222849	5.62823	1.8207e-08	1.67762e-07	up
A02G005600v1	14.704	1.75979	0.695479	2.53033	0.0113954	0.0295644	up
A02G006000v1	23.76	7.34279	1.56701	4.68587	2.7878e-06	1.7654e-05	up
A02G006100v1	4.1118	6.25898	1.84721	3.38833	0.000703185	0.0026042	up
A02G006200v1	20.5414	8.57998	1.52848	5.61342	1.98364e-08	1.81525e-07	up
A02G006500v1	193.2	11.8136	1.46337	8.07289	6.86541e-16	1.66037e-14	up
A02G006600v1	39.9645	4.24327	0.558652	7.59556	3.06474e-14	6.13917e-13	up
A02G007300v1	129.607	3.65438	0.319073	11.4531	2.26842e-30	1.66217e-28	up
A02G007400v1	310.882	1.21409	0.217608	5.57928	2.41511e-08	2.17735e-07	up
A02G007500v1	348.783	2.66598	0.434645	6.1337	8.58606e-10	9.64806e-09	up
A02G007700v1	120.661	-1.76238	0.288392	-6.11105	9.89779e-10	1.10393e-08	down
A02G008100v1	4323.47	1.33837	0.135167	9.90159	4.09724e-23	1.84939e-21	up
A02G009800v1	6.16343	2.95413	1.08951	2.71144	0.00669927	0.0187409	up
A02G009900v1	855.946	2.2167	0.270706	8.18859	2.64306e-16	6.64571e-15	up
A02G010100v1	5.6204	-5.59497	1.5652	-3.5746	0.000350768	0.00140611	down
A02G010900v1	8.27193	3.13121	1.23419	2.53705	0.011179	0.0290765	up
A02G011000v1	86.0401	1.25284	0.345976	3.62117	0.00029327	0.0011994	up
A02G011200v1	93.542	-1.62012	0.308179	-5.25707	1.46367e-07	1.16648e-06	down
A02G011300v1	33.4521	-1.78174	0.552844	-3.22286	0.00126918	0.00439234	down
A02G011600v1	96.138	5.88966	0.521409	11.2957	1.37838e-29	9.67335e-28	up
A02G011800v1	1238.82	1.8343	0.150398	12.1963	3.25223e-34	2.96204e-32	up
A02G011900v1	47.5135	-1.99039	0.50544	-3.93794	8.21835e-05	0.000382496	down
A02G012200v1	68.4614	2.63871	0.357323	7.38465	1.52857e-13	2.81269e-12	up
A02G012800v1	2.62264	-4.49513	1.88687	-2.38232	0.0172041	0.0419755	down
A02G013000v1	796.704	-1.02433	0.249315	-4.1086	3.98068e-05	0.000197866	down
A02G013300v1	41.3589	1.9677	0.402159	4.89283	9.93948e-07	6.81594e-06	up
A02G014100v1	11.9339	-2.97813	0.913844	-3.2589	0.00111843	0.0039298	down
A02G014500v1	104.075	1.38361	0.279037	4.9585	7.10378e-07	5.01976e-06	up
A02G015100v1	23.0335	-1.99301	0.563973	-3.53387	0.000409528	0.00161099	down
A02G016200v1	3.1105	-4.7412	1.78835	-2.65116	0.00802151	0.0219075	down
A02G016300v1	139.41	-4.76903	0.38754	-12.3059	8.42004e-35	7.98826e-33	down
A02G016700v1	29.6566	-5.06792	0.885517	-5.72312	1.04584e-08	1.00039e-07	down
A02G017200v1	4.57689	-5.29827	1.61263	-3.28547	0.00101811	0.00361405	down
A02G017400v1	2.53237	-4.44437	1.90756	-2.32988	0.0198126	0.0473588	down
A02G017500v1	33.7533	-8.18114	1.26932	-6.44529	1.15377e-10	1.47098e-09	down
A02G018300v1	37.1423	-1.64928	0.42535	-3.87745	0.000105556	0.000478983	down
A02G019000v1	212.127	-1.66216	0.243992	-6.81238	9.59986e-12	1.42691e-10	down
A02G019700v1	4.64658	3.92851	1.41031	2.78557	0.00534331	0.0154105	up
A02G019900v1	54.1601	-1.18765	0.359811	-3.30076	0.000964218	0.00344368	down
A02G020100v1	28.7681	1.97583	0.776066	2.54596	0.0108977	0.0284883	up
A02G020600v1	73.006	-4.54154	0.4996	-9.09034	9.87317e-20	3.3702e-18	down
A02G020700v1	15.5188	-7.06016	1.33769	-5.27786	1.30698e-07	1.05018e-06	down
A02G020800v1	139.323	-10.2262	1.2092	-8.45701	2.7431e-17	7.60999e-16	down
A02G021100v1	5.45391	-5.55118	1.54937	-3.58285	0.00033986	0.00136855	down
A02G021200v1	20.9135	-3.66251	0.722697	-5.06784	4.02358e-07	2.96877e-06	down
A02G021500v1	50.0585	-8.74959	1.23358	-7.09285	1.31378e-12	2.1906e-11	down
A02G021800v1	5.91342	2.6094	1.08678	2.40102	0.0163492	0.040204	up
A02G022200v1	913.413	-1.40537	0.197328	-7.12201	1.06366e-12	1.79447e-11	down
A02G023000v1	80.0179	1.12196	0.288907	3.88347	0.000102977	0.000468179	up
A02G023300v1	4.29573	3.82152	1.45349	2.62921	0.00855846	0.0231566	up
A02G023600v1	156.835	-1.20443	0.312036	-3.85991	0.000113427	0.000510703	down
A02G024000v1	33.9991	-1.28089	0.431878	-2.96587	0.00301826	0.00937231	down
A02G024200v1	32.0266	-2.13308	0.636466	-3.35145	0.000803894	0.002929	down
A02G024600v1	1335.98	2.07715	0.192514	10.7896	3.85515e-27	2.32356e-25	up
A02G024700v1	147.768	-2.22427	0.417016	-5.33377	9.61962e-08	7.91469e-07	down
A02G024800v1	165.806	1.52175	0.271994	5.59478	2.20908e-08	2.00632e-07	up
A02G025100v1	15.1097	5.08076	1.00823	5.03929	4.6727e-07	3.41006e-06	up
A02G025300v1	113.184	11.0424	1.48219	7.45006	9.32945e-14	1.75583e-12	up
A02G028000v1	6.90936	7.00987	1.75876	3.98568	6.72862e-05	0.00031908	up
A02G028600v1	40.2045	-3.00599	0.477418	-6.29635	3.04738e-10	3.66335e-09	down
A02G028700v1	11.3753	4.65568	1.07478	4.33177	1.47916e-05	8.05728e-05	up
A02G028900v1	89.1846	-2.95141	0.418963	-7.04455	1.86062e-12	3.04622e-11	down
A02G029000v1	8.19895	7.25549	1.7529	4.13914	3.48611e-05	0.000175554	up
A02G029100v1	37.9687	9.46589	1.50871	6.27418	3.51489e-10	4.19013e-09	up
A02G029300v1	92.7633	-3.29541	0.40166	-8.20447	2.31616e-16	5.84766e-15	down
A02G029800v1	3.24223	4.42791	1.91087	2.31722	0.0204917	0.0487243	up
A02G030400v1	985.88	1.01663	0.164508	6.1798	6.41846e-10	7.36171e-09	up
A02G031500v1	572.869	11.9349	1.87509	6.36496	1.9534e-10	2.41433e-09	up
A02G031900v1	9.7029	-2.6255	0.888283	-2.9557	0.00311957	0.0096465	down
A02G033200v1	21.5139	5.59494	0.976789	5.72789	1.01686e-08	9.74491e-08	up
A02G033400v1	6.66071	6.95389	1.71173	4.06249	4.8553e-05	0.000236689	up
A02G033500v1	20.8473	4.30357	0.740662	5.81044	6.23091e-09	6.15749e-08	up
A02G033700v1	33.3029	-1.12161	0.435184	-2.57733	0.00995679	0.0263445	down
A02G033900v1	29.2043	-1.69602	0.661354	-2.56447	0.0103335	0.0272127	down
A02G034000v1	24.4071	-1.47413	0.523438	-2.81625	0.00485876	0.0141881	down
A02G034100v1	110.334	-1.28849	0.464527	-2.77376	0.00554122	0.0159045	down
A02G034800v1	41.3421	2.8105	0.540214	5.20257	1.96549e-07	1.53147e-06	up
A02G035000v1	67.3033	1.13577	0.379876	2.98984	0.00279126	0.00874253	up
A02G035300v1	26.9036	1.9827	0.505685	3.92082	8.82472e-05	0.000407234	up
A02G035500v1	4.29842	-4.13583	1.57492	-2.62605	0.00863816	0.0233438	down
A02G035600v1	38.3552	-3.91737	0.629988	-6.21816	5.03033e-10	5.86811e-09	down
A02G036400v1	132.397	1.38413	0.308172	4.49142	7.07483e-06	4.13633e-05	up
A02G036900v1	2086.69	2.50915	0.256924	9.7661	1.57392e-22	6.72877e-21	up
A02G038000v1	177.654	-1.46714	0.256759	-5.71407	1.10305e-08	1.05038e-07	down
A02G038700v1	30.38	-4.77477	0.773923	-6.16957	6.84775e-10	7.8145e-09	down
A02G039300v1	3.31351	-4.8322	1.76129	-2.74356	0.00607775	0.0172146	down
A02G039400v1	21.5917	-1.84833	0.650496	-2.84141	0.00449144	0.0132425	down
A02G039900v1	5.17368	-3.4426	1.46156	-2.35543	0.0185011	0.0447026	down
A02G040600v1	16.0477	-2.27508	0.660422	-3.44488	0.000571309	0.00216484	down
A02G041000v1	323.227	-1.31596	0.423238	-3.10926	0.00187554	0.00619407	down
A02G041300v1	2.92996	-4.65455	1.84866	-2.5178	0.0118089	0.0304622	down
A02G042000v1	963.542	3.34566	0.216861	15.4277	1.06656e-53	2.23024e-51	up
A02G042100v1	121.085	1.42834	0.325037	4.39438	1.11089e-05	6.22329e-05	up
A02G042500v1	125.899	4.24553	0.356343	11.9142	9.98447e-33	8.41996e-31	up
A02G042700v1	635.6	3.22416	0.321358	10.0329	1.09251e-23	5.19042e-22	up
A02G043700v1	47.207	2.67533	0.45398	5.89305	3.79134e-09	3.88272e-08	up
A02G043900v1	301.012	1.3724	0.217203	6.31849	2.6414e-10	3.20539e-09	up
A02G045300v1	5.62747	6.71465	1.89472	3.54387	0.000394301	0.00155937	up
A02G045400v1	45.9347	-2.358	0.668879	-3.5253	0.000423008	0.00165871	down
A02G045600v1	95.3821	-2.22655	0.380766	-5.84756	4.98835e-09	4.99461e-08	down
A02G045700v1	91.0116	1.2723	0.33448	3.80381	0.000142488	0.000627082	up
A02G045800v1	3.66551	3.57294	1.47423	2.42359	0.0153678	0.0381488	up
A02G045900v1	142.169	1.68398	0.273448	6.15829	7.35342e-10	8.35458e-09	up
A02G046500v1	22.7734	-1.23446	0.516499	-2.39004	0.0168464	0.0412369	down
A02G046600v1	66.7142	-2.63599	0.380351	-6.93043	4.19572e-12	6.53343e-11	down
A02G047000v1	111.181	4.35827	0.40487	10.7646	5.05656e-27	3.03576e-25	up
A02G047100v1	635.967	-1.42003	0.348287	-4.07719	4.5583e-05	0.000223773	down
A02G047200v1	25.4648	-5.8819	1.1228	-5.2386	1.61801e-07	1.28002e-06	down
A02G047300v1	31.355	7.74817	2.98824	2.59289	0.00951739	0.025329	up
A02G047900v1	15.5294	-2.95461	0.773074	-3.8219	0.000132429	0.00058689	down
A02G048300v1	412.996	1.46373	0.231593	6.32027	2.61107e-10	3.17109e-09	up
A02G048600v1	7.81879	-4.10026	1.31144	-3.12654	0.00176877	0.00588287	down
A02G049600v1	3.4122	-4.87451	1.74942	-2.78636	0.0053304	0.0153829	down
A02G049800v1	37.5884	-8.33632	1.25041	-6.66685	2.61358e-11	3.66169e-10	down
A02G050100v1	115.84	11.0757	1.4725	7.5217	5.40684e-14	1.04824e-12	up
A02G051000v1	298.626	-1.7386	0.331612	-5.24286	1.58103e-07	1.2519e-06	down
A02G051500v1	736.643	-1.14585	0.204074	-5.61488	1.96693e-08	1.80076e-07	down
A02G053000v1	7.02742	-5.91672	1.49372	-3.96106	7.46171e-05	0.00035026	down
A02G053400v1	458.534	1.91616	0.41622	4.60372	4.15014e-06	2.54299e-05	up
A02G053600v1	40.3845	-4.69348	0.666796	-7.03885	1.9383e-12	3.16918e-11	down
A02G054600v1	176.417	1.37143	0.289517	4.73695	2.16954e-06	1.40074e-05	up
A02G055200v1	67.1557	-1.18795	0.390869	-3.03927	0.00237156	0.00759594	down
A02G055600v1	782.97	1.46021	0.426529	3.42346	0.000618293	0.0023217	up
A02G056600v1	32.5608	-1.99994	0.497204	-4.02237	5.76144e-05	0.00027717	down
A02G057400v1	3.88525	4.70145	1.84202	2.55234	0.0107003	0.0280305	up
A02G057500v1	31.1569	5.71484	0.956539	5.9745	2.30802e-09	2.43672e-08	up
A02G058600v1	22.5503	1.80653	0.560932	3.22059	0.00127928	0.00442405	up
A02G059400v1	25.5357	-1.66602	0.569055	-2.9277	0.00341477	0.0104323	down
A02G059500v1	569.415	1.77049	0.303684	5.83003	5.54178e-09	5.51193e-08	up
A02G060000v1	4754.1	-1.35311	0.182935	-7.39671	1.39602e-13	2.57662e-12	down
A02G060500v1	188.355	-1.90407	0.323623	-5.8836	4.0144e-09	4.09616e-08	down
A02G061000v1	68.4601	-1.23197	0.483278	-2.5492	0.0107969	0.0282524	down
A02G061500v1	44.2011	2.86901	0.414192	6.92678	4.30542e-12	6.68907e-11	up
A02G061600v1	869.776	3.02789	0.167381	18.0898	3.83498e-73	1.42026e-70	up
A02G061800v1	5.35241	-5.52414	1.55312	-3.5568	0.000375399	0.00149239	down
A02G063200v1	2.53518	-4.44588	1.91383	-2.32303	0.0201777	0.0480837	down
A02G063600v1	111.406	1.39559	0.344435	4.05183	5.08188e-05	0.00024703	up
A02G063700v1	184.851	-1.62983	0.235402	-6.92361	4.40266e-12	6.82629e-11	down
A02G064400v1	100.25	-1.66606	0.322081	-5.17279	2.30624e-07	1.77626e-06	down
A02G064500v1	526.349	-1.56832	0.309931	-5.06022	4.18773e-07	3.08285e-06	down
A02G064700v1	35.3486	-2.61063	0.508636	-5.13261	2.85749e-07	2.16369e-06	down
A02G066500v1	230.372	-1.1159	0.208861	-5.34277	9.15391e-08	7.55274e-07	down
A02G067300v1	299.483	-1.01011	0.204113	-4.94876	7.46877e-07	5.25592e-06	down
A02G067500v1	5.63259	-2.8887	1.18696	-2.43368	0.0149461	0.0372243	down
A02G067900v1	4156.63	2.68785	0.155213	17.3172	3.49231e-67	1.11242e-64	up
A02G068200v1	45.7414	-1.77383	0.522175	-3.397	0.000681278	0.0025313	down
A02G068400v1	3.99033	-5.10046	1.66765	-3.05848	0.00222466	0.00718532	down
A02G068700v1	21.1942	-3.27693	0.675103	-4.85397	1.21012e-06	8.16949e-06	down
A02G069000v1	2.83294	5.7234	1.95439	2.92849	0.00340618	0.0104082	up
A02G069100v1	110.302	2.50205	0.427006	5.85951	4.64229e-09	4.67782e-08	up
A02G069600v1	54.9107	-1.31294	0.528538	-2.48409	0.0129883	0.0330089	down
A02G070200v1	1331.3	2.45818	0.213186	11.5307	9.23954e-31	6.92707e-29	up
A02G070300v1	212.019	1.00306	0.21454	4.6754	2.93378e-06	1.8489e-05	up
A02G071700v1	52.2611	-1.54655	0.442398	-3.49584	0.000472573	0.00183007	down
A02G071900v1	64.3834	-2.85556	0.393115	-7.26393	3.76002e-13	6.65769e-12	down
A02G072100v1	235.007	-1.02549	0.236439	-4.33724	1.44283e-05	7.88801e-05	down
A02G072300v1	8.47062	4.22317	1.15144	3.66773	0.000244709	0.00101938	up
A02G072600v1	98.0087	-1.57579	0.324327	-4.85864	1.18194e-06	7.99537e-06	down
A02G073200v1	28.2352	4.22422	0.643586	6.56357	5.25342e-11	7.04701e-10	up
A02G073500v1	85.3639	5.47214	0.489651	11.1756	5.36869e-29	3.62693e-27	up
A02G073600v1	434.534	1.41656	0.200732	7.05697	1.70172e-12	2.80399e-11	up
A02G073700v1	251.064	1.00608	0.307028	3.27683	0.0010498	0.0037123	up
A02G073800v1	11.6822	4.69954	1.0361	4.53579	5.73892e-06	3.41607e-05	up
A02G074200v1	2652.38	2.49209	0.298466	8.34969	6.84447e-17	1.81604e-15	up
A02G074900v1	33.4438	-2.50581	0.583165	-4.29691	1.73197e-05	9.31387e-05	down
A02G075400v1	444.839	4.30635	0.256947	16.7597	4.81227e-63	1.36965e-60	up
A02G075500v1	22.7869	-1.32269	0.538852	-2.45465	0.0141023	0.0354125	down
A02G075800v1	1374.82	1.509	0.245024	6.15857	7.34064e-10	8.3416e-09	up
A02G076000v1	82.3633	1.01436	0.297024	3.41508	0.000637629	0.0023873	up
A02G076100v1	33.4063	-8.16617	1.25815	-6.49059	8.54991e-11	1.11125e-09	down
A02G076300v1	46.5266	-7.67241	1.24616	-6.15683	7.42134e-10	8.42241e-09	down
A02G076400v1	44.3165	-1.39349	0.384256	-3.62647	0.000287324	0.0011772	down
A02G076500v1	117.089	1.17865	0.321996	3.66044	0.000251784	0.00104644	up
A02G076600v1	157.002	-1.54344	0.260928	-5.91519	3.31484e-09	3.41981e-08	down
A02G077000v1	480.418	-2.03049	0.190749	-10.6448	1.8431e-26	1.05797e-24	down
A02G077300v1	75.6011	-2.15915	0.353339	-6.11071	9.91905e-10	1.1061e-08	down
A02G077400v1	311.756	1.77726	0.230557	7.70855	1.27253e-14	2.67183e-13	up
A02G077800v1	48.3299	-1.01513	0.405743	-2.50191	0.0123524	0.0316479	down
A02G078000v1	2.54795	5.56615	2.10162	2.6485	0.00808494	0.0220563	up
A02G078600v1	2.53515	5.56054	2.06493	2.69284	0.00708455	0.0196773	up
A02G078700v1	60.7427	-8.05944	1.2249	-6.57966	4.7151e-11	6.37638e-10	down
A02G079900v1	26.3222	-3.4581	0.627897	-5.50744	3.64086e-08	3.18482e-07	down
A02G080300v1	18.5953	5.38226	1.00067	5.37868	7.5034e-08	6.26663e-07	up
A02G080500v1	87.1301	-2.49534	0.348095	-7.16858	7.57796e-13	1.30277e-11	down
A02G080600v1	4.39635	-5.23996	1.66298	-3.15094	0.00162745	0.00546686	down
A02G080700v1	203.613	1.23855	0.243436	5.08778	3.62287e-07	2.69315e-06	up
A02G080800v1	15.1048	5.0802	1.02445	4.95896	7.08731e-07	5.01043e-06	up
A02G081100v1	387.54	1.61005	0.275613	5.84171	5.16663e-09	5.16218e-08	up
A02G082500v1	388.725	-2.32351	0.220932	-10.5168	7.22558e-26	3.92409e-24	down
A02G082800v1	136.566	-1.12088	0.362738	-3.09007	0.00200112	0.00655772	down
A02G083800v1	119.836	1.53802	0.28135	5.46658	4.58807e-08	3.95431e-07	up
A02G084300v1	450.057	-1.5711	0.318372	-4.9348	8.02325e-07	5.61591e-06	down
A02G084400v1	4.13052	6.26389	1.85289	3.3806	0.000723285	0.00266883	up
A02G084600v1	11.4214	7.73171	1.59679	4.84204	1.2851e-06	8.64188e-06	up
A02G084800v1	61.8775	1.13269	0.366348	3.09185	0.00198916	0.00652201	up
A02G087400v1	6.22943	-5.74304	1.50484	-3.81639	0.000135417	0.000598795	down
A02G087700v1	86.5502	-1.15067	0.378762	-3.03797	0.00238179	0.00762432	down
A02G087800v1	23.6168	1.9791	0.614439	3.22099	0.00127747	0.00441879	up
A02G088500v1	186.765	-10.6491	1.20412	-8.8439	9.24318e-19	2.9081e-17	down
A02G088700v1	111.719	-1.34275	0.324779	-4.13436	3.5595e-05	0.000178912	down
A02G088900v1	254.847	6.76127	0.45931	14.7205	4.76137e-49	8.50915e-47	up
A02G089700v1	58.7276	-1.44556	0.359419	-4.02194	5.77213e-05	0.000277641	down
A02G089900v1	8623.95	4.75589	0.46634	10.1983	2.01735e-24	1.00585e-22	up
A02G090300v1	275.883	1.66596	0.240259	6.934	4.09091e-12	6.38318e-11	up
A02G090400v1	28.7393	3.27424	0.601368	5.44465	5.19074e-08	4.4321e-07	up
A02G090500v1	85.1213	2.74842	0.306086	8.97924	2.72644e-19	8.97288e-18	up
A02G090900v1	11.9164	-2.25962	0.789675	-2.86146	0.004217	0.0125404	down
A02G091600v1	15.9083	5.74815	1.22535	4.69104	2.71825e-06	1.72474e-05	up
A02G091700v1	536.634	-1.11046	0.228836	-4.85263	1.21837e-06	8.2228e-06	down
A02G091900v1	63.6271	-1.55665	0.35232	-4.41828	9.94909e-06	5.62946e-05	down
A02G092000v1	36.1686	-2.21528	0.469721	-4.71616	2.40334e-06	1.53907e-05	down
A02G092900v1	396.939	-1.37068	0.211576	-6.47841	9.26918e-11	1.19639e-09	down
A02G093500v1	53.3931	-1.67152	0.372841	-4.48321	7.3529e-06	4.28184e-05	down
A02G095100v1	3.41501	-4.87563	1.75707	-2.77486	0.00552247	0.0158581	down
A02G095200v1	5.54368	-4.53048	1.51913	-2.98228	0.00286107	0.00893342	down
A02G095300v1	21.8876	4.88355	0.924214	5.284	1.26394e-07	1.01799e-06	up
A02G095700v1	983.118	11.132	0.859322	12.9544	2.21829e-38	2.53012e-36	up
A02G095800v1	120.648	1.48723	0.296647	5.01347	5.34584e-07	3.85735e-06	up
A02G095900v1	72.9697	-1.79472	0.414201	-4.33296	1.47117e-05	8.01657e-05	down
A02G096200v1	90.847	-3.05382	0.350075	-8.72335	2.70093e-18	8.15945e-17	down
A02G096600v1	23.142	-1.60752	0.628274	-2.55863	0.0105084	0.0275926	down
A02G096700v1	30.5058	-1.71465	0.727139	-2.35808	0.0183698	0.044437	down
A02G097000v1	106.137	-2.45835	0.296943	-8.27887	1.24353e-16	3.21348e-15	down
A02G097600v1	43.4784	1.30704	0.513419	2.54575	0.0109042	0.0285016	up
A02G098100v1	2356.3	-2.27048	0.815963	-2.78257	0.00539299	0.0155349	down
A02G098200v1	8.30054	-3.55293	1.22711	-2.89537	0.00378712	0.0114189	down
A02G098400v1	226.473	-1.13458	0.313877	-3.61473	0.000300664	0.00122646	down
A02G098700v1	608.885	2.00924	0.215375	9.32906	1.0681e-20	3.9628e-19	up
A02G098900v1	268.345	-1.54668	0.459786	-3.36392	0.00076845	0.00281689	down
A02G099100v1	11.3163	5.25506	1.255	4.1873	2.82289e-05	0.000144981	up
A02G099300v1	155.941	1.66679	0.246069	6.77367	1.25552e-11	1.83513e-10	up
A02G099400v1	261.811	1.11201	0.235926	4.71338	2.4364e-06	1.55926e-05	up
A02G099800v1	29.1879	5.02515	0.871831	5.7639	8.21913e-09	7.98747e-08	up
A02G101000v1	115.5	1.20099	0.36495	3.29083	0.000998934	0.00355452	up
A02G101200v1	130.603	-1.12752	0.261877	-4.30553	1.66586e-05	8.98197e-05	down
A02G101300v1	4.29261	3.81308	1.40764	2.70885	0.0067517	0.0188644	up
A02G101400v1	37.5869	3.3279	0.554399	6.00271	1.94045e-09	2.07466e-08	up
A02G101600v1	413.919	1.37704	0.27901	4.93545	7.99669e-07	5.5986e-06	up
A02G102300v1	22.8021	-2.15435	0.82156	-2.62227	0.00873462	0.0235579	down
A02G103100v1	79.2924	-1.55406	0.328166	-4.73559	2.18417e-06	1.40928e-05	down
A02G103300v1	61.3888	-1.0661	0.345185	-3.0885	0.00201171	0.00658849	down
A02G103600v1	68.3133	1.08962	0.383636	2.84025	0.00450778	0.0132824	up
A02G103800v1	8.97106	3.54401	0.986158	3.59375	0.000325948	0.00131857	up
A02G104000v1	212.756	-1.42399	0.254524	-5.59469	2.21011e-08	2.00696e-07	down
A02G104700v1	49.2546	-2.48379	0.424723	-5.84802	4.97469e-09	4.98255e-08	down
A02G104900v1	272.113	-1.94141	0.334703	-5.8004	6.61557e-09	6.50729e-08	down
A02G105000v1	34.6254	-1.38489	0.450083	-3.07696	0.0020912	0.00680937	down
A02G105100v1	167.996	-2.37233	0.315418	-7.52124	5.42599e-14	1.05129e-12	down
A02G105200v1	1005.84	-1.23303	0.157445	-7.83149	4.82128e-15	1.0635e-13	down
A02G105800v1	58.1781	-1.41601	0.462558	-3.06126	0.00220406	0.00712797	down
A02G106300v1	413.806	1.09439	0.27459	3.98554	6.73265e-05	0.000319197	up
A02G106400v1	208.287	1.35714	0.209695	6.47196	9.67388e-11	1.24575e-09	up
A02G107000v1	88.1624	-1.25013	0.297169	-4.2068	2.59018e-05	0.000134128	down
A02G107200v1	176.363	-1.41964	0.27264	-5.207	1.91921e-07	1.49921e-06	down
A02G107400v1	57.7714	-1.48302	0.392439	-3.77899	0.000157468	0.000686521	down
A02G107900v1	25.7453	-1.51243	0.594433	-2.54432	0.010949	0.0285895	down
A02G109900v1	12.9174	7.91181	1.58825	4.98148	6.31012e-07	4.50397e-06	up
A02G110000v1	84.8258	1.81518	0.324035	5.6018	2.1214e-08	1.93268e-07	up
A02G110100v1	37.3193	-1.7117	0.451524	-3.79094	0.000150075	0.000657276	down
A02G110400v1	145.887	-1.45828	0.259178	-5.62657	1.83828e-08	1.6923e-07	down
A02G111900v1	146.881	-10.3025	1.20752	-8.53193	1.43926e-17	4.08124e-16	down
A02G112000v1	22.0984	-6.58729	1.27769	-5.15564	2.5277e-07	1.93374e-06	down
A02G112200v1	527.952	1.25921	0.193667	6.50194	7.92899e-11	1.03295e-09	up
A02G113300v1	3.1032	5.85638	2.4741	2.36708	0.0179291	0.0434995	up
A02G113400v1	15.8729	2.01761	0.624237	3.23212	0.00122877	0.00426928	up
A02G113500v1	299.753	-1.16678	0.203865	-5.7233	1.04475e-08	9.99508e-08	down
A02G113600v1	29.735	-2.1245	0.52732	-4.02887	5.6045e-05	0.000270276	down
A02G114100v1	46.7538	-2.218	0.434232	-5.10787	3.25814e-07	2.44299e-06	down
A02G114500v1	12.2251	-2.76735	0.823234	-3.36156	0.000775028	0.00283914	down
A02G114800v1	18.2236	5.35574	1.06091	5.04826	4.45854e-07	3.26618e-06	up
A02G115300v1	335.497	-2.20483	0.25656	-8.5938	8.41399e-18	2.42053e-16	down
A02G115400v1	35.2219	-1.13815	0.458977	-2.47974	0.0131477	0.0333655	down
A02G116000v1	154.06	-2.91011	0.277938	-10.4704	1.18187e-25	6.34569e-24	down
A02G116100v1	47.0026	3.34203	0.58434	5.71932	1.06954e-08	1.02115e-07	up
A02G116400v1	1317.34	3.38169	0.333703	10.1338	3.91005e-24	1.91689e-22	up
A02G116600v1	157.578	1.72422	0.22774	7.57097	3.70443e-14	7.33218e-13	up
A02G116700v1	11.2754	4.6588	1.17163	3.97634	6.99829e-05	0.000330593	up
A02G116800v1	1821.86	3.06493	0.230219	13.3131	1.94316e-40	2.42804e-38	up
A02G117100v1	56.5891	-1.87494	0.363927	-5.15197	2.57767e-07	1.96827e-06	down
A02G117400v1	6.31859	6.87924	1.7002	4.04613	5.20718e-05	0.000252422	up
A02G117600v1	8.23474	2.30677	0.920282	2.50659	0.0121902	0.0312921	up
A02G118300v1	82.7043	-1.04225	0.320323	-3.25373	0.00113899	0.0039944	down
A02G119000v1	5.11559	6.57119	1.8944	3.46875	0.000522894	0.00200049	up
A02G119700v1	34.1936	6.86578	1.1458	5.99212	2.07124e-09	2.20644e-08	up
A02G120100v1	26.013	-2.64078	0.615887	-4.28777	1.80479e-05	9.67504e-05	down
A02G122100v1	32.5429	-1.36011	0.438565	-3.10128	0.00192685	0.00634037	down
A02G122400v1	155.353	1.93529	0.327976	5.90072	3.61914e-09	3.71716e-08	up
A02G123400v1	10.563	-2.78505	0.926636	-3.00555	0.00265101	0.00835945	down
A02G124500v1	35.4829	1.8713	0.484106	3.86547	0.000110876	0.000500648	up
A02G125100v1	51.4216	-1.75663	0.367422	-4.78097	1.7445e-06	1.1469e-05	down
A02G125300v1	157.975	1.90636	0.238915	7.97923	1.47247e-15	3.43411e-14	up
A02G126000v1	105.114	1.16417	0.325038	3.58164	0.000341443	0.00137366	up
A02G126300v1	94.0898	1.05057	0.31015	3.3873	0.000705836	0.00261276	up
A02G126600v1	19.949	-4.47336	0.888541	-5.0345	4.791e-07	3.4881e-06	down
A02G126700v1	90.0946	-9.59742	1.21654	-7.88909	3.04386e-15	6.857e-14	down
A02G126800v1	10.7081	-2.52031	0.865363	-2.91243	0.00358626	0.0108822	down
A02G127800v1	32.2863	1.26629	0.458075	2.76437	0.0057033	0.0163012	up
A02G128600v1	58.2031	-3.98229	0.503295	-7.91245	2.52372e-15	5.7209e-14	down
A02G128800v1	28.2006	-1.78805	0.497758	-3.59221	0.000327886	0.00132536	down
A02G128900v1	650.284	1.04351	0.223307	4.67298	2.9686e-06	1.86835e-05	up
A02G129000v1	505.084	1.47819	0.238746	6.19147	5.96067e-10	6.86739e-09	up
A02G129600v1	17.0165	2.21714	0.633093	3.50208	0.000461642	0.00179282	up
A02G130100v1	14.5684	-6.96889	1.33313	-5.22748	1.7184e-07	1.353e-06	down
A02G131400v1	637.752	1.83607	0.386033	4.75626	1.97213e-06	1.2827e-05	up
A02G131600v1	286.233	1.07315	0.202164	5.30831	1.10644e-07	9.00818e-07	up
A02G132000v1	1516.76	1.01317	0.277694	3.6485	0.000263776	0.00109097	up
A02G132400v1	1.90308	5.1464	2.1853	2.35501	0.0185222	0.0447177	up
A02G132500v1	13.8491	8.0126	1.58486	5.05572	4.28773e-07	3.15156e-06	up
A02G133400v1	19.8275	1.84486	0.558524	3.3031	0.000956208	0.00341852	up
A02G133800v1	4.98648	-4.36559	1.5259	-2.86099	0.00422316	0.012555	down
A02G134700v1	5187.83	2.55576	0.133394	19.1595	8.06105e-82	3.75431e-79	up
A02G134800v1	133.153	2.4912	0.273889	9.09566	9.40114e-20	3.21264e-18	up
A02G135000v1	224.564	1.39135	0.20973	6.63402	3.26667e-11	4.51698e-10	up
A02G135100v1	230.061	2.12387	0.273029	7.77891	7.31538e-15	1.58299e-13	up
A02G135700v1	1113.32	1.34347	0.314131	4.27679	1.89611e-05	0.000101143	up
A02G135800v1	1309.93	1.13893	0.151859	7.49993	6.38532e-14	1.22634e-12	up
A02G135900v1	19.6039	1.43386	0.602398	2.38026	0.0173005	0.0421806	up
A02G136600v1	41.4567	1.01475	0.437655	2.31861	0.020416	0.0485688	up
A02G137100v1	1319.34	-1.42721	0.169656	-8.41239	4.01733e-17	1.09184e-15	down
A02G138700v1	297.041	1.34522	0.234575	5.73469	9.76886e-09	9.38815e-08	up
A02G138800v1	528.151	2.24075	0.288737	7.76052	8.4583e-15	1.81371e-13	up
A02G139300v1	632.78	1.05053	0.211695	4.96247	6.96039e-07	4.92636e-06	up
A02G139400v1	10.107	-6.44136	1.38858	-4.63883	3.50395e-06	2.17676e-05	down
A02G139900v1	20.6046	-2.32316	0.602104	-3.85841	0.000114129	0.000513264	down
A02G140500v1	21.2241	1.60656	0.586649	2.73854	0.00617129	0.0174465	up
A02G141500v1	33.6511	2.11678	0.881716	2.40075	0.0163614	0.0402308	up
A02G141800v1	5.69052	6.72791	1.72452	3.90132	9.56712e-05	0.000438139	up
A02G142600v1	7.63634	3.62432	1.18699	3.05337	0.00226284	0.00729292	up
A02G142700v1	89.3748	-1.32095	0.339636	-3.88932	0.000100526	0.000458188	down
A02G143000v1	113.443	1.86547	0.333124	5.59992	2.14448e-08	1.95168e-07	up
A02G143400v1	95.8149	-1.28425	0.39108	-3.28385	0.001024	0.00363194	down
A02G143900v1	381.954	1.17088	0.229036	5.11218	3.18459e-07	2.39222e-06	up
A02G144100v1	9411.1	2.11513	0.420626	5.02854	4.94216e-07	3.59136e-06	up
A02G144600v1	22.6124	3.73918	0.693101	5.39486	6.85778e-08	5.75479e-07	up
A02G144700v1	23.7968	-1.86375	0.576141	-3.23488	0.00121694	0.00423419	down
A02G144800v1	30.8061	-1.97359	0.507869	-3.88602	0.000101901	0.000463837	down
A02G144900v1	608.139	1.23771	0.159388	7.76537	8.14049e-15	1.74984e-13	up
A02G145300v1	20.1408	2.27624	0.562103	4.04951	5.13249e-05	0.000249254	up
A02G145400v1	3.19378	5.89134	2.01703	2.9208	0.00349133	0.0106308	up
A02G145600v1	35.5474	9.37228	1.52355	6.15161	7.66991e-10	8.68047e-09	up
A02G146200v1	5.93334	-5.67285	1.51888	-3.73489	0.000187797	0.000804265	down
A02G146400v1	81.2824	-1.30416	0.316488	-4.12071	3.77703e-05	0.000188628	down
A02G146700v1	264.851	8.23776	0.627014	13.1381	1.99214e-39	2.39201e-37	up
A02G147100v1	22.2708	-4.00546	0.777252	-5.15336	2.5586e-07	1.95535e-06	down
A02G147400v1	315.16	1.01742	0.185251	5.4921	3.9719e-08	3.45424e-07	up
A02G147600v1	4.09211	6.2538	1.85071	3.37914	0.000727116	0.00267991	up
A02G147900v1	17.3057	-2.93241	0.707845	-4.14274	3.43187e-05	0.000173105	down
A02G148200v1	22.6395	1.96192	0.53106	3.69434	0.000220462	0.000929648	up
A02G150300v1	5.77457	5.28472	1.68235	3.14127	0.00168216	0.00562675	up
A02G150500v1	3.67335	3.57514	1.45791	2.45223	0.0141973	0.0356204	up
A02G152300v1	313.69	2.9089	0.202924	14.3349	1.32418e-46	2.16507e-44	up
A02G152900v1	19.6873	-1.55584	0.562435	-2.76626	0.00567037	0.0162229	down
A02G153200v1	32.5098	-2.30563	0.521442	-4.42164	9.79531e-06	5.55215e-05	down
A02G153400v1	344.947	12.6497	1.45839	8.67376	4.1809e-18	1.23929e-16	up
A02G153800v1	223.197	-10.9062	1.20273	-9.06789	1.21339e-19	4.10316e-18	down
A02G154200v1	306.577	3.37546	0.241375	13.9843	1.94326e-44	2.85121e-42	up
A02G154300v1	708.291	1.26888	0.301761	4.20491	2.61186e-05	0.000135125	up
A02G154900v1	388.251	1.76659	0.332882	5.30694	1.11479e-07	9.07137e-07	up
A02G155200v1	8.72529	-6.22947	1.44051	-4.3245	1.5288e-05	8.30194e-05	down
A02G155600v1	88.5963	-5.49637	0.574051	-9.5747	1.0215e-21	4.12877e-20	down
A02G155900v1	3.49749	6.02351	1.89308	3.18186	0.00146333	0.00497929	up
A02G156000v1	94.5408	-3.36138	0.384943	-8.73215	2.4987e-18	7.58581e-17	down
A02G156100v1	565.893	2.82402	0.182908	15.4396	8.86788e-54	1.86702e-51	up
A02G156600v1	217.661	-1.18155	0.240964	-4.90341	9.41889e-07	6.48749e-06	down
A02G158200v1	647.426	2.8053	0.264148	10.6202	2.40036e-26	1.36258e-24	up
A02G160000v1	280.691	1.35242	0.32185	4.20203	2.64534e-05	0.000136672	up
A02G160500v1	144.781	1.67707	0.244657	6.85476	7.14319e-12	1.0803e-10	up
A02G160600v1	56.8766	2.8986	0.373219	7.76648	8.06945e-15	1.73578e-13	up
A02G160700v1	20999.4	2.35403	0.215812	10.9077	1.05854e-27	6.55459e-26	up
A02G161400v1	113.61	-1.61249	0.407843	-3.9537	7.6951e-05	0.000360161	down
A02G161800v1	16.7886	5.22818	1.12775	4.63593	3.55336e-06	2.205e-05	up
A02G162100v1	83.3092	-1.36919	0.332962	-4.11215	3.91985e-05	0.000195062	down
A02G162200v1	5.06534	6.55944	1.73858	3.77288	0.000161373	0.000701606	up
A02G162300v1	34.1938	6.27745	0.946749	6.63053	3.34481e-11	4.61672e-10	up
A02G162500v1	2370.58	2.0646	0.183951	11.2237	3.12069e-29	2.14358e-27	up
A02G162800v1	13.9312	2.12398	0.735919	2.88616	0.00389972	0.0117091	up
A02G163000v1	2.19991	5.35897	2.1343	2.51087	0.0120432	0.0309704	up
A02G163300v1	215.993	2.2938	0.326185	7.0322	2.033e-12	3.31033e-11	up
A02G164200v1	39.961	-3.17135	0.510965	-6.2066	5.41433e-10	6.28506e-09	down
A02G164600v1	7.01501	5.57083	1.69873	3.27941	0.00104023	0.00368208	up
A02G164700v1	606.027	1.76347	0.307092	5.74248	9.32976e-09	8.98724e-08	up
A02G164800v1	41.7869	-1.16612	0.400483	-2.91179	0.00359363	0.0109007	down
A02G165600v1	97.9298	1.01705	0.305769	3.32622	0.000880326	0.00317567	up
A02G166400v1	1038.59	1.41592	0.170938	8.28323	1.19882e-16	3.10315e-15	up
A02G166500v1	3.4522	6.00957	1.91238	3.14246	0.00167533	0.00560575	up
A02G166600v1	65.2962	-1.18986	0.321755	-3.69802	0.000217289	0.00091778	down
A02G166900v1	6.76748	5.51427	1.67393	3.29421	0.000986978	0.00351686	up
A02G167000v1	148.635	-1.16461	0.284829	-4.08879	4.33637e-05	0.000213903	down
A02G167900v1	55.1836	10.0063	1.48766	6.72616	1.74198e-11	2.49864e-10	up
A02G168100v1	36.6546	9.41544	1.50394	6.26051	3.83717e-10	4.54698e-09	up
A02G168300v1	45.4177	2.09699	0.416908	5.02986	4.90837e-07	3.56993e-06	up
A02G168500v1	518.322	-2.00325	0.206671	-9.69294	3.23088e-22	1.35119e-20	down
A02G168700v1	2875.94	1.53941	0.143925	10.696	1.06306e-26	6.23008e-25	up
A02G169200v1	30.2764	1.98037	0.456708	4.33618	1.44981e-05	7.91891e-05	up
A02G169400v1	196.465	-2.96806	0.25734	-11.5336	8.93124e-31	6.7041e-29	down
A02G169800v1	233.221	1.01654	0.228915	4.44067	8.9679e-06	5.12664e-05	up
A02G170500v1	386.105	1.6565	0.341321	4.85319	1.2149e-06	8.20029e-06	up
A02G171400v1	5.09341	-3.40442	1.38039	-2.46628	0.0136523	0.0344428	down
A02G171500v1	305.769	-2.36498	0.480676	-4.92012	8.64898e-07	6.00874e-06	down
A02G171800v1	3.50837	6.02841	2.2847	2.6386	0.00832483	0.0226044	up
A02G171900v1	2094.63	1.45508	0.14046	10.3594	3.79434e-25	1.96516e-23	up
A02G172700v1	131.469	3.74739	0.353323	10.6061	2.79039e-26	1.5796e-24	up
A02G173000v1	17.6	-2.28705	0.763633	-2.99497	0.00274474	0.00861702	down
A02G173100v1	235.531	1.18973	0.219014	5.43221	5.5659e-08	4.72879e-07	up
A02G173200v1	369.437	2.21005	0.194856	11.3419	8.1329e-30	5.76021e-28	up
A02G173400v1	8.66925	7.33302	1.95845	3.74429	0.000180904	0.000777507	up
A02G174300v1	850.364	1.42203	0.277264	5.1288	2.91594e-07	2.20496e-06	up
A02G174400v1	1003.21	1.20149	0.236489	5.08054	3.7637e-07	2.78772e-06	up
A02G175900v1	1111.73	3.83073	0.543749	7.04503	1.85424e-12	3.03819e-11	up
A02G176000v1	25.5867	-1.58372	0.50523	-3.13466	0.00172053	0.00574106	down
A02G177100v1	122.48	-1.78788	0.316597	-5.64718	1.63103e-08	1.51352e-07	down
A02G177900v1	699.12	-1.18109	0.233486	-5.05849	4.22582e-07	3.10866e-06	down
A02G178000v1	1341.87	1.25874	0.252833	4.97855	6.40627e-07	4.56518e-06	up
A02G178500v1	1603.44	4.03684	0.363881	11.0939	1.34366e-28	8.81581e-27	up
A02G178900v1	22.9048	2.6951	0.591483	4.55652	5.20084e-06	3.12025e-05	up
A02G179600v1	46.5365	-2.27123	0.534661	-4.24799	2.15699e-05	0.000113727	down
A02G179800v1	1092.76	1.34752	0.356973	3.77485	0.000160103	0.000696481	up
A02G180000v1	37.4739	-3.60371	0.593916	-6.06772	1.29741e-09	1.42304e-08	down
A02G180300v1	33.0992	1.31527	0.534498	2.46075	0.0138646	0.0348968	up
A02G180500v1	379.538	4.85547	0.270224	17.9683	3.44989e-72	1.24758e-69	up
A02G180800v1	7.98501	7.21456	1.84641	3.90733	9.33198e-05	0.000428552	up
A02G181000v1	9.42237	-2.03961	0.850541	-2.39802	0.0164841	0.0404872	down
A02G181100v1	12.1862	1.99712	0.7376	2.70759	0.00677738	0.0189216	up
A02G181400v1	147.149	-2.02826	0.272183	-7.45183	9.2055e-14	1.73331e-12	down
A02G181500v1	8.3923	-6.17281	1.44759	-4.26419	2.00631e-05	0.000106513	down
A02G181600v1	116.78	1.55642	0.351901	4.42288	9.73935e-06	5.52196e-05	up
A02G181800v1	342.444	1.14493	0.237203	4.82678	1.3876e-06	9.2875e-06	up
A02G182300v1	6.7528	-3.86974	1.35198	-2.86227	0.00420619	0.0125125	down
A02G182500v1	553.392	-1.40574	0.408981	-3.43717	0.000587836	0.00221912	down
A02G183200v1	15.0721	2.54282	0.759378	3.34856	0.000812331	0.00295606	up
A02G183600v1	230.314	1.07738	0.211579	5.0921	3.54115e-07	2.63846e-06	up
A02G183900v1	63.891	-1.588	0.471017	-3.37142	0.000747813	0.00274943	down
A02G184100v1	20.2944	-1.52371	0.604931	-2.51882	0.0117748	0.0304037	down
A02G184400v1	76.5517	-1.11104	0.337797	-3.28907	0.0010052	0.00357453	down
A02G184700v1	5.82903	-5.64736	1.52762	-3.69683	0.000218306	0.000921696	down
A02G185000v1	105.103	-1.16177	0.408416	-2.84457	0.00444719	0.0131316	down
A02G185300v1	41.0625	1.95371	0.412785	4.73298	2.21246e-06	1.42693e-05	up
A02G185400v1	14.3181	2.34881	0.655169	3.58504	0.000337025	0.00135829	up
A02G186000v1	77.1082	-1.00359	0.367439	-2.73131	0.00630824	0.0177773	down
A02G186100v1	137.431	-1.81663	0.314658	-5.77335	7.771e-09	7.57592e-08	down
A02G186200v1	195.761	1.00654	0.224005	4.49336	7.0107e-06	4.102e-05	up
A02G187000v1	13.1851	2.11653	0.704606	3.00385	0.0026659	0.00839868	up
A02G187600v1	131.339	1.09	0.440609	2.47386	0.0133663	0.0338338	up
A02G190200v1	7.46472	-6.00436	1.47763	-4.0635	4.83428e-05	0.000235777	down
A02G190500v1	39.2186	-1.00544	0.417349	-2.40912	0.0159909	0.0394617	down
A02G190600v1	30.352	-1.39202	0.47788	-2.91291	0.00358074	0.0108686	down
A02G191600v1	25.3817	2.47334	0.81666	3.0286	0.00245686	0.00783584	up
A02G193800v1	23.7874	-3.65761	0.717907	-5.09482	3.49069e-07	2.60371e-06	down
A02G193900v1	83.3841	1.05732	0.301185	3.51055	0.000447178	0.00174204	up
A02G194600v1	252.703	1.05181	0.261995	4.01462	5.95419e-05	0.00028546	up
A02G194800v1	626.127	1.17714	0.179913	6.54283	6.03643e-11	8.01342e-10	up
A02G194900v1	80.6009	1.74043	0.31892	5.45727	4.83503e-08	4.14449e-07	up
A02G195100v1	16.1796	-4.58803	1.03214	-4.44516	8.78252e-06	5.03049e-05	down
A02G195600v1	6.99652	-5.91072	1.47296	-4.01282	5.99985e-05	0.000287537	down
A02G195800v1	324.039	-5.63471	0.355916	-15.8315	1.88521e-56	4.32453e-54	down
A02G196100v1	9.13872	7.41255	1.63664	4.52913	5.92283e-06	3.51635e-05	up
A02G196300v1	17.3694	8.33822	1.54769	5.38753	7.14327e-08	5.97723e-07	up
A02G196400v1	85.5214	-6.31633	0.70819	-8.91899	4.70569e-19	1.52099e-17	down
A02G196500v1	47.5577	-1.02934	0.444546	-2.31548	0.0205865	0.0489177	down
A02G196700v1	38.6427	1.63951	0.503634	3.25535	0.00113251	0.00397349	up
A02G197600v1	79.6237	-9.41916	1.21837	-7.73092	1.06772e-14	2.26034e-13	down
A02G197900v1	71.7941	-1.43502	0.315437	-4.54932	5.38205e-06	3.21829e-05	down
A02G198900v1	29.4872	-1.6599	0.489508	-3.39096	0.000696474	0.00258217	down
A02G199300v1	218.811	1.13747	0.225193	5.05111	4.39258e-07	3.22131e-06	up
A02G199400v1	66.2569	-1.22709	0.335833	-3.65385	0.000258333	0.00107011	down
A02G199500v1	1070.97	2.3031	0.341984	6.73452	1.64476e-11	2.3636e-10	up
A02G199900v1	1354.95	2.30123	0.248544	9.25886	2.06636e-20	7.48576e-19	up
A02G201400v1	939.863	-1.36909	0.294934	-4.64201	3.4503e-06	2.14604e-05	down
A02G202100v1	170.505	1.57388	0.313469	5.02083	5.14494e-07	3.72551e-06	up
A02G203100v1	300.98	-1.0549	0.197023	-5.35421	8.59319e-08	7.11877e-07	down
A02G203500v1	16.9515	4.4873	0.938311	4.78232	1.73286e-06	1.13986e-05	up
A02G204000v1	605.609	2.00528	0.187339	10.704	9.7456e-27	5.72235e-25	up
A02G204100v1	38.4245	1.03476	0.431951	2.39556	0.0165952	0.0407112	up
A02G204200v1	43.1718	-1.23408	0.431639	-2.85905	0.00424906	0.0126205	down
A02G204700v1	8.52509	-6.19602	1.45695	-4.25274	2.11171e-05	0.000111595	down
A02G204800v1	157.476	1.29593	0.257896	5.025	5.03429e-07	3.65227e-06	up
A02G204900v1	513.69	2.25683	0.269767	8.36583	5.96908e-17	1.5941e-15	up
A02G205200v1	71.1822	-1.97728	0.355421	-5.5632	2.64872e-08	2.37093e-07	down
A02G206500v1	276.398	-1.77487	0.23493	-7.55491	4.19159e-14	8.23542e-13	down
A02G207700v1	810.543	-1.25336	0.198987	-6.29871	3.00125e-10	3.61118e-09	down
A02G207800v1	502.251	-1.3294	0.187339	-7.09626	1.28174e-12	2.14124e-11	down
A02G208000v1	54.0671	-1.10712	0.40479	-2.73505	0.00623699	0.0176096	down
A02G209100v1	5.84669	4.27834	1.36967	3.12363	0.00178636	0.00593429	up
A02G209400v1	64.4397	-1.32773	0.380596	-3.48854	0.00048567	0.001875	down
A02G209900v1	72.8066	3.10223	0.382278	8.1151	4.85376e-16	1.19072e-14	up
A02G210100v1	40.9037	3.46275	0.459726	7.53219	4.98973e-14	9.73203e-13	up
A02G210200v1	150.87	1.25291	0.286146	4.37855	1.1947e-05	6.64613e-05	up
A02G210500v1	22529.9	3.46206	0.186497	18.5637	6.32111e-77	2.59068e-74	up
A02G210700v1	11.7017	6.31701	1.72643	3.659	0.000253198	0.00105132	up
A02G210800v1	131.65	-1.66221	0.273468	-6.07825	1.21499e-09	1.33788e-08	down
A02G211100v1	182.349	1.45479	0.368212	3.95097	7.78343e-05	0.000363797	up
A02G211500v1	4.07835	6.25008	1.86459	3.35199	0.00080232	0.0029243	up
A02G211700v1	162.089	1.14361	0.225863	5.06329	4.12091e-07	3.03512e-06	up
A02G211900v1	58.9925	1.2622	0.536935	2.35074	0.018736	0.0451276	up
A02G212000v1	167.182	-1.08642	0.241106	-4.50599	6.60657e-06	3.88737e-05	down
A02G212100v1	6.47745	5.44459	1.863	2.92248	0.00347251	0.010583	up
A02G212200v1	614.798	1.53776	0.220454	6.97542	3.04956e-12	4.84064e-11	up
A02G212400v1	12.6795	1.96017	0.765676	2.56005	0.0104658	0.0275015	up
A02G212700v1	27.843	-2.45326	0.612811	-4.00328	6.24694e-05	0.000298216	down
A03G000200v1	4.6907	-4.26948	1.55107	-2.75261	0.00591219	0.0168037	down
A03G000400v1	3.44724	6.00671	2.23496	2.68762	0.00719633	0.0199391	up
A03G000500v1	45.5963	4.43672	0.511367	8.6762	4.09219e-18	1.21417e-16	up
A03G000600v1	18.7742	2.70517	0.680955	3.97261	7.10884e-05	0.000335172	up
A03G000700v1	107.791	3.11814	0.299946	10.3957	2.5943e-25	1.35852e-23	up
A03G000900v1	15.7012	3.05695	0.685746	4.45785	8.27854e-06	4.77072e-05	up
A03G001100v1	5.70429	6.73043	1.71239	3.93043	8.47927e-05	0.000393063	up
A03G001200v1	13.1156	2.52032	0.727377	3.46495	0.000530333	0.00202517	up
A03G002400v1	2364.62	1.19631	0.137024	8.73063	2.53247e-18	7.68454e-17	up
A03G002500v1	8556.93	2.44595	0.189335	12.9187	3.53242e-38	3.99196e-36	up
A03G002900v1	38.3461	3.56651	0.490386	7.27287	3.5193e-13	6.26031e-12	up
A03G003400v1	15.2413	1.73804	0.683687	2.54216	0.0110168	0.0287341	up
A03G004000v1	86.8926	1.44982	0.291236	4.97815	6.41939e-07	4.57294e-06	up
A03G004700v1	27.5016	-1.59055	0.501336	-3.17262	0.00151072	0.00511819	down
A03G005100v1	75.8978	-1.42142	0.330334	-4.30296	1.68529e-05	9.08114e-05	down
A03G005200v1	153.376	1.42678	0.252728	5.64554	1.64661e-08	1.52705e-07	up
A03G005700v1	72.769	-3.32661	0.418218	-7.95425	1.80217e-15	4.16512e-14	down
A03G006000v1	139.664	-1.52601	0.306279	-4.98242	6.27952e-07	4.48369e-06	down
A03G006400v1	48.8879	-1.16545	0.389134	-2.99498	0.00274462	0.00861702	down
A03G006500v1	44.1537	7.23636	1.09062	6.63508	3.24324e-11	4.48762e-10	up
A03G006600v1	669.406	7.83048	0.563849	13.8875	7.53731e-44	1.08264e-41	up
A03G006800v1	7.96476	-3.47188	1.10272	-3.14847	0.00164126	0.00550823	down
A03G007100v1	574.837	1.14028	0.345263	3.30263	0.000957831	0.00342312	up
A03G007500v1	30.6194	1.65651	0.433726	3.81924	0.000133862	0.000592686	up
A03G007600v1	1537.79	2.1627	0.293154	7.37735	1.61468e-13	2.96493e-12	up
A03G007800v1	22.0527	-2.33818	0.586658	-3.98558	6.7315e-05	0.000319168	down
A03G008600v1	10.1335	3.44109	1.02567	3.35497	0.000793733	0.00289799	up
A03G009200v1	724.884	1.34883	0.244709	5.51197	3.54836e-08	3.1101e-07	up
A03G009900v1	345.631	1.19624	0.247811	4.82722	1.38449e-06	9.26767e-06	up
A03G010300v1	15.4286	2.57365	0.651133	3.95258	7.73146e-05	0.000361615	up
A03G011500v1	18.1641	3.41485	0.683877	4.99337	5.93338e-07	4.25083e-06	up
A03G011800v1	39.1534	7.05804	1.11672	6.32032	2.61019e-10	3.17065e-09	up
A03G012500v1	286.216	-1.67665	0.220712	-7.59657	3.04078e-14	6.09761e-13	down
A03G013000v1	559.071	1.98757	0.253787	7.83168	4.81403e-15	1.06267e-13	up
A03G014100v1	858.769	-1.36911	0.174988	-7.82402	5.11641e-15	1.12578e-13	down
A03G014800v1	39.6838	-1.89149	0.47391	-3.99124	6.57284e-05	0.000312245	down
A03G014900v1	52.0012	-6.33629	0.904231	-7.00738	2.42817e-12	3.91083e-11	down
A03G015000v1	70.4159	-3.21506	0.388334	-8.27912	1.24085e-16	3.2079e-15	down
A03G015100v1	99.2423	-1.3226	0.327096	-4.04345	5.26704e-05	0.000255042	down
A03G015200v1	33.9817	-2.45224	0.578751	-4.23713	2.26396e-05	0.000118766	down
A03G015600v1	154.278	1.80487	0.305118	5.9153	3.31266e-09	3.41813e-08	up
A03G015700v1	3.78344	6.13989	1.99363	3.07974	0.00207178	0.00675758	up
A03G016100v1	200.598	-2.40064	0.601548	-3.99077	6.58597e-05	0.000312774	down
A03G016200v1	28.6114	-2.20906	0.668108	-3.30645	0.000944867	0.00338171	down
A03G016500v1	169.6	-2.07099	0.262845	-7.87913	3.29671e-15	7.39948e-14	down
A03G016800v1	159.556	-1.53468	0.255656	-6.00289	1.9383e-09	2.07273e-08	down
A03G017500v1	49.5128	-1.71844	0.387631	-4.43318	9.28554e-06	5.28709e-05	down
A03G018100v1	10.0994	4.47886	1.11143	4.02982	5.582e-05	0.000269254	up
A03G018200v1	99.3737	3.13759	0.348521	9.0026	2.20429e-19	7.30924e-18	up
A03G018600v1	17.4507	2.66883	0.633381	4.21362	2.5131e-05	0.000130466	up
A03G018800v1	152.759	1.12597	0.295373	3.81205	0.000137821	0.000608679	up
A03G018900v1	27.4396	1.39631	0.49468	2.82266	0.00476273	0.0139388	up
A03G019000v1	210.67	-1.9416	0.368228	-5.27281	1.34347e-07	1.07711e-06	down
A03G019200v1	3.95641	3.69187	1.48553	2.48522	0.0129472	0.0329152	up
A03G019500v1	21.8074	3.22146	0.720304	4.47237	7.73579e-06	4.48105e-05	up
A03G019800v1	15.9155	1.74643	0.649357	2.68948	0.00715629	0.0198487	up
A03G020000v1	7.59649	7.14426	1.66626	4.2876	1.80611e-05	9.68123e-05	up
A03G020100v1	283.162	5.99883	0.389457	15.4031	1.56098e-53	3.25304e-51	up
A03G020300v1	34.7585	-1.56509	0.455393	-3.43679	0.000588649	0.00222178	down
A03G020400v1	332.395	-1.16385	0.222925	-5.22081	1.78141e-07	1.39956e-06	down
A03G020800v1	38.2274	-1.13212	0.433008	-2.61455	0.00893459	0.0240171	down
A03G021000v1	114.543	1.45156	0.291468	4.98016	6.35309e-07	4.53201e-06	up
A03G021200v1	521.975	1.95058	0.303243	6.4324	1.25606e-10	1.59576e-09	up
A03G021800v1	273.983	-1.46539	0.293542	-4.99208	5.97316e-07	4.27687e-06	down
A03G022000v1	34.7352	4.6872	0.669588	7.00013	2.55719e-12	4.1068e-11	up
A03G022100v1	28.1567	9.03453	1.51774	5.95262	2.63889e-09	2.75622e-08	up
A03G022200v1	370.548	-2.09064	0.206052	-10.1462	3.44628e-24	1.69901e-22	down
A03G022300v1	216.126	10.5318	1.46164	7.20546	5.78482e-13	1.0066e-11	up
A03G022600v1	25.8299	-2.98577	0.605976	-4.9272	8.34147e-07	5.81021e-06	down
A03G022800v1	119.025	11.1142	1.4682	7.56993	3.73417e-14	7.38629e-13	up
A03G022900v1	246.048	1.34898	0.228054	5.91517	3.31542e-09	3.41983e-08	up
A03G023200v1	181.199	-2.81391	0.325311	-8.64988	5.15519e-18	1.51567e-16	down
A03G023600v1	16.0273	8.22309	1.65366	4.97265	6.60443e-07	4.6928e-06	up
A03G024200v1	35.3848	-2.03643	0.460142	-4.42565	9.6151e-06	5.45836e-05	down
A03G024400v1	696.382	1.87297	0.309829	6.04517	1.49254e-09	1.62229e-08	up
A03G025800v1	26.5787	-7.83613	1.26896	-6.17522	6.60732e-10	7.56421e-09	down
A03G026700v1	103.797	-1.07664	0.333634	-3.22702	0.00125087	0.00433629	down
A03G027000v1	34.2969	-3.88582	0.596471	-6.51469	7.28392e-11	9.54174e-10	down
A03G027100v1	35.4741	-3.17419	0.532821	-5.95732	2.56401e-09	2.68577e-08	down
A03G027200v1	138.042	2.19133	0.259735	8.43682	3.26084e-17	8.94941e-16	up
A03G027400v1	87.588	6.04816	0.584672	10.3445	4.43088e-25	2.29098e-23	up
A03G027500v1	76.5253	-1.3652	0.329163	-4.1475	3.36127e-05	0.000169809	down
A03G028200v1	171.136	-1.85816	0.565897	-3.28356	0.00102506	0.00363549	down
A03G028800v1	222.905	1.61231	0.266997	6.03869	1.55369e-09	1.68429e-08	up
A03G029700v1	1149.2	-1.04562	0.176334	-5.92977	3.03356e-09	3.1444e-08	down
A03G030300v1	218.935	2.20049	0.272132	8.08612	6.15968e-16	1.49557e-14	up
A03G030400v1	14.0359	-1.7057	0.672755	-2.53539	0.0112323	0.0291916	down
A03G030900v1	881.328	1.1301	0.251317	4.49673	6.90078e-06	4.04501e-05	up
A03G031000v1	229.27	-1.31922	0.349994	-3.76927	0.000163725	0.000710676	down
A03G031300v1	211.809	-1.27663	0.375789	-3.39721	0.000680766	0.00252955	down
A03G031600v1	91.9592	-1.8593	0.313429	-5.93213	2.99021e-09	3.10208e-08	down
A03G031700v1	173.095	7.40062	0.597528	12.3854	3.13575e-35	3.0795e-33	up
A03G031900v1	7.99912	5.76051	1.64393	3.50411	0.000458133	0.00178032	up
A03G032000v1	8.18726	7.2541	1.67336	4.33504	1.45734e-05	7.95391e-05	up
A03G032300v1	141.093	8.91347	1.08098	8.24573	1.64154e-16	4.18047e-15	up
A03G033500v1	29.7768	1.46219	0.624	2.34325	0.0191166	0.0459183	up
A03G033900v1	103.29	-2.43718	0.33262	-7.32721	2.34988e-13	4.25142e-12	down
A03G034100v1	2759.9	1.62528	0.163692	9.92893	3.11575e-23	1.42414e-21	up
A03G034300v1	70.1329	-1.26809	0.32814	-3.86447	0.00011133	0.000502515	down
A03G034500v1	490.551	1.34626	0.187485	7.18061	6.94014e-13	1.19882e-11	up
A03G035000v1	252.225	1.2495	0.222568	5.61402	1.97679e-08	1.80952e-07	up
A03G035100v1	2841.61	-1.19507	0.23562	-5.07203	3.93586e-07	2.90823e-06	down
A03G035700v1	26.7642	2.79985	0.56975	4.91416	8.91629e-07	6.17422e-06	up
A03G036200v1	358.814	1.69824	0.223929	7.58383	3.35499e-14	6.6706e-13	up
A03G036400v1	67.3879	1.31661	0.368506	3.57282	0.000353158	0.00141403	up
A03G036800v1	49.151	3.86883	0.504626	7.66672	1.76448e-14	3.63765e-13	up
A03G037000v1	33.9003	-1.45756	0.489663	-2.97665	0.00291414	0.00907977	down
A03G037200v1	194.527	1.06939	0.241636	4.42564	9.61563e-06	5.45836e-05	up
A03G037300v1	111.255	-1.49699	0.280423	-5.33835	9.37978e-08	7.72977e-07	down
A03G037400v1	34.4701	5.27237	0.711185	7.4135	1.23009e-13	2.28465e-12	up
A03G037600v1	236.787	-1.17504	0.293366	-4.00539	6.19165e-05	0.000295827	down
A03G037700v1	173.115	-1.88131	0.325321	-5.78294	7.34076e-09	7.17583e-08	down
A03G038500v1	49.7892	-1.32235	0.365956	-3.61342	0.000302181	0.00123174	down
A03G039000v1	384.868	1.65432	0.208377	7.93909	2.03678e-15	4.67763e-14	up
A03G039200v1	315.668	1.50288	0.187658	8.00857	1.16051e-15	2.73875e-14	up
A03G040200v1	42.5157	-1.29529	0.419356	-3.08876	0.00200996	0.00658387	down
A03G040400v1	243.463	-2.17767	0.293736	-7.41368	1.22843e-13	2.28226e-12	down
A03G040900v1	77.6897	3.77267	0.457789	8.24107	1.70682e-16	4.34133e-15	up
A03G041100v1	19.2129	-1.83596	0.590937	-3.10686	0.00189085	0.00624162	down
A03G041200v1	1191.03	1.45654	0.246202	5.91601	3.29835e-09	3.40452e-08	up
A03G041300v1	38.6288	-1.01665	0.393198	-2.58558	0.0097214	0.0258049	down
A03G041400v1	50.7881	1.46816	0.497171	2.95302	0.00314679	0.00972088	up
A03G041800v1	34.5224	2.23915	0.505467	4.42987	9.42889e-06	5.36226e-05	up
A03G042600v1	60.7631	3.53923	0.454205	7.79214	6.58811e-15	1.43267e-13	up
A03G042700v1	87.3179	-4.60987	0.462413	-9.96916	2.07972e-23	9.67134e-22	down
A03G042800v1	343.393	-2.11954	0.37518	-5.64939	1.61018e-08	1.4953e-07	down
A03G042900v1	66.4086	-2.11973	0.367463	-5.76854	7.99601e-09	7.78664e-08	down
A03G043000v1	165.787	1.67791	0.272847	6.14963	7.76628e-10	8.77984e-09	up
A03G043200v1	78.0479	-1.08728	0.370201	-2.93701	0.00331394	0.0101728	down
A03G043400v1	450.459	1.29554	0.198172	6.53745	6.25766e-11	8.29457e-10	up
A03G043500v1	454.825	1.83076	0.192857	9.4928	2.24915e-21	8.76241e-20	up
A03G044000v1	2.82013	5.71823	2.03459	2.81051	0.00494628	0.0144021	up
A03G044300v1	19.1957	3.02859	0.757456	3.99837	6.37791e-05	0.000303997	up
A03G044700v1	296.228	1.90958	0.272717	7.00206	2.52217e-12	4.0548e-11	up
A03G045000v1	98.0129	2.37387	0.411895	5.76329	8.24911e-09	8.0128e-08	up
A03G045100v1	63.7816	-1.16151	0.333953	-3.47805	0.000505082	0.00194032	down
A03G045200v1	31.2474	3.48445	0.566387	6.15206	7.64827e-10	8.65757e-09	up
A03G046900v1	773.744	2.85975	0.251708	11.3614	6.50964e-30	4.65341e-28	up
A03G047000v1	116.742	-3.25625	0.351673	-9.2593	2.05772e-20	7.45888e-19	down
A03G047100v1	47.0552	-2.56656	0.469067	-5.47163	4.45914e-08	3.8475e-07	down
A03G047300v1	33.1777	-1.23066	0.455452	-2.70205	0.0068913	0.0192034	down
A03G047400v1	145	1.06702	0.230491	4.62935	3.6682e-06	2.26871e-05	up
A03G047600v1	583.294	1.02437	0.208311	4.91751	8.76511e-07	6.08049e-06	up
A03G048100v1	19.5786	5.46244	0.966094	5.65415	1.56618e-08	1.45752e-07	up
A03G048200v1	50.3375	1.15861	0.391849	2.95679	0.00310863	0.00961651	up
A03G048300v1	66.1004	-1.57351	0.344414	-4.56867	4.90831e-06	2.96035e-05	down
A03G048700v1	95.6841	1.00984	0.314687	3.20904	0.00133179	0.00458193	up
A03G048800v1	193.115	1.41338	0.294762	4.79498	1.6269e-06	1.07499e-05	up
A03G049000v1	157.557	-1.16666	0.260329	-4.48148	7.41258e-06	4.31373e-05	down
A03G050100v1	22.1196	-3.99938	0.747566	-5.34986	8.80199e-08	7.28095e-07	down
A03G050200v1	2.74381	-4.55964	1.955	-2.3323	0.0196848	0.0470881	down
A03G050600v1	217.935	1.48069	0.509805	2.90444	0.00367915	0.01113	up
A03G050700v1	1086.9	-1.7578	0.41587	-4.22681	2.37031e-05	0.00012388	down
A03G050800v1	110.702	1.17777	0.283843	4.14939	3.3337e-05	0.000168596	up
A03G051000v1	77.5694	1.31661	0.367765	3.58004	0.000343536	0.00138073	up
A03G051400v1	54.1586	-1.7372	0.407941	-4.25846	2.05843e-05	0.000108988	down
A03G051700v1	50.2803	1.20338	0.374462	3.21363	0.00131068	0.00451587	up
A03G051900v1	211.195	4.01584	0.299098	13.4265	4.22927e-41	5.48529e-39	up
A03G052000v1	295.537	3.32962	0.238773	13.9447	3.38743e-44	4.93481e-42	up
A03G052300v1	4.72817	6.46146	1.90819	3.38618	0.000708739	0.00262145	up
A03G052400v1	247.111	-1.10231	0.234514	-4.7004	2.59646e-06	1.65344e-05	down
A03G052500v1	145.689	4.67966	0.402076	11.6387	2.61838e-31	2.02224e-29	up
A03G052600v1	26.4853	-1.65947	0.500114	-3.31819	0.000906044	0.00325793	down
A03G052900v1	2929.18	-1.36836	0.357401	-3.82865	0.000128848	0.000572546	down
A03G053900v1	155.024	1.14325	0.354641	3.2237	0.00126546	0.00438046	up
A03G054300v1	198.677	-2.93333	0.270857	-10.8298	2.48699e-27	1.51229e-25	down
A03G054600v1	24.0701	4.73983	0.791217	5.99055	2.09128e-09	2.22508e-08	up
A03G055000v1	9.31822	2.36344	0.831701	2.84169	0.00448753	0.0132338	up
A03G055200v1	203.265	-1.05819	0.222301	-4.76017	1.93431e-06	1.25993e-05	down
A03G055400v1	13.0666	3.04602	0.815138	3.73682	0.000186366	0.000798523	up
A03G055500v1	15.4032	3.47668	0.814107	4.27054	1.95001e-05	0.000103765	up
A03G055800v1	5.05351	-5.44136	1.57453	-3.45586	0.00054855	0.00208722	down
A03G056300v1	9.67022	1.90012	0.819668	2.31816	0.0204408	0.048624	up
A03G056900v1	183.754	1.03935	0.280999	3.69876	0.000216654	0.000915664	up
A03G057000v1	11.635	4.6987	1.04853	4.48124	7.42105e-06	4.31744e-05	up
A03G057100v1	26.0209	1.64137	0.532396	3.08298	0.0020494	0.0066963	up
A03G058000v1	21.7644	-1.97967	0.568466	-3.48248	0.000496796	0.00191219	down
A03G058100v1	139.119	-6.16537	0.558391	-11.0413	2.41505e-28	1.5612e-26	down
A03G058200v1	22.5142	-2.73886	0.729116	-3.75641	0.000172369	0.000744363	down
A03G058800v1	902.562	8.50609	0.441717	19.2569	1.23631e-82	5.84651e-80	up
A03G059000v1	3.16721	5.88193	1.99419	2.94953	0.00318261	0.00981132	up
A03G059100v1	30.7263	9.16009	1.50877	6.07125	1.26917e-09	1.3938e-08	up
A03G059200v1	118.603	-2.2315	0.30016	-7.43437	1.05067e-13	1.96987e-12	down
A03G059300v1	163.846	1.33868	0.241251	5.54891	2.87453e-08	2.56075e-07	up
A03G059400v1	31.9771	1.66896	0.55087	3.02968	0.00244816	0.00781197	up
A03G060100v1	123.072	1.56483	0.305568	5.12107	3.03814e-07	2.292e-06	up
A03G060300v1	40.4212	5.77668	0.822369	7.02444	2.14927e-12	3.48722e-11	up
A03G061800v1	75.1233	-1.06944	0.356489	-2.99991	0.0027006	0.00849189	down
A03G062000v1	9.92725	-5.40704	1.3807	-3.91617	8.99679e-05	0.000414459	down
A03G062700v1	27.8267	2.93352	0.531784	5.51637	3.46077e-08	3.03919e-07	up
A03G062900v1	1340.06	-1.53195	0.15051	-10.1784	2.47556e-24	1.22932e-22	down
A03G063000v1	166.28	11.5965	1.46898	7.89426	2.92049e-15	6.58873e-14	up
A03G063300v1	4.8178	6.4848	2.12626	3.04986	0.00228951	0.00736886	up
A03G063800v1	121.331	-2.18818	0.314426	-6.95929	3.41996e-12	5.39376e-11	down
A03G064300v1	237.323	1.0199	0.209971	4.85733	1.18981e-06	8.03977e-06	up
A03G064400v1	30.7922	-1.6831	0.461421	-3.64765	0.000264653	0.00109408	down
A03G064900v1	406.265	-1.33373	0.466046	-2.86181	0.00421229	0.0125289	down
A03G065600v1	131.594	4.21398	0.39181	10.7552	5.60351e-27	3.34453e-25	up
A03G065800v1	711.329	1.33291	0.18832	7.07788	1.46374e-12	2.42944e-11	up
A03G066100v1	7.8863	-2.58155	0.973133	-2.65283	0.0079821	0.0218154	down
A03G066200v1	128.325	2.55967	0.363346	7.04473	1.85827e-12	3.04318e-11	up
A03G066300v1	5.22376	-2.75755	1.18867	-2.31987	0.0203479	0.0484311	down
A03G066500v1	1171.58	2.04411	0.157247	12.9994	1.23316e-38	1.4331e-36	up
A03G066600v1	52.0852	9.92265	1.48563	6.67907	2.40465e-11	3.38362e-10	up
A03G066700v1	8.18696	-3.03033	1.0475	-2.89293	0.00381671	0.0114941	down
A03G066900v1	923.708	1.48242	0.54394	2.72535	0.00642342	0.0180646	up
A03G067300v1	33.7814	-1.20406	0.470184	-2.56082	0.0104425	0.0274548	down
A03G067900v1	11.4937	2.84151	0.924376	3.07397	0.00211229	0.00686965	up
A03G068200v1	107.434	-2.43499	0.355879	-6.84218	7.79967e-12	1.17295e-10	down
A03G068300v1	1865.07	3.67566	0.262308	14.0128	1.30215e-44	1.92433e-42	up
A03G069500v1	16.1637	6.78491	1.54758	4.38422	1.16403e-05	6.48964e-05	up
A03G069800v1	13.949	1.58803	0.664056	2.39142	0.0167834	0.041109	up
A03G070100v1	3.78732	-5.02531	1.69555	-2.96383	0.00303833	0.00942465	down
A03G070900v1	94.1314	-4.92762	0.480768	-10.2495	1.18973e-24	6.01984e-23	down
A03G071700v1	2.81161	-4.59566	1.86186	-2.46831	0.0135752	0.0342779	down
A03G074200v1	56.9427	-6.04631	0.797572	-7.5809	3.43159e-14	6.81849e-13	down
A03G074300v1	13.3619	2.93931	0.722642	4.06746	4.75291e-05	0.000232306	up
A03G074400v1	7.00918	2.63654	1.02721	2.5667	0.010267	0.0270558	up
A03G074500v1	4.96963	-4.36074	1.54722	-2.81843	0.00482585	0.0141054	down
A03G075200v1	62.5044	1.26895	0.394133	3.21961	0.00128365	0.00443618	up
A03G075300v1	147.943	-3.96394	0.341763	-11.5985	4.19205e-31	3.2094e-29	down
A03G075600v1	179.246	-1.32254	0.280159	-4.7207	2.35039e-06	1.50814e-05	down
A03G075800v1	3132.52	1.52218	0.178769	8.51477	1.66923e-17	4.703e-16	up
A03G076200v1	20.6717	1.35767	0.544732	2.49237	0.0126895	0.0323631	up
A03G076300v1	71.347	1.1213	0.333073	3.36654	0.000761186	0.00279259	up
A03G076500v1	45.3887	-1.09445	0.437264	-2.50295	0.0123165	0.0315675	down
A03G076600v1	11812.9	1.7897	0.173551	10.3122	6.20383e-25	3.18093e-23	up
A03G076800v1	281.643	-1.14967	0.254314	-4.52067	6.16438e-06	3.64576e-05	down
A03G077200v1	11.4683	1.98071	0.727958	2.72091	0.00651031	0.0182764	up
A03G078000v1	7.32377	2.70592	0.945621	2.86153	0.00421606	0.0125383	up
A03G078100v1	55.0552	2.06425	0.526052	3.92405	8.70737e-05	0.000402605	up
A03G078200v1	4.71826	6.45938	1.82322	3.54285	0.000395826	0.00156379	up
A03G078700v1	203.798	4.10651	0.314417	13.0607	5.5207e-39	6.56472e-37	up
A03G079000v1	2.53799	-4.44739	1.92429	-2.31118	0.0208228	0.0494123	down
A03G079500v1	8.78328	-4.28126	1.28505	-3.33158	0.00086356	0.00312105	down
A03G079700v1	21.7321	-2.08268	0.569841	-3.65484	0.000257347	0.00106646	down
A03G079800v1	169.853	1.19379	0.216682	5.50942	3.60025e-08	3.15334e-07	up
A03G080000v1	38.1356	1.0359	0.433093	2.39187	0.016763	0.0410721	up
A03G080600v1	331.296	-1.16199	0.34684	-3.35022	0.00080748	0.00294032	down
A03G080900v1	30.5028	2.00315	0.604188	3.31544	0.00091499	0.00328683	up
A03G081000v1	305.255	1.10825	0.308701	3.59006	0.000330607	0.00133557	up
A03G081300v1	33.8852	-2.45357	0.511955	-4.79255	1.64672e-06	1.0868e-05	down
A03G081400v1	178.733	1.28942	0.227433	5.66948	1.43234e-08	1.34191e-07	up
A03G082200v1	37.3252	1.62861	0.412626	3.94694	7.91563e-05	0.00036947	up
A03G082500v1	34.6449	1.5238	0.405512	3.75772	0.000171467	0.000740674	up
A03G083000v1	39.9163	-1.59123	0.404427	-3.93452	8.33625e-05	0.00038728	down
A03G083300v1	14.5893	-2.26208	0.734702	-3.07891	0.00207763	0.00677269	down
A03G083900v1	34.4556	-2.6475	0.515033	-5.14046	2.74073e-07	2.08195e-06	down
A03G084200v1	10.1144	2.64296	0.858905	3.07713	0.00209007	0.00680641	up
A03G084900v1	373.916	1.32559	0.300185	4.41591	1.00587e-05	5.68675e-05	up
A03G085200v1	47.4167	2.89725	0.493197	5.87442	4.24327e-09	4.30823e-08	up
A03G085400v1	2.92996	-4.65455	1.84866	-2.5178	0.0118089	0.0304622	down
A03G086500v1	45.3478	-4.48236	0.679264	-6.59884	4.14379e-11	5.64475e-10	down
A03G086700v1	319	-1.05668	0.242768	-4.35262	1.34521e-05	7.39577e-05	down
A03G086800v1	416.821	-1.47794	0.283902	-5.20581	1.93148e-07	1.50792e-06	down
A03G087100v1	103.803	7.14808	0.705595	10.1306	4.04254e-24	1.97869e-22	up
A03G087300v1	500.269	1.36496	0.206787	6.60081	4.08926e-11	5.57418e-10	up
A03G087900v1	5.70429	6.73043	1.71239	3.93043	8.47927e-05	0.000393063	up
A03G088400v1	147.138	1.8826	0.313424	6.00656	1.89505e-09	2.03142e-08	up
A03G088700v1	122.057	-2.13848	0.281029	-7.60948	2.75195e-14	5.54331e-13	down
A03G089400v1	30.7501	4.67811	0.882969	5.29816	1.16976e-07	9.47722e-07	up
A03G089600v1	22.8226	-7.61652	1.2849	-5.92769	3.07223e-09	3.18234e-08	down
A03G089700v1	29.412	2.2101	0.557017	3.96775	7.25546e-05	0.000341482	up
A03G089800v1	43.7443	-1.36307	0.389205	-3.50219	0.000461442	0.00179227	down
A03G091300v1	47.0189	-1.9348	0.493964	-3.91689	8.96997e-05	0.000413369	down
A03G091500v1	26.1372	8.9281	1.6045	5.56443	2.63018e-08	2.3557e-07	up
A03G091600v1	282.099	-1.37334	0.579475	-2.36997	0.0177897	0.0432122	down
A03G091700v1	190.734	-1.40387	0.406031	-3.45755	0.000545102	0.00207551	down
A03G091800v1	10.3948	-3.44256	0.991502	-3.47206	0.000516474	0.00197906	down
A03G092300v1	10.197	6.11491	1.61009	3.79787	0.000145946	0.000640744	up
A03G092700v1	263.395	12.2602	1.46998	8.3404	7.40411e-17	1.95525e-15	up
A03G092800v1	25.0263	1.16571	0.476478	2.44651	0.0144245	0.0361079	up
A03G092900v1	133.342	1.00428	0.266323	3.7709	0.00016266	0.000706751	up
A03G093200v1	53.1186	9.95047	1.48095	6.71899	1.82992e-11	2.61745e-10	up
A03G093700v1	161.98	1.11346	0.232575	4.78753	1.68846e-06	1.11256e-05	up
A03G094000v1	15.4707	-7.05544	1.3203	-5.34381	9.10114e-08	7.51306e-07	down
A03G094900v1	82.9934	-1.06038	0.333456	-3.17996	0.00147294	0.00500673	down
A03G095200v1	11.549	-2.43281	0.893211	-2.72366	0.00645623	0.0181444	down
A03G095900v1	261.709	1.14855	0.312849	3.67127	0.000241351	0.00100734	up
A03G096300v1	2.49674	5.54332	2.19232	2.52852	0.0114545	0.029695	up
A03G096600v1	49.2214	-2.06354	0.421946	-4.89053	1.00565e-06	6.89385e-06	down
A03G097100v1	74.9117	-2.88821	0.389942	-7.40676	1.2942e-13	2.39578e-12	down
A03G097200v1	274.579	12.3206	1.45752	8.45312	2.83628e-17	7.84372e-16	up
A03G097800v1	27.0705	-2.20279	0.537457	-4.09853	4.15778e-05	0.00020592	down
A03G097900v1	6.93238	3.92055	1.1506	3.40739	0.000655869	0.0024465	up
A03G098200v1	103.026	1.12353	0.287567	3.90703	9.34394e-05	0.000429037	up
A03G098400v1	73.3672	-1.88522	0.32417	-5.81554	6.04367e-09	5.98689e-08	down
A03G098900v1	9.28196	3.6051	1.11356	3.23746	0.00120598	0.00420105	up
A03G099800v1	824.23	1.11278	0.184637	6.02687	1.67165e-09	1.80675e-08	up
A03G100000v1	34.825	-5.31616	0.823452	-6.45594	1.0755e-10	1.37862e-09	down
A03G100200v1	6.63318	6.94941	1.67506	4.14876	3.34287e-05	0.000168977	up
A03G100300v1	718.883	1.08458	0.303853	3.56942	0.00035777	0.00143036	up
A03G100400v1	481.046	1.10645	0.220732	5.01262	5.36929e-07	3.8729e-06	up
A03G100700v1	7.58869	-6.02783	1.44983	-4.15762	3.21574e-05	0.000163127	down
A03G101300v1	3836.2	1.37817	0.158096	8.71731	2.8489e-18	8.57699e-17	up
A03G101800v1	214.194	1.02956	0.231559	4.4462	8.74017e-06	5.00904e-05	up
A03G102200v1	188.525	-1.15179	0.297444	-3.87227	0.000107825	0.00048827	down
A03G103000v1	80.3617	3.4984	0.344835	10.1451	3.48279e-24	1.71564e-22	up
A03G104100v1	7.20311	-4.92627	1.44913	-3.39946	0.00067519	0.00251159	down
A03G104700v1	10.8495	7.65699	1.74552	4.38666	1.15106e-05	6.42898e-05	up
A03G104900v1	100.551	-3.7458	0.373178	-10.0376	1.04212e-23	4.95868e-22	down
A03G105700v1	311.532	1.3721	0.223375	6.14257	8.11954e-10	9.15731e-09	up
A03G106000v1	11.1721	-1.72821	0.730104	-2.36708	0.0179292	0.0434995	down
A03G106800v1	37.0739	-2.32395	0.47253	-4.9181	8.73877e-07	6.06564e-06	down
A03G107000v1	34.2959	-3.01342	0.571506	-5.27277	1.34381e-07	1.07724e-06	down
A03G107100v1	68.1759	1.39551	0.417589	3.34183	0.000832294	0.0030203	up
A03G107300v1	8.88526	7.36935	1.63445	4.50876	6.52087e-06	3.84062e-05	up
A03G107400v1	68.9861	8.88346	1.48518	5.98138	2.21253e-09	2.34436e-08	up
A03G107500v1	26.7228	7.50995	1.54094	4.87361	1.09578e-06	7.45768e-06	up
A03G107600v1	436.623	10.5463	1.07997	9.7653	1.58636e-22	6.77724e-21	up
A03G107800v1	37.395	6.99011	1.14258	6.11786	9.48421e-10	1.05915e-08	up
A03G107900v1	163.349	10.1275	1.46683	6.90438	5.04228e-12	7.76514e-11	up
A03G108100v1	39.4175	4.58092	0.601147	7.6203	2.53087e-14	5.12653e-13	up
A03G108500v1	88.4921	9.24238	1.47037	6.28573	3.2632e-10	3.90371e-09	up
A03G108600v1	41.2397	8.13852	1.48638	5.47539	4.3655e-08	3.77253e-07	up
A03G108800v1	34.1892	9.31437	1.50019	6.20881	5.33865e-10	6.20072e-09	up
A03G109000v1	5.36313	6.64328	1.73485	3.82932	0.000128499	0.000571328	up
A03G109300v1	120.331	-1.3032	0.466851	-2.79147	0.00524687	0.015168	down
A03G109500v1	22.2869	4.01918	0.814021	4.93744	7.91534e-07	5.54416e-06	up
A03G109700v1	105.899	-1.20245	0.278635	-4.31549	1.59248e-05	8.61498e-05	down
A03G109900v1	116.131	1.53023	0.273756	5.58975	2.27391e-08	2.06002e-07	up
A03G110000v1	63.0062	-1.5679	0.359129	-4.36583	1.26638e-05	7.0075e-05	down
A03G110500v1	37.5485	-2.49675	0.495672	-5.03709	4.7265e-07	3.44483e-06	down
A03G111300v1	606.612	1.016	0.31384	3.23733	0.00120654	0.00420238	up
A03G111600v1	71.1596	-1.27386	0.348082	-3.65966	0.000252548	0.00104905	down
A03G111900v1	96.5247	1.36701	0.285669	4.7853	1.70735e-06	1.12416e-05	up
A03G112900v1	1215.16	1.07047	0.224283	4.77285	1.81635e-06	1.18994e-05	up
A03G113300v1	530.317	1.2773	0.317326	4.02519	5.69293e-05	0.000274175	up
A03G113700v1	14.7257	2.60644	0.731752	3.56191	0.000368165	0.0014671	up
A03G113800v1	23.7547	-1.33602	0.501292	-2.66516	0.00769507	0.0211428	down
A03G114500v1	542.579	2.59721	0.190372	13.6429	2.22671e-42	3.02188e-40	up
A03G114900v1	4.62978	3.92496	1.48415	2.64458	0.00817918	0.0222797	up
A03G115000v1	24.6601	3.40189	0.725784	4.6872	2.76972e-06	1.7554e-05	up
A03G115300v1	36261.4	6.54429	0.173821	37.6497	0	0	up
A03G115600v1	361.413	2.92431	0.190701	15.3345	4.49524e-53	9.24394e-51	up
A03G116100v1	92.1053	10.744	1.50185	7.15382	8.43985e-13	1.44408e-11	up
A03G116700v1	92.8507	-1.48838	0.344837	-4.31618	1.5875e-05	8.58956e-05	down
A03G116800v1	22.4246	3.47615	0.626025	5.55274	2.81223e-08	2.50816e-07	up
A03G117900v1	124.395	1.92667	0.258778	7.44524	9.677e-14	1.8193e-12	up
A03G118000v1	428.554	1.04274	0.217042	4.80432	1.55277e-06	1.02966e-05	up
A03G118400v1	160.991	1.27366	0.234076	5.44124	5.29124e-08	4.50914e-07	up
A03G118700v1	745.79	1.03282	0.157299	6.56595	5.1701e-11	6.94281e-10	up
A03G119100v1	16.1709	-2.44567	0.710568	-3.44186	0.000577734	0.00218676	down
A03G119400v1	21.6863	-1.47777	0.527924	-2.7992	0.0051229	0.0148529	down
A03G119600v1	95.645	1.26245	0.278458	4.53374	5.79494e-06	3.44541e-05	up
A03G120200v1	108.645	1.83467	0.2791	6.57353	4.91349e-11	6.61846e-10	up
A03G120600v1	124.531	2.05515	0.402484	5.10616	3.28767e-07	2.46423e-06	up
A03G120800v1	34.581	-1.26717	0.507801	-2.49541	0.0125811	0.0321294	down
A03G121700v1	242.266	2.27631	0.250893	9.07284	1.1595e-19	3.93174e-18	up
A03G122000v1	55.5189	1.32289	0.365164	3.62273	0.000291506	0.00119306	up
A03G122900v1	70.8154	-1.6009	0.332287	-4.81782	1.45134e-06	9.67723e-06	down
A03G123200v1	6878.1	6.95472	0.19962	34.8398	6.07213e-266	9.33241e-262	up
A03G123300v1	707.698	3.35725	0.299428	11.2122	3.55136e-29	2.43126e-27	up
A03G123700v1	104.347	-1.82629	0.292134	-6.25154	4.06436e-10	4.80232e-09	down
A03G124400v1	122.908	2.5888	0.31298	8.27146	1.32326e-16	3.40234e-15	up
A03G124500v1	230.814	-1.10848	0.228516	-4.85075	1.22998e-06	8.29571e-06	down
A03G124700v1	141.588	1.35741	0.387652	3.50163	0.000462427	0.0017953	up
A03G125500v1	15.0049	3.60508	0.754747	4.77653	1.78342e-06	1.17061e-05	up
A03G126100v1	4.50628	-5.27545	1.71424	-3.07743	0.00208791	0.00680046	down
A03G126200v1	16.3336	-7.13382	1.31394	-5.42934	5.65633e-08	4.79965e-07	down
A03G126700v1	105.737	-1.96522	0.311049	-6.31804	2.64898e-10	3.21396e-09	down
A03G127300v1	25.0426	1.61565	0.482145	3.35096	0.000805331	0.0029336	up
A03G127400v1	142.703	-4.34679	0.357008	-12.1756	4.19196e-34	3.78984e-32	down
A03G127800v1	22.3853	-7.58843	1.28176	-5.92031	3.21343e-09	3.32132e-08	down
A03G127900v1	130.752	-1.44143	0.510838	-2.82169	0.00477708	0.0139775	down
A03G128200v1	8.16914	-3.02702	1.0866	-2.78578	0.00533995	0.0154037	down
A03G129000v1	117.285	1.38449	0.27889	4.96427	6.89586e-07	4.88631e-06	up
A03G129600v1	247.377	-1.50987	0.209891	-7.1936	6.31061e-13	1.09469e-11	down
A03G129900v1	20.3761	1.32665	0.523749	2.53299	0.0113093	0.0293596	up
A03G130200v1	7.39002	-2.46351	1.01622	-2.42419	0.0153424	0.038097	down
A03G131000v1	10.2987	5.11417	1.21984	4.19249	2.75909e-05	0.000141906	up
A03G131100v1	4.69805	-5.33561	1.67537	-3.18474	0.00144885	0.00493578	down
A03G131400v1	121.491	-1.18342	0.283221	-4.17842	2.93543e-05	0.000150247	down
A03G132300v1	64.3978	2.6881	0.396635	6.77726	1.22478e-11	1.79318e-10	up
A03G133100v1	4.43423	6.36737	1.81154	3.51489	0.00043993	0.00171696	up
A03G133600v1	3774.95	1.56914	0.143969	10.8991	1.1635e-27	7.19604e-26	up
A03G133700v1	909.699	3.5399	0.233784	15.1418	8.58586e-52	1.69177e-49	up
A03G134600v1	7.26385	3.99516	1.20724	3.30933	0.000935202	0.0033514	up
A03G134900v1	161.482	2.85313	0.271241	10.5188	7.07544e-26	3.84935e-24	up
A03G135400v1	11.1052	-6.57704	1.37431	-4.78571	1.70382e-06	1.12208e-05	down
A03G136300v1	2.52331	5.55562	1.99471	2.78518	0.00534977	0.0154248	up
A03G136600v1	61.5629	-1.22711	0.334715	-3.66614	0.00024624	0.00102485	down
A03G137400v1	84.0849	1.5742	0.370396	4.25005	2.13726e-05	0.000112773	up
A03G137500v1	19.5687	2.60694	0.74922	3.47954	0.000502277	0.00193051	up
A03G137600v1	166.497	1.74581	0.28993	6.02149	1.72819e-09	1.86295e-08	up
A03G138900v1	25.5563	-1.50298	0.504877	-2.97693	0.00291153	0.009073	down
A03G139000v1	113.273	-1.09589	0.281636	-3.89115	9.97697e-05	0.000455179	down
A03G139300v1	342.291	1.26773	0.268127	4.7281	2.26633e-06	1.45846e-05	up
A03G139400v1	33.9289	3.79478	0.63899	5.93872	2.87257e-09	2.98811e-08	up
A03G140600v1	16.6842	3.15086	0.725353	4.3439	1.39973e-05	7.67398e-05	up
A03G140700v1	186.975	-1.11348	0.235527	-4.72763	2.27157e-06	1.46123e-05	down
A03G140800v1	304.596	-1.76436	0.221113	-7.97946	1.46976e-15	3.42913e-14	down
A03G141000v1	19.2091	2.64371	0.611312	4.32466	1.52769e-05	8.29765e-05	up
A03G141300v1	513.592	1.2102	0.209218	5.78437	7.27846e-09	7.11945e-08	up
A03G142600v1	39.7737	-8.41776	1.2427	-6.77379	1.25454e-11	1.83413e-10	down
A03G142700v1	938.089	2.32782	0.180261	12.9136	3.77041e-38	4.25309e-36	up
A03G143000v1	5.4848	-5.55897	1.63884	-3.39203	0.000693773	0.00257322	down
A03G143500v1	10.6279	-2.26591	0.830294	-2.72905	0.00635177	0.0178893	down
A03G143600v1	40.6282	3.39407	0.515336	6.58614	4.51408e-11	6.11799e-10	up
A03G144200v1	16.195	2.97367	0.730018	4.07341	4.63289e-05	0.000227013	up
A03G144400v1	5.30214	6.62794	2.21699	2.98962	0.00279326	0.00874791	up
A03G144600v1	18.0142	8.39054	1.54646	5.42565	5.77444e-08	4.89176e-07	up
A03G145100v1	96.0664	1.25982	0.298625	4.21875	2.45665e-05	0.000127924	up
A03G145800v1	4.05178	6.24151	2.03985	3.05979	0.00221494	0.00716072	up
A03G146000v1	568.874	1.44908	0.181302	7.99266	1.32062e-15	3.09759e-14	up
A03G146400v1	23.4708	2.07451	0.516737	4.01462	5.95404e-05	0.00028546	up
A03G146700v1	13.9108	1.79702	0.664312	2.70509	0.00682863	0.0190527	up
A03G147000v1	1293.69	1.04123	0.206615	5.0395	4.66761e-07	3.40675e-06	up
A03G147400v1	50.315	-1.01148	0.367243	-2.75424	0.0058829	0.016729	down
A03G148100v1	213.236	-1.1536	0.389206	-2.96399	0.00303681	0.00942091	down
A03G148800v1	34.1124	-1.96287	0.459632	-4.27053	1.95009e-05	0.000103765	down
A03G149300v1	48.3334	2.97164	0.656829	4.52422	6.0619e-06	3.59196e-05	up
A03G149500v1	35.6665	-2.47608	0.479993	-5.15858	2.48832e-07	1.90598e-06	down
A03G149700v1	79.3425	10.5294	1.472	7.15312	8.48252e-13	1.45097e-11	up
A03G149800v1	14.7896	3.09436	0.891323	3.47165	0.000517266	0.00198168	up
A03G150000v1	40.7579	-1.57783	0.443231	-3.55983	0.000371094	0.00147805	down
A03G150100v1	8.84589	7.36463	1.62858	4.52212	6.1223e-06	3.62532e-05	up
A03G150700v1	141.775	1.68702	0.252088	6.69221	2.19825e-11	3.1189e-10	up
A03G151000v1	2549.36	2.7563	0.257487	10.7046	9.68403e-27	5.69164e-25	up
A03G151100v1	74.6504	-1.33308	0.359029	-3.71301	0.000204806	0.000870271	down
A03G151500v1	76.94	-2.36217	0.339471	-6.95839	3.44182e-12	5.42545e-11	down
A03G151900v1	75.2472	1.00355	0.357829	2.80456	0.00503858	0.0146326	up
A03G152100v1	247.992	1.50408	0.268496	5.60189	2.12033e-08	1.93199e-07	up
A03G152600v1	23.3648	2.02067	0.730314	2.76685	0.00566012	0.0161966	up
A03G153000v1	622.058	2.39936	0.356327	6.73359	1.65526e-11	2.37814e-10	up
A03G153100v1	27.4506	-1.5697	0.560389	-2.8011	0.00509292	0.0147757	down
A03G153300v1	2.20087	5.35954	2.11052	2.53944	0.0111031	0.0289024	up
A03G153500v1	80.6964	10.5535	1.47322	7.16357	7.86004e-13	1.35013e-11	up
A03G154400v1	344.161	-1.43476	0.23244	-6.17258	6.71855e-10	7.67582e-09	down
A03G155600v1	485.791	-1.06716	0.213599	-4.99607	5.85114e-07	4.19536e-06	down
A03G156000v1	13.7386	-1.96277	0.793225	-2.47442	0.0133453	0.0337919	down
A03G156100v1	22.7159	2.0696	0.5814	3.55968	0.000371311	0.00147872	up
A03G156300v1	18.0287	1.46667	0.635874	2.30654	0.0210805	0.0499427	up
A03G156700v1	139.702	-1.46821	0.284083	-5.16824	2.36308e-07	1.81707e-06	down
A03G157400v1	21.4379	-2.05954	0.593719	-3.46888	0.00052263	0.0019999	down
A03G157500v1	96.302	2.17983	0.293058	7.4382	1.02063e-13	1.91472e-12	up
A03G157600v1	99.1078	1.35108	0.476819	2.83352	0.00460388	0.0135315	up
A03G157700v1	710.748	1.61035	0.17687	9.10471	8.64963e-20	2.96407e-18	up
A03G157800v1	100.446	-1.37032	0.374466	-3.6594	0.000252809	0.00104992	down
A03G158000v1	53.3841	-1.38134	0.442825	-3.11937	0.00181237	0.00600934	down
A03G158300v1	1411.47	2.88472	0.314652	9.16797	4.82021e-20	1.69333e-18	up
A03G158600v1	108.872	-2.06613	0.31462	-6.56706	5.13199e-11	6.89767e-10	down
A03G158800v1	1036.36	-5.30316	0.21865	-24.2541	5.98282e-130	7.82565e-127	down
A03G158900v1	482.849	-3.08635	0.212736	-14.5079	1.08045e-47	1.84509e-45	down
A03G159800v1	3.14257	5.87361	1.92882	3.04518	0.00232541	0.00746445	up
A03G160000v1	134.315	-1.81641	0.259255	-7.00628	2.44738e-12	3.9397e-11	down
A03G160200v1	18.705	1.34412	0.555049	2.42162	0.0154515	0.0383229	up
A03G160400v1	170.056	1.33088	0.341518	3.89694	9.74145e-05	0.000445326	up
A03G161000v1	41.2068	-1.97703	0.42671	-4.63319	3.60078e-06	2.23128e-05	down
A03G161600v1	427.615	1.4866	0.280356	5.30253	1.14206e-07	9.27609e-07	up
A03G162300v1	60.5087	4.75454	0.482797	9.84792	6.99804e-23	3.07959e-21	up
A03G162400v1	132.727	1.1946	0.405976	2.94254	0.00325536	0.0100085	up
A03G163100v1	29.9641	-1.82619	0.590768	-3.09121	0.00199346	0.00653506	down
A03G163700v1	20.2395	-4.49042	0.894295	-5.02118	5.13539e-07	3.71903e-06	down
A03G164400v1	5.1593	5.11883	1.83745	2.78583	0.00533909	0.015402	up
A03G164800v1	29.0623	3.65593	0.582303	6.2784	3.4207e-10	4.08259e-09	up
A03G164900v1	13.8126	2.99072	0.891519	3.35463	0.00079471	0.00290078	up
A03G165100v1	16.7537	1.77838	0.739099	2.40614	0.016122	0.0397343	up
A03G165300v1	22.2946	3.72653	0.647797	5.75262	8.78715e-09	8.50051e-08	up
A03G165500v1	3.19378	5.89134	2.01703	2.9208	0.00349133	0.0106308	up
A03G165900v1	19.8109	1.68689	0.570227	2.95829	0.00309355	0.00957471	up
A03G166000v1	308.788	1.04257	0.331178	3.14806	0.00164358	0.00551512	up
A03G166300v1	8.7966	7.3583	1.68075	4.378	1.19775e-05	6.66132e-05	up
A03G166400v1	33.6391	-1.03824	0.429458	-2.41756	0.0156252	0.038695	down
A03G166600v1	27.9381	-2.25729	0.636215	-3.548	0.000388173	0.0015384	down
A03G166900v1	542.539	3.4197	0.398813	8.57469	9.93518e-18	2.84616e-16	up
A03G167000v1	1372.7	1.65913	0.313031	5.3002	1.15677e-07	9.38316e-07	up
A03G167100v1	5.08344	-3.39488	1.44364	-2.3516	0.0186927	0.0450567	down
A03G167600v1	121.231	2.84731	0.343234	8.29555	1.08088e-16	2.81327e-15	up
A03G168000v1	29.6316	-1.81695	0.4826	-3.76492	0.000166606	0.00072206	down
A03G168100v1	14323.9	1.88658	0.227289	8.30036	1.03799e-16	2.70507e-15	up
A03G168900v1	151.327	-1.16172	0.266115	-4.36549	1.26839e-05	7.0167e-05	down
A03G169400v1	5.04509	-5.43909	1.58672	-3.42788	0.000608307	0.00228909	down
A03G169700v1	167.074	2.01757	0.262631	7.68212	1.56476e-14	3.25099e-13	up
A03G169900v1	16.1396	8.2315	1.54771	5.31852	1.04613e-07	8.55795e-07	up
A03G170300v1	116.73	-1.62806	0.424374	-3.83637	0.000124865	0.00055662	down
A03G171300v1	1390.12	-1.23853	0.251922	-4.91631	8.81896e-07	6.11439e-06	down
A03G171800v1	10.6144	2.06602	0.722293	2.86037	0.00423148	0.0125762	up
A03G171900v1	11.0934	1.93474	0.749719	2.58061	0.00986249	0.0261287	up
A03G172000v1	2859.69	1.78636	0.269226	6.63514	3.24192e-11	4.48762e-10	up
A03G172500v1	64.4253	-1.17139	0.473253	-2.4752	0.0133163	0.0337378	down
A03G172700v1	25.9628	1.95886	0.499519	3.92149	8.80046e-05	0.000406298	up
A03G172800v1	16.2944	-2.83377	0.772661	-3.66754	0.000244891	0.00101993	down
A03G174200v1	29.1993	2.03759	0.583008	3.49497	0.000474122	0.00183537	up
A03G174600v1	169.068	2.02917	0.612828	3.31115	0.000929124	0.00333254	up
A03G174700v1	1465.12	1.13593	0.231839	4.89964	9.60118e-07	6.5972e-06	up
A03G174900v1	24.644	-2.13008	0.679235	-3.136	0.00171272	0.0057187	down
A03G175400v1	275.041	1.51055	0.301977	5.00221	5.66779e-07	4.07197e-06	up
A03G175600v1	78.9356	-1.41919	0.599475	-2.36738	0.0179144	0.0434739	down
A03G175700v1	83.6229	-3.90864	0.420621	-9.29255	1.50633e-20	5.51876e-19	down
A03G175900v1	119.457	5.58383	1.39303	4.00839	6.11329e-05	0.000292586	up
A03G176000v1	211.649	-1.48367	0.240561	-6.16752	6.93695e-10	7.90918e-09	down
A03G176100v1	9.32869	-6.32576	1.40486	-4.50276	6.70765e-06	3.94088e-05	down
A03G176200v1	31.1616	-8.06584	1.26526	-6.37485	1.83145e-10	2.27423e-09	down
A03G176400v1	13.0992	-6.8156	1.35628	-5.0252	5.0291e-07	3.64893e-06	down
A03G176600v1	14.6348	8.0889	1.60597	5.03675	4.73493e-07	3.45015e-06	up
A03G176900v1	6.50585	3.04536	1.02367	2.97493	0.00293052	0.00912802	up
A03G177000v1	31.9857	-4.12452	0.671137	-6.14557	7.96776e-10	8.99934e-09	down
A03G177300v1	9.95176	-6.41871	1.40946	-4.55403	5.26289e-06	3.15409e-05	down
A03G178300v1	143.158	-1.114	0.288389	-3.86285	0.000112073	0.000505534	down
A03G178700v1	165.286	1.3529	0.359637	3.76186	0.000168654	0.000729805	up
A03G179200v1	45.4566	1.09859	0.448211	2.45106	0.0142436	0.0357161	up
A03G179400v1	145.866	-1.80734	0.31623	-5.71527	1.0953e-08	1.04348e-07	down
A03G179500v1	4.45392	6.37267	1.92916	3.30333	0.000955429	0.00341613	up
A03G180400v1	43.417	-8.54413	1.23985	-6.89125	5.53033e-12	8.47651e-11	down
A03G180500v1	380.925	1.2018	0.226628	5.30295	1.13949e-07	9.25638e-07	up
A03G180700v1	22.2191	-3.76575	0.728983	-5.16576	2.39459e-07	1.83923e-06	down
A03G180900v1	88.9327	1.44121	0.288606	4.99371	5.92315e-07	4.24403e-06	up
A03G181500v1	3.9989	3.71153	1.49177	2.488	0.0128463	0.0326952	up
A03G181800v1	3.14945	5.87597	1.91588	3.06698	0.00216237	0.00700806	up
A03G183000v1	26.383	-1.12673	0.48068	-2.34404	0.0190763	0.0458322	down
A03G183600v1	12.7237	3.36268	0.84538	3.97771	6.95822e-05	0.000329054	up
A03G183900v1	58.4861	1.38906	0.404326	3.43549	0.000591487	0.00223194	up
A03G184300v1	196.797	-1.46742	0.244044	-6.01291	1.82219e-09	1.95776e-08	down
A03G184400v1	435.878	1.68213	0.437481	3.84504	0.000120533	0.000539067	up
A03G184700v1	71.1058	1.05142	0.314943	3.33846	0.000842442	0.0030537	up
A03G185200v1	39.4379	1.72805	0.422939	4.08581	4.39228e-05	0.000216435	up
A03G185500v1	25.5071	-7.77676	1.27196	-6.11397	9.71827e-10	1.08469e-08	down
A03G185800v1	30.4431	-2.17328	0.512375	-4.24159	2.21943e-05	0.000116689	down
A03G185900v1	175.05	1.47813	0.242571	6.09359	1.10406e-09	1.22274e-08	up
A03G186600v1	38.0544	-1.43578	0.491664	-2.92025	0.00349754	0.0106476	down
A03G186700v1	25.8084	1.38504	0.480399	2.8831	0.00393779	0.0118118	up
A03G186800v1	30.241	-2.42071	0.531755	-4.55231	5.30613e-06	3.1766e-05	down
A03G188400v1	307.382	1.91535	0.231369	8.27836	1.2488e-16	3.22572e-15	up
A03G188600v1	25.3911	3.79523	0.714139	5.31442	1.06999e-07	8.73573e-07	up
A03G188700v1	21.5808	3.20854	0.753351	4.25902	2.05325e-05	0.000108732	up
A03G190400v1	73.0976	3.90331	0.39812	9.80436	1.07833e-22	4.66518e-21	up
A03G190900v1	205.998	-1.10317	0.216164	-5.10339	3.33628e-07	2.4958e-06	down
A03G191000v1	472.924	-6.09955	0.331954	-18.3747	2.0964e-75	8.20894e-73	down
A03G191100v1	13.1111	-5.8187	1.35771	-4.28568	1.82184e-05	9.75963e-05	down
A03G191200v1	200.512	1.86545	0.377621	4.94	7.8121e-07	5.47747e-06	up
A03G192500v1	18.4146	-1.75462	0.656522	-2.6726	0.00752665	0.0207357	down
A03G192700v1	217.756	-2.14391	0.608991	-3.52043	0.000430848	0.0016859	down
A03G193500v1	145.612	-1.01167	0.332806	-3.03983	0.00236709	0.00758517	down
A03G193700v1	110.968	-1.24267	0.283508	-4.38318	1.16959e-05	6.51824e-05	down
A03G193900v1	15.2447	4.66327	0.959099	4.86213	1.16128e-06	7.86729e-06	up
A03G194200v1	26.1718	1.97945	0.509049	3.88853	0.000100854	0.000459444	up
A03G194300v1	25.4126	-3.09545	0.596489	-5.18944	2.10926e-07	1.6354e-06	down
A03G194800v1	44.5439	9.69678	1.48613	6.52485	6.80717e-11	8.96496e-10	up
A03G195100v1	130.921	-3.57965	0.391811	-9.13618	6.47e-20	2.23985e-18	down
A03G195400v1	790.589	-1.32385	0.164933	-8.02655	1.00248e-15	2.38227e-14	down
A03G196800v1	2.81722	-4.59838	1.84474	-2.4927	0.0126778	0.0323439	down
A03G197500v1	35.3565	-2.16117	0.521616	-4.14322	3.42458e-05	0.000172766	down
A03G197600v1	58.0971	-2.08616	0.373686	-5.58265	2.36876e-08	2.13776e-07	down
A03G197800v1	10.1622	7.56289	1.62405	4.65682	3.21137e-06	2.00717e-05	up
A03G198000v1	4043.86	2.13948	0.173833	12.3077	8.23833e-35	7.82794e-33	up
A03G198600v1	25.9614	-1.46245	0.503088	-2.90695	0.00364976	0.0110509	down
A03G199600v1	3.03147	-4.7036	1.85194	-2.53982	0.011091	0.0288856	down
A03G199800v1	22.9535	4.95026	0.839428	5.89718	3.69756e-09	3.79237e-08	up
A03G200300v1	11.6175	-2.94458	0.848824	-3.46901	0.000522378	0.00199939	down
A03G200400v1	910.103	-1.85312	0.503854	-3.67789	0.00023517	0.000984512	down
A03G200800v1	841.522	1.21827	0.208531	5.84214	5.15338e-09	5.14978e-08	up
A03G201200v1	252.477	4.52663	0.36052	12.5559	3.69187e-36	3.77645e-34	up
A03G201400v1	121.193	3.15102	0.604534	5.21231	1.86506e-07	1.4608e-06	up
A03G201500v1	35.4732	2.79834	0.702304	3.98451	6.76192e-05	0.000320289	up
A03G201600v1	900.302	1.00056	0.288716	3.46555	0.000529148	0.00202103	up
A03G203600v1	255.471	1.03482	0.198393	5.21599	1.82835e-07	1.43424e-06	up
A03G204400v1	1098.06	2.30156	0.35303	6.51943	7.05746e-11	9.26481e-10	up
A03G204800v1	142.742	-2.0356	0.2573	-7.91138	2.54554e-15	5.76756e-14	down
A03G204900v1	55.631	1.13662	0.326887	3.47711	0.000506858	0.00194629	up
A03G205500v1	177.257	-1.40805	0.476813	-2.95306	0.00314643	0.00972067	down
A03G205700v1	446.8	1.63331	0.183273	8.9119	5.01655e-19	1.61637e-17	up
A03G205800v1	44.0172	9.67882	1.49153	6.48921	8.62868e-11	1.12125e-09	up
A03G206600v1	1266.34	1.03703	0.17772	5.83518	5.37334e-09	5.35392e-08	up
A03G206700v1	1.89124	5.13986	2.18565	2.35164	0.0186906	0.0450553	up
A03G207200v1	220.367	-1.52215	0.39555	-3.84818	0.000118997	0.00053301	down
A03G207300v1	254.818	-5.22509	0.392439	-13.3144	1.90935e-40	2.39553e-38	down
A03G208200v1	34.3509	-4.44853	0.685799	-6.48663	8.7778e-11	1.13775e-09	down
A03G208300v1	113.617	-3.58581	0.362476	-9.89256	4.48426e-23	2.00786e-21	down
A03G208400v1	1072.45	-1.41576	0.297186	-4.76388	1.8991e-06	1.23847e-05	down
A03G208800v1	15.3553	-2.18938	0.683321	-3.20402	0.00135522	0.00465289	down
A03G209000v1	448.275	1.39261	0.230527	6.041	1.53161e-09	1.66153e-08	up
A03G209500v1	435.331	1.82479	0.264043	6.91094	4.81444e-12	7.43102e-11	up
A03G209600v1	82.2763	1.51352	0.304153	4.97617	6.48556e-07	4.6158e-06	up
A03G209900v1	52.7405	-8.82493	1.23537	-7.14355	9.09538e-13	1.55106e-11	down
A03G210000v1	20.3086	1.77958	0.555444	3.2039	0.00135581	0.00465468	up
A03G210500v1	66.1022	2.51621	0.515862	4.87768	1.07342e-06	7.32092e-06	up
A03G210800v1	71.5144	-5.35409	0.599908	-8.92485	4.46291e-19	1.44327e-17	down
A03G211300v1	90.7901	-1.60403	0.297857	-5.38524	7.23481e-08	6.04971e-07	down
A03G211600v1	1193.13	1.70333	0.201006	8.47405	2.37014e-17	6.60811e-16	up
A03G212200v1	5.87347	-4.61794	1.50361	-3.07123	0.00213176	0.00692492	down
A03G213200v1	715.645	1.08574	0.166691	6.5135	7.34196e-11	9.61162e-10	up
A03G213800v1	268.489	-1.09911	0.204417	-5.37679	7.58268e-08	6.3294e-07	down
A03G213900v1	8.54323	3.18556	1.00306	3.17586	0.00149394	0.00506972	up
A03G214300v1	31.1675	-1.56955	0.490349	-3.20088	0.0013701	0.00469717	down
A03G215100v1	494.294	1.78746	0.213187	8.38448	5.0951e-17	1.36962e-15	up
A03G215300v1	422.917	1.51516	0.199891	7.57994	3.45721e-14	6.86717e-13	up
A03G215400v1	116.317	-1.06575	0.401473	-2.6546	0.00794025	0.0217116	down
A03G216100v1	34.9068	2.22423	0.606013	3.67028	0.000242289	0.00101067	up
A03G216200v1	755.303	-1.08662	0.220439	-4.92934	8.2507e-07	5.75284e-06	down
A03G216400v1	1458.18	2.57193	0.279751	9.19365	3.7974e-20	1.34477e-18	up
A03G217300v1	223.527	2.37197	0.227478	10.4273	1.86173e-25	9.85821e-24	up
A03G217500v1	28.0824	-2.55445	0.630214	-4.0533	5.04999e-05	0.000245557	down
A03G218000v1	221.818	12.0124	1.46067	8.2239	1.96983e-16	4.99379e-15	up
A03G218200v1	91.4567	-1.6151	0.315145	-5.12494	2.97639e-07	2.24818e-06	down
A03G218300v1	347.722	1.09597	0.184616	5.93646	2.9124e-09	3.02493e-08	up
A03G219100v1	5.37768	-5.53059	1.60453	-3.44686	0.000567136	0.00215075	down
A03G219200v1	348.556	1.79533	0.224221	8.00697	1.17565e-15	2.77131e-14	up
A03G219300v1	40.3528	-1.81283	0.516918	-3.50701	0.000453179	0.00176329	down
A03G219400v1	204.744	3.15926	0.353878	8.92755	4.35563e-19	1.41081e-17	up
A03G219500v1	32.2698	-1.39598	0.464095	-3.00797	0.00263003	0.0083031	down
A03G219800v1	55.6402	2.04154	0.457885	4.45863	8.24834e-06	4.75376e-05	up
A03G219900v1	928.933	2.10619	0.319576	6.59058	4.38102e-11	5.9534e-10	up
A03G220000v1	86.7501	-1.17942	0.355503	-3.3176	0.00090793	0.00326338	down
A03G220200v1	49.1491	4.09392	0.483702	8.46373	2.58968e-17	7.19412e-16	up
A03G220600v1	3897.6	1.17583	0.165776	7.09291	1.31324e-12	2.19028e-11	up
A03G220900v1	79.6657	1.46646	0.298566	4.91166	9.0307e-07	6.2457e-06	up
A03G221000v1	115.863	3.09919	0.312743	9.9097	3.77795e-23	1.71281e-21	up
A03G221700v1	4.10632	3.11726	1.31662	2.36763	0.0179026	0.0434521	up
A03G222000v1	4.26957	-5.19829	1.64956	-3.15132	0.00162535	0.00546168	down
A03G222100v1	156.922	-1.62234	0.295307	-5.49374	3.93514e-08	3.42422e-07	down
A03G222500v1	41.2761	2.72248	0.469473	5.79901	6.67083e-09	6.5585e-08	up
A03G223800v1	14.5437	-1.77261	0.685079	-2.58745	0.0096688	0.0256875	down
A03G223900v1	15.8412	2.82645	0.817246	3.4585	0.000543188	0.00206925	up
A03G224100v1	189.691	3.07006	0.466089	6.58685	4.49246e-11	6.09138e-10	up
A03G224300v1	263.185	-1.58663	0.351437	-4.51469	6.34104e-06	3.74367e-05	down
A03G224500v1	385.277	-1.2011	0.32811	-3.66065	0.000251571	0.00104563	down
A03G224600v1	94.8933	1.37075	0.280888	4.88007	1.06048e-06	7.24149e-06	up
A03G225100v1	139.385	2.52454	0.286289	8.81816	1.16356e-18	3.63293e-17	up
A03G225700v1	224.124	1.85102	0.292673	6.32453	2.53999e-10	3.09088e-09	up
A03G226000v1	167.055	-2.51917	0.418115	-6.02507	1.69039e-09	1.82572e-08	down
A03G226100v1	3204.73	3.04232	0.390889	7.78307	7.07827e-15	1.53438e-13	up
A03G226600v1	800.01	3.33388	0.164604	20.254	3.27526e-91	2.03387e-88	up
A03G226700v1	7.48394	2.33784	0.977332	2.39207	0.0167537	0.0410526	up
A03G227000v1	18.0619	2.73172	0.648206	4.21427	2.50585e-05	0.000130156	up
A03G227400v1	752.668	1.2108	0.173396	6.98286	2.8924e-12	4.60067e-11	up
A03G227700v1	74.2985	-1.20946	0.460128	-2.62852	0.00857562	0.0231972	down
A03G228700v1	596.611	1.03197	0.17919	5.75908	8.45741e-09	8.20347e-08	up
A03G229200v1	17.7938	-3.17998	0.711143	-4.47165	7.76171e-06	4.49479e-05	down
A03G229900v1	36.4836	-4.14504	0.684389	-6.05656	1.39065e-09	1.51826e-08	down
A03G230300v1	65.2177	3.64511	0.434977	8.38002	5.29202e-17	1.41945e-15	up
A03G231400v1	1243.33	1.95328	0.165338	11.8139	3.3098e-32	2.72027e-30	up
A03G231500v1	819.704	2.50677	0.254088	9.86577	5.85859e-23	2.59674e-21	up
A03G231700v1	217.254	3.71582	0.409415	9.07594	1.12696e-19	3.82774e-18	up
A03G232400v1	30.8117	-1.22468	0.486863	-2.51546	0.0118877	0.0306257	down
A03G232500v1	287.903	1.74037	0.195506	8.90189	5.4906e-19	1.76264e-17	up
A03G233100v1	36.0445	-1.09775	0.443888	-2.47304	0.0133968	0.0338984	down
A03G233900v1	26896	2.07366	0.142508	14.5512	5.73925e-48	9.91102e-46	up
A03G234000v1	3884.28	-1.0512	0.338572	-3.1048	0.00190406	0.00627983	down
A03G234300v1	569.193	2.59728	0.39473	6.5799	4.70756e-11	6.36759e-10	up
A03G234700v1	276.719	-1.54123	0.222937	-6.91331	4.73486e-12	7.3192e-11	down
A03G235100v1	358.861	1.61784	0.195834	8.2613	1.44096e-16	3.68494e-15	up
A03G235300v1	1590.55	-1.0813	0.210368	-5.14005	2.74664e-07	2.08618e-06	down
A03G235400v1	57.282	2.2835	0.403153	5.66411	1.47787e-08	1.38078e-07	up
A03G235900v1	135.335	-1.42972	0.276993	-5.16156	2.44897e-07	1.87795e-06	down
A03G236100v1	15.6357	8.18453	1.69925	4.81656	1.46053e-06	9.73111e-06	up
A03G236400v1	64.6298	-5.39919	0.650725	-8.29719	1.06606e-16	2.77587e-15	down
A03G238200v1	4.04446	-4.03989	1.71494	-2.35569	0.0184881	0.0446792	down
A03G238500v1	667.894	1.07123	0.281844	3.8008	0.00014423	0.000633932	up
A03G239700v1	285.332	1.91952	0.20955	9.16017	5.1815e-20	1.81299e-18	up
A03G239800v1	357.498	1.33853	0.202444	6.61185	3.79556e-11	5.20151e-10	up
A03G240800v1	893.36	2.562	0.273442	9.36946	7.29049e-21	2.74127e-19	up
A03G240900v1	363.8	2.33597	0.22309	10.471	1.17434e-25	6.31625e-24	up
A03G241200v1	195.791	1.69076	0.266767	6.33796	2.32828e-10	2.8479e-09	up
A03G241400v1	42.513	2.30718	0.494887	4.66203	3.13101e-06	1.96073e-05	up
A03G241500v1	23.2162	5.71397	1.0768	5.30644	1.11785e-07	9.09505e-07	up
A03G241600v1	27.2202	4.93212	1.06459	4.63289	3.60597e-06	2.23427e-05	up
A03G241700v1	3.43251	6.00235	2.05262	2.92424	0.00345294	0.0105296	up
A03G242000v1	12.7538	2.47883	0.726573	3.41168	0.000645643	0.00241437	up
A03G242100v1	130.506	1.67825	0.55784	3.00848	0.00262557	0.00829157	up
A03G242900v1	97.6762	1.93413	0.35162	5.50061	3.78476e-08	3.3013e-07	up
A03G243100v1	11.1024	-6.57669	1.37288	-4.79045	1.66408e-06	1.09743e-05	down
A03G243300v1	32.0389	9.22218	1.58473	5.8194	5.90592e-09	5.85799e-08	up
A03G243400v1	10.6554	7.63494	1.71343	4.45593	8.35306e-06	4.8096e-05	up
A03G243700v1	18.5272	2.77078	1.04192	2.65931	0.00783011	0.0214611	up
A03G243800v1	17.611	8.35939	1.5698	5.32513	1.00879e-07	8.26675e-07	up
A03G245200v1	523.523	-1.02284	0.181251	-5.64325	1.66873e-08	1.54594e-07	down
A03G246300v1	34.4533	-1.25394	0.441368	-2.84102	0.00449691	0.0132549	down
A03G246400v1	390.762	-1.08894	0.217669	-5.00271	5.65287e-07	4.06253e-06	down
A03G246500v1	116.027	-5.4727	0.522064	-10.4828	1.03617e-25	5.59268e-24	down
A03G246600v1	58.574	-3.40004	0.454382	-7.48277	7.27739e-14	1.38554e-12	down
A03G246700v1	23.861	1.9093	0.502138	3.80233	0.000143339	0.000630423	up
A03G247000v1	334.687	1.4343	0.240763	5.95729	2.56454e-09	2.68586e-08	up
A03G247400v1	7.34833	5.6376	1.64438	3.42841	0.000607131	0.00228522	up
A03G247600v1	101.638	-1.12983	0.303912	-3.71763	0.000201104	0.000855706	down
A03G247800v1	156.191	1.68652	0.2848	5.92176	3.18522e-09	3.29383e-08	up
A03G248100v1	99.603	-1.42052	0.287414	-4.94241	7.71621e-07	5.4158e-06	down
A03G248700v1	81.6959	-1.63108	0.388645	-4.19685	2.70658e-05	0.000139416	down
A03G249600v1	21.1458	8.62213	1.5693	5.49426	3.92341e-08	3.41594e-07	up
A03G249800v1	45.214	-1.84739	0.423831	-4.35878	1.30789e-05	7.20862e-05	down
A03G250000v1	5.67832	3.63208	1.43095	2.53822	0.0111417	0.0289917	up
A03G250100v1	9.01043	3.54867	0.947411	3.74565	0.000179926	0.000774004	up
A03G250500v1	1.89028	5.13929	2.18566	2.35137	0.0187047	0.0450661	up
A03G250600v1	86.1563	1.9268	0.303627	6.34594	2.21077e-10	2.70956e-09	up
A03G250700v1	23.022	-6.64744	1.28378	-5.17802	2.24253e-07	1.73065e-06	down
A03G251600v1	1490.55	1.63596	0.147616	11.0825	1.52498e-28	9.96295e-27	up
A03G251700v1	47.6136	3.51134	0.58967	5.95476	2.60459e-09	2.72456e-08	up
A03G252000v1	16.2805	2.15227	0.794105	2.71031	0.00672211	0.0187963	up
A03G252300v1	13.8697	-2.53494	0.779591	-3.25163	0.00114746	0.0040195	down
A03G252900v1	230.156	1.11936	0.318403	3.51554	0.000438855	0.00171375	up
A03G253300v1	52.9366	4.36441	0.600454	7.26852	3.63434e-13	6.44816e-12	up
A03G254200v1	50.6591	-1.58694	0.574411	-2.76273	0.00573201	0.0163718	down
A03G255300v1	107.972	-1.19333	0.308921	-3.86289	0.000112053	0.000505481	down
A03G255400v1	191.908	-1.14379	0.258248	-4.42904	9.46536e-06	5.3815e-05	down
A03G255600v1	396.133	-2.19659	0.197955	-11.0964	1.30545e-28	8.58344e-27	down
A03G255700v1	39.4103	3.76578	0.560081	6.72364	1.77238e-11	2.54047e-10	up
A03G255800v1	63.4426	2.88432	0.45826	6.29406	3.09266e-10	3.71633e-09	up
A03G256100v1	2403.6	1.86489	0.244396	7.6306	2.33658e-14	4.74862e-13	up
A03G257600v1	16.2393	-3.79843	0.84492	-4.49561	6.93707e-06	4.06472e-05	down
A03G257900v1	41.7075	2.33794	0.486305	4.80756	1.5278e-06	1.01474e-05	up
A03G259200v1	696.949	-1.27757	0.217339	-5.87821	4.1473e-09	4.22125e-08	down
A03G260400v1	67.8532	2.60821	0.440825	5.91666	3.28543e-09	3.39345e-08	up
A03G260500v1	5.94458	-5.67541	1.52536	-3.72071	0.000198664	0.000846379	down
A03G261300v1	215.169	1.01982	0.227933	4.47421	7.6695e-06	4.44935e-05	up
A03G262200v1	340.785	-2.04283	0.207417	-9.84891	6.92932e-23	3.05372e-21	down
A03G262400v1	257.103	-1.02458	0.429758	-2.3841	0.0171211	0.0418095	down
A03G263000v1	3.16129	5.87987	1.91646	3.06809	0.00215434	0.00698646	up
A03G263300v1	49.7354	1.28685	0.405493	3.17355	0.00150586	0.00510396	up
A03G263500v1	4.43919	6.36845	1.78581	3.56613	0.000362286	0.00144672	up
A04G000100v1	117.183	-1.32651	0.306018	-4.33476	1.45917e-05	7.96187e-05	down
A04G000500v1	3.7111	-4.99552	1.72959	-2.88827	0.00387366	0.0116439	down
A04G000600v1	2.8088	-4.59429	1.87583	-2.44921	0.0143172	0.0358846	down
A04G001100v1	110.043	-3.70378	0.384481	-9.63317	5.79131e-22	2.37672e-20	down
A04G001200v1	49.7399	-1.76777	0.446786	-3.95664	7.60106e-05	0.000356248	down
A04G002100v1	290.086	-1.01133	0.21405	-4.72474	2.30408e-06	1.4809e-05	down
A04G003200v1	131.375	3.46339	0.368448	9.39993	5.45978e-21	2.07448e-19	up
A04G003500v1	4.10103	-4.06257	1.59564	-2.54604	0.0108954	0.0284834	down
A04G004100v1	27.3785	-5.99058	1.12029	-5.34734	8.92576e-08	7.37737e-07	down
A04G004200v1	37.1182	-3.59353	0.578241	-6.2146	5.14555e-10	5.99116e-09	down
A04G005100v1	6.94739	-3.91466	1.34401	-2.91266	0.00358363	0.0108759	down
A04G006000v1	7.37167	7.09916	1.98742	3.57204	0.000354206	0.00141748	up
A04G006400v1	67.5231	1.82393	0.319266	5.71289	1.11072e-08	1.05686e-07	up
A04G006600v1	2.89907	-4.64006	1.90387	-2.43718	0.0148023	0.0369288	down
A04G006700v1	155.76	-3.13399	0.356753	-8.78477	1.56678e-18	4.84268e-17	down
A04G007300v1	70.7534	-1.18018	0.330982	-3.56568	0.000362911	0.00144837	down
A04G008000v1	106.293	1.2126	0.263159	4.60785	4.06853e-06	2.49722e-05	up
A04G009000v1	49.9092	4.80352	0.744993	6.44775	1.13526e-10	1.44948e-09	up
A04G009500v1	19.3118	8.49025	1.53632	5.52636	3.26934e-08	2.88363e-07	up
A04G009700v1	14.015	-5.91894	1.3245	-4.4688	7.86606e-06	4.55136e-05	down
A04G010000v1	2.72695	-4.55118	1.86317	-2.44271	0.0145773	0.0364341	down
A04G010800v1	114.014	-3.89957	0.373159	-10.4501	1.46319e-25	7.80838e-24	down
A04G011100v1	8.63502	-6.21441	1.43318	-4.3361	1.45033e-05	7.91988e-05	down
A04G011700v1	40.1992	3.09034	0.507486	6.08951	1.1326e-09	1.25277e-08	up
A04G013300v1	245.574	1.60397	0.250381	6.40612	1.49271e-10	1.87472e-09	up
A04G014000v1	60.1866	-1.39882	0.353877	-3.95286	7.72241e-05	0.000361274	down
A04G014200v1	10.1793	-3.40279	1.00228	-3.39506	0.000686147	0.00254739	down
A04G014400v1	25.4267	3.26638	0.636229	5.13397	2.83698e-07	2.14975e-06	up
A04G014700v1	37.5852	-8.33602	1.24789	-6.68009	2.388e-11	3.36251e-10	down
A04G015700v1	71.393	10.3773	1.47536	7.03373	2.0108e-12	3.27639e-11	up
A04G015900v1	3.09365	-4.73376	1.85941	-2.54584	0.0109016	0.0284961	down
A04G016000v1	22.1998	-1.70794	0.602476	-2.83487	0.00458449	0.0134807	down
A04G016400v1	441.794	-1.49237	0.210567	-7.08741	1.36648e-12	2.27415e-11	down
A04G016700v1	108.28	-1.09762	0.269524	-4.07243	4.6525e-05	0.00022787	down
A04G016800v1	3013.19	1.88747	0.278584	6.77525	1.2419e-11	1.81652e-10	up
A04G016900v1	45.9841	1.46671	0.398977	3.67619	0.000236743	0.000990085	up
A04G017000v1	362.396	-1.61398	0.295623	-5.45959	4.77232e-08	4.09702e-07	down
A04G017100v1	765.353	2.04929	0.207834	9.86023	6.19058e-23	2.73404e-21	up
A04G018100v1	434.668	1.0049	0.196645	5.11024	3.21748e-07	2.41486e-06	up
A04G018600v1	302.579	1.06655	0.202132	5.27649	1.31683e-07	1.05699e-06	up
A04G019100v1	18.9342	8.46297	1.53626	5.50882	3.61247e-08	3.16269e-07	up
A04G019500v1	7.53935	7.13551	1.77163	4.02765	5.63369e-05	0.000271598	up
A04G021400v1	11.8443	3.96284	0.912628	4.34223	1.41047e-05	7.72689e-05	up
A04G021600v1	4.07243	6.24806	1.93431	3.23013	0.00123733	0.00429539	up
A04G021900v1	5.03573	6.55277	1.91812	3.41624	0.000634912	0.00237872	up
A04G022300v1	258.896	1.04701	0.194168	5.39229	6.95665e-08	5.83457e-07	up
A04G022900v1	26.4544	2.17947	0.520748	4.18528	2.84819e-05	0.000146183	up
A04G023600v1	110.836	-8.03052	1.05675	-7.59923	2.97888e-14	5.98278e-13	down
A04G024600v1	219.645	-1.17837	0.219467	-5.36921	7.90803e-08	6.58756e-07	down
A04G025800v1	117.261	-2.38299	0.31468	-7.57273	3.65471e-14	7.24076e-13	down
A04G026300v1	64.8273	10.238	2.49936	4.09623	4.19934e-05	0.000207877	up
A04G027600v1	13.2949	-2.90677	0.813209	-3.57445	0.000350971	0.00140684	down
A04G027900v1	268.542	3.5892	0.242387	14.8077	1.30616e-49	2.41863e-47	up
A04G028000v1	325.081	-1.85821	0.195101	-9.52434	1.66086e-21	6.59165e-20	down
A04G028100v1	3221.69	1.50252	0.252042	5.9614	2.50083e-09	2.62585e-08	up
A04G029200v1	33.5307	9.2866	1.51278	6.13875	8.31732e-10	9.36834e-09	up
A04G029300v1	326.881	-6.04373	0.381811	-15.8291	1.95927e-56	4.47769e-54	down
A04G029600v1	831.154	-3.92072	0.308511	-12.7085	5.30181e-37	5.57161e-35	down
A04G029800v1	494.509	-1.92117	0.305665	-6.28523	3.27374e-10	3.91556e-09	down
A04G029900v1	189.909	-2.82454	0.254864	-11.0826	1.52449e-28	9.96295e-27	down
A04G030000v1	124.265	-2.79416	0.449782	-6.21227	5.22258e-10	6.07279e-09	down
A04G030300v1	60.8459	-2.30169	0.385475	-5.97105	2.35734e-09	2.4858e-08	down
A04G030400v1	11.6639	-3.62173	0.996814	-3.6333	0.000279819	0.00114951	down
A04G030600v1	730.213	2.4276	0.235208	10.3211	5.65788e-25	2.91558e-23	up
A04G030900v1	32.9732	3.32847	0.61519	5.41047	6.28599e-08	5.29552e-07	up
A04G031600v1	46.554	-2.61596	0.434757	-6.01706	1.77615e-09	1.90996e-08	down
A04G032500v1	82.2085	-2.05645	0.346291	-5.93849	2.87658e-09	2.99076e-08	down
A04G032800v1	30.3119	-1.79188	0.516203	-3.47127	0.000518009	0.00198415	down
A04G034500v1	9.26666	3.9297	1.03129	3.81047	0.0001387	0.000612299	up
A04G035200v1	3.77464	6.13764	1.85534	3.3081	0.000939303	0.00336414	up
A04G035500v1	33.7037	1.55664	0.445066	3.49756	0.000469542	0.00181948	up
A04G035700v1	4916.54	2.67941	0.224712	11.9238	8.90062e-33	7.55779e-31	up
A04G036200v1	34.2475	9.31643	1.51557	6.14714	7.88901e-10	8.91367e-09	up
A04G036900v1	8031.37	-1.80227	0.1533	-11.7565	6.53972e-32	5.24154e-30	down
A04G037100v1	176.409	8.64787	1.00897	8.571	1.02591e-17	2.93484e-16	up
A04G037300v1	24.163	-3.32052	0.642541	-5.1678	2.36864e-07	1.82112e-06	down
A04G037400v1	16.6685	-2.05155	0.647403	-3.16889	0.00153023	0.00517573	down
A04G037500v1	41.2001	-1.70868	0.407262	-4.19553	2.72229e-05	0.000140201	down
A04G038400v1	226.848	-1.04658	0.344309	-3.03967	0.00236841	0.0075882	down
A04G040600v1	171.37	3.0534	0.242885	12.5714	3.0328e-36	3.11264e-34	up
A04G040700v1	2141.8	1.5188	0.160101	9.48651	2.3891e-21	9.27239e-20	up
A04G041200v1	2.89907	-4.64006	1.90387	-2.43718	0.0148023	0.0369288	down
A04G041300v1	9.70943	-6.38354	1.40173	-4.55403	5.26271e-06	3.15409e-05	down
A04G041600v1	10.3885	-2.74458	0.888654	-3.08847	0.00201192	0.00658849	down
A04G041800v1	53.4407	-1.48257	0.45074	-3.28919	0.00100476	0.0035732	down
A04G042700v1	74.7641	-1.10318	0.3892	-2.83449	0.00458995	0.0134947	down
A04G043100v1	110.913	-8.03254	1.05814	-7.59118	3.17002e-14	6.33148e-13	down
A04G043300v1	68.8533	-2.15328	0.352667	-6.10571	1.02345e-09	1.139e-08	down
A04G044000v1	60.6441	-8.05708	1.2249	-6.57773	4.77693e-11	6.45007e-10	down
A04G044200v1	75.1739	6.67593	0.71538	9.332	1.03887e-20	3.86135e-19	up
A04G045200v1	41.6973	-1.10729	0.433829	-2.55236	0.0106995	0.0280297	down
A04G045800v1	37.8551	3.40556	0.571841	5.95543	2.59383e-09	2.71469e-08	up
A04G046000v1	193.94	1.36225	0.50298	2.70836	0.00676164	0.0188853	up
A04G046800v1	157.607	-1.85595	0.27197	-6.82409	8.84841e-12	1.32225e-10	down
A04G046900v1	92.3429	-1.59171	0.304147	-5.23334	1.66471e-07	1.31341e-06	down
A04G047000v1	19.3904	-7.38113	1.30121	-5.6725	1.40729e-08	1.31984e-07	down
A04G047100v1	817.273	1.4737	0.352382	4.18209	2.88839e-05	0.000147999	up
A04G047700v1	6.73876	-3.86671	1.35502	-2.85361	0.00432253	0.0128127	down
A04G048000v1	5.47257	-3.53351	1.42329	-2.48264	0.0130412	0.0331323	down
A04G048100v1	44.0047	-3.16494	0.546993	-5.78607	7.20526e-09	7.05122e-08	down
A04G048500v1	11.9785	7.80279	1.59873	4.88062	1.05753e-06	7.22213e-06	up
A04G048600v1	114.838	-1.6245	0.28049	-5.79164	6.97035e-09	6.83657e-08	down
A04G048700v1	45.3661	-5.71001	0.809689	-7.0521	1.76234e-12	2.89765e-11	down
A04G049500v1	102.143	-2.15231	0.493727	-4.3593	1.30477e-05	7.19208e-05	down
A04G049900v1	9.56911	3.97098	1.00448	3.95325	7.70952e-05	0.000360781	up
A04G050100v1	40.4709	-1.6673	0.433418	-3.84686	0.000119641	0.000535582	down
A04G050200v1	4.83094	5.02267	1.77736	2.82592	0.00471447	0.0138156	up
A04G050400v1	25.7848	1.3149	0.559	2.35223	0.0186611	0.0450106	up
A04G050900v1	12.0534	7.80949	1.58863	4.91585	8.83991e-07	6.12685e-06	up
A04G051000v1	4.86812	-4.32901	1.56675	-2.76305	0.00572643	0.0163573	down
A04G051500v1	226.171	-1.05014	0.226102	-4.64456	3.40801e-06	2.12233e-05	down
A04G051600v1	27.4867	-1.29434	0.481296	-2.68929	0.00716035	0.0198573	down
A04G052100v1	69.3187	-1.96069	0.337316	-5.81263	6.14985e-09	6.08521e-08	down
A04G052900v1	4.69029	3.33471	1.321	2.52439	0.0115899	0.0299947	up
A04G053500v1	380.845	-3.09796	0.334665	-9.25691	2.10435e-20	7.61892e-19	down
A04G053700v1	67.5302	-1.3806	0.341119	-4.04728	5.18151e-05	0.000251396	down
A04G053800v1	3.74311	6.12631	2.22997	2.74726	0.00600963	0.0170373	up
A04G054100v1	4.44607	6.37014	1.79792	3.54306	0.000395509	0.00156294	up
A04G054200v1	226.297	-3.20705	0.249902	-12.8332	1.06802e-37	1.1683e-35	down
A04G054300v1	18.0239	-2.82267	0.681148	-4.14399	3.41313e-05	0.000172231	down
A04G054400v1	68.8094	-1.07798	0.426572	-2.52707	0.0115018	0.0298064	down
A04G054500v1	114.432	-1.87858	0.292216	-6.42873	1.28677e-10	1.63208e-09	down
A04G059800v1	13.6376	-6.87339	1.3417	-5.12289	3.00885e-07	2.2713e-06	down
A04G060000v1	3.48965	6.0213	1.97595	3.04729	0.00230916	0.00742238	up
A04G060100v1	14.4406	8.06982	1.87914	4.29442	1.75148e-05	9.4087e-05	up
A04G060200v1	6.9881	7.02249	1.68724	4.16213	3.15299e-05	0.000160195	up
A04G060700v1	10.6557	-1.82559	0.780003	-2.3405	0.0192581	0.0462129	down
A04G061100v1	76.1908	8.02652	1.07221	7.48595	7.10329e-14	1.35575e-12	up
A04G061200v1	8.90978	-4.29504	1.28259	-3.34872	0.000811864	0.00295454	down
A04G061300v1	231.478	2.22091	0.245779	9.03622	1.62183e-19	5.41583e-18	up
A04G061500v1	684.205	10.6093	0.872367	12.1615	4.98336e-34	4.49211e-32	up
A04G061600v1	619.919	9.24566	0.645706	14.3187	1.67271e-46	2.71328e-44	up
A04G061800v1	7.11186	4.57635	1.44401	3.1692	0.00152861	0.00517124	up
A04G062100v1	96.2134	8.36235	1.05518	7.92506	2.28035e-15	5.20183e-14	up
A04G062600v1	582.569	1.28323	0.177386	7.23407	4.68737e-13	8.23095e-12	up
A04G062700v1	876.529	1.93057	0.378962	5.09435	3.49931e-07	2.60981e-06	up
A04G062800v1	312.341	1.11668	0.184553	6.05071	1.44206e-09	1.56993e-08	up
[truncated: 17,140 more rows]
